# Supplementary material for: m6A modification of U6 snRNA modulates usage of two major classes of pre-mRNA 5’ splice site
Source: bioRxiv preprint, doi:10.1101/2022.04.05.487178, version 1 (2022-04-05)
Supplement: Figure 5 source data 1 [file 487178_file16.xlsx]

## Sheet: nmd_psi_fit
Figure 5 source data 1: Differential productive transcription/NMD analysis results from Illumina RNA-Seq experiment on Col-0 and fio1-3 mutants at four temperatures
	change_in_fraction_productive		coefficients					p_vals					fdrs
gene_id	fio1_20c_vs_col0_20c	col04_vs_col0_20c	constant	genotype	temperature	geno_x_temp	temp_x_temp	constant	genotype	temperature	geno_x_temp	temp_x_temp	constant	genotype	temperature	geno_x_temp	temp_x_temp
AT1G01020	-0.219884	-0.135257	0.252227	-0.118932	0.0119641	-0.00327112	-0.000196281	1.32537e-15	0.000239334	0.00387358	0.0640278	0.111762	1.46456e-15	0.00191665	0.021083	0.278098	0.28006
AT1G01040	0.0209609	0.0926802	0.861208	0.0157574	-0.0137156	0.000829849	0.000363352	0	0.472932	1.04571e-06	0.488405	1.41573e-05	0	0.719509	1.83172e-05	0.769562	0.000201933
AT1G01060	0.000182746	-0.0102394	0.985765	0.00460812	0.000347331	-0.000217425	8.48037e-06	0	0.113853	0.338027	0.217063	0.464907	0	0.299496	0.554594	0.533661	0.664068
AT1G01070	0.0345114	-0.0100933	0.932861	0.00820756	0.00235207	0.000572908	-4.36821e-05	0	0.661008	0.325984	0.574736	0.540384	0	0.847576	0.544354	0.824269	0.724915
AT1G01100	0.00162583	0.00105204	0.977384	0.000291049	-0.000668554	-8.33402e-06	2.50279e-05	0	0.94321	0.200909	0.970174	0.108073	0	0.986655	0.398801	1	0.273734
AT1G01110	-0.000641865	-0.00689597	0.970689	0.00276992	0.00177015	0.000107056	-7.25641e-05	0	0.85777	0.359868	0.896908	0.201308	0	0.950422	0.574689	0.978703	0.404578
AT1G01160	-0.0222975	0.0533319	0.935772	-0.0252307	-0.00751287	0.000527305	0.00018909	0	0.0545819	7.68966e-06	0.461502	0.000157499	0	0.178782	0.000105334	0.752779	0.0016249
AT1G01210	0.0164568	-0.00227807	0.952693	0.00105755	0.00338072	0.00126565	-0.000166864	0	0.904108	0.00261097	0.00822054	6.15029e-07	0	0.973204	0.0153749	0.0718577	1.20145e-05
AT1G01220	-0.109035	-0.260945	0.336531	-0.0360795	0.00113945	-0.00188508	0.00054502	2.01354e-16	0.390256	0.832048	0.410605	0.000662782	2.23214e-16	0.641926	0.922713	0.714107	0.00544475
AT1G01230	-0.0130404	-0.0151895	0.962688	-0.0064107	0.00141072	-0.00016323	-1.97011e-05	0	0.0551926	0.000974419	0.37085	0.12218	0	0.180218	0.00691638	0.687956	0.296892
AT1G01290	-0.0463111	0.00259381	0.974104	0.0264447	0.0044389	-0.00388596	-0.000162592	0	0.0371807	0.00625959	1.99064e-08	0.000777099	0	0.134636	0.0310938	1.16915e-06	0.00618513
AT1G01320	-0.00451702	0.0152661	0.965119	-0.00450586	0.00225975	0.000556518	-0.000158702	0	0.637619	0.0648375	0.286243	1.34908e-05	0	0.832192	0.182471	0.609377	0.000193885
AT1G01340	0.00267743	-0.0120553	0.973256	0.000537563	0.000308501	0.0002233	-7.25775e-06	0	0.977856	0.900916	0.832617	0.92169	0	1	0.95863	0.955611	0.968351
AT1G01350	-0.0051835	-0.0198415	0.958929	0.00923316	0.0020683	-0.000630409	-4.51063e-05	0	0.136712	0.00917293	0.0625381	0.0565112	0	0.335422	0.041778	0.274666	0.176262
AT1G01370	-0.0821223	-0.0311838	0.915468	-0.0446681	0.0045652	-0.000696451	-9.63913e-05	5.46317e-284	0.0852695	0.175276	0.629233	0.337727	8.54667e-284	0.244881	0.365236	0.858484	0.549838
AT1G01430	-0.0175169	0.0762318	0.182545	0.0227529	-0.0141161	-0.00171863	0.000349862	2.90167e-17	0.304563	6.40314e-07	0.155159	3.4532e-05	3.22304e-17	0.557393	1.18392e-05	0.45564	0.0004452
AT1G01440	-0.116739	0.00260085	1.00769	-0.0558343	-0.0017455	-0.00216456	4.66106e-05	0	7.90356e-06	0.27497	0.00149887	0.327884	0	8.94476e-05	0.489865	0.01952	0.538837
AT1G01480	-0.028749	-0.0128892	0.978847	-0.0019893	-0.000129739	0.000297819	-9.62955e-06	0	0.922204	0.96159	0.784417	0.905083	0	0.979858	0.990817	0.93547	0.95717
AT1G01490	0.00346354	-0.00852073	0.96996	0.00370349	0.000952147	-5.7815e-05	-1.33706e-05	0	0.0646369	0.000204806	0.596984	0.0801309	0	0.201957	0.00187794	0.837775	0.223848
AT1G01540	0.00297775	-0.0215204	0.922989	0.00283849	0.00494075	-1.53953e-05	-0.000153937	0	0.620484	1.62099e-11	0.960737	1.86395e-12	0	0.82192	7.071e-10	0.998547	1.12413e-10
AT1G01610	0.000540341	-0.0119089	0.975438	0.00707993	0.000666968	-0.000230172	-7.68476e-07	0	0.000899937	0.0145003	0.0478704	0.924686	0	0.00614035	0.059362	0.235832	0.969911
AT1G01620	-0.00155616	-0.000184411	0.994123	0.00235632	-0.000215946	-0.000156813	8.14967e-06	0	0.00350066	0.0364748	0.000368007	0.00806757	0	0.0195385	0.119273	0.00623946	0.0409809
AT1G01650	-0.144628	-0.0136273	0.756823	-0.0877467	0.00618437	-0.00307462	-0.000170594	2.43517e-165	0.00195443	0.0879897	0.0466777	0.114222	3.43685e-165	0.0120373	0.227393	0.23229	0.283817
AT1G01710	-0.0630576	-0.00505047	0.956008	-0.0548036	0.00211654	-0.00109579	-5.61994e-05	0	3.36712e-06	0.160689	0.0885316	0.211273	0	4.03426e-05	0.344865	0.336352	0.416704
AT1G01720	0.00494974	-0.0406698	0.762436	-0.0591855	0.00595232	0.00125554	-7.3684e-05	0	0.00136946	0.0118626	0.213234	0.295842	0	0.00880257	0.0511256	0.528029	0.510844
AT1G01740	-0.305837	-0.263189	0.233411	-0.120053	0.0176997	-0.00745238	-0.000125517	4.43378e-05	0.040622	0.0183117	0.0198261	0.574448	4.705e-05	0.143996	0.071141	0.132262	0.751767
AT1G01760	0.172892	-0.0371065	0.451252	0.162088	-0.0142659	0.000663648	0.000633492	3.47375e-10	0.0279907	0.130626	0.869008	0.0242674	3.76267e-10	0.108043	0.299365	0.966148	0.0947857
AT1G01770	-0.146535	-0.0866581	0.70756	-0.034466	0.0292504	-0.00738037	-0.000932564	1.22727e-230	0.123664	1.74378e-24	1.51211e-09	8.51112e-28	1.84883e-230	0.313946	4.01785e-22	1.05332e-07	3.82405e-25
AT1G01790	0.0130979	0.055435	0.834432	-0.0687177	0.00809703	0.00301127	-0.00048878	1.71349e-164	0.0282257	0.0433075	0.0779954	4.24091e-05	2.41566e-164	0.108767	0.135502	0.312329	0.000531504
AT1G01800	-0.000196201	-0.00100083	0.997454	0.000438927	9.04849e-05	-4.96927e-07	-1.15342e-06	0	0.649526	0.464046	0.992476	0.754093	0	0.840893	0.670082	1	0.876462
AT1G01860	0.0260216	0.0335326	0.843941	-0.00815724	-0.0047719	0.000696617	0.000140874	0	0.677135	0.0569358	0.514538	0.0592557	0	0.854206	0.165896	0.786467	0.181669
AT1G01910	0.00149126	-0.00562801	0.989012	-0.000681585	0.000575991	6.99e-05	-1.06366e-05	0	0.730331	0.0228038	0.51701	0.158234	0	0.883159	0.0840256	0.788367	0.348161
AT1G01920	0.0863496	0.0157155	0.743368	0.102914	0.000736169	-0.000213575	-9.74712e-05	3.77871e-78	0.0115545	0.887712	0.923465	0.530365	4.77171e-78	0.0530549	0.952021	0.986244	0.717091
AT1G01930	-0.0142796	0.000439004	0.971136	-0.00833146	-9.56968e-05	-0.000203547	-4.67131e-08	0	0.330682	0.930409	0.66311	0.998858	0	0.584414	0.975613	0.876023	1
AT1G01940	-0.019903	0.0191913	0.976834	0.0138228	0.00233484	-0.00267338	-9.88126e-05	2.31614e-127	0.740535	0.661975	0.240409	0.534619	3.11757e-127	0.88891	0.819353	0.560685	0.719754
AT1G01950	-0.100583	-0.0739031	0.800352	-0.0263814	0.00603163	-0.00347297	-6.60308e-05	9.35773e-106	0.482821	0.209818	0.0903731	0.644968	1.22829e-105	0.727104	0.409875	0.340072	0.804894
AT1G01960	0.0228507	0.0221683	0.923076	-0.000989681	-0.00151158	0.00176058	2.95022e-06	0	0.936058	0.338208	0.00889619	0.949978	0	0.983687	0.554789	0.0761344	0.983355
AT1G02010	-0.0549031	-0.0438353	0.723357	-0.136122	0.0056211	0.00465608	-8.13523e-05	1.32306e-54	0.00431035	0.356881	0.0734936	0.654503	1.60445e-54	0.023235	0.571521	0.302764	0.811335
AT1G02020	0	0.00693361	0.00851019	-0.00519849	-0.000744231	0.000222196	1.55117e-05	0.0126181	0.137482	0.0965261	0.244565	0.245012	0.0131706	0.336517	0.242935	0.564448	0.457159
AT1G02050	-0.0282153	0.128922	0.844806	-0.0427364	-0.000900495	0.00114532	-0.000312499	7.62996e-182	0.156202	0.815352	0.486072	0.00653053	1.09543e-181	0.366005	0.912764	0.768301	0.0349514
AT1G02065	0.000590472	-0.0842115	0.781449	0.0127858	-0.000768809	0.000631326	0.000195112	3.57398e-269	0.576135	0.792754	0.612867	0.0252301	5.53912e-269	0.792098	0.899341	0.847202	0.097597
AT1G02090	0.000994279	-0.0619561	0.850079	0.0264299	0.00662015	-0.000853328	-0.000124426	0	3.17879e-05	3.79857e-16	0.0138115	2.78101e-07	0	0.000322764	3.3796e-14	0.104823	5.97851e-06
AT1G02100	-0.265915	0.0942548	0.893839	-0.160178	-0.0116904	-0.00315768	0.000250222	1.26611e-130	2.15845e-05	0.0153863	0.12479	0.081736	1.71113e-130	0.000225795	0.0620084	0.407197	0.226551
AT1G02120	0.0391707	0.0416723	0.855785	0.00736827	0.00306711	0.0019486	-0.000252236	0	0.508658	0.0315285	0.00135573	2.93608e-09	0	0.74334	0.106952	0.0179155	1.00318e-07
AT1G02145	0.15119	0.011962	0.531689	0.164653	0.00516245	0.000928144	-0.00029614	4.34877e-47	1.35872e-05	0.286369	0.653057	0.0401159	5.20763e-47	0.000147815	0.502796	0.873746	0.137904
AT1G02205	-0.284991	-0.105953	0.560145	-0.356771	0.020486	0.00596033	-0.00065463	3.7409e-23	7.60221e-10	0.00575362	0.0595309	0.00306026	4.22467e-23	1.5047e-08	0.0290298	0.266186	0.0193322
AT1G02260	-0.025968	-0.02653	0.961166	-0.069423	0.00191104	0.00229767	-3.50545e-05	0	1.1129e-07	0.253501	0.00128296	0.482067	0	1.63943e-06	0.465482	0.0172327	0.678549
AT1G02270	-0.0123327	-0.00558222	0.986438	-0.021163	0.000407578	0.000402525	-1.08515e-06	0	2.94462e-05	0.529435	0.145242	0.955188	0	0.000300345	0.718765	0.440925	0.985875
AT1G02300	-0.00508982	-0.0446418	0.254223	-0.15398	0.0127968	0.00721067	-0.000407467	3.8531e-11	9.5281e-05	0.0112504	0.000809049	0.00675159	4.18265e-11	0.000851089	0.0488858	0.0118021	0.0358781
AT1G02305	-0.00416998	-4.24308e-05	0.99891	-0.000116332	-0.000175119	-1.56103e-06	1.88027e-06	0	0.954383	0.500918	0.988774	0.808365	0	0.991799	0.696464	1	0.906522
AT1G02340	-0.0413545	-0.028498	0.905489	-0.00590968	0.00456711	-0.00165911	-9.19652e-05	0	0.682184	0.0133814	0.0350944	0.0946032	0	0.856758	0.0560061	0.193116	0.250399
AT1G02350	0	0						1	1	1	1	1	1	1	1	1	1
AT1G02380	0.00373606	0.023528	0.931665	0.0824301	0.000475175	-0.00394657	4.82913e-05	1.75605e-95	0.0387849	0.922446	0.051374	0.716086	2.27146e-95	0.139186	0.971872	0.244516	0.853156
AT1G02400	-0.00478151	-0.0437725	0.920143	0.0240851	0.00476625	-0.000882367	-0.000125939	0	0.0287712	0.000719327	0.141999	0.00270614	0	0.110298	0.00534646	0.436539	0.0174068
AT1G02560	0.000570282	0.000690151	0.999042	0.000643547	-0.000109884	1.14301e-05	2.66076e-06	0	0.245189	0.120918	0.705173	0.207525	0	0.487028	0.283848	0.898105	0.411757
AT1G02610	-0.00595364	-0.012874	0.921025	0.000757771	0.000134772	-1.90422e-05	2.10048e-05	0	0.889123	0.846332	0.948797	0.310714	0	0.966206	0.931157	0.993847	0.523286
AT1G02620	0.0188119	-0.293043	0.251856	0.0315945	0.026661	-0.00133953	-0.000352667	4.44851e-06	0.57468	0.000214531	0.66275	0.100346	4.7436e-06	0.790944	0.00194332	0.876023	0.260083
AT1G02640	-0.0178555	-0.00908598	0.971261	-0.011288	0.00120249	-0.000361701	-2.79205e-05	0	0.00114792	0.00678327	0.0561599	0.0348828	0	0.00752934	0.0331815	0.257739	0.124388
AT1G02650	-0.0293601		0.911246	0.0688376	0.000129006	-0.00390805	6.60981e-05	7.80584e-12	0.30861	0.9927	0.223934	0.849304	8.495e-12	0.56125	1	0.540206	0.927304
AT1G02680	0.000314214	0.00401234	0.985493	0.00500822	-0.000548216	-0.000270565	1.49823e-05	0	0.370885	0.443926	0.375554	0.482552	0	0.626226	0.652777	0.690179	0.679125
AT1G02740	0.00137478	-0.0189208	0.968719	-0.0151704	0.0019407	0.000668659	-3.97929e-05	0	0.119071	0.119113	0.207915	0.283491	0	0.307467	0.28182	0.522928	0.498522
AT1G02750	-0.000998958	-0.0714996	0.856142	0.0262971	0.00441244	-0.00122341	-1.87991e-05	0	0.0265348	0.00362322	0.0585319	0.677417	0	0.103088	0.0199255	0.263643	0.829181
AT1G02770	0.00794201	-0.0696807	0.908998	0.012643	0.00534943	-0.00101066	-6.61629e-05	0	0.571749	0.0546082	0.428026	0.439045	0	0.788965	0.1611	0.72694	0.643598
AT1G02780	1.406e-05	1.406e-05	0.999987	2.51512e-05	5.82498e-07	-1.6961e-06	-1.55184e-08	0	0.323171	0.858063	0.221994	0.872956	0	0.576994	0.937832	0.53758	0.941138
AT1G02840	-0.118992	0.153065	0.763791	-0.0898415	-0.0202958	-0.000335369	0.000472936	9.87746e-230	0.000206986	5.70246e-11	0.799588	2.99801e-07	1.48675e-229	0.00168935	2.26736e-09	0.942432	6.38391e-06
AT1G02850	-0.0213567	0.0283557	0.867761	-0.0555845	-0.00236538	0.00159707	5.6135e-05	0	0.00216486	0.307733	0.106288	0.416555	0	0.0131709	0.525221	0.372359	0.625425
AT1G02860	-0.00298277	0.0204573	0.979637	0.00679204	-0.000859159	-0.000619875	-8.92799e-06	0	0.516978	0.521728	0.278335	0.823189	0	0.749421	0.71315	0.601556	0.91541
AT1G02880	-0.0568293	-0.148275	0.200612	0.00967278	0.00459441	-0.00222388	0.000122864	7.06933e-12	0.747272	0.231576	0.174456	0.282957	7.69814e-12	0.89212	0.438092	0.477219	0.497919
AT1G02910	-0.00972611	0.0495118	0.818636	-0.0142295	0.00290513	-0.000567184	-0.000199244	1.46898e-270	0.551551	0.342026	0.663525	0.0287358	2.27945e-270	0.774774	0.558291	0.876185	0.107502
AT1G02930	-0.0023021	-0.0165765	0.958043	-0.0228007	0.0035218	0.000810062	-9.31776e-05	0	4.37881e-11	1.76659e-15	1.76999e-05	1.60336e-12	0	1.01412e-09	1.34531e-13	0.000483438	9.86832e-11
AT1G02950	0	0						1	1	1	1	1	1	1	1	1	1
AT1G02960	0.15068	-0.0522827	0.443356	-0.0239617	0.00841423	0.00751989	-0.000247011	5.0673e-37	0.503053	0.0660523	0.000116928	0.0701465	5.94061e-37	0.7404	0.18472	0.00236877	0.203822
AT1G02990	-0.0257045	-0.0238187	0.910317	0.035262	-0.000763827	-0.00134205	6.09724e-05	0	0.116813	0.790606	0.273911	0.476863	0	0.303703	0.897699	0.596428	0.673756
AT1G03000	0.264699	0.0172653	0.626366	0.291059	-0.00313023	-0.00126008	0.000108394	1.49629e-92	2.40581e-20	0.437205	0.463272	0.366565	1.92796e-92	1.20103e-18	0.64745	0.754023	0.578089
AT1G03030	0.00644935	-0.0194906	0.871614	0.015182	0.00212275	-0.000737411	-1.99088e-05	0	0.514415	0.476148	0.561594	0.822542	0	0.747596	0.678722	0.81645	0.915225
AT1G03040	0.00214843	0.0032939	0.937583	0.0204581	-0.00473196	-0.000742319	0.000181325	0	0.000838425	1.56161e-09	0.0263282	8.15981e-15	0	0.00575561	4.6435e-08	0.159691	6.60577e-13
AT1G03090	-0.00848442	0.0620505	0.954138	0.000712222	-0.00377757	-0.000873275	2.21956e-05	0	0.921884	4.7989e-05	0.0275274	0.422756	0	0.979858	0.000529766	0.164033	0.629928
AT1G03110	-0.0543371	0.00727771	0.928947	-0.0189215	-0.00179483	-4.44692e-05	1.56967e-05	0	0.437759	0.565076	0.973332	0.865903	0	0.687738	0.748109	1	0.937583
AT1G03150	0.000948392	-0.00249597	0.991419	-0.00119973	0.000527383	4.78965e-05	-1.26755e-05	0	0.558945	0.0446511	0.668893	0.105297	0	0.780447	0.138632	0.878589	0.268677
AT1G03160	-0.508944	0.0101761	0.792286	-0.51405	0.00428931	-0.00164235	-0.000170667	3.70815e-145	3.33942e-59	0.289969	0.342002	0.157628	5.10283e-145	7.31903e-57	0.507431	0.662741	0.347254
AT1G03180	0.0191898	-0.17147	0.469933	0.0944026	-0.0063994	-0.0043942	0.000681188	2.74468e-14	0.136195	0.429809	0.203585	0.00479396	3.01696e-14	0.334568	0.639554	0.518307	0.0273688
AT1G03190	-0.0548782	-0.0171895	0.678111	-0.0676723	0.00731119	0.00219772	-0.000316185	2.49736e-52	0.138657	0.211137	0.378038	0.0695317	3.01752e-52	0.33858	0.411556	0.690741	0.202993
AT1G03200	-0.0400017	-0.0100293	0.0941267	-0.0013963	-0.00828304	-0.000262747	0.00030447	0.000540294	0.960099	0.0203577	0.862991	0.00421321	0.000569645	0.994748	0.0770249	0.965086	0.0248914
AT1G03250	0.0103667	-0.0945219	0.812866	0.021689	0.0123144	-0.000878927	-0.000262123	0	0.0820282	1.18728e-14	0.196431	3.52259e-08	0	0.239275	7.90287e-13	0.506493	9.50572e-07
AT1G03270	-0.0874427	0.00867173	0.999588	0.0170838	-0.0086036	-0.00350318	0.000278747	9.4191e-161	0.737147	0.106121	0.164537	0.0861305	1.32126e-160	0.88674	0.259376	0.470636	0.234394
AT1G03280	0.00448756	-0.000605855	0.976726	0.00329123	0.000130366	0.000101342	-2.3223e-06	0	0.629642	0.88132	0.785484	0.928877	0	0.828278	0.949675	0.93637	0.971978
AT1G03340	0.0492235	0.0199579	0.855853	-0.0469843	0.0059	0.00293957	-0.0002192	1.27554e-94	0.272136	0.279256	0.215044	0.181719	1.64826e-94	0.521522	0.494929	0.531167	0.380192
AT1G03365	-0.074943	0.0140056	0.983761	0.00830841	-0.00492712	-0.00224276	0.000129413	0	0.753237	0.14507	0.119818	0.198962	0	0.895835	0.321111	0.397886	0.401588
AT1G03370	-0.0238423	-0.148053	0.689725	-0.00190025	0.00550025	-0.000479473	7.93163e-05	1.76239e-173	0.939891	0.0880117	0.727264	0.408998	2.50861e-173	0.985688	0.227393	0.909597	0.619167
AT1G03410	-0.0139713	0.0296209	0.880704	0.009772	0.00415658	-0.000850727	-0.000212593	7.02841e-142	0.78387	0.361836	0.661609	0.117517	9.64381e-142	0.911118	0.576603	0.875236	0.288842
AT1G03430	-0.159622	0.0720697	0.933975	-0.0459343	-0.00161087	-0.00501268	-0.000147932	0	0.0150507	0.505166	1.15542e-06	0.0399879	0	0.0653676	0.700203	4.59407e-05	0.137569
AT1G03475	-0.0118947	-0.00714178	0.973902	-0.00719334	0.00123365	-0.00027593	-3.24687e-05	0	0.0101492	0.000569164	0.0706765	0.00233584	0	0.0479501	0.00443583	0.295085	0.0154679
AT1G03520	-0.0705671	-0.150274	0.5576	-0.121197	0.0184647	0.00217446	-0.000377553	8.95731e-63	0.000395621	2.45396e-05	0.243938	0.00378813	1.10125e-62	0.00300511	0.000290531	0.564204	0.0229845
AT1G03550	0.0766827	0.0900172	0.975906	-0.0744527	-0.00652004	0.00519962	6.53664e-05	1.08305e-74	0.173897	0.351987	0.0817304	0.754152	1.35926e-74	0.393116	0.567753	0.321953	0.876462
AT1G03580	0.0189374	0.159648	0.312741	0.0222803	-0.0197293	0.000596695	0.000414375	3.75569e-28	0.444874	1.23875e-07	0.707624	0.000193547	4.30248e-28	0.694758	2.58269e-06	0.899269	0.00192391
AT1G03590	0.00328202	-0.0445708	0.909857	0.0189757	0.00257462	-0.000548711	-6.24785e-06	0	0.00680457	0.00410546	0.151445	0.815185	0	0.0338571	0.022038	0.450774	0.909631
AT1G03610	-0.0285796	-0.0853638	0.829124	-0.0294897	0.00974364	-0.000101939	-0.000193458	0	0.0102211	3.30042e-11	0.870728	9.88513e-06	0	0.0481824	1.36044e-09	0.967257	0.000147066
AT1G03620	0.0780702	0.241928	0.875667	-0.0426645	-0.0124636	0.00532859	-9.80498e-05	3.76611e-33	0.571433	0.168399	0.171467	0.707875	4.36844e-33	0.788791	0.355888	0.473525	0.849053
AT1G03630	-0.00261594	0.000791795	1.00001	-0.00131983	6.94758e-05	6.48184e-05	-9.07656e-06	0	0.696325	0.872425	0.725329	0.481383	0	0.864968	0.946242	0.908532	0.677905
AT1G03687	0.0176338	-0.0857026	0.782288	0.00101087	0.0136614	-0.000213189	-0.000301749	0	0.956257	6.87447e-09	0.832073	1.74629e-05	0	0.992685	1.80626e-07	0.955528	0.000242913
AT1G03700	0.0049772	-0.0141315	0.961854	0.00696826	0.00191834	-0.000343861	-4.31749e-05	0	0.458632	0.118535	0.504593	0.239358	0	0.70618	0.28082	0.78063	0.450161
AT1G03740	0.0157489	-0.0614253	0.72506	-0.00352585	0.0120722	-0.000116717	-0.000323932	0	0.838487	4.90318e-08	0.901567	8.9985e-07	0	0.942184	1.10982e-06	0.979997	1.69875e-05
AT1G03750	-0.0037433	0.0141252	0.887367	0.0347042	0.00235429	-0.00189298	-0.000110604	0	0.118366	0.407644	0.118423	0.191685	0	0.306083	0.619707	0.395303	0.392455
AT1G03770	-0.0174807	-0.00947285	0.972054	-0.0123395	-0.00194052	0.0002911	7.8957e-05	0	0.384765	0.285372	0.707032	0.144595	0	0.637753	0.501438	0.899149	0.327796
AT1G03780	-0.00508185	-0.00813371	0.974683	0.00104625	0.000686181	-6.28445e-05	-4.9102e-06	0	0.894104	0.495013	0.883478	0.869828	0	0.968205	0.693016	0.972687	0.939569
AT1G03830	-0.0317929	-0.0413917	0.887638	0.00370361	0.0070211	-0.00210729	-0.000179121	4.47146e-250	0.890739	0.0418063	0.15194	0.0813687	6.83692e-250	0.966689	0.131907	0.451301	0.226005
AT1G03840	-0.00246438	-0.0238631	0.95243	0.0156559	0.00121557	-0.000447343	-1.02468e-08	0	0.2963	0.530064	0.586972	0.999856	0	0.550057	0.719075	0.831487	1
AT1G03850	0.000883615	-0.0154545	0.040286	-0.0117155	-0.00265635	0.0011425	0.000133283	4.17375e-10	0.0765721	0.00169846	0.0015472	1.25661e-07	4.51872e-10	0.227614	0.0108862	0.0199697	3.01118e-06
AT1G03860	0.000511157	0.0025851	0.985888	0.00108993	-0.000441061	-0.000120021	1.90052e-05	0	0.72027	0.257367	0.469789	0.101424	0	0.877269	0.470602	0.757089	0.261623
AT1G03905	-0.0751383	0.248471	0.887448	-0.0411581	0.000293569	0.00301194	-0.000757646	4.94756e-114	0.304888	0.954386	0.16873	7.25317e-07	6.54383e-114	0.557696	0.988145	0.473525	1.39267e-05
AT1G03910	-0.0645701	-0.00957013	0.967888	-0.0579807	-0.000523598	-7.66778e-05	4.29854e-05	0	7.95681e-15	0.583479	0.850631	0.130849	0	2.71863e-13	0.760537	0.962026	0.309016
AT1G03920	0.00319839	-0.0166228	0.251872	-0.0382299	0.00826298	0.00205042	-0.000294273	0.00103877	0.627497	0.412349	0.633315	0.32717	0.0010934	0.826182	0.623905	0.861094	0.538452
AT1G03960	0.204609	0.02838	0.333044	0.160489	0.00540078	0.00259027	-0.000334184	7.3806e-07	0.0200386	0.540737	0.491434	0.20397	7.89361e-07	0.0821097	0.727513	0.770674	0.408225
AT1G04010	-0.0298103	0.011241	0.589415	0.00442795	-0.000269845	-0.00327248	6.62169e-05	2.85948e-22	0.943341	0.972995	0.335648	0.780399	3.22278e-22	0.986655	0.996505	0.658401	0.890288
AT1G04080	0.0555086	0.177592	0.804633	0.040397	-0.0263216	0.00138689	0.000705331	4.19463e-161	0.185634	1.57548e-11	0.404872	1.34189e-09	5.88768e-161	0.40895	6.93982e-10	0.709683	4.82328e-08
AT1G04100	-0.0274716	0.0390043	0.956576	-0.0303735	0.00209224	-0.000829015	-0.00010929	3.84803e-96	0.519607	0.728814	0.747322	0.543308	4.98391e-96	0.750267	0.861949	0.917404	0.726456
AT1G04120	0.0777892	0.14274	0.941747	0.0406155	-0.0181272	0.00115773	0.000454797	0	0.0530598	1.49789e-11	0.312143	1.32989e-08	0	0.17465	6.63055e-10	0.635062	3.98347e-07
AT1G04133	-0.0406421	-0.136163	0.812321	0.121521	0.0101845	-0.00670475	-0.000126322	1.29079e-55	0.0219722	0.13345	0.0205119	0.532179	1.5687e-55	0.088144	0.303976	0.134934	0.718474
AT1G04140	-0.00583171	-0.00945659	0.98177	-0.0150685	0.00183362	0.000308486	-4.60058e-05	0	0.000724485	0.00130498	0.20464	0.00678626	0	0.00505452	0.00877737	0.519195	0.0359984
AT1G04160	0.0654712	-0.0125677	0.787647	-0.0630411	0.0146674	0.00628128	-0.00071326	1.75208e-18	0.4937	0.215666	0.21847	0.0435323	1.95241e-18	0.732542	0.417317	0.534779	0.1464
AT1G04190	-0.00650402	-0.00600008	0.939155	-0.0186065	0.00280609	0.00059535	-9.00875e-05	0	0.0668419	0.0307452	0.282408	0.0199257	0	0.206548	0.104929	0.605373	0.0822474
AT1G04200	-0.00258445	-0.00194779	0.893848	-0.0332759	0.00729211	0.000407819	-0.000263153	0	0.0706054	0.00195629	0.684618	0.000176334	0	0.215781	0.0122078	0.887922	0.00178439
AT1G04210	0.0023222	0.0147214	0.988933	-0.0045156	-0.00156499	0.000235186	3.81411e-05	0	0.527321	0.0868469	0.546199	0.161349	0	0.757113	0.225355	0.809929	0.352986
AT1G04250	0	-0.00021148	0.999599	-0.000186402	4.80715e-05	8.2236e-06	-1.25441e-06	0	0.435312	0.11583	0.528114	0.168454	0	0.686024	0.276601	0.797904	0.362553
AT1G04270	6.26397e-05	-0.00145494	0.997567	0.000370436	0.000138919	-1.22201e-05	-2.38441e-06	0	0.34272	0.00541777	0.566149	0.109143	0	0.59788	0.0275674	0.818439	0.275416
AT1G04280	-0.0119781	-0.00474534	0.918019	-0.00216191	-0.00560159	-0.000509819	0.00022661	0	0.837317	3.20739e-05	0.374783	1.64464e-08	0	0.942016	0.000368563	0.689869	4.81392e-07
AT1G04290	0.19717	0.0858713	0.701741	-0.0105027	0.0158392	0.001091	-0.000567375	1.45157e-11	0.921525	0.245552	0.851205	0.162702	1.57763e-11	0.979858	0.455612	0.962026	0.354261
AT1G04300	-0.0020114	-0.115978	0.783013	-0.0114131	0.0104972	0.000143194	-0.000134249	0	0.252504	1.93443e-16	0.792425	0.000414238	0	0.498025	1.77375e-14	0.939384	0.00366733
AT1G04310	-0.259956	0.00429226	0.660308	-0.336219	-0.0172972	0.00429222	0.000694527	6.38457e-74	1.7572e-19	0.000283412	0.0346449	9.9933e-07	8.00387e-74	8.35458e-18	0.00245116	0.191228	1.87846e-05
AT1G04350	-0.00938437	0.0364647	0.938196	-0.0209406	-0.00667154	0.00100373	0.000193313	0	0.25418	0.00451973	0.31642	0.00575764	0	0.500341	0.0238627	0.64025	0.0315862
AT1G04390	0.109464	0.31777	0.580074	0.078812	-0.0369058	-0.000901947	0.000834683	7.4882e-16	0.28564	9.30656e-05	0.822768	0.00301329	8.28376e-16	0.538332	0.000941765	0.950796	0.0190955
AT1G04400	-0.00462129	-0.00751119	0.959157	-0.000323892	0.00157487	-0.00017934	-4.30439e-05	0	0.928256	0.000621926	0.360792	0.0016959	0	0.981373	0.00474824	0.678983	0.0118592
AT1G04410	-2.57711e-05	-5.26874e-05	0.999906	0.000101477	-1.9083e-06	-5.96643e-06	1.82065e-07	0	0.123482	0.820889	0.0968979	0.468484	0	0.313783	0.916818	0.355253	0.666317
AT1G04420	0.0249504	0.0744477	0.967001	-0.000778765	-0.00253686	0.00106919	-7.61342e-05	0	0.923701	0.0147493	0.0159424	0.0140451	0	0.979858	0.0600259	0.114883	0.0636776
AT1G04440	-0.0390201	-0.0123126	0.960285	-0.0239229	-0.00178351	-0.000371775	7.98963e-05	0	5.2521e-05	0.0184463	0.249313	0.000395597	0	0.000504224	0.0714169	0.570271	0.00353715
AT1G04550	-0.0119051	-0.0494696	0.867656	0.0177093	0.00367197	-0.00107205	-4.0888e-05	0	0.202645	0.0389446	0.157437	0.440327	0	0.432761	0.125334	0.460373	0.644702
AT1G04590	-0.00134557	-9.54073e-05	0.998038	-0.000856304	-3.10467e-05	0.000102011	-4.43871e-06	0	0.743618	0.926154	0.4751	0.656513	0	0.890034	0.97361	0.760059	0.812929
AT1G04620	-0.0111304	-0.158465	0.601568	0.0740384	0.0177343	-0.00307502	-0.000382299	3.20883e-238	7.68636e-05	1.33622e-13	0.00261084	8.52346e-08	4.86577e-238	0.000701214	8.22413e-12	0.0301555	2.13944e-06
AT1G04630	0.000280918	-1.46197e-05	0.000378992	0.000837689	-4.21331e-05	-4.0177e-05	1.59113e-06	0.329458	0.0356333	0.408811	0.0647212	0.29515	0.338074	0.130375	0.620871	0.279608	0.510435
AT1G04700	0	-0.00207249	0.997241	0.0029862	6.95653e-05	-0.000111291	1.32265e-06	0	0.088474	0.757666	0.251947	0.844081	0	0.25183	0.880091	0.573308	0.925124
AT1G04730	-0.124237	-0.156712	0.561252	0.0340806	0.0252705	-0.00700811	-0.000603493	1.224e-06	0.774096	0.0998892	0.295185	0.1927	1.30752e-06	0.906072	0.248369	0.619171	0.393903
AT1G04750	-0.0104942	-0.00639118	0.986056	0.000657891	7.35595e-05	-0.000407798	8.29053e-06	0	0.727737	0.760941	7.63442e-05	0.249799	0	0.88186	0.882176	0.00165308	0.46283
AT1G04770	0.00353304	-0.0400514	0.865885	0.0147829	0.0042253	-3.64088e-05	-6.8119e-05	0	0.412759	0.067285	0.970504	0.322155	0	0.664023	0.187132	1	0.535891
AT1G04790	-0.14954	0.013847	0.846125	-0.151522	0.00862609	0.000536704	-0.000423854	5.42401e-186	3.83186e-07	0.023874	0.741668	0.000194864	7.82221e-186	5.24894e-06	0.0868901	0.916051	0.00193486
AT1G04820	0.000838937	-0.00243754	0.994501	0.00322048	0.000192951	-0.000137649	-1.69786e-06	0	8.85914e-08	0.012254	2.78295e-05	0.459475	0	1.33571e-06	0.0523854	0.000704439	0.65977
AT1G04830	-0.0945408	-0.0232816	0.727964	-0.031474	-0.00469701	-0.00267458	0.00024331	1.8499e-153	0.266083	0.194557	0.0832163	0.0241165	2.57166e-153	0.513866	0.390679	0.325689	0.0942632
AT1G04850	0	0	0.999963	7.06693e-05	-2.81947e-08	-4.10659e-06	3.87809e-08	0	0.273184	0.997274	0.243141	0.874663	0	0.522964	1	0.563174	0.941603
AT1G04860	0.0212696	-0.0104198	0.937656	0.021815	0.00195645	-0.00036916	-4.27928e-05	0	0.00343924	0.0402975	0.364165	0.132226	0	0.0192846	0.128454	0.681748	0.310782
AT1G04870	-0.00171567	0.000696087	0.999644	-0.00171609	-0.000215597	-2.70133e-05	7.20565e-06	0	0.459692	0.467833	0.831067	0.415435	0	0.706843	0.672094	0.954944	0.624526
AT1G04900	-0.372734	0.01314	0.966152	-0.206866	0.000973522	-0.00697232	-8.75376e-05	4.86166e-175	3.93426e-09	0.828568	0.000275797	0.51345	6.93553e-175	7.17105e-08	0.920921	0.00489785	0.704728
AT1G04910	0.00922498	0.0501794	0.886963	0.0225244	-0.00685123	-0.000398022	0.000178762	0	0.19325	0.00198097	0.673453	0.00675717	0	0.420166	0.0123105	0.881265	0.0358865
AT1G04930	0.0289088	0.0181575	0.0330245	-0.00939544	-0.00431084	0.00156955	0.000132789	0.0208906	0.521789	0.0216031	0.0498103	0.0175504	0.0217474	0.752616	0.0807158	0.2409	0.0747076
AT1G04950	-0.0333692	0.0787074	0.890756	0.014826	0.0120348	-0.0042529	-0.000630332	1.72261e-296	0.550455	0.000151733	0.00169228	2.75631e-11	2.72045e-296	0.774204	0.00144743	0.0215261	1.30359e-09
AT1G04960	0.00270294	-0.00203039	0.984	-0.00423436	0.000783102	0.00030508	-2.46784e-05	0	0.30512	0.138238	0.175618	0.116915	0	0.557696	0.311174	0.478503	0.287914
AT1G04970	0.0021012	-0.0120709	0.887509	0.0432123	-0.0046842	-0.00175304	0.00021848	0	5.13667e-06	0.00011211	0.000698225	1.47814e-09	0	5.95589e-05	0.00110463	0.0105805	5.29188e-08
AT1G04985	-0.063775	-0.0185368	0.913205	-0.0966123	-0.00102512	0.0016667	7.32017e-05	0	2.18749e-10	0.598591	0.0447226	0.207083	0	4.63604e-09	0.771616	0.225647	0.411601
AT1G04990	-0.0577679	-0.214518	0.433313	-0.166617	0.0294019	0.00562197	-0.000632534	5.22651e-52	1.28878e-08	4.34433e-15	0.000435239	1.47878e-08	6.30832e-52	2.19337e-07	3.09827e-13	0.00709811	4.37117e-07
AT1G05000	-0.0260617	-0.0482762	0.889789	-0.00738428	0.00278239	-0.000231075	-1.69597e-05	0	0.31309	0.00296944	0.562837	0.543346	0	0.56574	0.0170283	0.816815	0.726456
AT1G05030	-0.237898	-0.0284755	0.643002	-0.159714	-0.000581356	-0.00482122	0.000123535	5.04993e-107	1.03522e-07	0.879686	0.00324059	0.280358	6.63527e-107	1.5376e-06	0.948679	0.035599	0.494853
AT1G05055	-0.000332331	0.0129385	0.979888	0.00843707	0.00164784	-0.000121156	-0.000106437	0	0.443939	0.242537	0.840298	0.011294	0	0.693659	0.451791	0.958603	0.053436
AT1G05070	0.000150395	0.00116062	0.91672	0.00689969	0.00210796	-0.000222098	-8.59797e-05	0	0.447723	0.0698394	0.654173	0.0130721	0	0.696665	0.192449	0.874502	0.0600847
AT1G05087	-0.0180404	-0.073901	0.734051	0.00766935	0.0130216	-0.00086499	-0.000355532	1.40984e-67	0.859593	0.0189008	0.714585	0.0314666	1.74911e-67	0.950995	0.0727017	0.902012	0.114709
AT1G05170	-0.00250104	-0.0119756	0.968174	0.00987796	0.00058754	-0.000388872	-1.21184e-05	0	0.481466	0.743468	0.611466	0.820779	0	0.726037	0.872396	0.846109	0.913829
AT1G05180	0.00561613	0.0179811	0.934879	-0.0332369	0.00246057	0.00200343	-0.000171007	0	0.0129659	0.150509	0.00604464	0.000797846	0	0.0581977	0.32907	0.0572965	0.00632784
AT1G05190	-4.17031e-05	0.000305286	0.9992	-0.000244281	-1.54366e-05	1.06357e-05	-2.32388e-08	0	0.383476	0.66687	0.486722	0.982649	0	0.636862	0.822903	0.768301	0.999331
AT1G05200	0.0453551	0.201296	0.635649	0.0177854	-0.00329562	0.00132679	-0.000323176	2.32637e-47	0.693401	0.568009	0.589816	0.060216	2.78879e-47	0.862934	0.749894	0.83291	0.183673
AT1G05230	-0.00121081	-0.00910398	0.983675	-0.00363528	0.00097836	0.000139689	-2.45477e-05	0	0.646078	0.334054	0.746351	0.415965	0	0.838014	0.550387	0.917337	0.624851
AT1G05250	-0.00439538	-0.00204197	0.990914	-0.021265	0.000806184	0.000710838	-2.54828e-05	0	8.46692e-12	0.0429728	2.84833e-05	0.0317805	0	2.11344e-10	0.134736	0.000712956	0.115572
AT1G05270	-0.00958575	0.00062883	0.979678	0.00549388	0.00144231	-0.0010667	-4.7273e-05	0	0.164747	0.00436175	7.63358e-07	0.00171343	0	0.378429	0.0232059	3.20539e-05	0.0119385
AT1G05300	-0.0103773	0.00195703	0.97585	-0.00909806	-0.00106216	0.000493997	1.61874e-05	0	0.145118	0.183685	0.147027	0.496494	0	0.348012	0.375647	0.443946	0.690313
AT1G05310	-0.012673	-0.0437099	0.91803	0.0094714	0.00496707	-0.00105911	-8.11791e-05	0	0.610401	0.0367594	0.296329	0.251987	0	0.815737	0.120073	0.620267	0.46481
AT1G05320	0.004463	0.0144641	0.974955	0.0159804	0.00175664	-0.000715477	-0.00010471	0	0.0542252	0.0981383	0.11414	0.000936819	0	0.177705	0.245578	0.388797	0.00728223
AT1G05350	0.0430246	0.0228849	0.968528	-0.00420159	-0.000846757	0.00200797	-2.55741e-05	0	0.655704	0.482491	9.39375e-05	0.476533	0	0.844875	0.683428	0.00196765	0.67372
AT1G05360	0.00441848	-0.303576	0.346751	-0.0372284	0.0285411	0.00122751	-0.000407833	2.5642e-23	0.297817	4.41484e-10	0.529186	0.00277261	2.89762e-23	0.551295	1.4639e-08	0.798394	0.0177835
AT1G05410	0.00264572	-0.00207619	0.982625	0.00533654	-8.58871e-05	-0.00013847	9.9229e-06	0	0.324512	0.901367	0.639355	0.630827	0	0.578584	0.958769	0.865028	0.794623
AT1G05430	-0.000853325	0.000445417	0.998173	0.00111112	-2.09411e-05	-9.13461e-05	-3.04448e-07	0	0.356419	0.891941	0.164613	0.947151	0	0.612756	0.954234	0.470636	0.982263
AT1G05500	-0.00319868	-0.0215152	0.956635	-0.0162788	0.00384897	0.000615059	-9.46366e-05	0	0.00267408	2.86495e-08	0.0375506	4.66181e-06	0	0.015726	6.73938e-07	0.201695	7.61654e-05
AT1G05570	-0.00414913	0.0420441	0.952915	-0.0177557	-0.00439905	0.000615762	7.6182e-05	0	0.105613	0.00172651	0.303626	0.0685566	0	0.284826	0.0110345	0.62586	0.201061
AT1G05620	-0.0588829	0.0566789	1.00367	-0.0512608	-0.00545013	4.37676e-05	5.27404e-05	5.29219e-169	0.167736	0.25163	0.982775	0.709653	7.50207e-169	0.383044	0.463445	1	0.849239
AT1G05630	-0.00270999	0	1.00092	-0.000909088	-0.000114885	1.42918e-05	1.24277e-06	0	0.572932	0.577642	0.870949	0.83979	0	0.789869	0.756551	0.967257	0.922989
AT1G05670	0.166845	0.0133514	0.818341	0.237007	-0.00365393	-0.00998374	0.000262389	1.83713e-22	0.00575899	0.739671	0.0292454	0.421266	2.07158e-22	0.0296563	0.869757	0.171093	0.628821
AT1G05690	-0.0198926	-0.0247396	0.940915	-0.00983467	0.0056307	-0.000624085	-0.000169043	0	0.701906	0.0871839	0.668436	0.092799	0	0.868539	0.226034	0.878588	0.246577
AT1G05700	-0.265253	-0.298316	0.405642	-0.383019	0.0341817	0.00482236	-0.000768302	2.71668e-08	6.01711e-07	0.000772152	0.323975	0.0197647	2.92325e-08	7.99849e-06	0.00568269	0.645937	0.0817931
AT1G05710	-0.00117966	-0.0455012	0.914667	0.0111988	0.00405315	-0.000405137	-5.98869e-05	0	0.325505	0.00541329	0.514403	0.167819	0	0.579703	0.0275602	0.786467	0.361656
AT1G05767	0.00120094	0.000632768	0.999682	0.00012096	-3.10836e-06	3.89229e-05	-1.1192e-06	0	0.875909	0.974979	0.35701	0.704671	0	0.958349	0.997627	0.67714	0.846434
AT1G05785	-0.0790596	-0.137462	0.765431	-0.0441801	0.019885	-0.00196841	-0.000441135	3.28455e-206	0.0847009	1.3191e-09	0.159128	6.31031e-06	4.83059e-206	0.243757	3.97765e-08	0.4624	0.000100008
AT1G05790	-0.460126	0.042719	0.827967	-0.271961	0.00608292	-0.00875723	-0.000357868	2.24955e-211	2.94678e-23	0.0824303	4.52546e-09	0.000605311	3.32858e-211	1.7307e-21	0.217283	3.05758e-07	0.00503641
AT1G05805	-0.244523	-0.0023342	0.782252	-0.256139	-0.00586021	0.00149989	0.000235602	6.83756e-255	1.36669e-27	0.0516061	0.242677	0.00863182	1.04832e-254	9.59459e-26	0.154166	0.562768	0.0433812
AT1G05810	-0.00436836	-0.00176486	0.994605	0.00311138	0.000495112	-0.00047336	-1.26298e-05	0	0.178527	0.0942792	0.000175637	0.151998	0	0.399463	0.238915	0.0033297	0.339426
AT1G05830	0.0180914	0.0832551	0.344968	0.00534016	-0.0169076	0.00137428	0.000496002	5.87638e-22	0.884446	0.000322442	0.492971	0.000398481	6.61553e-22	0.963582	0.00273604	0.771636	0.00355276
AT1G05840	-0.000572228	-0.0504816	0.904784	0.000756665	0.0060055	5.98754e-06	-0.000119379	0	0.906043	2.44314e-13	0.986341	1.035e-06	0	0.973772	1.42559e-11	1	1.92956e-05
AT1G05850	0.000234667	-0.000539006	0.997948	0.000243717	0.000107906	-1.54713e-05	-2.59499e-06	0	0.531327	0.0302922	0.466365	0.0803905	0	0.76015	0.103816	0.755404	0.224205
AT1G05860	-0.000749256	-0.00252935	0.990605	-0.0176834	0.000563258	0.000757448	-1.19357e-05	0	0.0755613	0.658191	0.162938	0.753035	0	0.225804	0.816244	0.467933	0.876411
AT1G05870	0.000891587	-0.0369676	0.941635	0.00798014	0.00414695	-0.000211161	-8.81345e-05	0	0.172651	3.04099e-08	0.508319	7.78464e-05	0	0.391467	7.07936e-07	0.782117	0.000891119
AT1G05890	-0.031242	-0.15101	0.710451	0.0340317	0.00981898	-0.0026685	-5.85526e-05	0	0.00588568	5.27143e-10	7.54227e-05	0.213865	0	0.0301532	1.71007e-08	0.00163707	0.419879
AT1G05900	-0.0544872	-0.0271535	0.672725	0.0503512	0.00623256	0.000326901	-0.00038562	5.36221e-46	0.298932	0.314919	0.901619	0.036904	6.40755e-46	0.552375	0.533433	0.979997	0.129035
AT1G05910	0.000981535	-0.0046868	0.988341	0.000427111	8.40832e-05	0.00015444	2.20955e-06	0	0.858344	0.783599	0.23681	0.808617	0	0.950707	0.895058	0.555608	0.90655
AT1G05940	0.054225	-0.0393089	0.732547	0.0619783	4.8704e-05	2.99285e-05	8.72839e-05	0	0.00148277	0.984427	0.977558	0.240373	0	0.0094431	1	1	0.451598
AT1G05950	-0.352526	-0.173355	0.433007	-0.227755	0.019991	-0.005764	-0.000444702	6.38287e-09	0.00291101	0.0411166	0.167271	0.127309	6.88471e-09	0.0168655	0.13051	0.473525	0.304499
AT1G05970	0.000124606	-0.0209056	0.947979	0.0109655	0.00255813	-0.000505741	-4.56825e-05	0	0.208555	0.0218477	0.287716	0.169351	0	0.440648	0.0813946	0.611065	0.363393
AT1G06010	0.026259	0.0282667	0.0778495	0.028266	-0.003045	0.000182246	5.96704e-05	4.47546e-12	0.0143023	0.0391563	0.772196	0.174939	4.87709e-12	0.0628463	0.125753	0.928909	0.371302
AT1G06040	-0.00141729	-0.0314838	0.950675	0.0133667	0.00225376	-0.000434583	-2.93983e-05	0	0.000539495	5.10887e-06	0.0391861	0.0458884	0	0.00391908	7.38076e-05	0.206042	0.152216
AT1G06080	0.00219326	0.0444197	0.948867	-0.0286386	-0.000888701	0.00122437	-1.39169e-05	0	0.259437	0.78445	0.376827	0.885692	0	0.506364	0.895681	0.690741	0.947469
AT1G06110	-0.0265987	-0.00544701	0.897857	-0.0356538	0.00462346	7.22647e-06	-0.00016057	0	0.00107539	0.000918517	0.990307	0.000111924	0	0.00712642	0.00659249	1	0.00120449
AT1G06130	0.0220819	0.013617	0.986243	0.000442489	-0.000531669	0.000941521	-7.74528e-06	0	0.926827	0.388422	0.000341027	0.673252	0	0.981177	0.601682	0.00587062	0.826142
AT1G06180	-0.00465634	-0.0354569	0.863979	0.0334318	-0.00225502	-0.000584347	0.000143831	0	0.0147489	0.198589	0.434644	0.00592325	0	0.0644933	0.396208	0.732216	0.0323564
AT1G06190	-0.00385924	0.00252471	0.994465	0.00294128	0.000172799	-0.000259515	-1.32649e-05	0	0.155802	0.514566	0.0217033	0.0931256	0	0.365689	0.70799	0.140206	0.247143
AT1G06200	0.00367018	-0.00426548	0.960927	-0.000597293	0.00107963	0.000128079	-3.22851e-05	0	0.874982	0.0262303	0.536302	0.0256911	0	0.957801	0.0932011	0.804135	0.0991594
AT1G06210	0.00413964	0.0016218	0.986723	0.00621005	-0.00133763	-0.000130275	4.61982e-05	0	0.358769	0.122341	0.724168	0.0733094	0	0.615469	0.286141	0.908069	0.210803
AT1G06290	-0.0244083	-0.0137853	0.928306	0.0417708	-0.00144705	-0.00300964	8.02571e-05	0	0.0734816	0.627938	0.0180853	0.367001	0	0.221579	0.794069	0.124342	0.578574
AT1G06350	-0.00445215	0.0107319	0.977331	-0.0312188	-0.000638241	0.00110466	1.87947e-05	0	0.123287	0.805481	0.317512	0.807708	0	0.313591	0.906229	0.641016	0.906125
AT1G06360	0.00296	0.016073	0.9452	-0.0394239	0.00029412	0.00151424	-2.84694e-05	0	0.00333796	0.864121	0.0388067	0.578252	0	0.0188885	0.942088	0.204389	0.75471
AT1G06370	0.0698999	0.0472677	0.0871318	0.0731981	-0.00430361	7.75591e-06	8.586e-05	1.29654e-06	7.38274e-05	0.0685422	0.993858	0.222618	1.38468e-06	0.00067903	0.189797	1	0.429281
AT1G06460	-0.00356146	-0.022115	0.959903	-0.00927184	0.00355116	0.000231227	-8.25787e-05	0	4.23674e-05	1.55456e-34	0.0612642	1.11773e-21	0	0.000418367	8.18302e-32	0.271059	2.137e-19
AT1G06470	-0.13155	0.0430947	0.898712	0.0292335	0.0102181	-0.00841903	-0.000479671	0	0.175784	0.00021672	8.87188e-13	5.63302e-09	0	0.395738	0.00195903	1.07733e-10	1.8208e-07
AT1G06510	-0.021282	0.00733766	0.989596	-0.0077673	-0.00071855	6.63132e-05	-8.27029e-06	0	0.386824	0.531491	0.892273	0.809004	0	0.639323	0.720142	0.977552	0.90655
AT1G06560	-0.0144895	0.0524284	0.965388	-0.0256581	-0.00137991	0.00146261	-0.000118785	0	0.191378	0.582871	0.172199	0.112589	0	0.417005	0.760521	0.474948	0.28119
AT1G06570	-0.00576024	-0.00480175	0.715487	0.0100467	0.000615433	-0.00105011	-1.37718e-05	0	0.409965	0.693212	0.11442	0.767016	0	0.661442	0.839577	0.38915	0.88172
AT1G06590	-0.0551675	0.037266	0.754241	0.11063	0.00190144	-0.00825356	-0.000117063	4.61424e-45	0.0440116	0.786735	0.00588395	0.576142	5.50426e-45	0.15314	0.89647	0.0560097	0.753049
AT1G06620	-0.069798	0.0123137	0.943738	-0.152861	-0.00523788	0.00402039	0.000149601	0	5.33043e-19	0.0170787	1.76093e-05	0.0222418	0	2.44384e-17	0.0672521	0.00048243	0.0885927
AT1G06630	-0.00489079	-0.0841741	0.319272	0.0280752	0.000246445	-0.00132961	0.000191812	6.07804e-30	0.329879	0.946701	0.397642	0.0807683	7.00132e-30	0.583867	0.984157	0.703665	0.224771
AT1G06640	0.050743	-0.030908	0.495835	0.0306422	-0.00086608	0.00017734	0.00013197	3.34866e-137	0.133127	0.740049	0.87341	0.0897388	4.56063e-137	0.329508	0.869759	0.968468	0.240714
AT1G06645	-0.107914	0.178453	0.802113	-0.109309	-0.00155211	0.00252646	-0.00041959	1.81887e-20	0.215675	0.891787	0.600674	0.217542	2.03845e-20	0.447898	0.954227	0.839956	0.424227
AT1G06650	-0.00687448	-0.0892455	0.846909	0.0275918	0.00648439	-0.00114337	-6.85416e-05	0	0.00271996	3.66173e-08	0.0227847	0.0507662	0	0.0159436	8.35134e-07	0.144437	0.163215
AT1G06670	-0.19176	-0.00023227	0.908184	0.0200114	0.00231724	-0.00914891	-9.36399e-05	1.00974e-166	0.554464	0.592669	7.28972e-07	0.468115	1.42689e-166	0.777288	0.767727	3.10438e-05	0.666214
AT1G06680	-0.00183262	0.000298808	0.997213	-0.000922917	-5.14043e-05	-2.8947e-05	6.24712e-07	0	0.0215382	0.317029	0.186363	0.683191	0	0.0869074	0.535392	0.492001	0.83281
AT1G06690	0.014698	0.032968	0.976699	-0.00339832	0.00273224	0.000656875	-0.000188941	0	0.811871	0.134732	0.399053	0.000517861	0	0.928059	0.30581	0.704807	0.0043984
AT1G06700	-0.00582246	-0.00686397	0.982875	-0.00307221	0.000397727	-6.30041e-05	-3.46706e-06	0	0.28637	0.280692	0.688591	0.752299	0	0.539255	0.496319	0.890149	0.876122
AT1G06720	0.00131691	0.00101957	0.999718	0.000475625	3.64165e-07	-1.15152e-05	-7.31219e-07	0	0.584595	0.99739	0.808306	0.825503	0	0.79799	1	0.945144	0.9165
AT1G06770	-0.00366658	-0.0510015	0.873426	0.0186823	0.00344784	-0.00055628	-3.40313e-05	0	0.261966	0.105642	0.54037	0.591944	0	0.508759	0.258664	0.807008	0.765134
AT1G06780	-0.0154446	-0.00594253	0.953889	-0.00702222	0.000310385	0.000135795	-1.57453e-05	0	0.487826	0.810579	0.805743	0.683226	0	0.728536	0.9098	0.943991	0.83281
AT1G06790	-0.164204	0.0118882	0.850038	-0.00786572	0.0105751	-0.00946245	-0.000382948	2.88561e-118	0.834807	0.0284208	4.25324e-06	0.00773679	3.83978e-118	0.940164	0.0988349	0.000141424	0.0396141
AT1G06800	0.00916892	-4.73194e-05	0.951674	0.00316294	-8.1458e-06	-0.000170031	1.6016e-05	0	0.710436	0.994037	0.714481	0.6219	0	0.873082	1	0.902012	0.788487
AT1G06820	-0.134299	0.0869273	0.825074	-0.0811858	-0.00585057	-0.00352543	6.58524e-05	8.62607e-185	0.00542556	0.117301	0.0268759	0.554083	1.24261e-184	0.0281772	0.278943	0.162017	0.735449
AT1G06850	-0.0461803	-0.0844624	0.719936	0.070161	0.0123	-0.00250178	-0.000368961	1.5786e-95	0.0488411	0.00694736	0.197882	0.00657643	2.04281e-95	0.164871	0.0337679	0.509503	0.0351109
AT1G06870	-0.0280667	-0.103001	0.790265	-0.131197	0.0164844	0.00441295	-0.000374261	0	2.4291e-12	5.9175e-12	1.55712e-05	1.57374e-07	0	6.5344e-11	2.79867e-10	0.000434542	3.62607e-06
AT1G06900	-0.113397	-0.00285411	0.919556	-0.192769	0.00413431	0.00444574	-0.000181167	2.73299e-256	2.79404e-12	0.241456	0.00313674	0.0849407	4.19447e-256	7.42817e-11	0.450547	0.0347984	0.232002
AT1G06910	-0.0291745	0.0213413	0.980672	-0.00976847	-0.00271526	-0.000128113	4.98349e-05	0	0.495565	0.138721	0.869865	0.361765	0	0.734236	0.311906	0.966564	0.57364
AT1G06950	-0.00178682	0.00584825	0.980241	0.0021779	0.000875715	-0.000284574	-5.30049e-05	0	0.598507	0.09796	0.207256	0.000774804	0	0.807656	0.245405	0.522121	0.00617233
AT1G06960	-0.244821	0.200368	0.735728	-0.267871	0.00769925	0.00190943	-0.000794316	7.68506e-106	8.85448e-15	0.0814882	0.310945	1.61845e-09	1.00903e-105	2.99122e-13	0.215622	0.634026	5.72575e-08
AT1G07010	-0.0709542	0.0748981	0.674496	-0.0881489	-0.011705	0.00125564	0.00029456	1.50812e-284	4.38871e-06	1.87963e-06	0.23052	5.6898e-05	2.36056e-284	5.17545e-05	3.12206e-05	0.546991	0.000680806
AT1G07040	0.00190165	-0.0228522	0.943896	0.0124391	0.00272701	-0.000451902	-5.3875e-05	0	0.00364345	6.29262e-07	0.0528465	0.000955432	0	0.0201959	1.16589e-05	0.248378	0.00739493
AT1G07080	0.00358404	-0.0388064	0.92949	0.00600569	0.00347874	-0.000138576	-4.75164e-05	0	0.160044	2.00921e-10	0.552365	0.00354698	0	0.372002	7.05265e-09	0.811492	0.0216972
AT1G07110	-0.0128918	0.0619659	0.858901	-0.00892626	0.0115226	-0.000562644	-0.000632407	0	0.33771	3.93588e-22	0.267999	5.17996e-71	0	0.592014	7.21792e-20	0.590109	2.32735e-67
AT1G07140	-0.180135	0.00780418	0.985504	-0.081488	0.00144736	-0.00504772	-5.52265e-05	0	1.43631e-16	0.251408	6.54749e-21	0.141892	0	5.58732e-15	0.463132	2.26291e-18	0.324025
AT1G07150	0	0						1	1	1	1	1	1	1	1	1	1
AT1G07200	0.00194678	-0.0516112	0.66444	0.092833	-0.00284079	-0.0051582	0.000268412	7.46537e-59	0.0275964	0.598257	0.0248481	0.0947462	9.12209e-59	0.106613	0.771408	0.153777	0.250474
AT1G07220	0.0589995	0.0247035	0.777922	0.0948188	-0.00461702	-0.00226314	0.000175355	1.46377e-155	0.00159441	0.229561	0.167223	0.12564	2.03708e-155	0.0100604	0.435655	0.473525	0.302519
AT1G07230	-0.00290023	-0.0144157	0.977121	0.00760742	0.00101619	-0.000411258	-9.32028e-06	0	0.000746506	0.00043077	0.000833738	0.278506	0	0.00520008	0.00349044	0.0120838	0.492682
AT1G07270	0.0106107	-0.180158	0.674413	-0.00650884	0.0163595	0.000297069	-0.000239007	1.37974e-92	0.848728	6.49533e-05	0.866248	0.0436024	1.77805e-92	0.94663	0.000688182	0.965586	0.146526
AT1G07280	-0.00140531	-0.0165838	0.958371	0.0023668	0.00179918	-1.39273e-05	-3.70995e-05	0	0.453295	8.35864e-06	0.935529	0.00204481	0	0.700724	0.000113804	0.989218	0.0138992
AT1G07290	0.00862294	0.0324587	0.0898804	-0.0254681	0.00159118	0.00113118	-0.000126159	0.0245652	0.534845	0.764345	0.624907	0.43073	0.0255578	0.762821	0.884192	0.856008	0.637813
AT1G07320	0.00115686	-0.011024	0.954266	0.00078621	0.000300681	-3.65595e-05	1.50202e-05	0	0.755185	0.351304	0.790409	0.118134	0	0.896327	0.566932	0.9389	0.289963
AT1G07350	0.0037055	0.230374	0.691929	0.102045	-0.0368959	-0.00586986	0.00104522	2.33133e-42	0.0499071	3.00501e-08	0.0386939	1.37656e-07	2.76668e-42	0.167088	7.01377e-07	0.204389	3.22971e-06
AT1G07360	-0.00369625	-0.000311852	0.997994	-0.00334008	-0.000218387	0.000253136	-6.17554e-08	0	0.0994001	0.399743	0.0220741	0.993623	0	0.274004	0.612672	0.141583	1
AT1G07390	0.0869818	-0.381906	0.215478	0.20138	0.053273	-0.0050106	-0.00127597	1.19188e-12	9.56245e-11	7.35909e-41	0.00315173	5.31946e-27	1.30247e-12	2.13752e-09	8.2661e-38	0.0349216	2.07829e-24
AT1G07420	0.0314277	0.0370362	0.884349	0.0264044	0.000429644	0.000787885	-8.87724e-05	0	0.165585	0.860027	0.448226	0.221395	0	0.379676	0.939485	0.744079	0.427932
AT1G07440	0.0128539	0.00933535	0.918324	-0.0381459	-0.00104776	0.00179288	2.7994e-05	0	0.00382402	0.53464	0.0127082	0.577664	0	0.0209656	0.722664	0.0986151	0.754271
AT1G07470	0.000128121	-0.00176099	0.987734	0.00015258	0.000358697	8.78716e-05	-1.17777e-05	0	0.960288	0.360232	0.59914	0.313338	0	0.99478	0.574895	0.839092	0.52629
AT1G07480	-0.00623819	-0.0267665	0.909452	-0.000607075	0.00313464	-0.00126584	-4.02682e-05	0	0.971535	0.149837	0.172616	0.534672	0	0.99882	0.32832	0.475661	0.719754
AT1G07520	0.00793199	0.0902445	0.912099	0.0186407	-0.00610847	-1.1302e-05	1.38696e-05	1.24354e-92	0.684243	0.297584	0.996394	0.936733	1.60276e-92	0.857787	0.514545	1	0.976053
AT1G07560	-0.206336	-0.0351151	0.704806	-0.194202	0.00820031	0.00419632	-0.000309139	3.59446e-12	0.0576612	0.541715	0.504832	0.437457	3.91893e-12	0.185914	0.728591	0.78063	0.642529
AT1G07570	-0.0252293	-0.0344298	0.9346	-0.00269784	-0.000125157	-0.000478007	5.9544e-05	0	0.788321	0.922444	0.383206	0.120068	0	0.914324	0.971872	0.693659	0.292631
AT1G07615	-0.00544688	-0.00291532	0.962537	-0.00556128	0.000826162	0.00116255	-8.26016e-05	0	0.740824	0.700937	0.205004	0.19749	0	0.88891	0.842667	0.519497	0.400042
AT1G07640	0.00121151	0.00400739	0.952446	0.0249588	-0.00197083	-0.00117249	6.56866e-05	0	0.000240093	0.0234105	0.00156429	0.0112291	0	0.00191947	0.085457	0.0201386	0.0532092
AT1G07650	0.024144	-0.0682301	0.880679	0.0380327	0.00257021	-0.000970088	5.88853e-05	0	0.0476795	0.295583	0.354529	0.421247	0	0.162229	0.512525	0.674528	0.628821
AT1G07660	-0.000510881	0	0.999868	0.00028716	2.39099e-05	-3.989e-05	-7.47185e-07	0	0.57372	0.714272	0.152	0.700983	0	0.790287	0.852045	0.451301	0.844148
AT1G07705	-0.00589798	-0.0812098	0.758894	0.0201786	0.00827245	-0.000942929	-0.000129594	0	0.302327	0.000949482	0.376964	0.0822596	0	0.555223	0.00676745	0.690741	0.227371
AT1G07745	0.204522	0.202185	0.375455	0.0348194	-0.00982098	0.00775646	-2.95812e-05	6.63168e-06	0.683817	0.369277	0.0963193	0.927682	7.0632e-06	0.857675	0.582981	0.354012	0.971353
AT1G07780	0.0141789	-0.0717227	0.807832	0.0550388	0.00725274	-0.00235786	-0.000143041	0	0.00379941	0.00287237	0.0230354	0.0484687	0	0.0208817	0.0166309	0.145681	0.157976
AT1G07830	-0.00326987	-0.023457	0.941171	0.01247	0.00077999	-0.000588641	2.26397e-05	0	0.0379089	0.310174	0.0724673	0.322845	0	0.136587	0.528615	0.29995	0.536394
AT1G07840	-0.0421986	0.0137409	0.642194	-0.073541	-0.00960035	0.00325309	0.00023236	1.38012e-71	0.0458145	0.0415776	0.105376	0.0978717	1.72391e-71	0.157614	0.131401	0.370177	0.255661
AT1G07870	-0.00471164	-0.00479521	5.44597e-05	-0.000760718	9.81419e-05	-3.92845e-05	2.32243e-06	0.980864	0.743986	0.741919	0.757215	0.793674	0.991345	0.890256	0.870978	0.921753	0.897665
AT1G07880	0.0367012	-0.0374209	0.658324	0.0805162	-0.0141457	-0.00335853	0.000667659	7.27413e-12	0.461044	0.278267	0.555186	0.0880441	7.91998e-12	0.708074	0.49377	0.812397	0.237743
AT1G07910	-0.410949	-0.0122479	0.840557	-0.386043	-0.00153615	0.00203155	-5.27572e-05	7.85463e-77	9.95625e-17	0.796167	0.423041	0.765902	9.88955e-77	3.9763e-15	0.901848	0.724085	0.881003
AT1G07950	0.0120927	-0.0810518	0.850495	0.0289423	0.00349906	-0.000759818	3.93783e-05	0	0.0173294	0.0245359	0.252152	0.395704	0	0.0733353	0.0886973	0.573498	0.607102
AT1G07960	0.0156504	0.00370005	0.983738	0.00910897	-0.000376729	0.000213188	1.02447e-05	0	0.0819332	0.573891	0.455493	0.607794	0	0.239224	0.753504	0.749101	0.777526
AT1G07980	-0.0402836	-0.0386024	0.900036	-0.0734573	0.00354209	0.00143578	-5.3755e-05	0	8.19863e-10	0.020641	0.0277918	0.238457	0	1.61563e-08	0.0778674	0.164952	0.449263
AT1G07990	-0.0371471	-0.00785624	0.870367	-0.0344073	0.00234138	-0.00103037	-2.65162e-05	0	0.10783	0.392403	0.377408	0.745122	0	0.288811	0.605657	0.690741	0.87145
AT1G08030	-0.0363851	0.0823922	0.932527	-0.0153908	-0.00944438	0.00105542	0.000140343	0	0.537811	0.00312573	0.438654	0.140538	0	0.764956	0.0177099	0.736086	0.322163
AT1G08040	-0.00875582	-0.00409773	0.938456	-0.0334732	0.00120247	0.000575444	-1.03344e-05	0	0.0697311	0.610588	0.567649	0.883223	0	0.213712	0.779768	0.819553	0.9467
AT1G08060	0.0107196	-0.0263384	0.92327	0.0108822	0.00315652	0.000111361	-8.10186e-05	0	0.534057	0.158609	0.907144	0.224587	0	0.762599	0.341707	0.981748	0.431821
AT1G08110	-0.0023484	-0.000506456	0.992641	0.00220992	-0.000284106	-8.61636e-05	9.71153e-06	0	0.236384	0.234128	0.397416	0.172261	0	0.474564	0.441434	0.703607	0.367593
AT1G08125	-0.118716	0.0126179	0.84468	-0.0299804	-0.00232612	-0.00426415	8.9187e-05	2.46763e-270	0.224232	0.461104	0.0015318	0.342916	3.82841e-270	0.457944	0.66755	0.019834	0.554445
AT1G08130	-0.00863166	-0.0256957	0.955358	-0.0153919	0.00270725	0.00119676	-7.87852e-05	0	0.204683	0.0812247	0.0706616	0.0885676	0	0.435712	0.215352	0.295085	0.238784
AT1G08190	-0.00365578	0.00367885	0.989795	0.00149421	-0.000377118	-0.000147057	5.1905e-06	0	0.769968	0.564045	0.597826	0.789883	0	0.90479	0.747017	0.838337	0.895127
AT1G08200	0.00135153	0.000580812	0.998093	-0.000237422	0.000149779	7.81326e-05	-8.1032e-06	0	0.685221	0.0456396	0.0144779	0.000284398	0	0.858293	0.14074	0.107819	0.00266486
AT1G08210	-0.00922847	0.0512476	0.947014	0.0093985	0.000289702	-0.00117296	-0.000110544	0	0.538995	0.882337	0.159905	0.0580319	0	0.765773	0.949675	0.463667	0.179571
AT1G08220	-0.221782	0.0281443	0.875123	-0.173522	0.000303929	0.00026609	-0.00015432	1.16106e-92	7.93639e-05	0.956915	0.911675	0.357234	1.49666e-92	0.000721096	0.989282	0.982999	0.569369
AT1G08230	0.0727027	0.195853	0.682176	-0.0133321	-0.00291346	0.00465192	-0.000354155	1.73617e-198	0.566914	0.32806	0.000249941	6.60508e-05	2.53184e-198	0.786277	0.546321	0.00450999	0.000774847
AT1G08260	-0.00847589	-0.0458362	0.218978	-0.0290245	0.000447012	0.00251623	7.06377e-05	6.22191e-20	0.237589	0.887535	0.0646582	0.453713	6.96699e-20	0.476457	0.951978	0.27947	0.655529
AT1G08300	-0.0739106	0.187161	0.388058	-0.138897	-0.0170186	0.0034939	0.000259299	2.32227e-15	0.00570598	0.00811572	0.202467	0.175841	2.56332e-15	0.0294339	0.038161	0.516719	0.372402
AT1G08320	-0.0284675	0.0268913	0.975563	-0.0109138	-0.00305727	-0.00045437	5.47071e-05	0	0.336789	0.0354589	0.46355	0.206581	0	0.591138	0.117016	0.754167	0.41124
AT1G08350	-0.166919	-0.0088925	0.897456	-0.00347925	0.00877859	-0.00991142	-0.000295616	6.31512e-190	0.911551	0.0284772	6.61179e-09	0.0132924	9.13959e-190	0.976427	0.0989926	4.36864e-07	0.0610036
AT1G08360	-0.00308503	-0.00336522	0.994249	-0.00382932	0.00031505	5.82326e-05	-5.43025e-06	0	5.21721e-07	0.00125126	0.161871	0.0619425	0	7.01824e-06	0.00846675	0.466658	0.187161
AT1G08380	-0.000510095	0.00113443	1.00001	-0.000183791	-4.75478e-05	-1.8591e-05	-5.15542e-07	0	0.263085	0.0236387	0.0379816	0.410233	0	0.509943	0.0862083	0.202842	0.620181
AT1G08390	0.00230902	-0.0586287	0.808103	-0.0176126	0.00622395	0.00344685	-0.000230961	1.11165e-68	0.709825	0.304076	0.18194	0.200556	1.38127e-68	0.872809	0.520462	0.486292	0.403628
AT1G08400	0.154748	0.0918133	0.549187	0.218394	-0.010716	-0.00564599	0.000313266	5.10525e-22	0.000184675	0.151573	0.0764124	0.159445	5.74885e-22	0.00153089	0.330752	0.30902	0.349968
AT1G08420	-0.00662795	-0.00716679	0.969729	-0.00410231	-0.000949239	-0.000230989	5.97445e-05	0	0.55775	0.289071	0.545167	0.025127	0	0.779947	0.506157	0.809707	0.0972819
AT1G08430	0.001423	0.00219671	0.995244	-0.000929741	-0.00100304	3.50739e-05	3.79089e-05	0	0.881701	0.209541	0.918039	0.111457	0	0.961854	0.409584	0.985406	0.279452
AT1G08460	-0.000823801	0.00144127	0.957039	0.00193769	-0.00176257	-0.000191123	7.00194e-05	0	0.691291	0.00475342	0.47278	0.00016708	0	0.861931	0.0247475	0.758363	0.00170806
AT1G08465	0.00185384	-0.0174377	0.961027	0.00699879	0.00138935	-0.00028987	-1.06842e-05	0	0.136729	0.0209491	0.258588	0.551235	0	0.335422	0.0789632	0.580482	0.733076
AT1G08470	-0.0031943	-0.0136788	0.963719	0.000168741	0.000722906	0.000108759	-2.07059e-06	0	0.971588	0.233012	0.673903	0.908724	0	0.99882	0.439976	0.881441	0.959779
AT1G08480	-0.0101273	-0.00234425	0.968449	-0.0107161	-0.000582362	-1.5503e-05	2.69683e-05	0	0.00281377	0.204469	0.936857	0.0485914	0	0.0163866	0.403726	0.989218	0.158261
AT1G08490	0.00896415	0.0618931	0.948837	-0.0098251	-0.00082021	0.00138144	-0.000129644	0	0.515826	0.671576	0.0939904	0.0245003	0	0.748363	0.825897	0.348719	0.095514
AT1G08500	-0.0201165	0.00836862	0.0568947	-0.0243728	-0.00243619	0.00010333	9.76513e-05	0.000180675	0.117903	0.221857	0.903284	0.1003	0.000191118	0.305518	0.426	0.980659	0.260083
AT1G08510	-0.0484712	0.0197259	0.951478	0.018523	0.00808108	-0.00445876	-0.000338419	0	0.0762531	1.49121e-09	5.1788e-15	1.95063e-17	0	0.227116	4.45182e-08	8.94936e-13	2.3687e-15
AT1G08530	-0.0244864	-0.00516833	0.943436	-0.0319894	0.00372697	-0.000229014	-0.000108864	0	0.0212476	0.0359345	0.762431	0.0397422	0	0.0860826	0.118065	0.924464	0.136881
AT1G08550	-0.00772587	-0.0533294	0.923508	0.00894758	0.00638173	-0.00058	-0.000138915	0	0.486879	0.000106198	0.408726	0.00463111	0	0.727606	0.00105098	0.713213	0.0266935
AT1G08570	-0.00590635	-0.0214752	0.953196	-0.00914683	0.00272315	0.00038634	-6.76412e-05	0	0.0907014	8.26652e-05	0.190274	0.00103178	0	0.255916	0.000850892	0.497615	0.00789073
AT1G08580	-0.00445032	-0.0159921	0.973303	0.00454989	0.00166835	-0.000236093	-3.56792e-05	0	0.116684	6.91426e-06	0.135642	0.00124995	0	0.303693	9.61789e-05	0.426779	0.00930576
AT1G08630	-0.000103612	-2.73907e-05	0.999782	0.000440346	-5.8612e-05	-1.42149e-05	2.10964e-06	0	0.224293	0.206148	0.472106	0.126713	0	0.457957	0.405349	0.757967	0.303973
AT1G08640	-0.40725	0.0123934	0.907272	-0.217252	0.00199451	-0.00800314	-0.000109899	0	6.61476e-35	0.376468	8.59609e-17	0.101934	0	6.25763e-33	0.58926	1.75556e-14	0.262608
AT1G08660	0.0147438	-0.126443	0.471287	0.394611	-0.0016931	-0.0192587	0.000473458	2.71449e-13	2.45489e-09	0.841466	9.51487e-08	0.0604871	2.97396e-13	4.59576e-08	0.928692	4.80341e-06	0.184187
AT1G08670	-0.0485754	0.0172576	0.987648	0.00620156	-0.0048535	-0.0020696	0.000150531	0	0.695095	0.0165038	0.0165007	0.0125713	0	0.863829	0.0655919	0.117035	0.058138
AT1G08680	0.000244618	-0.00123766	0.994555	0.00175582	0.000284215	3.40649e-05	-1.34131e-05	0	0.458818	0.348632	0.792206	0.137674	0	0.706224	0.564739	0.939384	0.317948
AT1G08710	-0.00757329	-0.0280971	0.92823	0.0408046	0.000683496	-0.00205124	4.75764e-05	0	0.0010667	0.668345	0.00256716	0.316896	0	0.00709499	0.823721	0.0298428	0.530384
AT1G08750	0.0525064	0.103956	0.933229	0.0119173	0.00226532	0.000349405	-0.000304621	2.76505e-306	0.641463	0.489038	0.802389	0.00179413	4.38834e-306	0.834905	0.688672	0.942775	0.012373
AT1G08760	-0.11329	-0.00518964	0.88212	-0.00395784	0.0107559	-0.00670142	-0.000363344	0	0.826309	3.14539e-06	9.71625e-12	1.26043e-07	0	0.935615	4.90703e-05	1.01524e-09	3.01229e-06
AT1G08780	-0.012549	-0.00752803	0.948585	-0.015916	0.000979717	0.000407642	-2.76855e-05	0	3.22175e-05	0.0454881	0.0509733	0.0578366	0	0.000326757	0.140418	0.243512	0.179158
AT1G08800	-0.000690482	0.00567277	0.991522	0.00220696	0.000329727	-0.000130707	-2.64752e-05	0	0.740317	0.698734	0.718991	0.296957	0	0.888893	0.84144	0.904733	0.511983
AT1G08810	-0.0743099	-0.107118	0.71174	-0.101697	0.00501195	0.00189355	3.01445e-05	5.01306e-157	0.000200479	0.152049	0.204407	0.772483	6.98951e-157	0.00164671	0.331469	0.519195	0.885852
AT1G08840	0.0333936	-0.0203061	0.125408	0.0586921	0.0126922	-0.00525656	-0.000384075	0.0712066	0.427302	0.176406	0.247539	0.203248	0.0737764	0.678398	0.366686	0.567648	0.407493
AT1G08890	-0.141687	-0.127506	0.574726	-0.123854	0.0340025	-0.00228123	-0.000990922	1.24647e-54	0.0010765	2.28006e-12	0.269625	6.7716e-12	1.51177e-54	0.00712856	1.14462e-10	0.59166	3.54827e-10
AT1G08900	-0.570691	-0.070793	0.731467	-0.581142	0.0109499	-0.00107624	-0.000236656	1.31364e-212	2.5061e-128	0.000386395	0.413293	0.01004	1.94534e-212	2.81498e-125	0.00318545	0.716407	0.0485861
AT1G08910	0	0						1	1	1	1	1	1	1	1	1	1
AT1G08960	0.017695	0.0650493	0.976521	0.00540491	0.0014964	-0.000178206	-0.000183993	0	0.675827	0.365525	0.80048	0.000188344	0	0.853667	0.580219	0.942446	0.00188679
AT1G08970	0.0240464	0.0416399	0.930871	-0.000758899	-0.00252341	0.000852803	7.24002e-06	0	0.93368	0.0305649	0.0865096	0.835031	0	0.98312	0.104477	0.332405	0.920181
AT1G08980	-0.0146327	-0.00104222	1.00207	-0.00970954	-0.000515811	-3.32498e-05	1.70351e-05	0	1.56309e-05	0.072878	0.786278	0.0468068	0	0.000167612	0.198932	0.936834	0.154125
AT1G08990	-0.201103	-0.00763939	0.859921	-0.167585	-0.0109166	0.000293429	0.000366036	5.52842e-118	1.15076e-05	0.025518	0.888034	0.011957	7.35323e-118	0.000127036	0.0912474	0.975637	0.0559029
AT1G09010	-0.270645	-0.0414872	0.831096	-0.0334982	0.0161736	-0.0142561	-0.000452606	0	0.118366	3.78409e-09	3.85031e-34	3.11099e-08	0	0.306083	1.0495e-07	5.76649e-31	8.52299e-07
AT1G09020	0	-0.003428	0.996117	0.00401515	-8.53719e-05	-0.000112926	7.17838e-06	0	0.129403	0.801027	0.434334	0.476962	0	0.323363	0.90348	0.732171	0.67379
AT1G09023	0.000113754	0.0871606	0.152406	-0.061443	-0.00524147	0.00179849	3.55469e-05	6.12341e-30	7.93726e-06	0.00289827	0.0165449	0.497834	7.05177e-30	8.9716e-05	0.0167162	0.117157	0.691115
AT1G09040	-0.0226108	-0.0647812	0.87966	0.0150407	0.00864268	-0.00157531	-0.000177056	1.17743e-229	0.589714	0.0154386	0.300537	0.095871	1.77196e-229	0.801811	0.0621279	0.623534	0.252121
AT1G09060	-0.0170013	0.0016747	0.991055	-0.0316761	-0.000725719	0.000649147	2.38597e-05	0	1.13328e-07	0.342223	0.0463256	0.294632	0	1.66671e-06	0.558291	0.230883	0.509931
AT1G09090	-0.133368	0.00534627	0.813871	-0.223333	0.00494454	0.00314398	-0.000169028	3.42677e-47	0.000113692	0.504234	0.319305	0.443547	4.10518e-47	0.000996118	0.699452	0.643192	0.647318
AT1G09100	-0.00023972	-0.00574901	0.972297	-0.00349646	0.00156774	0.000107577	-4.3229e-05	0	0.408864	0.00379887	0.641369	0.00739339	0	0.660444	0.0207266	0.866026	0.0382938
AT1G09130	0.000833321	-0.000163639	0.00168329	-0.000750819	-9.43209e-05	9.48264e-05	3.29228e-06	0.105855	0.482	0.489972	0.103588	0.418667	0.109423	0.726476	0.689135	0.367551	0.627233
AT1G09140	-0.0719183	0.261742	0.737809	-0.0703528	-0.0359647	0.00218983	0.000835458	7.57336e-108	0.0403208	2.55217e-16	0.242042	1.68693e-10	9.95963e-108	0.14321	2.31655e-14	0.562391	6.9218e-09
AT1G09170	-0.0578534	-0.112544	0.80532	-0.10091	0.00492338	0.00264906	-7.25196e-05	4.87646e-58	0.0497931	0.456771	0.352729	0.713252	5.94733e-58	0.166893	0.663444	0.67333	0.851167
AT1G09195	-0.0501612	0.131171	0.753292	0.00323487	0.0252733	-0.00231443	-0.00145278	6.41957e-130	0.919143	5.68523e-10	0.183086	5.81274e-33	8.66811e-130	0.979649	1.83109e-08	0.488048	3.73095e-30
AT1G09230	0.0146889	-0.00683891	0.594097	0.0494925	-0.0108892	-0.000467102	0.000438405	6.60657e-129	0.0498218	0.000743269	0.734358	5.16881e-06	8.90989e-129	0.166927	0.00550166	0.912969	8.38392e-05
AT1G09270	-0.00428893	0.00464275	0.99935	-0.000369503	-0.000688181	-3.46637e-05	1.74545e-05	0	0.910971	0.103593	0.847527	0.165887	0	0.976266	0.255248	0.960952	0.358982
AT1G09280	-0.0862314	-0.064119	0.693273	-0.0835522	0.00892235	0.00036331	-0.000203503	1.45067e-207	0.000304154	0.00257343	0.773442	0.0210204	2.13771e-207	0.00236635	0.0152438	0.929211	0.0850909
AT1G09290	0.00772762	-0.0468274	0.883999	0.0120863	0.00551054	-0.000243924	-0.000126643	0	0.365675	0.00126571	0.737891	0.0129023	0	0.622104	0.00855166	0.914325	0.0594871
AT1G09300	-0.00162289	0.00254824	0.968944	-0.00143118	0.000480367	0.000460826	-5.14935e-05	0	0.88911	0.714526	0.41054	0.18818	0	0.966206	0.852234	0.714107	0.388374
AT1G09320	-0.0135577	-0.0775212	0.894267	0.0864948	0.00503404	-0.00378851	-6.23442e-05	0	4.54799e-10	0.00457079	5.58359e-07	0.238516	0	9.22533e-09	0.0240194	2.49622e-05	0.449263
AT1G09330	-0.00454698	0.000943065	0.995292	-0.00137154	4.12448e-05	-0.000179957	-2.5783e-06	0	0.401207	0.843583	0.0434878	0.678898	0	0.654428	0.929545	0.221433	0.829956
AT1G09340	-0.00023421	-0.000298493	0.99799	0.000702234	0.0001292	-7.45948e-05	-3.60558e-06	0	0.0764925	0.0108543	0.000562301	0.0170386	0	0.227453	0.0475791	0.00877775	0.0732487
AT1G09390	-0.00865104	0.0081568	0.981673	-0.0180126	-0.00171447	0.000757599	4.77734e-05	0	0.0324493	0.11157	0.0991561	0.136734	0	0.121445	0.268785	0.358991	0.316428
AT1G09430	-0.0396121	-0.0158938	0.970479	-0.0396468	0.0016453	-4.22946e-05	-3.18827e-05	0	9.65522e-48	2.49872e-06	0.776529	0.00219807	0	1.57749e-45	4.0384e-05	0.930383	0.0146854
AT1G09440	-0.215962	-0.0578473	0.861856	-0.184398	-0.000744435	0.000909506	9.53464e-05	1.23685e-123	8.14468e-07	0.876331	0.655674	0.503526	1.65688e-123	1.0607e-05	0.947961	0.874817	0.695789
AT1G09460	-0.0034185	-0.00621465	0.977839	-0.00542318	-8.28108e-05	8.41386e-05	1.9705e-05	0	0.451542	0.928405	0.830469	0.473022	0	0.699579	0.974608	0.954584	0.670649
AT1G09480	-0.010495	0.000833731	0.974503	0.0103881	-0.000219943	-0.000188735	-1.44525e-05	0	0.294439	0.862257	0.726967	0.701991	0	0.549042	0.940663	0.909597	0.844703
AT1G09490	0.0255463	0.0184944	0.949609	0.0177257	-0.000752318	0.000189087	-1.52488e-06	0	0.0149388	0.419443	0.63414	0.956199	0	0.065058	0.62955	0.861778	0.986159
AT1G09500	0.00339871	-0.32388	0.289882	0.0254646	0.0294689	-0.000627073	-0.000544597	0.0167942	0.83987	0.0651377	0.92989	0.263981	0.0175012	0.942832	0.183075	0.988263	0.477497
AT1G09540	0.124455	-0.00388226	0.848631	0.0504947	0.00314132	-0.000764037	-2.16268e-05	2.55706e-61	0.331432	0.645654	0.78474	0.915636	3.13519e-61	0.584902	0.807857	0.935621	0.964133
AT1G09570	0.00318181	0.00490351	0.98869	0.00263948	9.10294e-05	-3.89704e-05	-1.19153e-05	0	0.110024	0.666631	0.665378	0.0584324	0	0.293028	0.822903	0.876504	0.180252
AT1G09580	0.00818794	-0.0334349	0.93008	0.0233349	0.0037087	-0.00110718	-5.37122e-05	0	0.0457504	0.0130795	0.0823096	0.22773	0	0.157542	0.0550174	0.323091	0.435958
AT1G09680	-0.0128477	-0.0356206	0.918592	0.0709544	0.00386147	-0.0027149	-6.47565e-05	3.63007e-213	0.00621462	0.236104	0.0402449	0.464907	5.37926e-213	0.0314617	0.444135	0.209314	0.664068
AT1G09710	0.0183566	-0.117238	0.726011	-0.0119306	0.00660456	0.00153183	-1.93595e-05	2.76095e-100	0.733464	0.140649	0.422886	0.884752	3.59824e-100	0.884735	0.314788	0.723958	0.947151
AT1G09794	-0.31666	-0.327578	0.626416	-0.00249797	0.0115725	0.000324893	-4.70329e-05	0.00756228	0.991716	0.706958	0.980252	0.959103	0.0079109	1	0.846691	1	0.987807
AT1G09800	-0.165257	-0.0295876	0.732483	-0.20752	0.00828772	0.000780743	-0.000208878	1.35833e-30	0.00149774	0.32163	0.826676	0.401831	1.56748e-30	0.00951146	0.539713	0.952163	0.612217
AT1G09810	-0.0062679	-0.00633426	0.995411	0.00349362	1.31635e-05	-0.00020572	3.97778e-06	0	0.399394	0.980201	0.363039	0.801277	0	0.652656	0.99963	0.681058	0.902403
AT1G09850	-0.000417617	-0.00762135	0.987508	0.00131297	0.000630896	-1.02157e-05	-1.01242e-05	0	0.596059	0.0465015	0.939737	0.283627	0	0.80633	0.142664	0.990439	0.498664
AT1G09910	-0.29602	-0.0759595	0.807322	-0.224706	0.0088508	-0.004229	-0.000158525	6.59307e-111	1.27052e-09	0.0616155	0.0362252	0.261215	8.69082e-111	2.43951e-08	0.175715	0.197184	0.474293
AT1G09932	-0.117967	-0.0456746	0.880884	0.0584719	-0.000839906	-0.00525744	9.70434e-05	3.4913e-170	0.073583	0.840189	0.00369606	0.438908	4.95621e-170	0.221811	0.927625	0.0390415	0.643502
AT1G09980	0.124226	0.062515	0.942265	0.0306845	-0.00197421	0.00443076	-7.77836e-05	0	0.0428364	0.308451	8.29168e-08	0.178054	0	0.150128	0.525946	4.25766e-06	0.375851
AT1G10030	-0.0142149	-0.00863038	0.963015	-0.0157162	0.00177385	-4.89527e-05	-4.71483e-05	0	0.00463573	0.0124992	0.871579	0.0258722	0	0.0246344	0.0531054	0.96741	0.0996261
AT1G10050	-0.0423107	0.196718	0.573602	-0.283526	-0.0163342	0.0132307	0.00025941	2.22124e-12	0.000718964	0.127761	0.00381446	0.416923	2.42528e-12	0.00503163	0.294677	0.0399496	0.625768
AT1G10060	-0.00810743	-0.0353161	0.929684	-0.0431022	0.00453006	0.00146343	-8.6624e-05	0	0.00261884	0.0134352	0.0610903	0.112632	0	0.015457	0.05614	0.270823	0.28122
AT1G10070	-0.0423394	0.0365716	0.915041	0.00109763	-0.00539609	-0.00175575	0.000127447	0	0.915805	4.8596e-05	0.00193652	0.00128155	0	0.978096	0.000535808	0.0240022	0.00948603
AT1G10090	0.0111051	0.0370621	0.973183	0.0025343	0.00248526	0.000125883	-0.000187478	0	0.843399	0.129984	0.857258	0.000126323	0	0.945591	0.298121	0.96365	0.00134336
AT1G10095	0.00994377	-0.120612	0.705467	0.0857992	0.0126336	-0.00370036	-0.000236729	7.38299e-162	0.00130914	0.000216532	0.0110597	0.0200084	1.03759e-161	0.00846328	0.00195903	0.0893724	0.0823996
AT1G10120	0.00196835	-0.0297531	0.890379	0.0189449	0.00335104	-0.000721466	-6.52375e-05	0	0.301807	0.15342	0.471037	0.350958	0	0.554776	0.333566	0.757824	0.562861
AT1G10130	-0.570489	0.070847	0.900986	-0.585798	-0.00911537	0.000117161	0.000222754	3.68976e-270	9.89386e-110	0.00679308	0.934971	0.0264175	5.72348e-270	6.35044e-107	0.0332114	0.989176	0.101231
AT1G10200	-0.01758	0.0158457	0.980146	-0.00907391	0.00165027	-0.000231839	-0.000109046	0	0.0047811	6.05464e-05	0.186372	5.87134e-19	0	0.0252872	0.000648475	0.492001	8.1169e-17
AT1G10240	0.000742469	0.00136428	0.979863	-0.0118363	-0.00402082	0.00133236	0.000108403	0	0.517268	0.0855484	0.181498	0.119768	0	0.749463	0.222823	0.486172	0.292082
AT1G10290	-0.106124	0.000805953	0.992578	-0.0566292	0.000977277	-0.0020173	-4.15333e-05	0	9.91372e-11	0.382949	2.4039e-05	0.213334	0	2.19962e-09	0.595464	0.000626719	0.419385
AT1G10320	0.0611853	-0.0416711	0.442601	0.0309728	-0.00121155	0.00144786	0.000125809	7.80283e-52	0.30147	0.752066	0.375944	0.270896	9.41663e-52	0.554443	0.877443	0.690422	0.485482
AT1G10380	0.00121566	0.00339796	0.967454	-0.0035433	-6.22214e-05	0.00018351	-3.06917e-06	0	0.754115	0.96571	0.766199	0.943263	0	0.896123	0.992687	0.926034	0.979337
AT1G10390	-0.0142714	0.0267658	1.00125	-0.007822	-0.000483916	-0.000195156	-4.88258e-05	0	0.0946862	0.419035	0.444696	0.00621037	0	0.264239	0.629147	0.740831	0.0334772
AT1G10410	-0.000649731	-0.0217158	0.959513	0.00599354	0.00209169	-0.000334348	-3.18289e-05	0	0.0230659	5.70562e-10	0.0201478	0.00154801	0	0.0914291	1.8311e-08	0.133615	0.0110488
AT1G10430	0.0333144	-0.0250086	0.852127	0.0312598	0.00409019	0.000286262	-0.000116868	0	0.0218693	0.0190447	0.700356	0.0245489	0	0.0878096	0.0731662	0.895347	0.095626
AT1G10470	0.0108602	-0.0715622	0.842128	0.0214947	0.00807573	-0.000336701	-0.000164777	0	0.0120895	1.71462e-13	0.471177	4.49957e-07	0	0.0552409	1.02717e-11	0.757831	9.14777e-06
AT1G10510	0.000203706	0.0197903	0.947295	-0.0186597	-0.0034036	0.000730862	9.84534e-05	0	0.215652	0.0775236	0.374025	0.0865787	0	0.447898	0.208197	0.689832	0.234902
AT1G10522	-0.00815428	-0.0213663	0.941599	-0.0298201	-0.00145919	0.00101508	0.000107785	0	0.0134847	0.34468	0.123164	0.0191482	0	0.0598977	0.560901	0.404663	0.0797338
AT1G10550	0.0203114	0.00218818	0.945573	0.00221688	0.00180236	0.000143592	-4.38262e-05	0	0.833727	0.182208	0.803173	0.276307	0	0.939313	0.374428	0.942775	0.490092
AT1G10570	-0.0792215	0.13223	0.355206	-0.100685	-0.0123602	0.000692411	0.000199278	1.49129e-52	2.49363e-05	5.23932e-05	0.595157	0.0286272	1.80263e-52	0.000257561	0.000568134	0.836603	0.107319
AT1G10600	-0.0293699	-0.0728627	0.129919	-0.0110706	0.0003162	-0.000386874	0.000144068	3.87511e-09	0.624717	0.913039	0.754012	0.094933	4.18128e-09	0.824696	0.966722	0.920471	0.250607
AT1G10650	0.00949118	-0.000453872	0.974621	-0.0101012	0.000426071	0.000472735	3.70802e-06	0	0.123615	0.611706	0.186531	0.882127	0	0.313946	0.780462	0.492123	0.945905
AT1G10657	0.0638581	0.145271	0.766812	-0.0277856	-0.00391075	0.00173096	-0.000197811	5.4068e-56	0.640625	0.560533	0.727186	0.421726	6.5745e-56	0.834095	0.743352	0.909597	0.629194
AT1G10660	-0.132892	-0.0208926	0.970484	-0.17835	-0.000388149	0.00143384	4.99099e-05	0	1.04655e-40	0.820234	0.0489888	0.326749	0	1.19041e-38	0.916402	0.238857	0.537858
AT1G10670	-0.000285443	-0.000930517	0.99378	-0.00164754	0.000147501	3.95604e-05	-2.07464e-06	0	0.143821	0.306382	0.51999	0.629211	0	0.346109	0.52352	0.791546	0.793222
AT1G10700	-0.000264407	-8.3366e-05	0.998765	0.00167286	4.42041e-05	-0.000119518	-7.3649e-07	0	0.144545	0.763149	0.0560272	0.866184	0	0.347386	0.883377	0.257628	0.937775
AT1G10720	-0.0213564	-0.0410186	0.894664	0.00808991	0.00638297	-0.00109254	-0.000168216	0	0.532931	0.000120406	0.122694	0.000671145	0	0.761613	0.0011735	0.403415	0.00549764
AT1G10730	-0.0157034	-0.0119736	0.910485	-0.0108014	-0.00221842	-7.9819e-05	0.000118752	0	0.6463	0.461318	0.950434	0.185674	0	0.838046	0.667752	0.994306	0.384706
AT1G10740	-0.0111328	-0.0377633	0.909096	0.00953022	0.00315674	-0.000112412	-7.33458e-05	0	0.460056	0.0557994	0.873096	0.135845	0	0.707137	0.163533	0.968359	0.315207
AT1G10750	-0.017831	-0.0106177	0.977754	0.0064444	0.00195494	-0.00098085	-5.28988e-05	0	0.654891	0.294052	0.213362	0.341121	0	0.844128	0.511531	0.528029	0.552907
AT1G10760	-0.0889658	-0.0171594	0.94406	-0.0766793	0.00703384	-0.00147185	-0.000202299	0	4.21857e-12	6.75167e-07	0.0147611	1.6202e-06	0	1.09561e-10	1.23817e-05	0.109261	2.883e-05
AT1G10780	-0.0136017	-0.0372203	0.925001	0.00752165	0.0040158	-0.000565238	-0.000104157	0	0.742778	0.175138	0.651918	0.238357	0	0.889828	0.365234	0.872526	0.449263
AT1G10820	-0.0194494	-0.0283249	0.756271	0.0349941	0.0131059	-0.00423958	-0.000421896	1.81406e-241	0.134461	1.17959e-05	0.000887808	2.20587e-06	2.75917e-241	0.331578	0.00015254	0.0127274	3.81926e-05
AT1G10830	-0.000581621	-0.0125633	0.947962	0.000523325	0.000958898	0.000357106	-2.65348e-05	0	0.931058	0.215343	0.279195	0.249854	0	0.982328	0.416955	0.602171	0.46283
AT1G10840	-0.0760102	-0.00863225	0.982659	-0.075434	0.000982064	5.38118e-05	-2.11316e-05	0	4.69749e-61	0.0934528	0.82933	0.225738	0	1.14086e-58	0.237692	0.954207	0.433251
AT1G10870	0.126002	0.0367655	0.627456	0.11228	0.00355416	-0.000490222	-0.000163608	2.0621e-48	0.0107624	0.528053	0.838272	0.329643	2.47827e-48	0.0502915	0.717756	0.957994	0.540429
AT1G10890	0.0701163	0.145889	0.598325	0.0192009	-0.0302135	0.00302465	0.000902912	5.56546e-76	0.563924	1.27695e-12	0.0956814	1.09579e-12	7.00241e-76	0.784187	6.59463e-11	0.352974	6.98353e-11
AT1G10900	-0.00343703	0.00246089	0.983501	0.010341	0.000791308	-0.000607193	-4.43766e-05	0	0.397416	0.61276	0.362392	0.340779	0	0.650843	0.781584	0.680412	0.55265
AT1G10910	-0.083322	0.294098	0.963392	-0.0865304	-0.00214653	0.00313442	-0.000680826	6.08387e-167	0.0159079	0.640161	0.109403	6.48246e-07	8.60262e-167	0.0683962	0.803381	0.378406	1.26085e-05
AT1G10920	0.0328625	-0.15703	0.312638	-0.0455224	0.0161586	0.000895417	-0.000206474	6.92052e-17	0.236058	0.00101132	0.66922	0.158601	7.6813e-17	0.47412	0.00711644	0.878669	0.348712
AT1G10930	0.0013373	0.00657651	0.991988	0.0038521	-0.000194394	-0.00011471	1.76621e-06	0	0.677611	0.871558	0.823723	0.960755	0	0.854206	0.945986	0.951411	0.988645
AT1G10940	-0.00662899	0.00531022	0.994078	-0.00318559	0.000495359	-0.000180096	-3.17235e-05	0	0.172762	0.0975091	0.157695	0.000368626	0	0.391536	0.244759	0.460829	0.00333919
AT1G10950	-0.0187319	-0.0299788	0.858861	-0.00667472	0.0100559	-0.00094983	-0.000321824	4.78249e-85	0.882309	0.0812902	0.699378	0.061147	6.10361e-85	0.962059	0.215352	0.895039	0.185479
AT1G11000	0.00359308	-0.0257495	0.86272	-0.0494269	0.00962325	0.00188547	-0.00032761	2.72928e-184	0.105924	0.0138796	0.258256	0.00493685	3.92908e-184	0.285301	0.0575023	0.579882	0.0279897
AT1G11020	-0.01251	-0.00975459	0.973516	-0.0278936	-7.66641e-05	0.000675466	2.29839e-05	0	0.00149469	0.94561	0.158644	0.492443	0	0.00950426	0.983688	0.462068	0.68766
AT1G11060	-0.010171	-0.00261656	0.998943	-0.00487535	-0.000724685	0.00023532	9.1498e-06	0	0.557535	0.495616	0.603822	0.772777	0	0.77989	0.693357	0.84097	0.885985
AT1G11070	0.00151197	0.00386869	0.977943	-0.00407622	0.00308612	-0.000118225	-9.82098e-05	0	0.760947	0.0644029	0.85766	0.0239579	0	0.899738	0.181646	0.963728	0.0937655
AT1G11080	-0.155965	0.0252226	0.848551	0.043483	-0.0165676	-0.00531318	0.000477599	1.09084e-19	0.660343	0.18089	0.316398	0.196345	1.22041e-19	0.84748	0.37256	0.64025	0.398274
AT1G11160	-0.171431	-0.00192173	0.605836	-0.24034	0.00729965	0.000941081	-0.000124922	3.76425e-14	0.00590148	0.514246	0.85077	0.712555	4.13515e-14	0.0301854	0.707659	0.962026	0.850786
AT1G11170	0.0220997	-0.0196099	0.861071	-0.0375653	0.0063334	0.00326147	-0.000195188	0	0.0641367	0.0147081	0.00321741	0.0116275	0	0.200743	0.0599784	0.0353875	0.0547901
AT1G11180	-0.0854119	-0.0696239	0.86984	-0.0723554	0.00595565	0.00011221	-8.4444e-05	0	1.28641e-16	1.01733e-07	0.814031	0.0112985	0	5.04791e-15	2.14595e-06	0.947665	0.053436
AT1G11190	0.0356977	0.0226973	0.979496	-0.013122	0.000879255	0.00110467	-3.47585e-05	0	0.425181	0.679238	0.219461	0.583643	0	0.676346	0.831036	0.535506	0.758757
AT1G11260	0.00144439	0.00136599	0.96222	0.00657747	-0.000672563	-0.000220582	2.09454e-05	0	0.0206986	0.0644679	0.154989	0.0532956	0	0.0842797	0.181772	0.455439	0.168632
AT1G11270	-0.0118492	-0.0145086	0.99261	-0.00402331	-0.0022082	-0.000175789	9.64541e-05	0	0.810599	0.29083	0.844808	0.123149	0	0.927759	0.50795	0.960671	0.298441
AT1G11280	-0.009967	0.0513	0.376303	0.0123424	0.0108198	-0.00195419	-0.000498772	2.22948e-08	0.858079	0.220483	0.603773	0.0580091	2.39987e-08	0.950647	0.423981	0.84097	0.179562
AT1G11303	-0.10896	0.086756	0.688247	-0.18731	-0.000587008	0.000372202	-0.000113604	8.69117e-16	0.0328456	0.958313	0.938045	0.734225	9.61098e-16	0.122418	0.989551	0.989597	0.864372
AT1G11310	0.00448471	-0.0115591	0.963691	0.00976638	-0.000302164	-0.000236147	3.67481e-05	0	0.114675	0.702846	0.484435	0.119451	0	0.300605	0.843774	0.767072	0.29176
AT1G11320	0.103662	0.0317821	0.9189	0.0231491	0.00259013	0.00242768	-0.000148538	2.25978e-83	0.634764	0.677826	0.361155	0.423956	2.87789e-83	0.830902	0.830164	0.67927	0.631262
AT1G11330	-0.000948369	-0.00473078	0.993803	-6.13586e-05	0.000574906	2.28684e-05	-1.67734e-05	0	0.983636	0.133076	0.888562	0.141334	0	1	0.303585	0.975637	0.323464
AT1G11340	0.00609813	-0.0287329	0.605825	-0.0197662	0.0108539	0.000383434	-0.000452564	8.30577e-30	0.71836	0.12165	0.897959	0.0303029	9.5601e-30	0.876705	0.28497	0.979193	0.111508
AT1G11350	-0.0789606	-0.0193251	0.89514	-0.0723117	-0.00315228	0.000915188	0.000127477	0	1.30679e-09	0.0387314	0.159313	0.00502472	0	2.50379e-08	0.12488	0.4624	0.0283441
AT1G11360	-0.0517327	-0.0291036	0.926161	-0.164592	0.00987443	0.00471698	-0.000283645	0	1.19952e-12	0.000862794	0.000189488	0.00131762	0	3.31659e-11	0.00625902	0.00355667	0.00972098
AT1G11380	-0.00706917	-0.0517824	0.859323	0.0216693	0.0026631	-0.000698352	-1.27841e-05	0	0.0671022	0.0786117	0.279411	0.776897	0	0.20721	0.210365	0.602252	0.888193
AT1G11390	-0.00195937	-0.0138459	0.965183	-0.0124975	0.00300535	0.000130986	-7.61383e-05	0	0.0308202	4.93417e-05	0.678246	0.000558541	0	0.116857	0.000542034	0.884061	0.00468049
AT1G11410	0.0390124	0.0340209	0.869215	-0.0145408	0.00545297	0.00248005	-0.000313455	4.15993e-164	0.656194	0.19194	0.163986	0.0118224	5.86094e-164	0.845017	0.387145	0.469892	0.0554759
AT1G11450	0.0399375	-0.0590713	0.745498	0.0668942	0.00157052	-0.00179012	7.11064e-05	4.43177e-66	0.133145	0.782865	0.461317	0.675388	5.48086e-66	0.329508	0.895009	0.752779	0.827972
AT1G11480	0.00104902	-0.001792	0.98893	0.00399147	0.000188307	-7.70852e-05	-5.38547e-06	0	0.100339	0.544567	0.560767	0.560841	0	0.275313	0.730697	0.815776	0.740808
AT1G11545	-0.00679375	-0.0394511	0.909006	0.00763292	0.00322723	-0.000189044	-3.91496e-05	0	0.188265	1.37361e-05	0.550293	0.0766837	0	0.41212	0.000173848	0.810378	0.217544
AT1G11580	-0.00417375	-0.00685686	0.982916	-0.000189996	0.000212488	-0.000159919	1.09364e-06	0	0.94866	0.573536	0.320496	0.922547	0	0.988627	0.753369	0.644635	0.968933
AT1G11650	-0.00581728	0.0287144	0.960542	-0.00792506	0.000118315	0.000483431	-9.31994e-05	0	0.0881782	0.842292	0.0565788	1.43996e-07	0	0.251067	0.929034	0.258605	3.35221e-06
AT1G11680	-0.000817466	-0.00808252	0.9859	-3.05459e-05	0.00108945	-3.43573e-05	-2.48989e-05	0	0.985065	1.80586e-07	0.69954	6.26359e-05	0	1	3.64663e-06	0.895039	0.000739614
AT1G11720	-0.115064	0.0289378	0.885093	0.022772	0.0175812	-0.0109656	-0.00063652	1.06633e-202	0.44615	4.27927e-06	1.76012e-11	2.32113e-08	1.56135e-202	0.695783	6.32459e-05	1.6826e-09	6.59339e-07
AT1G11740	-0.0322213	-0.0187679	0.0995886	-0.0272457	0.0032995	0.000378064	-9.53831e-05	1.09875e-13	0.0475923	0.0607808	0.614352	0.0688743	1.20568e-13	0.162117	0.174052	0.848273	0.201665
AT1G11750	-0.00227804	0.000233178	0.99363	-0.00263994	0.00016825	4.93625e-05	-6.08554e-06	0	0.0306742	0.281653	0.458834	0.191239	0	0.116401	0.49764	0.751309	0.391926
AT1G11780	-0.0313911	0.00917232	0.832899	0.0909056	0.0153632	-0.00915843	-0.000528328	4.68442e-37	0.176033	0.0738885	0.0124638	0.0391269	5.49317e-37	0.395756	0.20098	0.0970532	0.135177
AT1G11790	-0.0216637	-3.94501e-05	0.985462	-0.00511783	-0.000420456	-0.000586977	1.32131e-05	0	0.436604	0.617399	0.101944	0.598288	0	0.687097	0.785717	0.364618	0.771127
AT1G11800	0.00737079	-0.00457701	0.983041	0.00547335	9.22133e-05	3.56408e-05	1.32145e-05	0	0.339987	0.900009	0.909322	0.545631	0	0.594454	0.958023	0.981818	0.728427
AT1G11820	-0.00498723	0.00929926	0.973726	-0.000549272	-0.000790804	9.78624e-05	8.34032e-06	0	0.928815	0.314756	0.770472	0.721962	0	0.981373	0.533282	0.92783	0.85667
AT1G11840	0.000730113	0.000393492	0.999404	-5.417e-05	-2.38422e-05	2.10918e-05	7.04039e-07	0	0.894985	0.649759	0.346142	0.652686	0	0.968722	0.810787	0.667699	0.810178
AT1G11850	0.00731758	0.0080068	0.999718	-0.00478642	-0.000288665	0.000232409	4.53051e-06	0	0.27073	0.603642	0.326948	0.784492	0	0.519975	0.774596	0.649416	0.893013
AT1G11870	0.0231712	0.0184251	0.900971	0.0147785	0.00137266	0.000104045	-0.000109838	0	0.437515	0.572996	0.92019	0.1301	0	0.687738	0.752989	0.985406	0.30774
AT1G11880	0.0080774	-0.0884694	0.535507	0.0635599	0.00479925	-0.00310885	-2.88745e-05	1.37253e-19	0.294844	0.53642	0.347623	0.900653	1.53517e-19	0.549455	0.723674	0.669181	0.955296
AT1G11890	0.000607358	-0.00439841	0.98065	0.00345711	9.90965e-05	-2.04962e-05	1.14445e-06	0	0.098395	0.711178	0.857462	0.885881	0	0.272306	0.850046	0.96365	0.947469
AT1G11940	-0.0700789	-0.0653162	0.793744	0.0001978	0.00251788	-0.00377307	2.05407e-05	6.34665e-82	0.996284	0.643116	0.103452	0.899049	8.06547e-82	1	0.805461	0.367551	0.954384
AT1G11960	-7.0696e-05	-0.0366359	0.870834	0.00173445	-0.000296159	0.00103893	7.82223e-05	4.65443e-165	0.957606	0.943442	0.559449	0.529425	6.56692e-165	0.992967	0.982728	0.815156	0.717091
AT1G12000	0.000130632	0.000130632	1.00004	-0.000265186	9.61101e-06	3.07455e-05	-1.26114e-06	0	0.499534	0.848312	0.151291	0.39959	0	0.737042	0.931671	0.450774	0.610766
AT1G12110	0.00117669	-0.0110404	0.968797	0.00622805	0.000918715	-0.000194646	-1.16061e-05	0	0.000152035	1.25895e-05	0.030014	0.0640834	0	0.00128886	0.000160462	0.174004	0.191759
AT1G12140	-0.0133182	0.00611108	0.99616	-0.00833901	-0.000740158	-9.45839e-05	1.22683e-05	0	0.0748181	0.216475	0.711081	0.491732	0	0.224105	0.418422	0.900859	0.687094
AT1G12160	0.00449101	0.0356697	0.9546	-0.00573145	-0.00180823	7.51789e-05	3.56377e-05	0	0.798795	0.529627	0.951129	0.677573	0	0.920844	0.718917	0.994398	0.829181
AT1G12200	0.00439189	-0.00300177	0.956966	0.0074314	0.000474875	-8.53126e-05	-9.25483e-06	0	0.317129	0.617326	0.833269	0.743812	0	0.56985	0.785717	0.955627	0.870726
AT1G12220	-0.0193139	0.0955257	0.97682	-0.0344269	-0.00525753	0.00202785	-8.40566e-05	4.75982e-64	0.561597	0.48839	0.530828	0.710055	5.86799e-64	0.782831	0.688562	0.799534	0.849268
AT1G12230	0.00425368	-0.0303966	0.945999	0.0256742	0.000425733	-0.000872865	5.01567e-05	0	1.64115e-06	0.534444	0.00281649	0.0140346	0	2.05969e-05	0.722577	0.0322408	0.0636624
AT1G12240	-0.00639695	0.0215585	0.961157	-0.00242126	-0.0014213	0.000154302	-9.83655e-06	0	0.59011	0.013455	0.529182	0.565921	0	0.802106	0.0561834	0.798394	0.744893
AT1G12250	0.0220194	0.129554	0.958498	-0.0269569	-0.0104292	0.00248112	0.000102272	0	0.120863	2.72432e-06	0.0088707	0.122649	0	0.310219	4.34826e-05	0.0759912	0.297629
AT1G12290	-0.0713228	0.133967	0.869391	-0.0386781	-0.00910601	-0.002712	0.00010526	5.34972e-238	0.153123	0.00856852	0.0663399	0.307794	8.10121e-238	0.361714	0.0398316	0.284413	0.520864
AT1G12330	0.00546353	-0.0369043	0.84605	0.0350236	0.00230008	-0.00111906	-1.53154e-05	0	0.100154	0.398715	0.335586	0.85041	0	0.275057	0.611931	0.658401	0.927964
AT1G12350	-0.275428	-0.119343	0.548074	-0.288034	0.0166979	-0.000662615	-0.000382592	1.7845e-58	1.47016e-16	0.000182409	0.727642	0.00400559	2.17785e-58	5.69434e-15	0.00169857	0.909648	0.0240282
AT1G12360	-0.101585	0.00578076	0.909556	-0.0870645	0.00885433	-0.00229208	-0.000318442	0	4.27477e-05	0.00114296	0.0483001	8.63062e-05	0	0.000421196	0.00788839	0.236784	0.000969435
AT1G12390	-0.000343231	-0.00489706	0.985066	-0.0136475	0.00118072	0.000554438	-3.29497e-05	0	3.95121e-06	0.00180851	0.000590582	0.00347607	0	4.68411e-05	0.0114229	0.0091342	0.0213215
AT1G12470	-0.00189062	0.0397265	0.955659	-0.00456162	0.00149945	-0.000740725	-0.000120285	0	0.800692	0.516593	0.452397	0.080767	0	0.922201	0.709369	0.747286	0.224771
AT1G12480	-0.00206216	0.0015114	0.831945	0.0112241	0.00407686	-0.00179802	-8.47515e-05	1.70544e-128	0.752479	0.368766	0.361956	0.534777	2.299e-128	0.895835	0.582276	0.680019	0.719754
AT1G12520	-0.0193492	-0.0414356	0.863411	0.0125486	-0.00343495	-0.00061212	0.000198003	0	0.523956	0.172752	0.56881	0.00834682	0	0.754974	0.3616	0.82057	0.0420901
AT1G12680	0.0211919	0.0292889	0.982034	-0.00121366	1.31273e-05	0.00158641	-9.42419e-05	0	0.895638	0.991152	0.00167268	0.00754143	0	0.969196	1	0.0213505	0.0388129
AT1G12710	-0.0749051	-0.174036	0.56556	-0.122948	0.0268337	0.0014272	-0.000624732	5.97598e-215	3.33623e-11	1.15117e-29	0.158266	9.69846e-19	8.8702e-215	7.82752e-10	3.97861e-27	0.461596	1.32046e-16
AT1G12730	-0.135293	-0.107105	0.213121	-0.0441467	0.000197239	-0.00547358	0.000285747	1.39035e-11	0.172339	0.961989	0.00192468	0.020493	1.51163e-11	0.391071	0.9909	0.0238883	0.0837045
AT1G12740	0.00715484	-0.00532144	0.968914	0.0104748	-0.000636224	-0.000452638	4.90564e-05	0	0.347606	0.655674	0.456896	0.248546	0	0.603475	0.815147	0.75003	0.461549
AT1G12750	0.042288	0.0263263	0.774806	0.0378234	0.00603012	-0.00173886	-0.00029184	2.10449e-93	0.329297	0.224133	0.41103	0.0483237	2.71474e-93	0.583867	0.429369	0.714137	0.157618
AT1G12760	-0.0119654	0.000948577	0.990282	-0.00634428	-6.29429e-05	-0.000214302	-5.36034e-06	0	0.0742241	0.889896	0.268999	0.692345	0	0.222995	0.952885	0.590626	0.838443
AT1G12780	-0.000711424	0.00431224	0.999214	1.86189e-05	-0.00051135	-5.3657e-05	1.07728e-05	0	0.980022	7.64039e-08	0.185894	0.000144259	0	1	1.67398e-06	0.491539	0.00150296
AT1G12800	-0.00338447	0.0233095	0.989606	0.00386767	0.0013644	-0.000370186	-0.000113921	0	0.486326	0.0549181	0.221941	7.49065e-08	0	0.727392	0.161808	0.53758	1.90144e-06
AT1G12810	-0.00430778	0.00217695	0.972812	0.00258468	-0.00110939	-0.000284675	4.25944e-05	0	0.500647	0.0238608	0.173935	0.00359828	0	0.738358	0.0868773	0.477219	0.0219661
AT1G12820	0.0057371	-0.00703141	0.976084	0.000347814	0.000891835	4.04397e-05	-1.23588e-05	0	0.936503	0.110355	0.865179	0.457745	0	0.983799	0.266715	0.965432	0.658023
AT1G12860	-0.0469042	-0.0102335	0.824	-0.055955	0.00508317	0.000943648	-0.000149488	6.22734e-165	0.0700341	0.198311	0.575447	0.204207	8.782e-165	0.214568	0.395742	0.824585	0.408299
AT1G12900	0.00147324	0.0021924	0.999553	-0.000775177	-7.06514e-05	7.73135e-05	-1.71812e-06	0	0.218293	0.380493	0.024407	0.474134	0	0.450731	0.592977	0.152305	0.671695
AT1G12930	0.00665664	0.176595	0.818043	-0.0602573	-0.00185727	0.00168994	-0.000253065	4.72712e-126	0.0863934	0.679535	0.37804	0.0588784	6.35326e-126	0.24716	0.831053	0.690741	0.181223
AT1G12970	0.00800889	0.00112919	0.976071	0.0247107	-0.000480996	-0.0010399	2.514e-05	0	0.0276401	0.737574	0.0893409	0.556692	0	0.106736	0.868201	0.33746	0.737653
AT1G13000	0.00801847	0.00328133	0.943204	0.000798	0.00359898	-0.000195182	-0.000140647	0	0.919743	0.000382649	0.651458	3.18604e-06	0	0.979852	0.00316259	0.872299	5.38153e-05
AT1G13080	-0.0246587	0.0493335	0.99554	0.013142	-0.00165024	-0.00156381	-5.0589e-05	0	0.512187	0.52004	0.152825	0.508068	0	0.746434	0.712251	0.452036	0.699372
AT1G13090	-0.0438277	-0.0330352	0.915727	-0.010793	-0.000872046	-0.00131428	9.5523e-05	0	0.490784	0.663449	0.124034	0.109648	0	0.73101	0.820327	0.406331	0.276458
AT1G13120	0.00173512	0.0072567	1.00155	-0.000366845	-0.000752004	8.76733e-05	1.70203e-05	0	0.927937	0.147319	0.691956	0.271013	0	0.981373	0.324384	0.892399	0.485482
AT1G13180	-0.120322	0.113568	0.973597	-0.0566318	-0.0175948	-0.0015536	0.000404683	1.29779e-133	0.163095	0.000706805	0.483079	0.00893693	1.76003e-133	0.376254	0.00527521	0.76639	0.0445657
AT1G13195	-0.0128039	-0.0404856	0.866575	0.0264847	0.00209692	-0.00144218	1.4293e-05	0	0.0112988	0.116948	0.0114513	0.719869	0	0.0521166	0.27831	0.0916305	0.855128
AT1G13210	0.00567981	0.00571198	0.995005	-0.00164167	-0.000336318	0.000136569	1.06279e-05	0	0.667391	0.491392	0.512282	0.465522	0	0.850202	0.690191	0.785226	0.664419
AT1G13220	-0.15357	-0.055738	0.480378	-0.167214	0.00502527	0.00152233	-0.000114835	3.12074e-48	7.36941e-07	0.244809	0.408641	0.372397	3.74706e-48	9.62522e-06	0.455174	0.713213	0.584313
AT1G13270	-0.0171029	-0.0100625	0.974657	-0.0452712	0.00246798	0.00128087	-6.83381e-05	0	9.35587e-21	6.86081e-05	1.26247e-06	0.000215854	0	4.83172e-19	0.000721911	4.91105e-05	0.00211753
AT1G13300	0.0119191	0.0140339	0.978438	0.0117036	-0.00218623	1.38246e-05	5.93216e-05	0	0.0394752	0.00264255	0.964437	0.00618215	0	0.140931	0.0155101	0.999483	0.0333851
AT1G13320	-0.00175393	-0.000794729	0.997831	-0.00308351	0.000193028	0.000130765	-7.64701e-06	0	0.00453932	0.16495	0.0273745	0.0648513	0	0.0241936	0.351046	0.163524	0.193157
AT1G13350	0.234925	0.0885884	0.198904	0.54167	0.0101167	-0.0151127	-0.000552763	7.12118e-10	3.64007e-60	0.0169241	5.8961e-17	1.1884e-05	7.70232e-10	8.38709e-58	0.0668482	1.23215e-14	0.000172912
AT1G13380	-0.00355932	-0.0126958	0.976751	0.000582157	0.00048342	-0.000192136	7.31201e-06	0	0.823178	0.146962	0.176416	0.461574	0	0.933996	0.324074	0.479849	0.66147
AT1G13390	0.00319553	-0.00114705	0.988503	0.00430231	0.000356768	-0.000123453	-8.76813e-06	0	0.131174	0.327891	0.427217	0.419669	0	0.325812	0.546167	0.726782	0.627792
AT1G13410	0.183528	0.32081	0.682369	-0.094945	0.00380282	0.0123178	-0.000947252	2.40591e-19	0.22825	0.69805	0.00859476	0.00226252	2.68766e-19	0.462912	0.841096	0.0742117	0.0150489
AT1G13440	0.000686215	-0.000414896	0.993257	0.00186929	5.93394e-05	-0.000132377	7.59244e-07	0	0.0317844	0.594217	0.0053172	0.819049	0	0.119654	0.768736	0.0519351	0.912582
AT1G13450	-0.0872091	0.0768995	0.903523	-0.114881	-0.00726323	0.000989369	0.000132945	0	6.10823e-09	0.00406661	0.358735	0.0775844	0	1.07836e-07	0.0218687	0.678904	0.218893
AT1G13510	-0.0128873	0.0209105	0.973295	-0.0347353	0.00128399	0.00230296	-0.000118328	1.77703e-280	0.215726	0.719553	0.138577	0.271641	2.77422e-280	0.4479	0.856411	0.431539	0.485734
AT1G13560	0.00030768	-0.000828561	0.998589	0.00159739	2.20812e-05	-5.58798e-05	1.05621e-06	0	0.0417307	0.825873	0.191666	0.723956	0	0.147171	0.919729	0.500274	0.857685
AT1G13570	0.00854858	-0.0950439	0.806686	0.0105058	0.012133	-0.000277591	-0.000257469	0	0.371887	7.61256e-16	0.665391	9.43634e-09	0	0.627199	6.05367e-14	0.876504	2.91392e-07
AT1G13580	-0.00519563	-0.00143121	0.989147	0.00696824	0.0018966	-0.000760662	-6.95393e-05	0	0.538156	0.190327	0.218024	0.10706	0	0.76529	0.384979	0.534549	0.271938
AT1G13630	-0.0014571	-0.127885	-0.012414	0.133198	0.0094961	-0.00955276	-8.70278e-05	0.904377	0.206794	0.487922	0.103278	0.83138	0.915275	0.438473	0.688516	0.367258	0.918744
AT1G13700	-0.031847	0.0187363	0.926878	-0.0229944	-0.00220367	-0.000768925	5.39404e-05	0	0.0214433	0.0849091	0.158582	0.15696	0	0.086641	0.221671	0.462068	0.346631
AT1G13750	-0.0251812	-0.018726	0.965357	0.0240282	0.00155376	-0.00133859	-5.29321e-05	0	0.195257	0.512719	0.185968	0.454188	0	0.422486	0.706315	0.491539	0.655958
AT1G13770	0.116213	0.0876899	0.637294	0.0834105	0.00445083	-0.00106205	-0.00025105	2.47103e-32	0.130961	0.528753	0.72446	0.233081	2.86253e-32	0.325812	0.718477	0.908203	0.442557
AT1G13780	0.0306091	-0.0226882	0.845253	-0.0434792	0.00569834	0.0036484	-0.000183408	9.82075e-179	0.152912	0.143153	0.0279157	0.113737	1.40592e-178	0.361455	0.318078	0.165251	0.282956
AT1G13820	0.0304838	0.0347842	1.00156	-0.0145169	-0.000821562	0.00220649	-6.04063e-05	0	0.0195391	0.301651	7.72761e-11	0.0108075	0	0.0805774	0.518583	6.61337e-09	0.051548
AT1G13860	-0.0121093	0.00113294	0.942249	-0.0170839	0.00441905	0.00114199	-0.000193894	0	0.437794	0.116709	0.341734	0.0208821	0	0.687738	0.277839	0.662672	0.0847545
AT1G13880	-0.0192422	-0.154413	0.728723	-0.00936302	0.0170664	-5.04171e-05	-0.00031533	0	0.538259	1.81686e-18	0.951561	5.41254e-08	0	0.765316	2.23648e-16	0.994618	1.41387e-06
AT1G13910	-0.0147667	-0.000648403	0.948833	0.00848385	0.00656482	-0.00259929	-0.000202015	7.16728e-147	0.82203	0.173695	0.2065	0.160014	9.8872e-147	0.933358	0.362982	0.521353	0.350961
AT1G13940	-0.00480182	0.00778967	0.9806	-0.0246602	-0.002037	0.000513131	7.29933e-05	0	0.0502871	0.206291	0.455286	0.128526	0	0.168173	0.405453	0.749101	0.305538
AT1G13950	0.00203403	0.00106736	0.998671	0.000241073	-0.000240035	6.2225e-05	5.9336e-06	0	0.899637	0.326338	0.550696	0.41547	0	0.971698	0.544354	0.810514	0.624526
AT1G13970	-0.00729856	0.000257761	0.985504	-0.00340645	0.00021857	-0.000132368	-9.46325e-06	0	0.73367	0.864509	0.808507	0.804171	0	0.884735	0.942088	0.945257	0.904
AT1G13990	-0.0241651	-0.0122041	0.968555	-0.0293165	0.000929305	0.000446862	-7.73564e-06	0	3.24456e-10	0.119332	0.0790032	0.663456	0	6.73339e-09	0.282048	0.315779	0.818705
AT1G14010	0.00901823	0.00881906	0.980687	-0.00433546	6.58136e-05	0.000803798	-3.44327e-05	0	0.361294	0.913745	0.00191923	0.0571805	0	0.617448	0.967025	0.0238536	0.177503
AT1G14020	-0.0290189	0.0152564	0.93314	-0.0255878	-0.00775068	-1.03937e-05	0.000260352	0	0.0790656	3.21479e-05	0.989567	2.76878e-06	0	0.232793	0.000368941	1	4.70326e-05
AT1G14030	-0.519555	0.135435	0.884722	-0.441281	-0.000171896	-0.00117463	-0.000375045	7.40685e-172	4.78693e-42	0.967003	0.507367	0.00245227	1.05297e-171	6.14505e-40	0.993539	0.782065	0.0160263
AT1G14120	-0.0313697	0.072708	0.955146	-0.00690598	-0.00902114	0.000659666	0.000133609	0	0.737239	0.000613531	0.556897	0.0886133	0	0.88674	0.00470409	0.813175	0.238836
AT1G14130	0.0110885	-0.103128	0.768799	0.00229718	0.0108727	0.000141152	-0.000183816	0	0.892959	6.42595e-07	0.879534	0.00473534	0	0.968045	1.1857e-05	0.971662	0.0271723
AT1G14140	-0.0961968	0.0668925	0.46703	-0.0968781	-0.0206669	0.00228624	0.000632933	5.43295e-78	0.000156769	2.92128e-10	0.102009	9.2687e-11	6.85873e-78	0.00132523	9.98122e-09	0.364618	3.94732e-09
AT1G14150	0.00211004	0.00497698	0.995819	0.00445522	-0.000167223	-0.000265447	-7.83528e-07	0	0.074005	0.600189	0.0510335	0.934311	0	0.222709	0.772128	0.24367	0.974207
AT1G14180	-0.0500402	0.034193	0.966905	-0.0552993	0.000372127	0.00183311	-0.000147975	1.47198e-144	0.151389	0.940447	0.384368	0.319228	2.02406e-144	0.35913	0.980979	0.694383	0.532403
AT1G14205	-0.233131	-0.149558	0.29138	-0.0914352	0.0272658	-0.0120015	-0.000823414	0.0418998	0.533735	0.146933	0.134322	0.141532	0.0435022	0.762503	0.324074	0.424558	0.323525
AT1G14230	0.0201654	0.0824295	0.937674	-0.0199351	-0.0077167	0.00137194	0.000153586	0	0.344084	0.00420267	0.23266	0.0558598	0	0.599214	0.0225195	0.549746	0.174654
AT1G14270	0.00312151	0.143488	0.762179	-0.00361612	0.00718011	0.000123856	-0.000665557	0	0.856111	0.00489129	0.909362	2.04659e-18	0	0.949831	0.0252749	0.981818	2.74488e-16
AT1G14290	0.0104738	0.00965575	0.987462	0.00553994	-0.00110225	4.17365e-05	2.80022e-05	0	0.0723829	0.0052047	0.804043	0.0172043	0	0.21937	0.0266341	0.943106	0.0736883
AT1G14310	0.0400441	0.0148562	0.939854	0.0561642	-0.00392593	-0.000604493	0.000136421	0	1.60628e-05	0.0184368	0.394759	0.00598693	0	0.000171629	0.0714169	0.701685	0.0326165
AT1G14320	0.000359852	-0.00100877	0.996384	0.0006832	4.9722e-05	5.09446e-06	-1.35706e-07	0	0.144926	0.406996	0.842072	0.939455	0	0.347837	0.619277	0.959615	0.977416
AT1G14340	-0.00217993	0.0220638	0.0668279	-0.0061062	-0.00302756	0.000209665	6.34344e-05	2.86654e-27	0.335346	0.000188829	0.544275	0.00865464	3.27469e-27	0.589927	0.00175291	0.80961	0.0434716
AT1G14350	-0.00142384	0.00626318	0.950136	-0.0193807	0.00136331	0.00165444	-9.86395e-05	0	0.302774	0.570997	0.106853	0.168873	0	0.555704	0.751435	0.373466	0.362958
AT1G14360	-0.00252675	-0.00126663	0.997072	0.00251635	0.000337398	-0.000259347	-9.89787e-06	0	0.163095	0.143829	0.00841497	0.150116	0	0.376254	0.319163	0.0731305	0.336562
AT1G14370	-0.0161389	-0.0234212	0.949674	0.0152271	0.00118088	-0.000708956	-4.53763e-06	0	0.0850719	0.296588	0.141668	0.89292	0	0.244469	0.513317	0.435819	0.951618
AT1G14460	0.0113021	0.00167037	0.99724	-0.0115527	-0.00119823	0.00135078	7.22651e-06	0	0.612001	0.680933	0.276996	0.933669	0	0.816789	0.832045	0.599512	0.973764
AT1G14510	-0.00506188	-0.00624252	0.959463	0.0102868	-0.000863593	-0.000321748	2.9597e-05	0	0.142839	0.336304	0.400849	0.268754	0	0.344207	0.55308	0.705726	0.482977
AT1G14530	0.00178734	0.000717083	0.993571	-0.000906955	6.74301e-05	0.000119988	3.73221e-06	0	0.871084	0.924869	0.69392	0.860938	0	0.955863	0.973099	0.893094	0.934573
AT1G14560	0.02511	0.203799	0.927779	-0.0095879	-0.0020465	0.000488771	-0.000409973	2.65524e-187	0.768732	0.623753	0.783502	0.000973414	3.83232e-187	0.904047	0.790891	0.934752	0.00748953
AT1G14580	-0.018378	0.00253938	0.985576	0.0113874	0.00248816	-0.00228467	-8.02781e-05	0	0.196025	0.0272351	1.9843e-06	0.0167999	0	0.423352	0.0958617	7.36814e-05	0.0726136
AT1G14600	-0.142497	-0.00958372	0.9075	-0.116685	0.00540364	-0.00404332	-0.000119331	6.50976e-73	0.0153422	0.375153	0.114679	0.496123	8.1483e-73	0.066441	0.587611	0.389309	0.69007
AT1G14620	0.00322195	-0.00613308	0.980232	0.0141168	0.000187349	-0.000432674	4.95374e-06	0	1.84654e-05	0.656867	0.0161246	0.693412	0	0.000195672	0.816138	0.115639	0.838885
AT1G14660	-0.12116	-9.73016e-05	0.139261	-0.122263	0.00103101	0.00268316	-0.00014269	0.0175741	0.0421515	0.893457	0.413684	0.533876	0.0183096	0.148274	0.955104	0.716702	0.719679
AT1G14690	-0.0161432	-0.000299915	1.00062	-0.00217011	-0.000147272	-0.0009719	4.95371e-06	0	0.720616	0.849544	0.00332517	0.830428	0	0.877433	0.932128	0.0362621	0.918264
AT1G14700	-0.202848	0.0386886	0.807119	-0.310184	-0.0053745	0.0050145	0.000150325	1.38595e-46	7.92639e-08	0.467176	0.111622	0.494902	1.65746e-46	1.20928e-06	0.671992	0.383717	0.689379
AT1G14720	-0.0165489	-0.0794005	0.831588	0.00371895	0.00641571	-0.000409222	-8.13089e-05	0	0.582471	1.23358e-13	0.267468	0.00161534	0	0.796907	7.64479e-12	0.58923	0.0114305
AT1G14780	0.0166044	-0.0146407	0.814232	-0.0517985	0.00606533	0.00172659	-0.000127797	2.11341e-62	0.301227	0.344067	0.527612	0.503444	2.59725e-62	0.554283	0.560309	0.797877	0.695789
AT1G14790	-0.0969109	0.040861	0.94048	-0.116353	0.00754678	-0.00113978	-0.000321369	8.2506e-141	0.00231519	0.12248	0.584356	0.0272928	1.13104e-140	0.0139532	0.286318	0.83007	0.103701
AT1G14810	-0.00128602	0.00263246	1.00064	-0.000488992	-0.000178658	-0.000247466	3.20083e-06	0	0.903131	0.728175	0.258893	0.834462	0	0.972715	0.861526	0.580777	0.920121
AT1G14820	-0.00232272	-0.0863785	0.848639	-0.00574572	0.00835143	0.000397999	-0.000138229	0	0.592989	1.26015e-09	0.497343	0.000742943	0	0.804348	3.82559e-08	0.774476	0.00596612
AT1G14860	-0.00287145	-0.102853	0.786309	0.00957242	0.0125986	-0.000343278	-0.000270699	0	0.310231	1.65284e-25	0.504751	5.17028e-14	0	0.562725	4.12568e-23	0.78063	3.87167e-12
AT1G14870	-0.00332298	-0.00433344	0.981659	-0.00487143	-6.34711e-05	0.000172395	1.03704e-05	0	0.00741003	0.785081	0.0823728	0.134812	0	0.0365458	0.895681	0.323091	0.314003
AT1G14910	0	0	0.999943	9.95705e-06	1.41109e-05	-1.06683e-06	-6.06139e-07	0	0.92752	0.313646	0.858211	0.146329	0	0.981373	0.532599	0.964059	0.330464
AT1G14970	-0.153821	0.0395537	0.289167	-0.203279	-0.0121687	0.00464018	0.000367428	0.000121382	0.00844925	0.217869	0.270488	0.211773	0.000128549	0.0409741	0.420484	0.592976	0.417326
AT1G14990	-0.0607708	-0.0217835	0.892997	-0.0714166	0.00833719	2.04515e-05	-0.000241648	0	0.00191309	0.00463016	0.987003	0.00587666	0	0.0117989	0.0242547	1	0.032141
AT1G15020	0.036625	0.00353744	0.916784	0.0138119	0.00153589	0.00119149	-9.25957e-05	0	0.41037	0.474289	0.192997	0.147682	0	0.661806	0.677361	0.50109	0.332517
AT1G15030	-0.00223166	0.0290862	0.823019	-0.0160209	-0.0116308	0.000639507	0.000394428	0	0.474344	4.9167e-05	0.600645	3.82971e-06	0	0.720565	0.000540777	0.839956	6.38474e-05
AT1G15040	-0.00804479	-0.00479054	0.946965	-0.00817952	0.000593946	0.00023571	-2.07421e-05	0	0.146174	0.409508	0.44272	0.333709	0	0.349712	0.621385	0.739302	0.545715
AT1G15050	0	-0.0144201	1.00276	-0.0427603	-0.000401426	0.00174549	-4.06022e-05	4.28694e-221	0.182893	0.920374	0.309146	0.730685	6.39907e-221	0.405197	0.970828	0.632046	0.862229
AT1G15060	-0.133405	0.00704925	0.901665	-0.0602748	-0.00447118	-0.00299497	0.000163774	0	0.00695419	0.117609	0.0139597	0.0543846	0	0.034506	0.279291	0.105413	0.171353
AT1G15080	-1.76477e-05	0.0318489	0.945166	0.0076153	0.00570067	-0.00328621	-0.00021381	3.29822e-100	0.869663	0.341184	0.236321	0.253234	4.2972e-100	0.95512	0.557682	0.555102	0.465659
AT1G15110	-0.153449	0.123941	0.88166	-0.110206	-0.0033471	-0.00488073	-0.000142458	1.07507e-111	0.0062133	0.515977	0.0263279	0.35348	1.41733e-111	0.0314617	0.708747	0.159691	0.565795
AT1G15120	0.000250397	0.000108196	0.00100899	0.000408315	-7.30788e-05	-3.82324e-06	1.70303e-06	0.0108665	0.315054	0.159893	0.863094	0.271671	0.0113529	0.567577	0.343403	0.965086	0.485734
AT1G15125	-0.0102477	-0.0586576	0.868948	-0.0198366	0.000216812	0.000377664	0.000106859	0	0.093981	0.886232	0.558904	0.0179498	0	0.262516	0.951373	0.814831	0.0760478
AT1G15140	0.00278058	-0.000419139	0.99431	0.000189756	0.000290309	8.37705e-05	-8.72004e-06	0	0.878315	0.0671287	0.215362	0.0649436	0	0.960173	0.186774	0.531367	0.193303
AT1G15165	-0.000131294	-0.00155406	0.0005092	-0.001382	-5.90282e-05	0.000183512	2.45169e-06	0.762489	0.423989	0.789536	0.0516479	0.709843	0.773944	0.67498	0.89705	0.24543	0.849241
AT1G15170	0.0734264	0.0854683	0.930997	-0.0176116	-0.000291058	0.00200601	-0.000110584	0	0.484169	0.927993	0.144097	0.249176	0	0.727392	0.974559	0.439082	0.462145
AT1G15180	0.0270484	0.0294595	0.980552	0.00105356	-0.000779017	0.00100738	-4.07616e-05	0	0.865059	0.326039	0.00289704	0.0845793	0	0.952953	0.544354	0.0330545	0.231495
AT1G15200	0.0913619	0.18378	0.866983	0.0499317	-0.0192385	0.00177474	0.00039861	0	0.016587	5.40299e-13	0.118554	5.2482e-07	0	0.0708079	3.01561e-11	0.395303	1.04337e-05
AT1G15210	-0.00833277	-0.00145883	0.99851	-0.012711	-0.000562374	0.000412378	1.46157e-05	0	0.00148247	0.271767	0.0587646	0.33776	0	0.0094431	0.48599	0.26403	0.549838
AT1G15215	-0.10105	-0.121678	0.622356	-0.0045244	0.00942886	-0.00493482	-0.000108789	3.63791e-23	0.943995	0.25251	0.160169	0.657694	4.1094e-23	0.986655	0.464792	0.464132	0.814167
AT1G15220	-0.00865557	-0.0283828	0.950951	0.01568	0.00148474	-0.00109696	-1.35683e-06	0	0.175383	0.3159	0.0822554	0.975461	0	0.395254	0.53429	0.323091	0.994446
AT1G15240	0.0291354	0.0568106	0.697941	0.00392593	-0.00638242	0.000110287	0.000170857	5.64867e-266	0.848495	0.0152049	0.921637	0.0291868	8.73047e-266	0.94663	0.0614557	0.985406	0.108524
AT1G15290	0.0284918	0.0789406	0.981095	-0.000245092	-0.0037628	0.00101753	-1.58539e-05	0	0.985111	0.0251377	0.155574	0.751509	0	1	0.0902465	0.456262	0.87577
AT1G15350	0.031243	-0.048158	0.426446	0.0627926	0.0108108	-0.00205551	-0.000316683	5.46491e-200	1.48696e-05	5.62393e-09	0.00936206	1.00859e-08	7.98499e-200	0.000160406	1.51307e-07	0.0791415	3.09323e-07
AT1G15400	-0.00192535	-0.105861	0.0556846	0.00312008	0.00102818	-0.000274247	0.000203653	2.72204e-08	0.761444	0.434251	0.624749	2.01418e-07	2.92867e-08	0.899837	0.643711	0.855922	4.49117e-06
AT1G15410	-0.0129702	0.00503352	0.916265	-0.00141843	0.000815714	-0.000486727	-3.75312e-05	0	0.905788	0.594739	0.456615	0.411373	0	0.97371	0.769035	0.749843	0.620964
AT1G15420	-0.0248807	-0.0523466	0.872849	-0.0219656	0.00498352	-0.000133241	-7.16583e-05	0	0.0397256	0.000265383	0.819125	0.0784129	0	0.141544	0.00233112	0.94994	0.220469
AT1G15440	0.00300725	0.00201886	0.997034	0.00374556	-0.000213757	-0.000109048	6.61128e-06	0	0.0639054	0.408534	0.32276	0.390942	0	0.200537	0.620745	0.645348	0.603299
AT1G15470	-0.0241165	-0.0256965	0.934497	-0.000995237	0.00132506	-3.53812e-05	-2.44191e-05	0	0.936174	0.404662	0.958382	0.606264	0	0.983687	0.617555	0.998547	0.776947
AT1G15480	-0.00280725	-0.0029099	0.9801	-0.0160778	0.00121242	0.000326408	-2.87419e-05	0	0.0602008	0.267998	0.484324	0.378155	0	0.192503	0.482031	0.767041	0.589908
AT1G15490	-0.42047	0.0670538	0.533823	-0.529839	0.000761088	0.00835109	-0.000287623	1.22836e-35	1.82173e-33	0.892337	0.000496002	0.0860396	1.43333e-35	1.57405e-31	0.954361	0.0078981	0.234217
AT1G15500	-0.000114898	-0.00167577	0.996496	-0.00311904	0.000271716	9.79047e-05	-5.76958e-06	0	0.00399273	0.0499807	0.0976494	0.162449	0	0.0217578	0.150815	0.356553	0.354054
AT1G15690	-0.0021489	-0.00935268	0.977297	0.00150852	0.00114193	-8.43743e-05	-2.5295e-05	0	0.2146	2.09342e-13	0.203248	4.79403e-08	0	0.446978	1.22951e-11	0.518125	1.26703e-06
AT1G15800	-0.00374296	0.00405106	0.879538	0.0064921	0.000521349	-0.000324685	-3.0726e-05	0	0.59237	0.736827	0.623549	0.506231	0	0.804068	0.86758	0.855582	0.697698
AT1G15810	-0.00430823	0.0632348	0.862309	-0.0205289	-0.00403481	0.0016985	2.13015e-06	0	0.33013	0.134647	0.139692	0.978852	0	0.584044	0.305772	0.433002	0.997049
AT1G15885	-0.00166011	0.00374479	0.0218217	0.00121737	-0.00110721	-1.80727e-05	2.85803e-05	0.0739867	0.922601	0.48977	0.978907	0.549604	0.0766392	0.979858	0.689009	1	0.731774
AT1G15890	0.0393314	0.0249989	0.996621	0.00648205	-0.00280047	0.000787234	7.29597e-05	0	0.754505	0.294176	0.508599	0.371587	0	0.896188	0.511605	0.782241	0.583551
AT1G15910	0.00059206	-0.0333233	0.953956	0.0102155	0.00318834	-0.000503127	-5.54103e-05	0	0.0437294	8.67356e-07	0.0686629	0.00411181	0	0.152425	1.5526e-05	0.289437	0.0244727
AT1G15950	0.00534993	0.00298193	0.977525	0.00742671	-0.000339136	-0.000159065	1.0319e-05	0	0.0155969	0.388083	0.342426	0.378105	0	0.0672846	0.60132	0.663155	0.589908
AT1G15960	-0.0578964	-0.0879389	0.238923	-0.0254801	0.00385162	0.000486412	-2.7468e-05	7.40033e-12	0.476433	0.40019	0.803235	0.840418	8.05564e-12	0.722205	0.612943	0.942775	0.923291
AT1G15970	-0.00640795	0.0340961	0.990282	0.00860744	-0.00447503	-0.000806651	0.000121208	0	0.656752	0.070939	0.445219	0.100674	0	0.845113	0.194763	0.741153	0.260633
AT1G16010	-0.00312577	-0.04964	0.884876	0.00754066	0.00458764	-0.000555628	-7.30838e-05	0	0.38074	3.07162e-05	0.236455	0.0258463	0	0.635243	0.000355691	0.555208	0.0995947
AT1G16040	0.0386061	0.0788337	0.766515	0.0368664	-0.0019598	-0.000280521	-7.07557e-05	4.60278e-183	0.176152	0.574086	0.85035	0.495851	6.61557e-183	0.395922	0.75354	0.961971	0.689847
AT1G16060	-0.0152389	-0.0732584	0.874982	-0.000162053	0.00603733	-0.000206845	-9.88596e-05	0	0.99217	0.00426598	0.818386	0.116288	0	1	0.0227773	0.94994	0.287394
AT1G16110	0.0533295	0.072401	0.855874	0.0413945	0.0143867	-0.00115497	-0.000754587	2.92274e-293	0.0844464	2.7703e-06	0.377521	1.5715e-16	4.60284e-293	0.243315	4.39823e-05	0.690741	1.72213e-14
AT1G16190	-0.0033051	-0.00286761	0.989818	0.00403841	0.000907305	-0.000203925	-3.75418e-05	0	0.422901	0.159345	0.458219	0.0506676	0	0.67451	0.342545	0.751179	0.163073
AT1G16210	6.76681e-05	6.76681e-05	0.999985	3.83934e-05	1.17668e-06	-2.90522e-06	-6.3204e-08	0	0.5365	0.88229	0.391248	0.789526	0	0.763539	0.949675	0.699653	0.895127
AT1G16250	0.00184814	-0.0115086	0.967735	-0.00160717	0.00147956	0.000188232	-2.32822e-05	0	0.862757	0.213555	0.710551	0.511239	0	0.952193	0.414471	0.900859	0.702721
AT1G16260	-0.0618728	-0.0391682	0.845661	-0.0309329	-0.00569022	-0.000852485	0.000301657	4.97683e-216	0.263335	0.107783	0.572038	0.00421757	7.39693e-216	0.510314	0.262264	0.822848	0.0249009
AT1G16280	0.0287545	0.0341409	0.959074	0.0126043	0.000739672	0.000380287	-9.78593e-05	3.32665e-154	0.734702	0.876477	0.851334	0.49008	4.62744e-154	0.885228	0.948005	0.962026	0.685746
AT1G16300	-0.00469084	0.0209449	0.918131	0.00341729	-0.000486276	0.00191357	-0.000108952	0	0.891497	0.879409	0.161463	0.253923	0	0.96731	0.948679	0.466091	0.46633
AT1G16340	0.0193973	0.0459993	0.0697378	-0.0192556	-0.00476388	0.00108052	0.000107259	0.00115825	0.381879	0.0908531	0.368417	0.201343	0.00121846	0.635828	0.23286	0.685281	0.404578
AT1G16390	0.04727	0.204309	0.825838	-0.0738849	-0.0149977	0.00446541	0.000242412	7.0273e-139	0.0286899	0.000518619	0.0153659	0.0597146	9.60123e-139	0.110111	0.00409158	0.112173	0.182741
AT1G16430	0.0199039	0.0114154	0.989149	0.00175788	-0.00110398	-4.06472e-05	4.15947e-05	0	0.811809	0.247231	0.919788	0.143821	0	0.928059	0.457951	0.985406	0.327267
AT1G16440	-0.0738645	-0.161138	0.687479	0.00523895	0.0235561	0.00202426	-0.000807864	8.77064e-23	0.941518	0.0106923	0.60412	0.00333393	9.90237e-23	0.986415	0.0470526	0.841042	0.020704
AT1G16445	-0.0113969	-0.00882202	0.970642	-0.104027	0.0136345	0.0111932	-0.00085765	4.49122e-36	0.20879	0.185381	0.0252394	0.00925261	5.24403e-36	0.440937	0.378223	0.155556	0.0457804
AT1G16460	-0.147483	-0.0177963	0.86947	-0.0709922	0.00782437	-0.00531043	-0.000203847	0	3.8381e-05	0.000390268	1.65088e-08	0.00192823	0	0.00038194	0.00320855	9.88985e-07	0.0131765
AT1G16540	0.00838761	0.221588	0.584289	-0.0365666	-0.0106637	0.000554785	3.55939e-06	2.0033e-40	0.416791	0.0641928	0.82134	0.983458	2.36615e-40	0.66856	0.181167	0.94994	0.999474
AT1G16560	0.00202019	-0.00162644	0.988369	0.00588233	0.000157668	-0.000163582	-3.73988e-06	0	0.0222579	0.632008	0.243918	0.703019	0	0.0891307	0.797477	0.564204	0.845693
AT1G16570	-0.00714752	-0.0142908	0.954437	0.00762219	0.00240676	-0.000550068	-5.90801e-05	0	0.333106	0.0169079	0.200424	0.0490726	0	0.587035	0.0668138	0.513841	0.159561
AT1G16590	-0.0209385	-0.0491593	0.90421	0.0393511	0.00426817	-0.00104062	-8.41688e-05	1.90235e-305	0.113021	0.179111	0.442374	0.373903	3.01545e-305	0.298268	0.370329	0.73911	0.585875
AT1G16610	0.0234749	0.0439475	0.982569	0.013447	-0.00377348	8.99834e-05	6.76352e-05	0	0.0658627	5.47602e-05	0.821499	0.0152293	0	0.204501	0.000592148	0.949941	0.0675105
AT1G16650	0.0676193	0.0792344	0.336765	0.221622	0.00104758	-0.00448153	-0.000316593	2.16842e-14	9.53348e-07	0.856312	0.0692709	0.0662711	2.38558e-14	1.22733e-05	0.936793	0.290873	0.196023
AT1G16680	0.00506705	0.00549422	0.997263	0.000124547	-0.000182375	-0.000100522	6.05808e-07	0	0.978113	0.753523	0.684828	0.972075	0	1	0.878027	0.887922	0.993007
AT1G16710	-0.203078	0.00644413	0.901356	-0.0298038	0.00886658	-0.00738669	-0.000374939	1.36604e-249	0.276791	0.0114435	7.77922e-07	0.000331933	2.08727e-249	0.52763	0.0496289	3.25135e-05	0.00304673
AT1G16720	0.0229107	-0.00038139	0.837506	0.0198641	0.000117884	-0.00203128	6.21182e-05	1.57603e-198	0.487063	0.974283	0.192673	0.5686	2.29869e-198	0.72766	0.997142	0.500754	0.746448
AT1G16750	0.0141607	0.0159413	0.966384	0.00977818	-0.00194299	-0.000153334	4.26279e-05	0	0.529118	0.328345	0.856444	0.471696	0	0.758561	0.546576	0.963235	0.669404
AT1G16800	0.0889494	0.0355369	0.726139	0.120065	-0.00665825	-0.00105508	0.000144412	3.31815e-22	0.120256	0.501481	0.808077	0.628558	3.73926e-22	0.309278	0.696833	0.945144	0.79304
AT1G16825	-0.00177708	-0.0462012	0.855587	-0.0547202	0.00631874	0.00183463	-0.000115821	0	0.00544871	0.0121281	0.0876315	0.122803	0	0.0282528	0.0519214	0.334377	0.297844
AT1G16870	-0.00178536	-0.00338133	0.987065	0.000513239	-0.000301093	1.68732e-05	1.4114e-05	0	0.907314	0.593442	0.944065	0.400973	0	0.974117	0.768285	0.991176	0.611524
AT1G16880	0.0393237	0.0654436	0.961186	0.00925845	-0.00870879	0.00141957	0.000205761	0	0.0780173	2.15717e-38	7.3073e-07	9.22742e-25	0	0.230689	1.93843e-35	3.10438e-05	2.51265e-22
AT1G16890	0.00147764	-0.01103	0.976933	0.0102813	0.00117017	-0.000380443	-2.1743e-05	0	4.37833e-08	1.11391e-06	0.000204404	0.00238756	0	7.02565e-07	1.9277e-05	0.00377938	0.0156889
AT1G16916	-0.00278922	0.000210055	0.991321	-0.00402662	0.000243367	-4.72591e-05	-6.01933e-06	0	0.143517	0.479182	0.746159	0.552676	0	0.345564	0.68121	0.917337	0.734016
AT1G16930	0.00461639	0.00290638	0.99825	-0.000208629	-0.000663583	4.94152e-05	2.18255e-05	0	0.961227	0.226827	0.832835	0.182172	0	0.994999	0.432753	0.955611	0.380577
AT1G16960	-8.11831e-05	-0.10817	0.388866	-0.0712084	0.00724168	0.00375211	-5.51822e-05	5.56149e-25	0.065393	0.14303	0.0751324	0.707986	6.31164e-25	0.203823	0.317981	0.306347	0.849053
AT1G16970	-0.0426342	-0.0394905	0.94505	0.0140044	0.000885399	-0.00161102	4.16292e-05	0	0.412005	0.68519	0.0836506	0.522364	0	0.663371	0.834976	0.326535	0.711886
AT1G17020	0.0005836	0.00409888	0.98431	-0.00252063	0.000203731	0.000218201	-8.68384e-06	0	0.777135	0.858082	0.653325	0.798102	0	0.90787	0.937832	0.873746	0.89957
AT1G17040	0.0363939	0.0289696	0.976762	-0.00778917	0.000197018	0.00169169	-8.24617e-05	0	0.657422	0.930135	0.0774794	0.218103	0	0.845316	0.975593	0.311509	0.424865
AT1G17050	0.00871802	0.00774071	0.978973	-0.00127682	0.00075134	-7.52305e-05	-2.76147e-05	0	0.85153	0.389326	0.839804	0.288293	0	0.94795	0.602356	0.958193	0.503441
AT1G17080	-0.000285691	-0.000724315	0.996361	0.000455567	3.79667e-05	-2.90808e-05	5.33484e-07	0	0.142587	0.339539	0.08623	0.652418	0	0.343971	0.555957	0.331989	0.810178
AT1G17140	-0.00251763	0.00154552	0.983586	-0.0032933	-0.000405113	9.21867e-05	3.19752e-06	0	0.471509	0.488762	0.711793	0.854495	0	0.718133	0.688672	0.901123	0.930727
AT1G17145	-0.0387419	-0.352773	0.256305	0.012694	0.0181917	-0.00123148	6.95316e-05	9.77095e-15	0.708578	2.83135e-05	0.506267	0.591229	1.07653e-14	0.87211	0.000330422	0.781838	0.764759
AT1G17160	-0.00515166	-0.00276243	0.994934	-0.00488041	-2.66334e-05	0.000107274	4.62138e-06	0	0.0820395	0.940872	0.483521	0.665771	0	0.239275	0.981276	0.766517	0.820661
AT1G17220	0.00869206	0.0230284	1.00142	-0.00581986	-0.0017023	0.000455364	2.35337e-05	0	0.200139	0.00340089	0.0661418	0.174151	0	0.429942	0.0189581	0.283862	0.370221
AT1G17230	0.0143579	-0.0199353	0.949137	0.0246248	0.00192472	-0.000622521	-2.16197e-05	0	0.00355447	0.0749197	0.17673	0.501966	0	0.0197774	0.20278	0.480202	0.694804
AT1G17255	0.0130536	-0.132073	0.230528	-0.0612538	0.0106759	0.00683796	-0.000245586	8.36501e-06	0.214312	0.0918858	0.010484	0.178778	8.90299e-06	0.446615	0.234599	0.0858437	0.376318
AT1G17270	-0.0314227	-0.0680995	0.887335	-0.0401882	0.00498097	0.00158557	-5.83871e-05	3.63312e-233	0.150045	0.163207	0.297899	0.583305	5.48325e-233	0.356731	0.348687	0.621118	0.758757
AT1G17280	0.0210313	0.0165126	0.9655	0.00549762	-0.000395049	0.000434819	-1.44641e-05	0	0.363487	0.609777	0.187678	0.530543	0	0.619784	0.779302	0.49388	0.717091
AT1G17285	-0.0152164	-0.0103277	-0.0091033	0.00999101	0.00383471	-0.000642291	-0.000114374	0.635603	0.625479	0.125727	0.544251	0.123389	0.646467	0.824974	0.291407	0.80961	0.298781
AT1G17330	0.0114812	0.0368489	0.814562	0.0152951	0.00856986	0.00116379	-0.00049467	0	0.447528	0.000880031	0.289436	1.16413e-10	0	0.696657	0.00635177	0.613268	4.84301e-09
AT1G17410	0.106275	0.142225	0.33517	0.0751822	-0.0104368	0.00175233	0.000114301	8.38035e-18	0.0602281	0.0414608	0.422072	0.453607	9.32349e-18	0.192503	0.131185	0.722977	0.655529
AT1G17430	-0.0242261	0.0285554	0.990715	-0.0232604	-0.00140396	-0.00014994	1.12931e-05	0	0.0552532	0.365826	0.820813	0.807128	0	0.180285	0.580284	0.94994	0.9057
AT1G17440	0.0123115	0.0231255	0.998077	-0.00607121	0.000802009	0.000586946	-8.72591e-05	0	0.361234	0.345837	0.105668	0.000576788	0	0.617448	0.561868	0.370623	0.00481693
AT1G17460	0.0040386	0.0081693	0.991201	-0.0613468	0.0011102	0.00201429	-3.87158e-05	0	0.00981437	0.71177	0.114252	0.666353	0	0.0466377	0.850473	0.388797	0.821069
AT1G17470	0.00828527	0.00661124	0.995302	0.00366003	-0.000531006	0.00014253	7.97834e-06	0	0.0848167	0.0506673	0.218622	0.324388	0	0.24397	0.152171	0.535005	0.537462
AT1G17500	-0.016678	-0.0555521	0.869232	0.00722561	0.00331509	0.000119882	-5.39899e-05	1.46057e-158	0.827901	0.435641	0.947287	0.670028	2.0418e-158	0.936176	0.645563	0.992922	0.823819
AT1G17520	-0.0304834	-0.0288956	0.947636	-0.0187425	0.0014028	-0.000216569	-2.35708e-06	0	0.00524132	0.102424	0.554303	0.926617	0	0.0273829	0.2532	0.812148	0.97088
AT1G17550	-0.00207877	0.0117319	0.703113	-0.0133427	-0.00491054	0.000894181	0.000195046	2.83347e-119	0.667545	0.216628	0.597751	0.0995441	3.77544e-119	0.850202	0.41855	0.838337	0.258751
AT1G17560	0.0227266	-0.00902286	0.927026	0.0198724	0.00352032	-0.00104678	-7.46487e-05	0	0.211403	0.0835693	0.227563	0.218153	0	0.443407	0.219065	0.543707	0.424865
AT1G17590	-0.254482	0.0892104	0.92546	-0.134006	-0.00961116	-0.00195061	5.99852e-05	9.78006e-59	0.0225618	0.201051	0.54282	0.788841	1.19488e-58	0.0898274	0.398909	0.808784	0.894903
AT1G17650	-0.0623014	0.00318731	0.951851	-0.112097	0.00458825	0.000723983	-0.000156976	9.6854e-294	2.37146e-05	0.180645	0.617554	0.124613	1.52582e-293	0.000245789	0.372395	0.850343	0.300909
AT1G17665	-0.0308735	0.0331996	0.977448	-0.0184341	0.00123641	-0.000958478	-0.000113479	0	0.0248931	0.239634	0.0325312	0.000292137	0	0.0976557	0.449177	0.184131	0.00273219
AT1G17680	-0.0244463	-0.0131515	0.965885	-0.0357283	0.00138976	0.000793726	-3.17341e-05	0	0.0353898	0.522407	0.391591	0.623997	0	0.129695	0.713644	0.699751	0.79051
AT1G17690	-0.0553493	0.00864654	0.968936	0.000367595	0.0012801	-0.00248139	-5.69299e-05	0	0.981094	0.518922	0.00336529	0.335678	0	1	0.711696	0.0366107	0.547839
AT1G17730	0.000386689	0.0172857	0.912675	0.00240166	0.00235447	-3.87535e-05	-0.000131916	0	0.779353	0.0318136	0.933958	5.42017e-05	0	0.908781	0.107797	0.989176	0.000654645
AT1G17780	0.0194791	-0.00566324	0.939078	0.011722	-0.00128797	-0.000370835	8.11396e-05	0	0.382417	0.453184	0.6125	0.11274	0	0.636253	0.660817	0.847149	0.281411
AT1G17830	0.00617406	-0.0555698	0.850263	0.0817104	0.00460636	-0.00392736	-8.76188e-05	2.44907e-93	0.0454212	0.387204	0.0758158	0.574353	3.15834e-93	0.156922	0.600417	0.307715	0.751767
AT1G17840	-0.0239755	0.00122488	0.982945	-0.0163749	-0.00219972	5.8328e-05	6.67399e-05	0	0.015606	0.0111225	0.874552	0.00973169	0	0.0672916	0.0485139	0.968985	0.0474416
AT1G17850	0.0251545	-0.0621798	0.699184	0.0511577	0.00264177	-0.00265625	5.0756e-05	1.31987e-152	0.0605531	0.448756	0.0740653	0.625234	1.83313e-152	0.193228	0.656869	0.304182	0.79098
AT1G17880	-0.000997444	-0.000525641	0.997358	-0.000426297	0.000128737	-2.46235e-05	-4.07407e-06	0	0.40274	0.0482677	0.375658	0.0359325	0	0.656095	0.14668	0.690179	0.127072
AT1G17890	-0.0112848	-0.0128015	0.91177	0.0152221	0.00213357	-0.000857579	-6.85188e-05	0	0.2163	0.175568	0.201659	0.144305	0	0.448575	0.365236	0.515746	0.327492
AT1G17940	-0.0291413	0.0172538	0.829412	-0.0420584	-0.00999859	0.00194689	0.000360963	1.24925e-274	0.0800823	0.00114556	0.137524	8.13668e-05	1.9452e-274	0.234863	0.00790024	0.430242	0.000923357
AT1G17950	0.00785753	-0.0193902	0.888615	0.00235652	0.000526088	0.000439766	2.19062e-05	1.20054e-168	0.944158	0.90161	0.808999	0.863107	1.70079e-168	0.986655	0.958914	0.945586	0.935571
AT1G17960	-0.0594765	-0.0123107	0.152162	-0.00817557	0.00153978	-0.002684	-4.55777e-05	0.000182793	0.844639	0.772985	0.238295	0.774435	0.000193313	0.945903	0.888241	0.557985	0.886958
AT1G17970	-0.0261728	0.00262874	0.695599	-0.0394079	0.000842483	0.000704998	-2.10905e-05	3.66521e-158	0.138949	0.804711	0.627509	0.835433	5.11978e-158	0.338978	0.90593	0.857481	0.920181
AT1G17980	-0.000756241	-0.00952787	0.981824	0.000902815	0.000636312	-1.57411e-05	-3.30054e-06	0	0.803441	0.170335	0.936598	0.811344	0	0.923462	0.358215	0.989218	0.907711
AT1G17990	0.0128053	0.0123884	0.983104	0.00757452	-0.00105977	-5.26105e-05	2.29694e-05	0	0.517812	0.479421	0.934377	0.606934	0	0.749671	0.681227	0.989176	0.777354
AT1G18020	-0.0245867	0.0885965	0.750323	-0.0656141	-0.0114076	0.000991934	0.000222874	2.9398e-143	0.0298338	0.00315806	0.547196	0.0529169	4.0393e-143	0.113644	0.0178817	0.809929	0.167841
AT1G18030	0.135428	-0.0141895	0.814498	0.17436	-0.0020061	-0.00312784	0.000182326	1.33282e-280	8.0694e-14	0.501783	0.0140467	0.040478	2.08145e-280	2.5004e-12	0.697128	0.105893	0.138859
AT1G18040	-0.00192166	-0.0539202	0.836608	0.0180824	0.0121312	-0.00103492	-0.000367197	2.33389e-164	0.564869	0.00254112	0.545913	0.0021671	3.28926e-164	0.784895	0.0151022	0.809929	0.0145325
AT1G18060	0	0						1	1	1	1	1	1	1	1	1	1
AT1G18090	-0.0427793	0.0187654	0.674904	0.0195124	0.0194314	-0.00421843	-0.000744606	1.67828e-24	0.773417	0.0250286	0.253894	0.00395081	1.90273e-24	0.905898	0.090035	0.575698	0.0237471
AT1G18160	-0.0438689	0.135134	0.734405	-0.0358358	0.000468355	0.000766893	-0.000352392	0	0.0539556	0.843932	0.449658	6.6507e-07	0	0.176951	0.929636	0.744817	1.28523e-05
AT1G18190	0.0124189	0.0122353	0.963875	0.0149278	-0.000266925	-0.000281635	-1.32567e-05	0	0.235106	0.868206	0.681363	0.782095	0	0.472949	0.944292	0.8867	0.891378
AT1G18210	0.0624018	-0.0308522	0.508707	-0.0226795	-0.00469937	0.00383967	0.000232916	9.86602e-56	0.49432	0.268342	0.0339219	0.0655863	1.19935e-55	0.733117	0.48236	0.189067	0.194958
AT1G18250	-0.000301438	-0.0137252	0.970582	-0.000371403	0.00152508	0.00016474	-3.27547e-05	0	0.957887	0.0901183	0.667677	0.221848	0	0.993143	0.231515	0.878055	0.42846
AT1G18260	-0.000168351	-0.00173921	0.98784	0.00462385	0.00136123	-0.000266174	-5.18694e-05	0	0.124429	0.000407225	0.104965	6.14717e-06	0	0.314963	0.00333576	0.369968	9.82892e-05
AT1G18270	-0.0533638	0.00310575	0.985157	-0.0507974	0.00140295	-0.00059395	-5.42869e-05	0	5.97209e-18	0.0623764	0.0642691	0.0155113	0	2.56771e-16	0.177167	0.27827	0.0684938
AT1G18280	-0.0331902	-0.0123831	0.873396	-0.172545	0.00188707	0.00557068	4.0881e-05	2.23454e-167	1.0959e-07	0.649891	0.00167515	0.741377	3.16064e-167	1.61704e-06	0.810787	0.0213516	0.869375
AT1G18360	0.00565438	0.0522037	0.933539	-0.00286616	0.00217967	-0.00085917	-0.000172367	0	0.893094	0.424396	0.460246	0.0339971	0	0.968075	0.634863	0.752231	0.122004
AT1G18390	-0.00810955	-0.0137695	0.960558	-0.00275352	0.000622955	-0.000162225	7.83999e-06	0	0.554297	0.295718	0.52308	0.65873	0	0.777174	0.512601	0.794254	0.815
AT1G18400	0.0022468	0.00180877	0.933141	0.00854349	-0.000528404	-0.000310441	2.66762e-05	0	0.194763	0.530788	0.387794	0.288224	0	0.422331	0.719407	0.696804	0.503441
AT1G18415	0.0032681	0.0348516	0.0627786	-0.0101976	-0.0048977	0.00066988	0.000117411	6.5134e-17	0.185839	6.8217e-07	0.111153	6.44804e-05	7.23032e-17	0.4091	1.24847e-05	0.382261	0.000758405
AT1G18440	-0.0172563	0.00360361	0.933347	-0.00817039	0.0046847	-0.000148141	-0.000212374	0	0.567151	0.0104764	0.853546	0.000117873	0	0.786484	0.0463417	0.963037	0.00126059
AT1G18460	-0.0830755	-0.1892	0.643266	-0.000621563	0.00764634	-0.00246157	7.92484e-05	1.61431e-77	0.985995	0.0914505	0.202569	0.557145	2.03595e-77	1	0.233857	0.516833	0.737878
AT1G18470	-0.0137927	0.0538489	0.714587	-0.0391265	-0.0028897	0.00229097	7.15895e-06	9.33083e-133	0.190667	0.450006	0.160164	0.949919	1.26389e-132	0.415958	0.65794	0.464132	0.983355
AT1G18500	0.00128819	-0.00946149	0.982902	-0.00617233	0.000877107	0.000300503	-1.39162e-05	0	0.0235917	0.0119277	0.0433644	0.180624	0	0.0931437	0.0513323	0.221028	0.379088
AT1G18550	0.0918071	0.0893269	1.0084	-0.000311582	-0.00635219	0.00198007	0.000116064	7.94664e-288	0.991242	0.0833302	0.20199	0.288756	1.24687e-287	1	0.218815	0.516321	0.503502
AT1G18560	-0.025804	-0.00853351	0.985757	-0.0208557	0.0010912	0.000214376	-3.1879e-05	0	0.220898	0.618494	0.820376	0.625728	0	0.453609	0.786331	0.94994	0.791273
AT1G18620	-0.0637931	0.0641301	0.961066	-0.0193388	-0.0084059	-0.000888883	0.000153128	0	0.254636	0.000108765	0.337167	0.0179734	0	0.50113	0.00107402	0.659895	0.0761118
AT1G18640	0.00168478	-0.0159978	0.956216	0.00381859	0.00248529	0.000121299	-6.36745e-05	0	0.543742	0.00201069	0.72369	0.00791092	0	0.76946	0.012478	0.907691	0.0402762
AT1G18650	-0.0162563	-0.00348447	0.797095	-0.0349151	-6.2876e-05	0.00145553	1.59347e-05	0	0.0784721	0.980241	0.17875	0.833152	0	0.231805	0.99963	0.482792	0.919218
AT1G18660	-0.0658787	-0.0190514	0.865162	-0.0126508	0.00709631	-0.0019539	-0.000272423	0	0.580624	0.0154261	0.117795	0.00180341	0	0.795228	0.0621054	0.394502	0.012418
AT1G18670	-0.00607103	-0.0162178	0.945954	0.0148765	0.000769205	-0.00078126	2.71202e-06	0	0.103801	0.510917	0.117366	0.937994	0	0.281204	0.704697	0.393937	0.9768
AT1G18690	0.00313	0.00453929	0.994099	0.00631487	-0.000139247	-0.0003138	1.64812e-06	0	0.234329	0.837595	0.278682	0.935106	0	0.471597	0.926012	0.601705	0.97481
AT1G18700	0.000154581	0.0547875	0.96195	-0.0216673	-0.00525616	0.00150798	7.64643e-05	0	0.154714	0.00697058	0.0694511	0.187705	0	0.364228	0.0338399	0.291221	0.388007
AT1G18720	-0.019606	-0.0462476	0.889428	-0.0320053	0.005822	0.000635323	-0.000128497	0	4.63063e-08	7.84544e-15	0.0467553	8.63302e-09	0	7.37781e-07	5.38161e-13	0.23229	2.69362e-07
AT1G18730	-0.0179398	-0.00328156	0.977578	-0.0370939	0.000220634	0.000857515	-4.4357e-06	0	2.26061e-12	0.744245	0.0029432	0.825774	0	6.10024e-11	0.87254	0.0333081	0.916552
AT1G18880	-1.2491e-05	-0.000604029	0.997704	-0.0017534	0.000156492	0.000109493	-6.7296e-06	0	0.163484	0.331023	0.110707	0.16064	0	0.376685	0.546576	0.381888	0.352047
AT1G18890	-0.00662352	0.0573122	0.712278	-0.00305186	-0.00229849	2.61174e-05	-4.69708e-05	2.00805e-125	0.92075	0.558106	0.987548	0.687923	2.69601e-125	0.979858	0.742043	1	0.834864
AT1G18910	-0.0369548	0.0209744	0.968648	-0.0093868	9.33816e-06	-0.000493054	-6.9004e-05	0	0.685747	0.99749	0.69684	0.435224	0	0.858594	1	0.894269	0.640911
AT1G19010	0.00412394	0.0746057	0.813607	0.0281744	0.0117571	-0.00133663	-0.000677627	2.9987e-156	0.368699	0.00336882	0.434385	1.41652e-08	4.17708e-156	0.624294	0.0188143	0.732171	4.20095e-07
AT1G19025	0.028393	0.178228	0.620185	0.0417954	0.0333749	-0.00687289	-0.0015883	1.69648e-16	0.586454	0.000814971	0.107483	9.47245e-08	1.88135e-16	0.799435	0.00595877	0.375084	2.32567e-06
AT1G19050	-0.00140631	0.00202549	0.0184735	0.00368538	-0.000648842	-0.000126312	9.16229e-06	7.46349e-07	0.335869	0.185407	0.545444	0.530256	7.9813e-07	0.590283	0.378223	0.809707	0.717091
AT1G19100	0.0142766	0.0139035	0.82816	-0.00385787	0.00170961	-0.00111055	-4.85547e-05	1.57041e-66	0.937638	0.786395	0.679722	0.796167	1.9443e-66	0.983994	0.89647	0.885086	0.898488
AT1G19110	-0.00199188	-0.00435662	0.986499	-0.00543521	0.000785825	0.000139671	-2.02484e-05	0	0.0830594	0.050159	0.414264	0.090306	0	0.241298	0.151201	0.716846	0.241851
AT1G19120	-0.00606294	-0.00376416	0.955548	-0.00407544	0.000917527	-0.000292712	-2.97213e-05	0	0.583481	0.334624	0.470373	0.294205	0	0.797561	0.551123	0.757671	0.509388
AT1G19130	0.044966	-0.044226	0.741437	0.0644745	-0.00100282	-0.0010272	0.000164321	0	6.34719e-05	0.626814	0.242806	0.00749708	0	0.000594743	0.793047	0.562768	0.0386373
AT1G19140	0.023815	-0.00182763	0.846532	0.0146694	0.00849937	0.000389401	-0.000341702	0	0.407816	0.000177887	0.687122	4.23996e-07	0	0.660401	0.0016651	0.889437	8.67887e-06
AT1G19150	0.00519672	0.005196	0.995262	0.00266897	-2.24089e-05	-7.10813e-05	-6.20486e-06	0	0.433873	0.959042	0.70243	0.633178	0	0.685199	0.989769	0.896469	0.795948
AT1G19170	-0.002881	0.00027687	0.986215	0.00314477	8.76692e-05	-0.000218296	-1.35228e-06	0	0.549317	0.896193	0.446121	0.946149	0	0.773451	0.956627	0.741865	0.98178
AT1G19180	-0.0018304	-0.00923757	0.962061	0.000623691	0.000340247	-0.000280888	1.11465e-05	0	0.917554	0.658935	0.392801	0.627467	0	0.978533	0.816716	0.700362	0.792459
AT1G19220	-0.00669106	0.00793296	0.966829	-0.0230005	-0.00202231	0.000772121	7.98469e-05	0	0.0487324	0.175586	0.225207	0.0726789	0	0.164628	0.365236	0.541533	0.209593
AT1G19270	0.0653453	0.00818043	0.795807	0.018153	0.00160435	-0.00170973	4.6056e-05	1.54033e-130	0.588832	0.708861	0.350724	0.719039	2.08048e-130	0.801218	0.848179	0.671842	0.854894
AT1G19330	-0.0303429	-0.0602199	0.85518	0.0438288	0.00671542	-0.00354023	-9.49036e-05	3.21339e-149	0.193698	0.119588	0.0543077	0.46036	4.44444e-149	0.420794	0.282349	0.252332	0.660302
AT1G19340	0.021425	0.174043	0.637201	0.123765	-0.0269976	-0.00168993	0.000530237	6.40605e-16	0.131064	0.00938167	0.715441	0.094495	7.091e-16	0.325812	0.0425456	0.902436	0.250241
AT1G19350	-0.0018848	-0.00108538	0.998162	-0.000548268	2.41321e-05	-1.45225e-05	-1.54215e-06	0	0.734579	0.907146	0.869247	0.802462	0	0.885228	0.962752	0.966236	0.903194
AT1G19400	0.000722348	0.000464302	0.964096	0.000296957	2.85951e-05	7.34864e-05	-5.11767e-06	0	0.930794	0.947884	0.693622	0.694606	0	0.982164	0.984497	0.893094	0.839487
AT1G19430	0.012097	-0.0156821	0.949065	0.0128804	0.00163332	8.12927e-05	-3.64229e-05	0	0.0806349	0.08336	0.839831	0.195006	0	0.236098	0.218815	0.958193	0.396879
AT1G19450	-0.0246524	0.00310643	0.983671	0.00631247	0.00318013	-0.00173627	-0.000126603	0	0.41552	0.00134555	4.04058e-05	1.83805e-05	0	0.666761	0.00896968	0.0009589	0.000254495
AT1G19480	-0.0102284	-0.0217285	0.95482	0.00402152	0.00115569	-0.000807678	2.39719e-06	0	0.687803	0.366742	0.139048	0.949898	0	0.859969	0.580815	0.432199	0.983355
AT1G19485	0.00712171	-0.0823734	0.229875	0.0643074	-0.00316571	-0.00154359	0.000275197	4.11041e-15	0.0322733	0.410059	0.346184	0.0162409	4.53372e-15	0.12114	0.621901	0.667699	0.0708384
AT1G19520	-0.00743754	-0.00781847	0.983194	-0.00202226	0.00069843	-3.56272e-05	-1.18067e-05	0	0.617776	0.177969	0.871979	0.444724	0	0.820523	0.368912	0.967717	0.648222
AT1G19530	-0.0102008	-0.00837322	0.958612	-0.00745398	0.00197431	-1.38891e-05	-5.67747e-05	0	0.0927476	0.000501059	0.954213	0.00078271	0	0.259908	0.00397398	0.996094	0.0062216
AT1G19540	0.0488403	0.0231752	0.314267	0.0599187	-0.00316804	-0.000487591	7.05319e-05	6.20791e-41	0.012774	0.303478	0.710325	0.441964	7.3381e-41	0.0575952	0.520131	0.900859	0.645978
AT1G19580	0.00181111	-0.000444027	0.976296	-0.0061662	0.000660555	0.000246449	-1.79969e-05	0	0.162892	0.242656	0.306636	0.285358	0	0.376188	0.451918	0.629094	0.50024
AT1G19650	-0.394031	0.0709295	0.875581	-0.303555	-0.0255002	-0.00184282	0.000828762	3.28685e-67	4.81891e-09	0.000121428	0.514819	2.76426e-05	4.07613e-67	8.64326e-08	0.00118218	0.786628	0.000366367
AT1G19710	-0.00656479	-0.14435	0.700234	-0.00763839	0.0168473	-0.000586192	-0.000314908	3.04324e-122	0.802582	1.63316e-05	0.725071	0.00685597	4.06882e-122	0.923462	0.000202701	0.908441	0.0362825
AT1G19715	-0.0605831	-0.0155771	0.896815	-0.0203389	-0.00622756	-0.000678166	0.000262195	5.93483e-175	0.533028	0.135725	0.703194	0.0350218	8.46245e-175	0.761613	0.307206	0.896843	0.124685
AT1G19860	-0.0694381	0.0480818	0.869745	-0.0118431	0.0083927	-0.00141334	-0.000530443	2.92297e-264	0.644832	0.0106746	0.31329	6.10099e-08	4.51303e-264	0.83735	0.0470507	0.636188	1.57993e-06
AT1G19870	-0.000583899	-0.0208443	0.84807	-0.0241914	0.0016572	0.00195766	-2.55083e-05	0	0.0875861	0.360369	0.0112775	0.636561	0	0.249698	0.574978	0.0907245	0.798344
AT1G19880	-0.006093	0.0014321	0.992048	0.00327379	0.00124488	-0.000357047	-5.88664e-05	0	0.489832	0.0401242	0.167414	0.00112461	0	0.730318	0.128038	0.473525	0.00852083
AT1G19910	-0.000231676	0.000449277	0.99896	0.000254055	-0.000102763	-1.02225e-05	2.89483e-06	0	0.483644	0.0267944	0.605416	0.0362888	0	0.727392	0.094644	0.842138	0.127929
AT1G19970	-0.00649632	-0.0917855	0.835353	-0.00610551	0.00502845	0.000401296	-1.64314e-05	1.94407e-181	0.837856	0.187738	0.80526	0.885131	2.78842e-181	0.942184	0.381246	0.943671	0.94733
AT1G19980	0.0135676	0.0194899	0.984251	0.00165471	-0.000649815	0.00093193	-4.38044e-05	0	0.924997	0.772613	0.331112	0.513274	0	0.980591	0.888046	0.654216	0.704606
AT1G19990	0.00458175	-0.0253716	0.924354	-0.00378313	0.00299939	0.000510066	-6.93153e-05	0	0.741921	0.0412823	0.415725	0.113474	0	0.88974	0.130851	0.718101	0.282532
AT1G20020	-0.0205063	-0.101259	0.790537	-0.0317905	0.0105961	0.000641953	-0.000183103	0	0.0039766	6.24168e-14	0.286411	1.35283e-05	0	0.0216831	3.94984e-12	0.609589	0.000193885
AT1G20030	-0.0214687	-0.107186	0.765784	-0.112437	0.0218699	0.00465421	-0.000539742	3.48768e-91	0.00375186	1.05171e-05	0.0278693	0.000262563	4.48808e-91	0.0206456	0.00013837	0.165084	0.00249936
AT1G20050	-0.0133384	-0.00679463	0.984862	-0.0207673	0.000136144	0.00047975	3.12102e-06	0	6.06949e-08	0.781355	0.0218057	0.830902	0	9.40352e-07	0.894001	0.14047	0.9185
AT1G20060	-0.246885	0.0286839	0.904024	-0.298342	0.00294727	0.00245335	-0.000161632	1.62627e-43	1.98012e-05	0.752181	0.603318	0.610323	1.93379e-43	0.000208598	0.877463	0.84079	0.77936
AT1G20090	-0.0670705	-0.024855	0.925717	-0.0210786	0.000572566	-0.00172079	2.67397e-05	0	0.0233092	0.630097	0.00068781	0.450346	0	0.0921497	0.796072	0.0104403	0.652929
AT1G20100	0.00709807	-0.301529	0.00686075	0.0388081	0.0177211	-0.00149263	9.41151e-06	0.774949	0.11493	1.84045e-08	0.266395	0.920117	0.786325	0.30097	4.45776e-07	0.588238	0.96749
AT1G20110	-0.144874	-0.0112396	0.942039	-0.0880359	0.000159073	-0.00104058	-1.18404e-05	0	1.60427e-12	0.920518	0.125827	0.803155	0	4.35529e-11	0.970866	0.409216	0.90357
AT1G20160	0.0156009	0.0134836	0.962901	0.0157589	0.00298954	-0.00167419	-0.000106718	0	0.478025	0.292807	0.167086	0.207546	0	0.723501	0.510409	0.473525	0.411757
AT1G20190	0.00194013	0.00888584	0.954326	0.00230119	-0.00119796	2.40888e-05	1.24932e-05	0	0.803636	0.311675	0.961947	0.723259	0	0.923462	0.530037	0.998762	0.857188
AT1G20260	0	-9.48806e-05	0.999899	6.43338e-05	-1.06085e-06	1.63967e-06	1.65972e-08	0	0.610228	0.947617	0.811768	0.972481	0	0.815734	0.984497	0.946974	0.993007
AT1G20270	-0.0679737	-0.00170718	0.926127	-0.0312491	-0.00219209	-0.00126796	9.49758e-05	0	0.122983	0.39774	0.251313	0.218809	0	0.313591	0.611051	0.572881	0.425404
AT1G20380	-0.0750469	0.0177664	0.883159	-0.159056	0.0094718	0.00544128	-0.000411271	1.22914e-63	0.00311232	0.168804	0.0637534	0.0449314	1.51427e-63	0.0178477	0.356492	0.277487	0.149983
AT1G20410	-0.0719944	0.0595197	0.969896	0.0296548	0.00345441	-0.00391216	-0.000301162	3.08275e-210	0.356408	0.401097	0.0257388	0.0140161	4.55468e-210	0.612756	0.613677	0.157447	0.0636106
AT1G20480	-0.0186651	-0.0189879	0.930111	0.0202687	-0.000622036	-0.00116381	4.38168e-05	0	0.376622	0.832045	0.352081	0.616102	0	0.632112	0.922713	0.67333	0.783623
AT1G20510	-0.0470022	0.0225191	0.96876	-0.0504967	-0.000422947	0.000936244	-3.07805e-05	0	0.00161543	0.836464	0.283898	0.614135	0	0.0101654	0.925331	0.607212	0.782561
AT1G20540	-0.119956	0.0397655	0.829337	-0.0365756	0.00601298	-0.00460821	-0.000313738	0	0.0906457	0.0296944	9.32135e-05	0.000140521	0	0.255916	0.102353	0.00195705	0.00146658
AT1G20550	-0.184894	-0.017816	0.779455	-0.0398872	-0.00666377	-0.00449212	0.000241431	1.39508e-46	0.474693	0.35058	0.140012	0.256352	1.66816e-46	0.720813	0.565921	0.433188	0.468313
AT1G20560	-0.060877	-0.00380604	0.92546	-0.0616727	-0.0112902	0.000310431	0.00040377	2.0318e-103	0.160701	0.044739	0.897023	0.0159941	2.66109e-103	0.372771	0.138669	0.978709	0.0701431
AT1G20575	-0.000815688	-0.00140692	0.998325	0.00072882	0.000154654	-6.08265e-05	-3.84531e-06	0	0.380517	0.145819	0.179735	0.224856	0	0.635209	0.322106	0.484142	0.432205
AT1G20580	7.75294e-05	-0.000191989	0.999517	0.000105399	3.39293e-05	1.35771e-05	-1.41473e-06	0	0.831694	0.592828	0.615787	0.454265	0	0.938349	0.767822	0.849021	0.655958
AT1G20620	-0.00148591	-0.00174693	0.994701	-0.000439287	7.54872e-05	-1.68121e-05	8.71404e-07	0	0.258721	0.129281	0.428175	0.556728	0	0.506066	0.297115	0.727056	0.737653
AT1G20630	-0.000599321	-0.00387482	0.992813	-0.00282533	0.000465914	8.70379e-05	-1.02183e-05	0	0.0045063	0.000251247	0.108732	0.00704439	0	0.024089	0.00222874	0.377537	0.0369532
AT1G20640	0.146912	-0.0983873	0.0614078	0.101659	-0.00618634	0.00131601	0.00041213	0.442907	0.215655	0.555916	0.768906	0.187923	0.452938	0.447898	0.740003	0.927596	0.388023
AT1G20650	-0.0310395	-0.0492141	0.920503	-0.0190588	0.00168976	-3.34517e-05	3.33377e-05	0	0.0220644	0.11265	0.941287	0.293518	0	0.0884349	0.270733	0.991018	0.50869
AT1G20670	-0.0180405	0.00986061	0.966358	0.0270852	-0.00449859	-0.00129486	0.000137722	0	0.0789602	0.0225743	0.123691	0.0191172	0	0.232635	0.0834442	0.405801	0.0796481
AT1G20693	0.00252211	0.00458292	0.992957	-0.00363025	0.000471994	0.000386511	-3.43689e-05	0	0.0015758	0.00131992	6.92465e-10	4.2029e-15	0	0.00996136	0.00884186	5.14256e-08	3.70267e-13
AT1G20696	-0.10162	-0.00239578	0.968994	-0.050564	0.00334228	-0.00284487	-0.000104162	0	9.25137e-14	0.000118316	1.53595e-14	5.66145e-05	0	2.8568e-12	0.00115563	2.37966e-12	0.000678318
AT1G20700	0.0129158	-0.0240671	0.930404	0.0159603	0.00128856	0.000104813	-6.52672e-06	0	0.367924	0.566887	0.914316	0.922676	0	0.623569	0.749125	0.984426	0.968933
AT1G20770	-0.0082747	-0.00344327	0.938495	-0.0103261	0.00310844	0.000454437	-0.000136376	0	0.17953	0.00158849	0.278922	3.31889e-06	0	0.400908	0.0102914	0.602063	5.59542e-05
AT1G20780	0.00256701	-0.00378824	0.980695	0.00882749	-0.000181942	-8.25499e-05	1.13617e-05	0	0.023912	0.715976	0.698647	0.44573	0	0.0941169	0.853171	0.894974	0.648847
AT1G20810	-0.0492387	0.0628112	0.906755	-0.0414585	0.00161142	-0.00173504	-0.00017809	0	0.0134324	0.452644	0.0579069	0.00534223	0	0.0598135	0.660624	0.261525	0.0297985
AT1G20830	-0.0182687	0.00707035	0.91119	0.000590787	0.00225328	7.87114e-05	-0.000132696	0	0.973392	0.320075	0.935079	0.0493909	0	1	0.537901	0.989176	0.16011
AT1G20850	0.000322286	-0.00410218	0.990669	-0.00200094	0.000676457	3.35024e-05	-1.99074e-05	0	0.348987	0.0133336	0.773776	0.0145146	0	0.604471	0.0558843	0.929229	0.0651781
AT1G20880	-0.136018	0.0515753	0.919246	-0.138637	0.00891506	0.000994252	-0.000517988	0	2.02933e-11	0.000753172	0.378167	5.01334e-11	0	4.86281e-10	0.00556579	0.690741	2.26381e-09
AT1G20890	-0.00253849	0.0471122	0.866068	0.0317729	-0.00277916	-0.001766	-1.14071e-05	0	0.13884	0.311578	0.131553	0.889137	0	0.338842	0.529972	0.419513	0.949488
AT1G20920	0.000303102	-0.0109356	0.977891	0.00796173	-0.000140774	-0.000269214	3.0995e-05	0	0.0185059	0.744799	0.144327	0.0161586	0	0.0772743	0.873045	0.439635	0.0706857
AT1G20980	0.00129567	0.00109051	0.999621	-0.000660696	1.28529e-05	5.13869e-05	-1.0374e-06	0	0.325591	0.881182	0.161069	0.68555	0	0.579703	0.949675	0.465842	0.83409
AT1G21000	0.00127972	-0.0407321	0.882112	0.0308153	0.00559694	-0.00206517	-0.000112216	0	0.138297	0.0353688	0.068642	0.156818	0	0.337977	0.116847	0.289437	0.346572
AT1G21060	0.00371212	-0.18359	0.704206	0.101203	0.0121887	-0.00353544	-9.83154e-05	0	1.45127e-10	1.59505e-09	4.04433e-05	0.10234	0	3.15766e-09	4.71485e-08	0.0009589	0.263051
AT1G21080	0.00140525	0.00192025	0.999258	0.000462073	-0.000136161	1.80625e-05	2.86599e-06	0	0.630193	0.26748	0.73011	0.433424	0	0.828396	0.481389	0.911598	0.639362
AT1G21090	0.023903	-0.00507236	0.939426	0.0105359	0.00128025	-0.000721744	6.72618e-06	0	0.561642	0.581468	0.46612	0.922568	0	0.782831	0.759401	0.755404	0.968933
AT1G21110	0.00366405	-0.00238394	0.963719	-0.00323438	0.000976689	0.000165451	-4.2241e-05	0	0.726458	0.408972	0.742886	0.230711	0	0.881089	0.620886	0.916975	0.439697
AT1G21130	-0.00212063	0.00133285	0.962881	-0.00255871	0.000597556	-0.000125729	-2.78113e-05	0	0.481781	0.199134	0.526346	0.0448909	0	0.726269	0.396887	0.796924	0.149954
AT1G21200	0	0	1.00001	-0.000736229	5.25878e-05	7.88817e-05	-4.10842e-06	0	0.4863	0.697509	0.171525	0.308136	0	0.727392	0.841096	0.473525	0.520864
AT1G21270	-0.0178522	-0.0375561	0.89796	-0.0121323	0.00606114	0.000193647	-0.00014251	0	0.494535	0.0076434	0.841589	0.0353	0	0.733194	0.036379	0.959345	0.12518
AT1G21350	0.0166303	0.0430364	0.959729	0.00854198	0.00232181	-0.000348247	-0.000182434	0	0.336431	0.0411364	0.472547	7.23056e-08	0	0.590924	0.130527	0.758269	1.84585e-06
AT1G21360	-0.02094	-0.0588353	0.637447	0.0723421	0.0111554	-0.00421415	-0.000295191	5.23924e-166	0.00238378	0.000250997	0.00118003	0.00114767	7.40016e-166	0.0143282	0.00222872	0.0162137	0.00863732
AT1G21370	-0.0499257	-0.00710039	0.944627	-0.0377783	-0.0018207	-2.32358e-05	8.14741e-05	0	0.00441144	0.283501	0.974393	0.10724	0	0.0236947	0.49942	1	0.272221
AT1G21400	-0.00854171	-0.0123841	0.935786	0.00369222	-0.00202692	-0.000435353	0.000103855	0	0.412783	0.000441105	0.0767015	1.51155e-09	0	0.664023	0.00357097	0.309781	5.36869e-08
AT1G21440	-0.145797	-0.00778221	0.994511	-0.113673	-0.00394395	8.557e-05	0.00014215	0	8.37766e-09	0.11824	0.936643	0.0587947	0	1.45895e-07	0.280345	0.989218	0.181121
AT1G21460	0.00869387	0.0127829	0.967206	0.0266748	-0.00124895	-0.00149131	4.40917e-05	0	0.150881	0.599116	0.141009	0.533392	0	0.358209	0.771668	0.434985	0.719571
AT1G21480	0.00158467	-0.0146119	0.937895	-0.0306364	-0.00122767	0.00116981	9.37257e-05	0	0.0626119	0.559776	0.192505	0.135112	0	0.197622	0.742887	0.500754	0.314538
AT1G21560	-0.0138254	0.00635778	0.941338	0.00524582	-8.55262e-05	0.000301114	-3.36592e-05	0	0.77993	0.971597	0.768767	0.638147	0	0.909008	0.995867	0.927596	0.799217
AT1G21580	0.000997031	0.000575239	0.999774	0.000473128	-3.97929e-05	-5.153e-06	1.40456e-06	0	0.400052	0.580124	0.86658	0.51225	0	0.653137	0.758475	0.965586	0.7038
AT1G21590	-0.0299907	-0.0128501	0.942615	-0.0219147	-0.000945042	4.58022e-05	6.55879e-05	0	0.0562104	0.519849	0.941686	0.133857	0	0.182349	0.712098	0.991018	0.312817
AT1G21600	0.00152401	-0.00659274	0.987419	0.00438867	0.000679749	-0.000157252	-1.29637e-05	0	0.0126552	0.00254078	0.101503	0.0533586	0	0.0572031	0.0151022	0.36448	0.168772
AT1G21610	-0.247934	-0.156059	0.279611	-0.106716	0.0116929	-0.00642712	-0.000109916	1.51744e-19	0.000767088	0.00396057	0.000203859	0.36334	1.69661e-19	0.00531871	0.0214784	0.00377707	0.57492
AT1G21630	-0.00658225	-0.0158652	0.97554	-0.0175219	0.00118695	0.000507142	-1.21558e-05	0	0.000800154	0.0758704	0.0752792	0.541765	0	0.00551818	0.204736	0.30652	0.725961
AT1G21640	-0.00518805	-0.00341524	0.992856	-0.000660223	-4.20723e-05	5.18898e-06	3.57422e-06	0	0.776517	0.887567	0.96738	0.686862	0	0.907556	0.951978	1	0.834529
AT1G21690	-0.0155855	0.00857699	0.994868	-0.0103456	-0.00194081	-7.65526e-05	5.8559e-05	0	0.204267	0.0626854	0.86329	0.0594359	0	0.43517	0.177919	0.965106	0.182123
AT1G21700	0.0109341	-0.00958102	0.849077	-0.00646555	0.00452444	-0.000141662	-0.000149694	1.25488e-213	0.816891	0.205357	0.925908	0.159644	1.86017e-213	0.930484	0.404432	0.987529	0.350236
AT1G21710	-0.00833347	-0.0231594	0.95272	-0.031198	0.00278678	0.00100125	-5.36195e-05	0	0.00131778	0.0249232	0.0588096	0.147572	0	0.00850078	0.0897275	0.264092	0.332435
AT1G21730	-0.0302303	-0.222529	0.643174	0.0700298	0.0149903	-0.00353392	-0.000104815	1.56078e-167	0.00341184	9.64636e-07	0.00676123	0.250316	2.20835e-167	0.0191781	1.69301e-05	0.0621231	0.463494
AT1G21760	-0.00248938	-0.00229071	0.993962	0.00371995	-9.6587e-05	-0.000209239	9.53652e-06	0	0.205716	0.797326	0.19199	0.394772	0	0.437226	0.902598	0.500501	0.606513
AT1G21790	-0.00224457	-0.0501623	0.919559	0.00150244	0.00727993	-0.000130239	-0.000168338	0	0.829399	3.33998e-16	0.732066	2.40426e-10	0	0.936893	3.00131e-14	0.912646	9.51747e-09
AT1G21840	0.0367717	0.0791845	0.930995	-0.0212671	0.0143578	0.00229049	-0.000811914	3.60799e-260	0.442943	5.1545e-05	0.129857	1.54699e-14	5.55826e-260	0.692946	0.000560895	0.417046	1.2302e-12
AT1G21880	0.00317684	0.0026852	0.997745	-0.00458741	4.28515e-05	0.00030227	-3.68524e-06	0	0.168444	0.919906	0.0962292	0.771643	0	0.384367	0.970618	0.353957	0.885115
AT1G21900	-0.00167152	0	1.00048	-7.4596e-05	-0.000111058	-1.87131e-05	3.60746e-06	0	0.933375	0.330652	0.700669	0.288903	0	0.982926	0.546576	0.895493	0.503521
AT1G21920	-0.00938743	-0.0386755	0.85832	0.0420985	0.00252764	-0.0015212	-2.88383e-05	0	1.43042e-05	0.041721	0.00405256	0.435552	0	0.000154864	0.131731	0.0417624	0.641198
AT1G21980	-0.0150227	-0.0208993	0.961741	-0.012078	0.00208123	0.000254472	-4.09867e-05	0	0.087282	0.0212804	0.509014	0.127972	0	0.248989	0.0798771	0.782522	0.304865
AT1G22070	0.049378	-0.0297325	0.00585478	-0.0380321	0.00312166	0.00460453	-8.22503e-05	0.86243	0.272552	0.481495	0.0148935	0.533642	0.87361	0.522191	0.682878	0.109646	0.719679
AT1G22180	-0.0215741	0.00390164	0.926369	-0.0218259	0.0016676	0.000532948	-8.05133e-05	0	0.152945	0.393381	0.522366	0.166662	0	0.361455	0.606437	0.793841	0.360178
AT1G22280	0.00338735	-0.0199114	0.965979	0.00942097	0.00217756	-0.000323357	-4.20354e-05	0	1.13324e-05	2.17218e-15	0.00574461	2.77159e-07	0	0.000125256	1.6266e-13	0.0550918	5.97255e-06
AT1G22300	0.00227715	-0.00109082	0.988092	0.00542153	0.000406176	-0.000139008	-1.4214e-05	0	5.06166e-09	0.000619922	0.0060117	5.82056e-05	0	9.04256e-08	0.00474095	0.0570445	0.000694602
AT1G22310	0.0216639	0.191544	0.99275	-0.0635698	-0.0153869	0.00548294	0.000110626	2.19285e-84	0.224392	0.0215344	0.0547555	0.579156	2.79622e-84	0.457957	0.0806044	0.253756	0.75556
AT1G22330	-0.0663477	-0.0699189	0.724199	-0.0397475	0.0119413	-0.0016167	-0.000292909	1.34461e-200	0.105948	0.000146905	0.228068	0.00177666	1.96594e-200	0.285301	0.00140585	0.544087	0.0122903
AT1G22370	0.0745353	-0.217914	0.353466	0.062928	0.0294386	-0.000294257	-0.000595681	7.10554e-16	0.161448	3.05789e-07	0.904469	0.000507132	7.86335e-16	0.374007	5.98654e-06	0.981363	0.00432361
AT1G22410	-0.00026642	-0.000259082	0.999579	0.000137584	4.19027e-05	1.22297e-05	-2.26699e-06	0	0.848154	0.648534	0.755055	0.40789	0	0.94663	0.809984	0.920582	0.618511
AT1G22430	-0.0434122	0.184868	0.785112	-0.120987	0.00740689	0.00309706	-0.00074169	0	1.10122e-09	0.00354547	0.0042437	1.12707e-22	0	2.13727e-08	0.0196011	0.0434326	2.4114e-20
AT1G22490	-0.0326302	-0.0893327	0.744486	-0.0414552	0.0133695	-0.000838684	-0.000282572	4.47845e-138	0.170818	0.000789729	0.627079	0.0177198	6.11044e-138	0.388403	0.00579307	0.857227	0.0752505
AT1G22510	-0.00147473	0.000120842	0.00469484	-0.00133967	-0.000571324	0.000134005	1.87897e-05	0.0480836	0.582463	0.0668602	0.313421	0.0430931	0.0498707	0.796907	0.186586	0.636188	0.145632
AT1G22520	0	0						1	1	1	1	1	1	1	1	1	1
AT1G22530	0.00117925	-0.00244067	0.983019	0.00441987	0.000470662	-0.000171563	-1.27161e-05	0	0.00769404	0.0265345	0.0579163	0.0442771	0	0.0376983	0.0940588	0.261525	0.148239
AT1G22550	-0.0084821	0.0204259	0.91968	-0.0679146	2.31677e-05	0.00169795	-2.0698e-05	0	9.82243e-09	0.987802	0.00859719	0.646668	0	1.68443e-07	1	0.0742117	0.805512
AT1G22570	0.0032308	-0.00256509	0.905866	0.00198344	0.00146321	-0.00033703	-4.61808e-05	0	0.789006	0.12283	0.404559	0.102168	0	0.914722	0.286692	0.70934	0.262978
AT1G22590	0.0368757	0.03476	0.938827	0.0281308	-0.00366221	-0.000972461	0.000110585	0	0.147564	0.140593	0.358793	0.135333	0	0.352287	0.314741	0.678904	0.314807
AT1G22620	-0.0215369	0.0249504	0.450574	-0.00958104	0.00475637	-0.00233656	-0.00019931	1.07972e-167	0.567258	0.0264305	0.0105452	0.00179692	1.52817e-167	0.786511	0.0938115	0.0862232	0.0123827
AT1G22630	-0.124021	0.0620289	0.61136	-0.0956328	0.00954096	-0.00209715	-0.00052937	3.95905e-262	1.33669e-07	3.91614e-05	0.0340165	1.89091e-14	6.10747e-262	1.95308e-06	0.000438783	0.189388	1.47754e-12
AT1G22640	-0.194849	-0.0334919	0.866058	-0.221235	-0.00271468	0.00208684	0.000167689	0	6.76679e-55	0.134496	0.00697348	0.00191759	0	1.2668e-52	0.305506	0.0635534	0.0131138
AT1G22650	-0.00772519	0.025171	0.974353	-0.01446	-0.00499193	0.00102303	9.90347e-05	0	0.303533	0.00549916	0.182103	0.0645284	0	0.556189	0.0279183	0.486438	0.192706
AT1G22660	-0.0162195	0.0545509	0.863658	-0.00899527	0.00264031	0.000109484	-0.00022542	3.03446e-176	0.773837	0.509731	0.948882	0.0588883	4.33439e-176	0.905902	0.703926	0.993847	0.181223
AT1G22700	-0.0489072	0.0113808	0.921728	-0.0640476	-0.00465853	0.00108594	0.000150437	0	7.58556e-15	9.8818e-06	0.0156827	1.66654e-06	0	2.60167e-13	0.000131552	0.113924	2.94793e-05
AT1G22730	0.00702161	-0.012902	0.961146	0.0143027	0.00237151	-0.000121734	-7.29198e-05	0	0.0443248	0.00915526	0.753715	0.00715555	0	0.153904	0.0417398	0.920471	0.0373402
AT1G22740	0.0020713	-0.022197	0.960755	0.0163057	0.00187147	-0.000651236	-2.3954e-05	0	1.88087e-06	1.90861e-05	0.000484762	0.0662718	0	2.33447e-05	0.000233027	0.00776484	0.196023
AT1G22750	-0.00370277	-0.00814063	0.977506	-0.00529101	0.000603104	-0.00012081	-4.86403e-06	0	0.194591	0.247831	0.587204	0.75443	0	0.422163	0.458327	0.831487	0.876631
AT1G22840	0.000414719	-0.0015768	0.994215	0.00152615	0.000162321	-3.10728e-05	-3.37584e-06	0	0.000969867	0.00609537	0.218225	0.0555783	0	0.00654296	0.0303957	0.534615	0.174198
AT1G22850	0.0147416	0.0195732	0.971264	0.00864254	-0.000127785	-0.00046678	-2.38744e-05	0	0.453927	0.931033	0.458448	0.587353	0	0.70146	0.975705	0.751179	0.761499
AT1G22860	0.0169431	-0.221573	0.452357	-0.0199208	0.00938963	0.0030815	8.81372e-05	6.64696e-25	0.658214	0.103151	0.209714	0.60765	7.54256e-25	0.845683	0.254647	0.52458	0.777498
AT1G22870	-0.212566	-0.37733	0.20367	-0.215118	0.0132623	0.0053155	4.26024e-05	0.10976	0.0996561	0.42754	0.455807	0.931834	0.113394	0.274192	0.637761	0.749269	0.973505
AT1G22910	-0.0357886	0.00767411	0.387081	-0.0421095	-0.00232561	0.00163531	7.9247e-05	2.49797e-32	0.209384	0.587922	0.371558	0.535464	2.89337e-32	0.441782	0.764443	0.688416	0.720096
AT1G22930	0.00140824	-0.00666397	0.987362	0.00369837	0.000519813	-0.000121506	-6.8865e-06	0	0.0341753	0.0199781	0.202128	0.300882	0	0.126326	0.0759234	0.516321	0.51588
AT1G22940	0.0188889	0.0305661	0.977076	0.0047213	-0.00159976	0.000519474	-8.34858e-07	0	0.642988	0.219599	0.349862	0.982846	0	0.835559	0.422913	0.671473	0.999331
AT1G22970	0.0419384	0.0310349	0.926018	-0.00595194	-0.00208453	0.00188331	-6.78835e-06	0	0.684422	0.26589	0.0184055	0.903216	0	0.857787	0.480026	0.125842	0.956487
AT1G23000	0.00635632	0.182457	0.479473	-0.191548	-0.0155998	0.0084696	0.000317826	0.000237848	0.137255	0.346708	0.224106	0.513924	0.000251388	0.336343	0.56308	0.540333	0.704948
AT1G23020	0.033138	0.0848449	0.461444	-0.0492231	-0.00398864	0.00478998	-5.05486e-05	4.01957e-75	0.0565329	0.227148	0.000670319	0.607467	5.05032e-75	0.183263	0.433089	0.0102266	0.777498
AT1G23030	-0.104556	-0.0154032	0.916687	-0.00381492	0.000453185	-0.00441884	1.03393e-06	0	0.786802	0.801716	9.32526e-09	0.984659	0	0.913108	0.903762	5.90118e-07	1
AT1G23080	-0.00807194	-0.00454618	0.967267	0.00144753	-0.000632065	-0.000269168	2.83056e-05	0	0.66937	0.145021	0.145537	0.0284965	0	0.851103	0.321111	0.441079	0.107045
AT1G23090	-0.0125043	-0.0159274	0.967257	0.00341112	-0.000816716	-0.000269429	4.07832e-05	0	0.651008	0.39725	0.512505	0.155973	0	0.841925	0.610517	0.78523	0.345235
AT1G23140	-0.00168032	0.0108823	0.991647	-0.00146863	2.08575e-05	-0.000281578	-2.92599e-05	0	0.902315	0.98913	0.666213	0.521223	0	0.972557	1	0.877027	0.711667
AT1G23170	-0.0454697	0.271719	0.389157	-0.251244	-0.00780369	0.00675196	-7.93205e-05	0.00897938	0.100116	0.689758	0.417942	0.891681	0.00938896	0.275035	0.83759	0.719703	0.951075
AT1G23180	0.00938494	0.0179784	0.992297	-0.00176369	-0.000551591	-5.73166e-05	7.3653e-06	0	0.903328	0.766544	0.942321	0.894151	0	0.972715	0.88559	0.991109	0.952221
AT1G23220	-0.00722736	-0.0046527	0.993961	0.00141892	-0.000533485	-0.000168518	2.64759e-05	0	0.71541	0.283968	0.427348	0.0743231	0	0.875244	0.499851	0.726782	0.212408
AT1G23230	-0.407043	0.00367652	0.99812	-0.311793	-0.00116845	-0.0026926	2.05316e-06	4.49838e-214	1.91713e-21	0.781719	0.138363	0.986977	6.67258e-214	1.02544e-19	0.894047	0.431442	1
AT1G23260	0.00244037	0.00512947	1.00042	-0.00331584	-0.000168482	0.000339683	-7.98428e-06	0	0.0401214	0.414994	0.000116116	0.194817	0	0.142841	0.626009	0.00236602	0.396873
AT1G23280	0	0						1	1	1	1	1	1	1	1	1	1
AT1G23310	0.00045667	-0.000436614	0.994275	0.000726316	0.00017138	-4.79745e-06	-6.60763e-06	0	0.337904	0.0771646	0.90763	0.0221969	0	0.592124	0.207481	0.981818	0.0884528
AT1G23330	0.0159302	-0.00779284	0.933391	0.004412	0.000194525	0.000470792	-1.33681e-06	0	0.791523	0.927419	0.605136	0.983238	0	0.916217	0.974371	0.841887	0.999413
AT1G23360	-0.274239	0.0261762	0.343665	-0.306649	-0.000415125	0.00443519	-0.000164864	2.20338e-44	5.37605e-34	0.897662	0.00127032	0.0864743	2.62559e-44	4.73619e-32	0.95729	0.0171398	0.234761
AT1G23400	-0.0647303	0.0288331	0.944215	-0.0658515	-0.00286899	0.000522393	3.43331e-05	0	3.31435e-09	0.0439791	0.389709	0.41851	0	6.09054e-08	0.136962	0.697873	0.627102
AT1G23440	0.00558762	0.0132759	0.927596	0.0139715	-0.00107463	-0.000256324	8.72706e-06	0	0.022274	0.169412	0.442103	0.70802	0	0.0891555	0.357225	0.738977	0.849053
AT1G23460	0.038135	0.0432612	0.976237	0.0278505	-0.00292759	-0.000178464	4.61684e-05	0	0.161748	0.250305	0.869455	0.542884	0	0.374316	0.461602	0.966332	0.726378
AT1G23480	0.15789	0.0688573	0.710428	0.207908	-0.00327438	-0.00145303	-0.000101059	1.76127e-112	1.28218e-10	0.428698	0.410146	0.412336	2.32405e-112	2.81017e-09	0.639054	0.713982	0.621755
AT1G23550	-0.077277	-0.029806	0.927138	-0.0749717	0.00603998	0.000714071	-0.000158631	0	0.000423017	0.0279641	0.539108	0.0529522	0	0.00317563	0.0978478	0.806012	0.167841
AT1G23740	-0.000874155	-0.00070362	0.996096	-0.00224914	-7.32099e-06	0.00010012	-1.47083e-06	0	0.24356	0.976332	0.341335	0.841445	0	0.484747	0.998188	0.662519	0.923725
AT1G23790	-0.140462	0.0118433	0.953652	-0.0487296	-0.00394852	-0.00132245	8.86213e-05	8.78366e-58	0.427601	0.637208	0.746732	0.732443	1.07067e-57	0.678551	0.801169	0.917337	0.863065
AT1G23800	0.0167551	-0.0238734	0.892422	0.0195413	0.0049116	-0.000218181	-0.00013701	0	0.0989081	0.00118778	0.735571	0.00240524	0	0.273053	0.00814142	0.913466	0.0157647
AT1G23820	0.00320207	-0.00565459	0.693007	0.0235495	0.00040769	-0.000935474	-8.90051e-06	0	0.0748122	0.809498	0.194535	0.859794	0	0.224105	0.909609	0.503193	0.933781
AT1G23890	-0.102463	-0.112832	0.187059	-0.0330387	-0.00155753	-0.00195398	0.000323907	5.34126e-05	0.486699	0.797722	0.450813	0.0736403	5.66531e-05	0.727606	0.902598	0.745681	0.211348
AT1G23900	0.0202923	-0.0304747	0.870569	0.0274392	0.000880631	0.000101432	2.53348e-05	0	0.0191871	0.556899	0.873916	0.570572	0	0.0794542	0.741047	0.968671	0.748272
AT1G23950	-0.0694729	-0.00538755	0.964493	-0.102758	-0.00252945	0.00162151	0.000103446	0	7.55719e-18	0.0977642	0.0127989	0.0230452	0	3.21843e-16	0.245197	0.0989682	0.091026
AT1G23970	0.0104403	0.0217729	0.981166	0.00994693	-0.000418016	-9.81186e-05	-3.82074e-05	0	0.397037	0.780868	0.878291	0.393453	0	0.650578	0.893871	0.97116	0.605475
AT1G23980	0.017026	0.0124279	0.859698	-0.0303619	0.00104994	0.00063368	-3.67408e-05	4.25722e-113	0.436545	0.833438	0.765967	0.804926	5.62331e-113	0.687097	0.923484	0.925928	0.904246
AT1G24030	-0.151858	-0.19082	0.722034	0.0516636	0.0129803	-0.00580191	-0.000275986	1.81004e-11	0.637519	0.359627	0.333119	0.513724	1.96627e-11	0.832183	0.574432	0.6553	0.704948
AT1G24050	-0.00296103	-0.0246067	0.953324	0.00470761	0.00255342	-0.000187058	-5.25723e-05	0	0.129836	1.34765e-10	0.269907	9.10404e-06	0	0.324035	4.90284e-09	0.592134	0.000137494
AT1G24090	-0.00202028	0.00831654	0.977658	-0.0026108	0.00441887	-5.5594e-05	-0.000211014	0	0.925622	0.175079	0.97874	0.0779219	0	0.980622	0.365222	1	0.219363
AT1G24148	-0.00566829	-0.108888	0.772488	0.0206663	0.011876	-0.00183279	-0.000223707	3.13973e-306	0.329335	1.17978e-05	0.112802	0.00560811	4.98122e-306	0.583867	0.00015254	0.386085	0.030896
AT1G24160	-0.00647625	-0.0025926	0.944939	0.00127106	-0.000660786	-0.000141233	3.45541e-05	0	0.838198	0.406693	0.677481	0.145338	0	0.942184	0.619099	0.883321	0.328969
AT1G24240	-0.0657195	-0.0400524	0.858391	-0.0827015	0.000293557	0.000850898	6.21962e-05	0	6.32694e-05	0.91163	0.450586	0.430008	0	0.000593464	0.965913	0.745681	0.637317
AT1G24265	-0.132146	-0.213496	0.61886	-0.133568	-0.00900647	0.0032769	0.00078765	3.60647e-42	0.00419943	0.131352	0.197949	9.49004e-06	4.27542e-42	0.0227337	0.300587	0.50953	0.000142129
AT1G24267	-0.0653737	0.00518367	0.983371	-0.0135307	0.0028418	-0.00303966	-9.84667e-05	0	0.335301	0.11373	7.26155e-05	0.0658717	0	0.589927	0.272383	0.00157996	0.195528
AT1G24300	0.0131192	-0.0250095	0.929146	0.0054335	0.00252815	-0.000142251	-2.07276e-05	0	0.520913	0.0195667	0.758034	0.520621	0	0.751594	0.0746609	0.922157	0.71142
AT1G24340	-0.000738147	-0.0138511	0.963899	0.015272	0.000996712	-0.000752661	-9.29272e-06	0	0.0144617	0.21221	0.0271536	0.696271	0	0.0634535	0.412843	0.162668	0.840163
AT1G24350	0.0206779	0.0110653	0.478023	-0.0127115	-0.00479242	0.00080779	0.000163548	5.30625e-73	0.639475	0.167474	0.585303	0.113878	6.64279e-73	0.833284	0.354433	0.830341	0.28323
AT1G24360	0.00483362	-0.0180325	0.968261	0.0172136	0.00121517	-0.000515119	-8.66298e-06	0	1.19883e-17	2.36683e-06	2.70998e-06	0.258835	0	5.01055e-16	3.86698e-05	9.62525e-05	0.471106
AT1G24440	-0.0128768	-0.124305	0.713386	0.0137735	0.00951304	-0.0010766	-9.07056e-05	0	0.47679	0.000122629	0.308019	0.219038	0	0.722301	0.00119258	0.630347	0.425572
AT1G24450	0.000396752	-0.0333787	0.925055	0.016973	0.00231048	-0.000634068	-1.69207e-05	0	0.0446492	0.032646	0.169135	0.599511	0	0.154731	0.109748	0.473525	0.771919
AT1G24460	0.00287867	0.000221345	0.0018727	0.00135297	0.00033586	-9.42729e-05	-1.01039e-05	0.375416	0.532487	0.225845	0.4253	0.221394	0.384531	0.761447	0.43143	0.725865	0.427932
AT1G24510	-0.0116274	-0.000340471	0.994297	-0.00881025	0.000165034	-8.1175e-05	-4.25153e-06	0	0.000451045	0.607498	0.553509	0.656969	0	0.00337196	0.777915	0.811922	0.813381
AT1G24706	-0.0157365	0.0353748	0.830549	0.0444968	-0.00611926	-0.00137422	0.000155305	4.19445e-141	0.18661	0.155736	0.454678	0.226597	5.75089e-141	0.410196	0.337459	0.748715	0.434251
AT1G24735	0.0174305	-0.0086096	0.975648	0.0197385	0.00109088	-0.000594656	-1.43088e-05	0	0.292745	0.652912	0.610351	0.854821	0	0.546904	0.813087	0.845207	0.930743
AT1G24764	-0.0160665	-0.103282	0.767461	-0.021024	0.0114624	-0.000350494	-0.000204468	0	0.276947	3.60459e-06	0.739711	0.00554261	0	0.527806	5.52745e-05	0.914815	0.0307065
AT1G24793	-0.0123033	-0.00585689	0.0262403	-0.0185047	0.00139636	-0.000313869	-1.17035e-05	0.144832	0.316222	0.554435	0.755336	0.867935	0.149319	0.568973	0.738754	0.920582	0.938765
AT1G24880	0.00117882	-0.000416917	0.000207373	0.00038658	-2.44513e-05	2.77195e-05	1.79687e-06	0.746495	0.556928	0.771512	0.440073	0.473849	0.757967	0.779404	0.887343	0.737366	0.671504
AT1G25098	-0.00169636	0.00556926	0.0162709	-0.00391481	-0.000538761	0.000119271	9.21483e-06	2.08126e-45	0.000910585	0.00036009	0.0639833	0.0405605	2.48534e-45	0.00620358	0.00299331	0.278098	0.138993
AT1G25145	-0.0373918	0.0368519	0.956452	-0.0656134	-0.00955634	0.00166435	0.000327238	0	0.000110848	1.0803e-05	0.0722804	4.25339e-07	0	0.000973682	0.000141879	0.299452	8.68658e-06
AT1G25220	0.00409875	0.0106732	0.991857	-0.00364132	0.000191793	0.000303649	-2.10458e-05	0	0.565364	0.812911	0.379533	0.383414	0	0.784956	0.911507	0.691276	0.595465
AT1G25230	0.00643584	-0.0235225	0.884929	0.0224376	0.00272727	-0.000695259	-6.00354e-05	0	8.26326e-05	0.000184059	0.025354	0.00572608	0	0.000747771	0.0017104	0.155892	0.0314707
AT1G25260	0.0200158	0.0216869	0.801255	-0.010385	0.000912645	0.00133796	-6.00248e-05	3.85364e-210	0.695912	0.788342	0.355997	0.553448	5.69272e-210	0.864694	0.89647	0.676175	0.734791
AT1G25280	-0.0114889	-0.0202576	0.952477	-0.0291911	0.00256279	0.000807692	-4.80407e-05	0	2.68556e-05	0.00396307	0.0332158	0.0698956	0	0.000275799	0.021479	0.186316	0.203589
AT1G25290	-0.0452241	0.191894	0.864106	-0.103364	-0.00386111	0.00275466	-0.000294219	2.54299e-288	2.32511e-05	0.216704	0.0387418	0.00158148	3.9929e-288	0.000241263	0.418595	0.204389	0.0112341
AT1G25375	-0.00595899	-0.0152809	0.965774	0.0149905	0.00115434	-0.00129972	-1.42989e-05	0	0.31591	0.546098	0.110959	0.801856	0	0.568663	0.731767	0.382261	0.902829
AT1G25380	-0.00398794	0.030797	0.482431	0.0227542	0.00279615	-0.00202235	-0.000156831	1.70198e-11	0.757024	0.766342	0.614228	0.575898	1.84934e-11	0.897613	0.885476	0.848273	0.75293
AT1G25390	-0.0121073	-0.0240931	0.909293	0.0262683	0.00274342	-0.00167964	-5.27334e-05	0	0.0609071	0.126047	0.0280446	0.323665	0	0.193743	0.291974	0.165795	0.536814
AT1G25420	-0.0974543	-0.0394576	0.728478	0.1285	0.00787458	-0.0102721	-0.000214415	3.55504e-184	6.47985e-07	0.0171473	3.05916e-13	0.0293919	5.11702e-184	8.55036e-06	0.0674337	4.04259e-11	0.108974
AT1G25480	-8.84432e-05	0.0509651	0.948197	0.0122596	0.0100399	-0.00098293	-0.000556568	8.89259e-308	0.636482	0.00248447	0.487309	1.8179e-08	1.41306e-307	0.831723	0.0148539	0.768374	5.28663e-07
AT1G25500	-0.0941233	0.102181	0.819598	0.0999529	-0.00321162	-0.00579796	-0.000191608	1.60796e-81	0.0230076	0.568053	0.0156415	0.252968	2.04199e-81	0.0913189	0.749894	0.113717	0.465432
AT1G25520	0.000217426	-0.00222728	0.996733	0.00133104	0.000270512	-7.65703e-05	-5.48955e-06	0	0.389047	0.171237	0.363732	0.3514	0	0.641148	0.359237	0.681505	0.563368
AT1G25530	-0.0139738	-0.0147567	0.976053	0.0144414	-0.000340309	-0.00103836	4.05613e-05	0	0.146575	0.789171	0.0557024	0.284796	0	0.350538	0.896749	0.256556	0.499839
AT1G25540	-0.0168042	-0.219716	0.623471	-0.0100507	0.0210349	-0.000384449	-0.000332148	1.40504e-141	0.690583	7.43734e-11	0.780166	0.000558888	1.92699e-141	0.861816	2.86832e-09	0.932877	0.00468049
AT1G25550	0.00688414	0.0103286	0.938544	0.0143705	-2.88381e-05	-0.00034542	-2.19218e-05	0	0.00245418	0.962108	0.182024	0.225485	0	0.0146826	0.9909	0.486372	0.433135
AT1G25570	0.05305	0.040846	0.804472	0.0975484	0.00512479	-0.00282027	-0.00026151	8.66586e-259	4.8712e-05	0.0953471	0.0313549	0.00428523	1.33364e-258	0.000472197	0.240724	0.179234	0.0252505
AT1G26090	0.0791582	0.0182651	0.645137	0.0671125	0.00621096	-0.000519422	-0.00027518	6.26601e-45	0.153816	0.302251	0.839658	0.125032	7.47066e-45	0.362841	0.51905	0.958193	0.301401
AT1G26100	-0.089903	0.044997	0.852455	-0.00572837	-0.00137731	-0.00339912	-9.5739e-05	1.23214e-70	0.907344	0.826863	0.205528	0.609857	1.5365e-70	0.974117	0.920215	0.519953	0.778987
AT1G26120	-0.0360764	0.00300873	0.840419	-0.0667265	-0.00224743	0.00183064	5.82261e-05	5.69482e-169	0.0320058	0.572409	0.280868	0.623534	8.07028e-169	0.120321	0.752419	0.603432	0.790055
AT1G26130	0.000249276	-0.0144557	0.973603	0.00463315	-0.000524008	-0.000878751	4.8365e-05	0	0.848979	0.866322	0.507954	0.602059	0	0.94663	0.943354	0.782065	0.774088
AT1G26150	-0.0918211	0.0716598	0.549943	-0.0740302	-0.0111094	0.00105415	0.000251306	1.40827e-17	0.262775	0.189014	0.770059	0.318658	1.56541e-17	0.509779	0.383144	0.927704	0.531847
AT1G26160	-0.22095	-0.0400636	0.826194	-0.15353	0.0120343	-0.0024554	-0.000392545	1.30247e-199	4.75791e-08	0.000822339	0.109451	0.000250138	1.90247e-199	7.56719e-07	0.00600721	0.378425	0.00240916
AT1G26170	-0.015387	-0.0440954	0.876319	-0.0227489	0.000216544	0.000559366	7.40088e-05	0	0.0431915	0.880428	0.362144	0.0844426	0	0.151019	0.949193	0.680089	0.231201
AT1G26180	-0.214899	-0.0132594	0.825587	-0.212431	-0.0024669	0.000417054	0.000130916	1.80847e-287	1.01015e-19	0.409447	0.743635	0.141789	2.83709e-287	4.8283e-18	0.621385	0.917337	0.323955
AT1G26190	0.0297713	0.0428801	0.889467	-0.0341065	0.00294604	0.00187561	-0.000172841	1.6758e-183	0.280252	0.466015	0.276405	0.151178	2.41017e-183	0.531664	0.671586	0.598645	0.338015
AT1G26230	0.0797151	0.0738278	0.716834	-0.0386798	-0.00324772	0.00276045	2.51103e-05	3.13958e-83	0.309353	0.504674	0.183563	0.862558	3.99664e-83	0.561812	0.699846	0.48845	0.935427
AT1G26300	-0.00709736	-0.00129356	0.985343	0.000578364	-0.000595334	-6.08532e-05	1.93201e-05	0	0.902655	0.325109	0.81352	0.283829	0	0.972573	0.54342	0.947665	0.498824
AT1G26340	0.00251509	-0.00495965	0.982121	0.00035901	0.000880078	0.0001442	-2.41282e-05	0	0.905408	0.0227937	0.381622	0.0361689	0	0.97371	0.0840256	0.692359	0.127707
AT1G26370	-0.129625	0.00828356	0.967835	-0.0121831	0.00395021	-0.00650523	-0.000126041	0	0.630797	0.223233	2.55172e-06	0.192133	0	0.828826	0.428077	9.20872e-05	0.39328
AT1G26440	-0.0608207	-0.264095	0.369352	-0.0589838	0.020288	0.000600038	-0.000260167	3.51931e-18	0.175979	0.000274702	0.800776	0.117402	3.91926e-18	0.395756	0.00240124	0.942446	0.288638
AT1G26450	-0.00568884	-0.0104595	0.952987	0.0196323	0.000954178	-0.000976115	-1.15443e-05	0	0.172131	0.603981	0.213357	0.833189	0	0.390796	0.774596	0.528029	0.919218
AT1G26460	-0.0114642	-0.0497877	0.87184	0.0142038	0.00641221	-0.000972865	-0.000135636	0	0.242407	3.71061e-05	0.142193	0.00340817	0	0.483221	0.000418364	0.436688	0.0210198
AT1G26470	0.0021436	-0.0163389	0.962655	0.000144282	0.00227238	2.53116e-05	-4.64777e-05	0	0.972702	2.52718e-05	0.912379	0.00383318	0	0.99952	0.000298414	0.983404	0.0231952
AT1G26520	0.00226965	0.00134727	0.996037	0.0028339	0.000565521	-0.000226147	-2.02478e-05	0	0.507631	0.301428	0.332481	0.214329	0	0.74329	0.518326	0.65487	0.420332
AT1G26560	0.177492	0.159663	0.970194	-0.0302485	-0.0060949	0.00714398	-1.05798e-05	2.25074e-37	0.698959	0.548443	0.108582	0.972659	2.64139e-37	0.866801	0.734034	0.377453	0.993007
AT1G26580	0.0304024	-0.0733871	0.830331	0.0638863	0.00689277	-0.00156819	-0.000105569	0	4.94135e-22	4.04354e-16	1.41351e-05	2.87953e-05	0	2.73972e-20	3.56228e-14	0.000405807	0.000378297
AT1G26630	0.000100867	-0.000421813	0.998616	0.00051143	2.52713e-05	-1.70029e-05	-3.0027e-08	0	0.00364767	0.261532	0.0764585	0.964288	0	0.0201959	0.474869	0.309067	0.989724
AT1G26640	0.00142677	0.022913	0.985297	0.00604174	0.000303617	-0.000685167	-5.81063e-05	0	0.408648	0.745525	0.085865	0.0371066	0	0.660444	0.873322	0.331402	0.129642
AT1G26660	-0.268007	0.0018114	0.920624	0.0305489	0.0141843	-0.0165083	-0.000466215	3.00899e-219	0.306632	0.000207173	4.21378e-24	4.26369e-05	4.48479e-219	0.559392	0.00189772	2.36656e-21	0.000533227
AT1G26665	0	-0.00179006	0.997733	0.00180858	0.00017114	-8.16827e-05	-3.07324e-06	0	0.0503859	0.147848	0.105259	0.383103	0	0.168393	0.325149	0.369968	0.59529
AT1G26670	0.00351106	-0.0377442	0.939579	0.0263758	0.00207721	-0.000965897	-1.50579e-06	0	1.70688e-13	5.71779e-06	7.52896e-07	0.912114	0	5.11269e-12	8.14264e-05	3.1763e-05	0.961325
AT1G26690	0.0108136	-0.0304184	0.890268	0.0270527	0.00199812	-0.00104991	-7.19893e-07	0	0.00607131	0.113183	0.0509372	0.984718	0	0.0309104	0.271579	0.243469	1
AT1G26750	0.0161276	0.0294333	0.67602	-0.0386929	-0.00363718	0.00267197	6.81085e-05	1.01864e-176	0.11381	0.245312	0.045324	0.465291	1.45594e-176	0.299477	0.455404	0.227405	0.664195
AT1G26770	-0.0117306	-0.0113339	0.970958	0.00654365	-0.00031049	-0.000434143	2.74819e-05	0	0.374659	0.74197	0.280293	0.328043	0	0.629994	0.870978	0.602752	0.538902
AT1G26820	0	0	0.999714	0.000560712	-2.59152e-06	-3.19342e-05	3.88789e-07	0	0.273665	0.968457	0.253127	0.842178	0	0.523224	0.994051	0.574829	0.92424
AT1G26830	-0.0161554	-0.0140439	0.958248	0.000840233	0.00133978	-0.000721439	-2.81412e-05	0	0.925069	0.241139	0.138813	0.408636	0	0.980591	0.450401	0.431772	0.619017
AT1G26850	-0.0115146	-0.00611622	0.990533	-0.00189164	0.000390248	-0.000231219	-7.05971e-06	0	0.592496	0.388121	0.230451	0.600289	0	0.804068	0.60132	0.546971	0.772697
AT1G26880	0.000426558	-0.00250868	0.991839	0.00190723	0.000282107	-8.34516e-05	-3.81871e-06	0	0.0604641	0.0299711	0.132128	0.324103	0	0.193012	0.103109	0.420537	0.537341
AT1G26900	-0.0374472	-0.0119597	0.832667	-0.000562056	0.005404	-0.000720569	-0.000221039	4.16e-91	0.989374	0.31688	0.75429	0.169443	5.35172e-91	1	0.535392	0.920471	0.363393
AT1G26910	0.010936	0.00630462	0.987364	0.00438247	0.000751779	-6.77234e-05	-3.36067e-05	0	0.29111	0.156935	0.764911	0.0337014	0	0.544642	0.338913	0.925847	0.121282
AT1G26940	-0.0766235	-0.015663	0.936343	-0.134007	-0.00218152	0.00432154	3.83456e-05	1.24109e-301	2.23466e-07	0.50994	0.00220407	0.69748	1.96381e-301	3.16231e-06	0.704003	0.0266755	0.841056
AT1G26960	-0.000412046	-0.00914408	0.978099	0.00605614	0.00197488	-9.86245e-05	-6.98285e-05	0	0.55861	0.136012	0.861393	0.0768729	0	0.7803	0.307628	0.964666	0.217774
AT1G27020	0.0158504	-0.0495232	0.894035	0.0430936	0.00641535	-0.00124471	-0.000155333	0	9.61602e-10	1.1106e-12	0.00120399	7.3517e-09	0	1.88256e-08	5.80226e-11	0.0164424	2.30987e-07
AT1G27030	-0.0582914	-0.0500203	0.894399	-0.0766071	0.00744516	0.000480867	-0.00016291	0	0.000133972	0.00371971	0.660357	0.033136	0	0.00115093	0.0203565	0.875236	0.119679
AT1G27070	-0.0322374	-0.0642953	0.702019	0.0748154	0.00138847	-0.00468908	0.000100521	1.60544e-98	0.0286372	0.750906	0.0119299	0.440515	2.08595e-98	0.109972	0.877001	0.0942847	0.644702
AT1G27090	0.000118304	-0.000198541	0.998037	0.000563221	7.98144e-07	-2.2586e-05	3.66796e-07	0	0.459585	0.993464	0.58671	0.899464	0	0.7068	1	0.831487	0.954598
AT1G27100	-0.00180531	-0.00782111	0.939387	-0.00330124	0.00144539	5.15466e-05	-3.80191e-05	0	0.389975	0.00326235	0.805644	0.00940164	0	0.641712	0.0183222	0.943991	0.0462267
AT1G27110	-0.146203	-0.147651	0.390448	0.356096	0.00786797	-0.0250496	7.90071e-05	0.0116504	0.0197087	0.669265	0.00113949	0.879898	0.0121677	0.0810842	0.824317	0.015753	0.944204
AT1G27120	0.0205606	0.0183676	0.888167	-0.00345797	0.00127821	0.00107316	-0.000111419	5.10619e-59	0.950979	0.859023	0.726543	0.603326	6.24021e-59	0.989864	0.938616	0.909418	0.774652
AT1G27150	-0.0124859	-0.0229432	0.954802	-0.00850138	0.00277261	0.000115348	-6.60408e-05	0	0.099405	2.66591e-05	0.681948	0.000785815	0	0.274004	0.00031274	0.886708	0.00623792
AT1G27170	-0.0119277	0.0112066	0.975792	0.0186323	0.00276151	-0.0023524	-9.84447e-05	0	0.45468	0.386445	0.0835879	0.3001	0	0.702104	0.599622	0.326432	0.515277
AT1G27180	-0.0600852	-0.0933286	0.387825	-0.0751067	0.0115446	-0.00121022	-0.000222066	2.99777e-14	0.151466	0.0848423	0.671815	0.265922	3.29396e-14	0.359217	0.221561	0.880404	0.479554
AT1G27210	0.00447226	-0.00128486	0.989586	0.00462663	0.000418508	-0.000102031	-6.87823e-06	0	0.173754	0.336197	0.582414	0.595784	0	0.39299	0.553005	0.828966	0.768992
AT1G27290	0.00152261	0.00376538	0.997228	-0.000242686	0.000624282	5.12253e-05	-3.54515e-05	0	0.779343	1.76894e-08	0.278352	6.87194e-27	0	0.908781	4.31949e-07	0.601556	2.57297e-24
AT1G27320	-0.0363482	-0.047824	0.866256	0.0596229	0.00466571	-0.00430165	-8.84762e-05	3.41853e-150	0.0799057	0.284117	0.0205591	0.49543	4.734e-150	0.234498	0.499879	0.135146	0.689688
AT1G27370	-0.0700052	-0.0946476	0.657993	0.0674469	0.00133419	-0.00497666	7.24143e-05	5.35268e-37	0.204186	0.844364	0.0859201	0.720639	6.27353e-37	0.435099	0.929645	0.331402	0.855591
AT1G27385	0.0455703	0.0357083	0.318877	0.0357659	-0.00187879	-0.0021572	2.77681e-05	3.30448e-12	0.446423	0.754576	0.39991	0.876768	3.60365e-12	0.695968	0.878534	0.705153	0.942421
AT1G27390	-0.0187573	-0.00372444	0.971331	-0.0138331	0.000776386	6.9526e-05	-3.46621e-05	0	0.0171183	0.295617	0.826144	0.117085	0	0.0727304	0.512525	0.952058	0.288095
AT1G27400	-0.00258872	-0.00314097	0.994092	0.00113258	0.0002305	-0.000108347	-2.37128e-06	0	0.36513	0.1497	0.112273	0.618912	0	0.621295	0.328179	0.384777	0.785873
AT1G27430	-0.00385678	-0.0121711	0.959269	0.00688064	-0.000352508	-0.000469985	4.57959e-05	0	0.380844	0.725652	0.27254	0.126004	0	0.635243	0.859798	0.595584	0.302826
AT1G27450	-0.000359638	-0.00220056	0.99109	0.00337065	0.000179269	-0.000123142	-4.6129e-06	0	0.00131451	0.181694	0.0314356	0.248748	0	0.00848575	0.373872	0.179467	0.461637
AT1G27460	-0.0475044	-0.00326715	0.928014	-0.00755512	-0.00160608	-0.000665644	2.55561e-05	0	0.599091	0.382396	0.395873	0.640872	0	0.807897	0.594705	0.702516	0.801402
AT1G27470	-0.0107334	0.000685856	0.994779	0.000186134	0.000312047	-0.000345118	-2.24662e-05	0	0.965831	0.574583	0.145416	0.174997	0	0.996928	0.753642	0.441008	0.371316
AT1G27510	-0.0786547	-0.0445102	0.903671	-0.168054	0.000337301	0.00442017	4.41366e-05	0	3.15628e-23	0.876237	1.69833e-06	0.494001	0	1.84171e-21	0.947961	6.38544e-05	0.688815
AT1G27520	0.0229834	0.0625993	0.155496	0.00490643	-0.00685205	0.0014931	0.000113501	1.69725e-18	0.787225	0.00321638	0.132161	0.101435	1.89154e-18	0.913482	0.0181433	0.420537	0.261623
AT1G27595	-0.109833	0.0780469	0.614044	-0.124532	0.00553634	0.00267348	-0.000498309	5.11635e-86	0.000102001	0.176943	0.126233	4.52743e-05	6.53898e-86	0.000904818	0.367243	0.409837	0.000560379
AT1G27600	-0.000656141	-0.00871644	0.977842	-0.0061638	0.00124728	0.000431784	-3.51483e-05	0	0.0123748	7.61899e-05	0.00131904	0.000182888	0	0.0563039	0.000794249	0.0175339	0.00184035
AT1G27630	-0.178874	0.159742	0.662382	-0.110206	-0.0215215	-0.00119687	0.000428857	1.19366e-132	7.04417e-05	1.30399e-09	0.428787	4.9609e-05	1.61662e-132	0.000651224	3.94533e-08	0.727409	0.000605688
AT1G27660	-0.0013872	-0.0147056	0.941458	0.00497061	0.00798158	-0.0013995	-0.000326809	1.2595e-115	0.905878	0.141766	0.54257	0.0436925	1.6693e-115	0.97371	0.316422	0.808546	0.146774
AT1G27700	-0.015047	-0.030604	0.813545	0.0295021	-0.00971656	0.00236296	0.000262193	1.92475e-47	0.609054	0.187998	0.452741	0.233145	2.30765e-47	0.815035	0.381602	0.74758	0.442557
AT1G27750	-0.00569722	0.0729844	0.929147	0.0259049	0.00607135	-0.00285788	-0.000393401	2.71915e-107	0.54987	0.273357	0.226584	0.0172154	3.57436e-107	0.77385	0.487765	0.542957	0.0737005
AT1G27752	0.00511498	0.119334	0.951725	-0.0217128	-0.000601557	0.000532499	-0.000245341	1.32057e-305	0.405983	0.857195	0.708728	0.013774	2.09398e-305	0.659938	0.937229	0.900033	0.0627484
AT1G27760	-0.0157281	0.0015233	0.989003	-0.000310589	0.00104757	-0.000933097	-3.09929e-05	0	0.939365	0.044927	2.80149e-05	0.046459	0	0.985423	0.139116	0.000706504	0.153429
AT1G27770	-0.19008	-0.00665965	0.901584	-0.174375	0.00882244	-0.00179044	-0.000292665	0	8.10035e-18	0.000673466	0.105604	0.000153377	0	3.40139e-16	0.00507273	0.370541	0.00159151
AT1G27840	0.021047	0.123131	0.907383	0.0273265	-0.0079439	-0.00221473	8.57428e-05	2.34256e-258	0.313489	0.0220117	0.134291	0.406756	3.6045e-258	0.566234	0.0819376	0.424558	0.617208
AT1G27900	-0.325602	0.0246019	0.88189	-0.442821	0.00311219	0.00457751	-0.00013006	9.57566e-204	2.95012e-50	0.412847	0.00473252	0.250738	1.40439e-203	5.198e-48	0.624343	0.0472992	0.46399
AT1G27910	-0.0109057	-0.052705	0.891333	-0.0199926	0.00624317	0.000742426	-0.000109446	0	0.115732	0.000123448	0.284305	0.0238959	0	0.30214	0.00119666	0.607361	0.0936046
AT1G27920	0	0	0.997273	-0.0202662	0.00208148	0.0022751	-0.000136143	2.12125e-199	0.56064	0.641792	0.228276	0.310033	3.09742e-199	0.781798	0.80453	0.544149	0.522606
AT1G27921	0.0182513	-0.0196262	0.0779586	-0.0194529	-0.00570553	0.00293779	0.000241336	2.78046e-17	0.0397242	2.42092e-06	1.24667e-08	2.18569e-11	3.08878e-17	0.141544	3.93389e-05	7.64568e-07	1.06743e-09
AT1G27960	-0.0327025	0.053851	0.924759	-0.0679329	0.00371527	0.00115114	-0.000258527	0	0.000155749	0.105977	0.240137	0.000159822	0	0.00131786	0.259141	0.560339	0.00164698
AT1G27970	-0.0023755	0.0156502	0.034632	-0.025491	-0.00208762	0.00124327	4.51196e-05	0.00139343	0.0218453	0.142158	0.04036	0.287012	0.00146552	0.0877525	0.316792	0.209639	0.502227
AT1G27980	-0.086298	-0.00402115	0.772658	-0.011508	0.0023937	-0.00272223	-0.000133509	5.27823e-184	0.6745	0.494738	0.0685977	0.201202	7.59612e-184	0.853275	0.693016	0.289437	0.404475
AT1G28010	-0.014671	-0.0625076	0.806499	0.0030269	0.00463602	0.000650447	-6.04623e-05	8.04206e-222	0.907405	0.163806	0.646845	0.54222	1.20143e-221	0.974117	0.349468	0.868971	0.726246
AT1G28050	0.000242723	-0.0154076	0.956568	-0.00161216	0.00186099	0.00012906	-3.67546e-05	0	0.665128	9.41001e-05	0.525321	0.00963583	0	0.848874	0.000950094	0.796607	0.0470585
AT1G28060	0.0347981	0.229197	0.976829	-0.019373	-0.00566669	0.00191982	-0.000288474	0	0.348592	0.0321175	0.0886358	0.000250944	0	0.604137	0.108523	0.336352	0.00241433
AT1G28090	-0.0250562	0.0826817	0.884021	-0.0320386	-0.0018373	0.00201002	-0.000186871	5.60059e-240	0.242545	0.600407	0.178967	0.0737633	8.50691e-240	0.483262	0.772185	0.482797	0.211611
AT1G28100	-0.0322795	0.000176405	0.931533	-0.00957968	-0.00109286	-0.000708602	3.71633e-05	0	0.250565	0.305595	0.119262	0.2423	0	0.49496	0.522665	0.396864	0.454174
AT1G28130	0.00370768	-0.0185833	0.922589	0.0153482	0.000730482	-0.000344579	1.35661e-05	0	0.211018	0.641728	0.606742	0.77181	0	0.443106	0.80453	0.842522	0.885192
AT1G28230	-0.0125464	-0.00455233	0.997029	-0.00145247	-0.000350815	-8.21945e-05	1.83158e-05	0	0.706669	0.486784	0.697587	0.223984	0	0.8709	0.687233	0.894591	0.431266
AT1G28240	-0.00597419	-0.0229969	0.894861	0.00469554	-0.00581573	-2.98693e-05	0.000278659	0	0.682181	7.36607e-05	0.961917	1.83241e-10	0	0.856758	0.000770565	0.998762	7.4507e-09
AT1G28250	-0.0019115	-0.028578	0.956932	0.0105584	0.00321386	-0.000643041	-6.23796e-05	0	0.0149701	7.09481e-09	0.00660243	0.000162688	0	0.0650807	1.85331e-07	0.0608507	0.00166885
AT1G28260	0.0339446	0.0398498	0.70579	0.0111511	-0.00333989	-0.000108892	7.17392e-05	6.77245e-126	0.713198	0.38953	0.947543	0.535056	9.09947e-126	0.874635	0.602379	0.993074	0.719842
AT1G28310	0.00885894	0.0225533	0.365638	0.0381819	-0.00145344	-0.000897466	-1.71385e-05	3.77953e-16	0.407039	0.805152	0.720921	0.922229	4.18725e-16	0.660331	0.906086	0.905788	0.968804
AT1G28320	0.0198869	-0.150464	0.190819	0.0100905	-0.0025968	0.0016821	0.000460238	5.76427e-13	0.710318	0.45499	0.256384	8.82687e-06	6.30757e-13	0.873057	0.661845	0.578022	0.000133532
AT1G28330	-0.00705119	-0.00658723	0.956791	0.000229078	-0.000756308	-0.000273139	4.3493e-05	0	0.954122	0.137655	0.208612	0.00416606	0	0.991758	0.310249	0.523647	0.0247104
AT1G28380	0.0143559	-0.059462	0.878063	0.0657817	0.00429102	-0.00200539	-4.57078e-05	0	1.91841e-10	0.00116794	0.000373207	0.245781	0	4.08502e-09	0.00804225	0.00629187	0.458403
AT1G28390	0	0						1	1	1	1	1	1	1	1	1	1
AT1G28410	-0.0263864	0.00735675	0.87273	-0.00932554	0.000808792	-0.000262829	-5.70182e-05	0	0.518263	0.66144	0.738569	0.300131	0	0.749878	0.818917	0.914662	0.515277
AT1G28420	-0.0376224	0.1034	0.801172	-0.124769	-0.00200339	0.00472097	-0.000122896	1.99222e-48	0.026429	0.780556	0.123648	0.566255	2.39461e-48	0.102766	0.893854	0.405801	0.744893
AT1G28490	-0.0176721	-0.0104869	0.945599	0.00424621	0.00275542	-0.000726379	-8.8147e-05	0	0.728161	0.0779223	0.275768	0.0583951	0	0.88186	0.208831	0.597997	0.180234
AT1G28510	0.000224092	-0.000762404	0.99659	0.000231828	0.000238183	5.44716e-05	-1.19983e-05	0	0.848994	0.126267	0.412182	0.00973766	0	0.94663	0.292206	0.715309	0.0474416
AT1G28520	-0.0292978	-0.0477667	0.735484	0.00835107	-0.00410493	-0.000790433	0.000281323	0	0.50363	0.0101859	0.245915	3.42148e-09	0	0.740443	0.0454471	0.566182	1.15152e-07
AT1G28530	-0.00697994	-0.00917562	0.965145	-0.0347385	0.00322631	0.00159771	-8.57383e-05	0	0.0109332	0.0674043	0.0322845	0.10318	0	0.0508392	0.187406	0.183034	0.26463
AT1G28560	-0.00219098	0.132643	0.649571	0.118427	-0.0028083	-0.00725967	-0.000147814	5.42898e-12	0.218138	0.821214	0.167329	0.690035	5.91475e-12	0.450731	0.917041	0.473525	0.836323
AT1G28570	-0.0110045	-0.0221761	0.935018	-0.00995198	0.00227035	2.34377e-05	-6.72857e-05	0	0.390918	0.126065	0.970455	0.128099	0	0.642897	0.291974	1	0.305089
AT1G28580	-0.00140631	-0.0240693	0.894304	0.0217963	-0.000245446	-0.000772491	5.90214e-05	0	0.000940031	0.770939	0.0316368	0.0187888	0	0.00637518	0.88728	0.180272	0.07883
AT1G28600	-0.016046	-0.0161704	0.945722	0.0125256	0.000178271	-0.000928704	2.07356e-05	0	0.0453616	0.823825	0.0065295	0.3848	0	0.156777	0.918473	0.0605361	0.597101
AT1G28610	-0.240672	0.130551	0.855023	-0.220196	-1.78105e-05	0.00242626	-0.000361576	2.2987e-78	2.89316e-06	0.997631	0.352272	0.0452373	2.9044e-78	3.5085e-05	1	0.67333	0.150685
AT1G28660	0.00367415	0.0111921	0.94026	0.0287954	-0.00365407	-0.000845647	9.52463e-05	0	0.00252803	0.00274145	0.104015	0.00878348	0	0.0150443	0.0159965	0.367695	0.0440449
AT1G28670	-0.0201799	-0.0137549	0.939801	0.0241944	-0.000879864	-0.00149293	4.257e-05	0	0.0273463	0.530534	0.0125682	0.30847	0	0.10585	0.71918	0.0977815	0.521036
AT1G28680	0.00530238	-0.00320135	0.98282	-0.00864046	0.000433866	0.000580952	-1.1048e-05	0	0.0497813	0.441322	0.0156109	0.510522	0	0.166893	0.650968	0.113679	0.702212
AT1G28710	0.0158953	0.0373369	0.826404	0.0389857	0.0050004	-0.000182651	-0.000307203	8.04273e-106	0.315049	0.313837	0.931243	0.0378245	1.05584e-105	0.567577	0.532706	0.988909	0.131665
AT1G28715	0.094476	-0.0237458	0.203374	0.0932305	-0.0123608	0.000241573	0.000572723	4.26767e-10	0.00526974	0.00383657	0.894575	6.92123e-06	4.61984e-10	0.0275154	0.0209195	0.977776	0.000108731
AT1G29030	0.0343014	-0.0475121	0.717513	0.0257297	0.005717	-0.000546373	-9.55609e-05	1.22822e-79	0.508933	0.251347	0.797104	0.519895	1.55557e-79	0.743379	0.463114	0.941037	0.710537
AT1G29040	-0.0440546	-0.00878638	0.775538	0.0203993	-0.0043122	-0.00210786	0.000163697	2.70078e-230	0.406127	0.169889	0.115612	0.0803399	4.06791e-230	0.659938	0.357858	0.391441	0.224134
AT1G29050	-0.0017067	-0.00341087	0.984565	0.00081587	0.000277251	-9.98302e-05	-2.88396e-06	0	0.745081	0.387821	0.465854	0.763046	0	0.890924	0.601166	0.755217	0.879689
AT1G29060	0.0153427	0.029722	0.901774	0.0147723	-0.00409462	-3.02608e-05	0.000105904	0	0.460554	0.109882	0.977894	0.165207	0	0.707568	0.265931	1	0.357809
AT1G29120	0.00359494	-0.0787957	0.811749	0.00985904	0.00572928	-0.00050838	-5.38761e-05	0	0.42255	0.00026972	0.448418	0.25028	0	0.67437	0.00236459	0.744133	0.463494
AT1G29220	-0.0237096	0.00162794	0.960336	0.00521881	-0.00103088	-0.000747871	1.99848e-05	0	0.67721	0.520422	0.274191	0.67583	0	0.854206	0.712449	0.596664	0.828317
AT1G29240	0	-0.0969737	0.88349	0.0825363	0.00983326	-0.00360933	-0.000193648	3.47548e-156	0.0148043	0.0246462	0.0512454	0.137918	4.84046e-156	0.0646098	0.088968	0.244275	0.318267
AT1G29270	0.165629	-0.101781	0.371098	-0.0270374	0.00521679	0.00509888	0.000164344	7.87714e-06	0.753125	0.642837	0.272119	0.626571	8.38574e-06	0.895835	0.805317	0.594991	0.791783
AT1G29310	0.000304734	-0.000860736	0.999096	-6.5465e-05	3.21053e-05	5.19742e-05	-2.10814e-06	0	0.954837	0.828141	0.409834	0.632357	0	0.991965	0.920772	0.713849	0.795731
AT1G29320	-0.00153217	-0.034145	0.896338	0.00999895	0.00330841	-0.00011015	-4.23427e-05	0	0.54081	0.113728	0.901713	0.496892	0	0.767176	0.272383	0.979997	0.690652
AT1G29357	8.1362e-05	0.00399972	0.00451518	-0.00094805	-0.000355303	4.69441e-05	7.19587e-06	0.00675915	0.579345	0.104417	0.614859	0.269708	0.0070724	0.79408	0.256434	0.848322	0.484152
AT1G29380	-0.00208473	-0.00859703	0.958266	-0.0169346	0.00307696	0.00088119	-0.000102763	0	0.244585	0.0746346	0.260943	0.0473036	0	0.486409	0.202069	0.582279	0.155458
AT1G29390	-0.00672734	-0.0161796	0.969137	-0.0165823	0.00240322	0.000473864	-5.75871e-05	0	0.00214586	0.00050757	0.107895	0.00517279	0	0.0130997	0.00401853	0.375904	0.0289973
AT1G29400	0.00334668	-0.00893936	0.977683	0.00870644	0.000585076	-0.000302663	-1.41868e-06	0	5.34716e-07	0.008457	0.00140005	0.830317	0	7.1823e-06	0.0393754	0.0184199	0.918264
AT1G29520	-0.00284169	-0.015632	0.96382	-0.0178588	0.00296872	0.000440438	-6.78841e-05	0	0.00747058	0.000509462	0.226539	0.00764367	0	0.0368243	0.00402995	0.542957	0.0392941
AT1G29550	-0.0687155	-0.0692969	0.797807	0.0223188	-8.06373e-05	-0.00390987	0.000159033	5.03327e-190	0.422676	0.981936	0.0100337	0.133955	7.28677e-190	0.67437	0.99985	0.0830994	0.312817
AT1G29600	0.0313869	0.0402464	0.989535	-0.0313247	0.00549735	0.0039167	-0.000387649	0	0.186457	0.0699585	0.00246213	1.79661e-05	0	0.409958	0.192659	0.0289212	0.00024914
AT1G29630	0.0109685	-0.0110513	0.924368	0.0486985	0.00524028	-0.00294981	-0.000151183	6.69693e-298	0.0569863	0.114457	0.0380218	0.127152	1.05799e-297	0.184347	0.273904	0.202842	0.304202
AT1G29660	-0.033902	-0.0169463	0.939116	-0.0491491	-0.00079585	0.00101927	6.21608e-05	0	1.07661e-12	0.3675	0.00679485	0.0181615	0	2.98592e-11	0.581195	0.0623046	0.0767273
AT1G29670	-0.00127184	-0.0129582	0.967923	0.00386924	0.00201119	-0.000262967	-4.72011e-05	0	0.00215747	1.18786e-35	0.000132559	9.53728e-23	0	0.0131349	7.11605e-33	0.00262988	2.09029e-20
AT1G29690	0.0265437	0.00518747	0.884538	0.0440401	-0.00201252	-0.0003394	5.11429e-05	0	0.0483291	0.480668	0.780305	0.547521	0	0.163662	0.682307	0.932919	0.72976
AT1G29720	-0.400317	-0.00041779	0.836098	-0.152864	0.0125697	-0.0115045	-0.000416597	6.72633e-32	0.0433452	0.190759	0.0133953	0.177458	7.784e-32	0.151391	0.385415	0.102356	0.37468
AT1G29750	-0.591238	-0.0159145	0.833729	-0.0656661	0.0137942	-0.0229258	-0.000438084	5.49544e-45	0.279917	0.0760514	4.68533e-12	0.0586326	6.55368e-45	0.531549	0.20504	5.07257e-10	0.180745
AT1G29800	0.00997591	0.0169892	0.994858	-0.0077295	0.000263374	0.000537597	-4.71249e-05	0	0.288014	0.777203	0.175558	0.089272	0	0.54133	0.891247	0.478503	0.240035
AT1G29810	-0.000248596	0.0064971	0.980755	-0.00143682	0.000727855	7.88769e-05	-4.35024e-05	0	0.755807	0.218194	0.754323	0.0135117	0	0.896775	0.420929	0.920471	0.061821
AT1G29820	-0.00103948	0.00632639	0.0637513	-0.0083461	6.59463e-05	0.000308497	-1.64535e-05	3.17801e-27	0.167851	0.932124	0.350084	0.475716	3.63005e-27	0.383209	0.976117	0.671473	0.672877
AT1G29840	0.0041424	0.0295157	0.969119	-0.00633064	-0.00308483	0.000306517	7.06764e-05	0	0.536064	0.0184378	0.582886	0.0699623	0	0.763402	0.0714169	0.829162	0.203589
AT1G29890	-0.197671	-0.0234644	0.910038	-0.102454	0.00686264	-0.00623426	-0.00018219	1.7147e-83	0.0336335	0.266037	0.0178082	0.321681	2.18402e-83	0.124837	0.480026	0.123191	0.535301
AT1G29940	-0.00454668	-0.0129813	0.971737	-0.00384488	0.000841025	0.000308721	-1.58821e-05	0	0.631046	0.411599	0.479662	0.60279	0	0.82891	0.623313	0.763784	0.774652
AT1G29960	0.0253828	-0.0213502	0.822844	0.0956441	0.00126665	-0.00451534	8.82304e-06	4.11296e-110	0.0115341	0.793724	0.0288156	0.951257	5.41922e-110	0.0530426	0.899897	0.169129	0.983772
AT1G29970	-0.00150451	0.00307395	0.00727842	0.000617303	-0.000462804	-2.15784e-05	8.44048e-06	0.00488467	0.816007	0.172728	0.881481	0.403954	0.005117	0.929948	0.3616	0.972616	0.614305
AT1G29990	0.00166979	0.0154436	0.0260144	-0.00916511	-0.000506365	0.000358454	-1.0611e-05	2.67083e-18	0.002734	0.195722	0.0317151	0.362848	2.97509e-18	0.0159842	0.391975	0.180603	0.574529
AT1G30040	0.0248314	0.0325466	0.950243	-0.0157836	-0.00259291	0.000989128	4.97146e-05	0	0.370559	0.250249	0.303667	0.459391	0	0.626145	0.461602	0.62586	0.659755
AT1G30080	-0.0469451	-0.00135152	0.824786	-0.0706607	0.00133185	0.00324917	-8.62861e-05	1.27229e-140	0.034997	0.757334	0.0802088	0.502144	1.74307e-140	0.128819	0.879933	0.318637	0.694836
AT1G30120	0.002506	-0.00142187	0.98552	0.00455407	-0.000290122	-2.43821e-05	1.20329e-05	0	0.0185965	0.241241	0.817336	0.102835	0	0.077542	0.450403	0.949936	0.264008
AT1G30240	0.0214171	-0.0873494	0.829395	-0.0528609	0.0134293	0.00232796	-0.000275796	0	0.0180479	2.66093e-06	0.0562801	0.00121082	0	0.0758553	4.26985e-05	0.257866	0.00906699
AT1G30270	0.0084731	-0.00275788	0.877497	0.000864479	1.89228e-05	0.000557041	2.11019e-05	0	0.922673	0.98675	0.251586	0.534239	0	0.979858	1	0.573067	0.719725
AT1G30280	-0.00571179	-0.0228832	0.957528	-0.00356697	0.00306603	7.64223e-05	-7.06647e-05	0	0.660741	0.00319183	0.863152	0.0225584	0	0.847576	0.0180275	0.965086	0.0896548
AT1G30300	-0.0981415	0.00843309	1.0094	-0.046222	-0.00346563	-0.00284566	0.000110321	0	0.0446047	0.239209	0.0234238	0.208595	0	0.154636	0.448472	0.147551	0.413111
AT1G30320	0.0106826	0.000577237	0.988103	0.00945283	0.000455727	-0.000218983	-1.42631e-05	0	0.0250664	0.39855	0.341428	0.375205	0	0.0981897	0.611782	0.662519	0.587181
AT1G30360	-0.001121	-0.0146204	0.963372	-0.00244885	0.00288465	-2.62335e-05	-7.16824e-05	0	0.351056	9.00913e-18	0.854705	8.02761e-13	0	0.606389	1.01195e-15	0.963179	5.22725e-11
AT1G30380	-0.00265647	0.00152126	0.999498	-0.00335569	-9.72158e-06	3.69316e-05	-3.59965e-06	0	1.60143e-20	0.833458	0.0610214	0.00897449	0	8.03937e-19	0.923484	0.270823	0.0446794
AT1G30410	-0.059248	-0.00292642	0.661622	-0.0294957	-0.00110416	-0.00176232	3.60448e-05	1.97073e-70	0.440703	0.82152	0.39844	0.804785	2.45617e-70	0.690531	0.917269	0.704107	0.904201
AT1G30420	-0.0134137	0.0561625	0.277931	-0.187902	-0.00179611	0.0103436	-0.00010159	8.94548e-05	0.00983172	0.847051	0.00918636	0.714254	9.47813e-05	0.0466955	0.931549	0.0779496	0.851796
AT1G30460	-0.0145927	0.0517894	0.786979	0.0234354	-0.0013271	-0.00208427	-2.13996e-05	6.75976e-115	0.508403	0.769746	0.280981	0.874133	8.94993e-115	0.74331	0.887158	0.603432	0.941603
AT1G30470	0.00903058	0.00297619	0.951304	-0.0215035	0.000596207	0.00131843	-2.05901e-05	0	0.00308262	0.521313	0.000881112	0.457279	0	0.0177	0.71315	0.0126683	0.657773
AT1G30475	-0.0611832	-0.179004	0.395772	0.0334081	0.0196897	-0.00392811	-0.00035567	4.65115e-12	0.569325	0.00875853	0.220031	0.112016	5.06793e-12	0.787328	0.0404233	0.535762	0.28019
AT1G30490	-0.0617709	-0.100951	0.606013	-0.424497	0.0266196	0.0162364	-0.000888593	1.418e-79	4.68473e-38	2.5949e-10	1.53622e-19	1.42206e-12	1.79517e-79	4.95259e-36	8.93403e-09	4.3139e-17	8.81287e-11
AT1G30500	-0.00537339	-0.00641709	0.963815	0.00265809	0.00072878	-0.000257776	-1.99166e-05	0	0.780649	0.550668	0.620583	0.58414	0	0.90961	0.735803	0.852685	0.758757
AT1G30540	0.0188334	-0.0412044	0.843087	0.0174397	0.00296161	-0.000150315	1.56253e-05	0	0.278402	0.150234	0.864028	0.798915	0	0.529993	0.328825	0.96518	0.900194
AT1G30545	-0.245754	-0.136942	0.231682	-0.177039	0.00417845	-0.0026433	0.000201193	0.00430892	0.0334796	0.694879	0.560616	0.526167	0.00451545	0.12442	0.840707	0.815689	0.714652
AT1G30580	0	0	0.999981	-9.63954e-05	6.98691e-06	7.2822e-06	-3.79281e-07	0	0.0651917	0.296192	0.0106669	0.0570129	0	0.203337	0.513125	0.0869805	0.17721
AT1G30590	-0.0706357	0.126356	0.520426	-0.208066	0.000840494	0.00539417	-0.000379203	8.02498e-35	1.60899e-06	0.87961	0.0226243	0.0218209	9.34947e-35	2.02782e-05	0.948679	0.14388	0.0873029
AT1G30600	0.00353574	-0.00674711	0.972501	-0.00232153	0.00227331	3.24578e-05	-5.47389e-05	0	0.752858	0.0159549	0.935684	0.0514675	0	0.895835	0.063766	0.989218	0.164879
AT1G30610	-0.0208834	-0.0392666	0.524862	-0.0356991	0.00518944	0.00194473	-0.000201403	1.45292e-32	0.430799	0.370724	0.431465	0.243642	1.68355e-32	0.682023	0.584135	0.729814	0.455834
AT1G30620	0.00296624	0.00866541	1.00174	-0.00471626	-0.00143625	0.00029206	3.28907e-05	0	0.352354	0.0268489	0.291104	0.0888669	0	0.60796	0.0947992	0.615351	0.239199
AT1G30640	0.133945	-0.0260485	0.720412	0.162444	0.00895972	-0.0011521	-0.000328428	5.90956e-232	8.84757e-13	0.00206153	0.352794	0.000150247	8.91145e-232	2.48451e-11	0.012727	0.67333	0.00156083
AT1G30680	0	0	0.999997	-0.00280142	6.19664e-07	0.000107795	-1.93645e-08	0	0.0652745	0.997457	0.193541	0.997333	0	0.203524	1	0.502067	1
AT1G30755	-0.0498624	-0.0515481	0.395984	0.0557069	-0.00852013	0.000366985	0.000361544	0.000601827	0.638028	0.573842	0.954696	0.423158	0.000634222	0.832605	0.753504	0.996094	0.630283
AT1G30820	-0.00285151	-0.00226748	0.998083	-0.000770771	-2.30171e-05	-1.16198e-05	1.94281e-06	0	0.632892	0.911229	0.894988	0.752129	0	0.829759	0.965829	0.977776	0.876077
AT1G30825	0.0274384	-0.0376276	0.908288	0.0245677	0.00398766	9.07183e-05	-8.52953e-05	0	0.237929	0.134332	0.936331	0.282448	0	0.476813	0.305288	0.989218	0.497271
AT1G30845	-0.217441	-0.229597	0.648835	-0.366103	0.014711	0.00705923	-9.76227e-05	1.24771e-72	3.63305e-23	0.00184831	0.000458447	0.488028	1.56112e-72	2.09273e-21	0.0116554	0.00740937	0.684047
AT1G30880	2.62486e-05	-0.00218137	0.996659	0.00152149	0.000112284	-4.77847e-05	-3.66624e-07	0	0.00222868	0.0777557	0.0783361	0.84673	0	0.0134771	0.208571	0.313414	0.925647
AT1G30890	-0.0107419	0.0054591	1.002	-0.00132149	-0.00084763	-0.000326846	1.61006e-05	0	0.739961	0.0961197	0.132391	0.288788	0	0.888705	0.242281	0.420822	0.503502
AT1G30970	0	0	1.0001	-0.000135112	-1.87655e-05	3.75311e-06	5.86423e-07	0	0.388461	0.349168	0.660576	0.32615	0	0.640732	0.564739	0.875236	0.537462
AT1G31020	0.118535	0.0405682	0.830683	0.105274	-9.46267e-05	-0.00142474	-4.72938e-05	0	1.08171e-06	0.972672	0.226408	0.565534	0	1.38268e-05	0.996505	0.542823	0.744664
AT1G31040	-0.000663847	-0.00110669	0.987903	-0.00074248	0.000299887	2.12103e-07	-2.70222e-06	0	0.88845	0.657905	0.999414	0.893471	0	0.965954	0.816227	1	0.951722
AT1G31050	0.0407668	0.00254846	0.821592	-0.00306924	-0.000593784	0.00171386	1.64925e-05	0	0.888704	0.832409	0.152024	0.843621	0	0.966113	0.922777	0.451301	0.925051
AT1G31070	0.00763222	0.0200456	0.947868	-0.000450592	0.00526466	0.000587523	-0.000286809	0	0.975115	0.00438971	0.455932	1.90317e-07	0	1	0.023327	0.749269	4.28618e-06
AT1G31120	-0.0205061	-0.034474	0.745877	0.0793233	0.000506907	-0.00491142	8.86177e-05	2.137e-199	0.00178949	0.876039	0.000393253	0.360058	3.11991e-199	0.0111225	0.947873	0.00650787	0.571741
AT1G31160	-0.0233	0.0543761	0.897891	-0.0364866	0.00124252	0.000800471	-0.000180162	0	0.0172548	0.526205	0.338265	0.0020398	0	0.0731377	0.716119	0.660191	0.0138756
AT1G31170	0	0	2.5884e-05	-0.000194441	3.10904e-05	5.40113e-06	-1.1733e-06	0.922244	0.474782	0.371734	0.715919	0.257914	0.933043	0.720813	0.585111	0.902912	0.469914
AT1G31175	-0.0478496	0.0324125	0.954221	0.0319171	0.00938659	-0.0037977	-0.0004615	0	0.0539129	9.39134e-06	2.62164e-05	2.64878e-13	0	0.176875	0.000125768	0.000675016	1.85952e-11
AT1G31180	-0.00355197	-0.0167529	0.952886	-0.00298315	0.00239121	9.11361e-06	-5.20074e-05	0	0.535576	0.000103874	0.972325	0.00460842	0	0.763001	0.00103026	1	0.0265969
AT1G31190	0.00132155	-0.033952	0.888851	0.04153	0.0037535	-0.00226823	-7.2948e-05	0	0.000927786	0.0193172	0.000915314	0.127041	0	0.00630642	0.0738727	0.0130556	0.304202
AT1G31220	-0.0128525	-0.0370747	0.931066	0.027148	0.00466067	-0.00167757	-0.000108609	0	0.192528	0.0803608	0.139929	0.171443	0	0.419001	0.214152	0.433188	0.366371
AT1G31310	-0.0774173	0.212292	0.520313	-0.0734075	-0.02827	-0.00321508	0.000773118	5.42367e-05	0.55371	0.0722557	0.624003	0.0894935	5.75205e-05	0.776715	0.197533	0.855814	0.240343
AT1G31330	-0.000302264	0.000371479	0.999818	-0.000222928	-2.47956e-05	-1.36323e-05	5.34577e-07	0	0.246458	0.313656	0.193898	0.465967	0	0.489214	0.532599	0.502413	0.664677
AT1G31360	-0.153031	0.177743	0.780628	-0.155145	0.0112348	0.000496153	-0.000936444	2.32989e-48	0.00464195	0.109094	0.868199	7.38474e-06	2.79899e-48	0.0246528	0.264522	0.966024	0.00011461
AT1G31410	0.0676511	0.163382	0.826473	0.0347618	7.06643e-05	-0.000308482	-0.000322889	2.85325e-141	0.299527	0.986849	0.865987	0.0114761	3.9126e-141	0.553114	1	0.965586	0.0541334
AT1G31480	0.00166081	-0.0394776	0.888963	-0.0156309	0.00341736	0.000849496	-4.43416e-05	0	0.358476	0.116611	0.360303	0.494394	0	0.615097	0.2778	0.678983	0.6891
AT1G31500	-0.208366	0.28882	0.873128	-0.206964	-0.00484182	0.00217636	-0.000510545	3.57068e-75	2.24661e-05	0.438289	0.413894	0.00608858	4.48694e-75	0.000233929	0.648404	0.716702	0.0329988
AT1G31540	-0.0293785	-0.111283	0.796573	-0.0103328	0.00291007	-0.00024053	9.80326e-05	1.54388e-249	0.669671	0.347698	0.855559	0.288364	2.3586e-249	0.851275	0.563839	0.963179	0.503447
AT1G31550	-0.0103519	-0.0383623	0.899551	0.0123397	0.00541913	0.000624005	-0.000181911	8.84589e-158	0.719618	0.229587	0.746638	0.182241	1.23469e-157	0.877269	0.435655	0.917337	0.380577
AT1G31650	0.000838072	-0.0337195	0.932259	0.0371641	0.000948274	-0.000958653	9.18454e-06	0	0.00444846	0.570521	0.178637	0.853696	0	0.0238223	0.751385	0.482778	0.930308
AT1G31760	0.0398231	-0.0312987	0.638449	0.122829	0.00213699	-0.000869308	-9.65144e-05	1.35565e-12	0.181482	0.857232	0.862669	0.785303	1.48108e-12	0.403863	0.937229	0.965086	0.893449
AT1G31770	-0.00585398	-0.00935196	0.940441	0.0300752	0.0044358	-0.002489	-0.000137185	0	0.212566	0.150718	0.0586241	0.135817	0	0.445042	0.329365	0.263674	0.315207
AT1G31860	0.0230005	-0.0278835	0.860147	0.0175354	0.00528513	-0.000635875	-0.000126574	0	0.329503	0.0216117	0.516882	0.0648373	0	0.583867	0.0807158	0.788367	0.193157
AT1G31870	-0.0555015	0.0326056	0.860389	-0.0120842	-0.00758791	0.000359187	0.000184449	2.78782e-251	0.642985	0.0229096	0.800615	0.0634585	4.26624e-251	0.835559	0.0840956	0.942446	0.190333
AT1G31885	0.0245339	-0.0110878	0.933693	0.0147832	-0.00402056	-0.0006099	0.000209536	7.84348e-133	0.704505	0.427735	0.776842	0.166645	1.06259e-132	0.869912	0.637946	0.930388	0.360178
AT1G31910	-0.0204259	-0.0878841	0.841025	-0.028126	0.00761064	0.00029562	-0.000100707	0	0.00349024	6.50916e-10	0.573607	0.00607884	0	0.0194924	2.05233e-08	0.823665	0.0329659
AT1G31930	-0.0151581	-0.00723606	0.9726	0.00378856	8.07609e-05	-0.00049605	7.43092e-06	0	0.583731	0.927258	0.188479	0.777999	0	0.797686	0.974314	0.495081	0.888961
AT1G31940	-0.0120835	0.00237109	0.991156	0.000412408	-0.000532767	-0.000460805	1.82475e-05	0	0.911173	0.259986	0.02232	0.195377	0	0.976366	0.47321	0.142448	0.396969
AT1G31970	0.000891013	0.036179	0.967529	-0.00608481	0.00224873	2.40595e-05	-0.000183189	0	0.575167	0.105468	0.967598	9.59136e-06	0	0.791129	0.258379	1	0.000143408
AT1G32070	-0.0290305	-0.0559598	0.820684	-0.0241005	0.00173795	0.000284018	3.86874e-05	0	0.0684868	0.304501	0.693922	0.442997	0	0.21105	0.520991	0.893094	0.646755
AT1G32130	-1.52885e-05	7.78855e-05	1.00004	4.99805e-05	-1.73031e-05	-1.60069e-06	5.54348e-07	0	0.549734	0.105542	0.725476	0.0818004	0	0.773796	0.258491	0.90859	0.22659
AT1G32170	0.000372434	-0.0258036	0.920421	0.00627184	0.00229315	-0.000265354	-2.71994e-05	0	0.0976541	2.20783e-06	0.198952	0.0595265	0	0.270923	3.62698e-05	0.511525	0.18225
AT1G32190	0.0388248	-0.0233983	0.878611	0.0424722	0.00052477	-0.000418562	5.18672e-05	0	0.00245922	0.769942	0.584346	0.331989	0	0.0146932	0.887158	0.83007	0.543299
AT1G32200	0.0055918	-0.0069014	0.971229	0.00539781	0.000875683	0.000326508	-3.30631e-05	0	0.271645	0.163352	0.222896	0.0773413	0	0.521135	0.348805	0.53857	0.218481
AT1G32210	-0.000928284	0.000772545	0.994488	-0.00105506	-0.000178965	4.79325e-05	5.44898e-06	0	0.360076	0.224977	0.445963	0.215001	0	0.615961	0.430411	0.741841	0.421334
AT1G32220	0.000119745	-0.000151741	0.995776	-0.00351434	0.000413217	0.000159848	-1.71909e-05	0	0.00573779	0.011127	0.0212712	0.000393099	0	0.0295641	0.0485139	0.138309	0.00351832
AT1G32230	-0.0816702	0.258359	0.740892	-0.156662	-0.0203306	0.00410509	0.000254011	7.2712e-160	2.81002e-08	1.77724e-08	0.00764981	0.0181869	1.01869e-159	4.60782e-07	4.32799e-07	0.0680364	0.0767987
AT1G32240	0.0182078	0.0365978	0.909066	0.0238852	-0.0069989	-0.000794429	0.000207617	0	0.310516	0.0201971	0.536383	0.0207545	0	0.5629	0.0765786	0.804135	0.0843309
AT1G32310	0.00431726	0.00694288	0.997232	-0.000405419	-0.000392741	8.76033e-05	3.01898e-06	0	0.874191	0.230579	0.530564	0.757097	0	0.957423	0.436758	0.799534	0.877152
AT1G32330	-0.0267135	-0.132344	0.620944	-0.100364	0.00393176	0.00347036	0.000175831	4.75412e-97	0.000988696	0.313206	0.0368322	0.130103	6.16547e-97	0.0066439	0.532137	0.199107	0.30774
AT1G32370	-0.0485797	-0.136927	0.24164	0.0204706	0.00311205	-0.00123853	0.00012957	2.6944e-20	0.445928	0.365094	0.397924	0.205664	3.01818e-20	0.695732	0.579959	0.704018	0.410193
AT1G32380	-0.020143	-0.0194404	0.910404	0.00970877	0.00215991	-0.00135471	-5.20183e-05	0	0.540372	0.287054	0.117358	0.389508	0	0.766864	0.503704	0.393937	0.602016
AT1G32490	0.00217894	0.00217894	1.00064	0.000108947	-0.000163421	2.72368e-05	4.25575e-06	0	0.923661	0.261249	0.660576	0.32615	0	0.979858	0.474642	0.875236	0.537462
AT1G32530	-0.0158092	0.0242223	0.991999	-0.00287417	-0.000781245	-0.000102568	-4.40862e-05	0	0.749455	0.497463	0.834523	0.198792	0	0.89342	0.694239	0.956021	0.401336
AT1G32540	0.0190631	0.0349853	0.998571	-0.00183839	-0.00264978	0.00090209	2.85564e-05	0	0.772584	0.00113087	0.00933844	0.238962	0	0.905817	0.00781694	0.0790163	0.449604
AT1G32550	-0.00480223	0	1.0008	-0.00628594	-0.000298375	0.000177322	1.0181e-05	0	0.00127735	0.232081	0.0958043	0.171152	0	0.00829954	0.438678	0.353228	0.365914
AT1G32700	-0.00211741	-0.00750232	0.978017	-0.00199466	0.000704918	6.1222e-05	-1.03614e-05	0	0.426523	0.0280637	0.654613	0.27858	0	0.677761	0.0980484	0.874699	0.492682
AT1G32740	-0.0284579	0.0393486	0.784183	-0.0318239	-0.00894871	-0.0023601	0.00036468	6.41362e-28	0.664808	0.340951	0.555857	0.192757	7.34549e-28	0.848874	0.557558	0.812752	0.393918
AT1G32750	-0.00440926	0.00533508	0.975664	-0.00779609	0.000873056	6.44277e-05	-4.47423e-05	0	0.299609	0.363921	0.875142	0.118383	0	0.553114	0.578819	0.969193	0.290256
AT1G32790	0.0151215	-0.0143561	0.882647	0.0553103	0.00249877	-0.00234891	-5.29144e-05	0	0.0131995	0.381508	0.0536985	0.533967	0	0.0590691	0.593838	0.250667	0.719679
AT1G32810	-0.00227227	0.173884	0.875433	-0.0955492	-0.00141793	0.00395346	-0.000361042	7.31681e-98	0.0255074	0.795576	0.0902515	0.0268291	9.49991e-98	0.0995264	0.901406	0.340072	0.102242
AT1G32870	-0.022871	-0.0193144	0.966446	0.0158172	0.00126874	-0.00122983	-1.68333e-05	0	0.11078	0.317411	0.0230372	0.656177	0	0.294438	0.535937	0.145681	0.812736
AT1G32940	-0.0443443	-0.0498175	0.853035	-0.00882051	0.00669642	-0.000274535	-0.000163601	7.34468e-226	0.746408	0.0549983	0.853625	0.115627	1.10127e-225	0.891594	0.161808	0.963037	0.286705
AT1G33030	-0.0139124	-0.0319396	0.787245	-0.055895	-0.00070907	0.00401935	3.34846e-05	1.98389e-50	0.301347	0.918376	0.173092	0.870975	2.38971e-50	0.55433	0.969517	0.476211	0.940253
AT1G33050	-0.0418072	0.0685735	0.895114	0.00536895	0.0101739	-0.0024628	-0.000594113	0	0.567678	2.57934e-17	1.54634e-06	8.41869e-62	0	0.78666	2.60427e-15	5.83842e-05	1.88666e-58
AT1G33060	-0.00883269	-0.0319858	0.941987	0.020051	0.00475721	-0.00162011	-0.000118429	0	0.0967954	0.0020741	0.0139143	0.0100859	0	0.268956	0.0127919	0.105336	0.0486743
AT1G33110	0.0237544	-0.0245755	0.842427	0.0345498	0.0055017	-0.00113779	-0.00014629	0	0.0106746	0.00148421	0.12326	0.00457027	0	0.0499855	0.00974936	0.404829	0.0264276
AT1G33120	-0.000652221	-0.00781652	0.978004	0.000958752	0.000905586	-2.51119e-05	-1.86941e-05	0	0.418179	2.27453e-09	0.697504	3.45918e-05	0	0.669712	6.572e-08	0.894591	0.000445333
AT1G33230	-0.000111236	0.0010181	0.00205984	-0.000949226	-0.000123003	3.40632e-05	2.13652e-06	0.00339117	0.188152	0.182551	0.386659	0.437128	0.00355828	0.412011	0.374516	0.696017	0.642421
AT1G33240	0.0114598	0.0074188	0.986995	0.000775388	-0.000407354	0.000169497	8.72545e-06	0	0.814077	0.334216	0.346032	0.487556	0	0.92858	0.550552	0.667693	0.68369
AT1G33250	0.00745283	0.00149093	0.978703	-0.0076204	-6.03545e-05	0.000604265	3.3755e-06	0	0.262936	0.94475	0.103699	0.896503	0	0.509871	0.983495	0.367551	0.953144
AT1G33265	0.00664002	-0.00840941	0.851181	-0.0771141	0.0112611	0.00298468	-0.000437096	0	0.000694544	0.000108262	0.0161141	4.58039e-07	0	0.0048912	0.00107023	0.115639	9.24931e-06
AT1G33270	-0.0534703	0.022238	0.871213	-0.0536698	-0.00223364	0.000357529	6.2454e-05	0	0.00184043	0.31095	0.703683	0.341693	0	0.0113821	0.529391	0.896921	0.553534
AT1G33290	0.0192857	0.0798316	0.858957	-0.0230808	-0.00691666	0.00172051	6.64569e-05	0	0.210243	0.00333975	0.0869051	0.343984	0	0.442757	0.0186752	0.333019	0.555509
AT1G33360	0.00234299	-0.00420326	0.977352	0.00989955	0.000856855	-0.00054331	-1.49562e-05	0	0.194585	0.380195	0.191917	0.607201	0	0.422163	0.592717	0.500501	0.777498
AT1G33400	0.163307	0.16086	0.234239	0.0604893	-0.00597098	0.00121466	-4.34186e-05	0.00408839	0.469834	0.5771	0.790215	0.891752	0.00428585	0.716188	0.755951	0.9389	0.951075
AT1G33410	-0.522123	-0.00630379	0.902574	-0.253505	0.00374625	-0.0118605	-0.000134131	2.09979e-149	1.02376e-12	0.410377	9.81632e-10	0.322546	2.90511e-149	2.84814e-11	0.622073	7.11366e-08	0.536145
AT1G33490	-0.0291748	-0.043274	0.858526	-0.00150675	0.00537485	-0.00123532	-0.000116321	0	0.903842	0.000756237	0.0694392	0.0144232	0	0.973035	0.00557773	0.291221	0.0649332
AT1G33560	0.036443	-0.0021347	0.906962	0.0366061	0.00103407	-0.00118186	2.0085e-06	0	0.0767541	0.695969	0.294913	0.979677	0	0.227929	0.841096	0.619171	0.99755
AT1G33680	-0.000130762	0.0965548	0.938334	-0.0471585	-0.00362614	0.00299627	-0.000104727	0	7.19832e-05	0.0170447	3.77876e-06	0.02075	0	0.000662747	0.0671804	0.000128136	0.0843309
AT1G33720	0.0303326	0.0116302	0.065871	-0.0316891	-0.00494245	0.00345592	0.000126971	0.0153792	0.257364	0.168	0.0226905	0.235032	0.0160359	0.504469	0.355211	0.144096	0.445317
AT1G33780	0.00712298	-0.108638	0.801183	0.0257585	0.00730315	-0.000886473	-6.27128e-05	0	0.161393	0.00191343	0.377009	0.371117	0	0.373977	0.011957	0.690741	0.583017
AT1G33810	-0.00160538	-0.000814348	0.993365	0.00169112	8.14504e-05	-0.000143253	-1.44585e-06	0	0.107463	0.544534	0.0124391	0.718087	0	0.288085	0.730697	0.0969449	0.854214
AT1G33811	0.00700657	0.0211879	0.993708	0.002546	-0.00234028	0.000143484	4.46322e-05	0	0.680531	0.00309489	0.670589	0.0583017	0	0.855878	0.0175717	0.879438	0.180158
AT1G33970	-0.00176026	0.0117465	0.971257	0.002787	-9.09401e-05	-0.000225376	-1.43523e-05	0	0.663125	0.91154	0.518473	0.556229	0	0.848806	0.965913	0.789795	0.737208
AT1G33980	0.0302289	-0.00919412	0.92626	0.0163006	0.00371365	0.000264874	-0.000111275	0	0.171602	0.0149196	0.683867	0.0143628	0	0.389889	0.060645	0.887922	0.0647264
AT1G33990	0.00163218	0.00110894	0.988861	0.00465772	0.000247596	-0.000146538	-1.36622e-05	0	0.000121249	0.110275	0.0266518	0.0031018	0	0.00104966	0.266665	0.161166	0.0195599
AT1G34010	-0.0510533	-0.0940804	0.614933	0.00820407	0.0124143	-0.00239996	-0.00030935	1.95105e-101	0.780959	0.00100625	0.135945	0.00595083	2.54679e-101	0.909854	0.00709746	0.427257	0.0324681
AT1G34020	0.0068881	0.00984372	0.977461	0.00112527	-0.00118333	5.42928e-05	3.41418e-05	0	0.86751	0.170322	0.882706	0.184259	0	0.953922	0.358215	0.972687	0.382833
AT1G34040	0.00720656	-0.0167141	0.969002	0.00944137	-0.00131557	-0.000458783	7.71171e-05	0	0.44637	0.406919	0.497602	0.102767	0	0.695968	0.619277	0.774478	0.263923
AT1G34044	-0.0311727	-0.150125	0.50359	0.0038029	0.00758377	-0.00228157	1.48808e-05	4.64772e-05	0.97476	0.603857	0.710737	0.971207	4.93086e-05	1	0.774596	0.900859	0.992524
AT1G34065	0.0132597	-0.119707	0.651903	0.0378553	0.0165177	0.00240302	-0.000377219	1.17688e-11	0.737477	0.206554	0.675746	0.336468	1.28001e-11	0.886907	0.405881	0.881731	0.54873
AT1G34120	-0.0118489	0.0282138	0.83831	0.0416563	0.00178411	-0.00448037	-7.44347e-05	1.3054e-83	0.348061	0.753429	0.0643142	0.660051	1.66293e-83	0.603915	0.878027	0.27827	0.815961
AT1G34150	0.126039	0.111477	0.877002	0.0866275	-0.0070885	0.00204718	4.76416e-05	7.03337e-276	0.000632952	0.028855	0.138815	0.622033	1.0963e-275	0.0045198	0.0999196	0.431772	0.788487
AT1G34180	0.0330843	-0.136064	0.741254	0.0716421	0.0152973	-5.86304e-05	-0.000402165	8.45786e-31	0.277026	0.069655	0.98699	0.109444	9.76642e-31	0.527806	0.192177	1	0.276021
AT1G34190	0.00322438	-0.000716614	0.986475	0.00240293	-0.000280061	0.000104097	1.34564e-05	0	0.370867	0.414972	0.477342	0.188664	0	0.626226	0.626009	0.761242	0.388496
AT1G34200	-0.00488567	0.0824381	0.91141	-0.0587755	-0.00404517	0.00227346	-2.88782e-05	0	0.0133376	0.183128	0.0793337	0.749767	0	0.0594797	0.374936	0.31656	0.87442
AT1G34210	-0.0448679	0.00583679	0.934705	-0.00422699	0.00288199	-0.00228827	-0.00011206	0	0.732776	0.0688311	0.000703819	0.0175753	0	0.884584	0.190313	0.0105938	0.0747428
AT1G34220	-0.0135719	-0.00459787	0.967483	-0.00869167	0.000543996	-0.000150084	-8.51606e-06	0	0.136132	0.465959	0.637123	0.701681	0	0.334505	0.671586	0.863812	0.844536
AT1G34245	-0.0115614	-0.0470148	0.844258	0.0213283	0.00572087	-0.00114311	-0.000156997	1.53778e-120	0.565372	0.228113	0.572224	0.266973	2.05083e-120	0.784956	0.434193	0.822852	0.481055
AT1G34260	-0.0596099	-0.00167575	0.949231	-0.208188	0.00770172	0.00602228	-0.000244912	4.05947e-192	2.60125e-10	0.0676003	0.000803493	0.0511062	5.89502e-192	5.44867e-09	0.187718	0.0117401	0.163956
AT1G34270	0.0912381	0.0729125	0.535176	-0.0673693	0.0061341	0.00509754	-0.000336257	1.53897e-46	0.078802	0.210977	0.0147747	0.0213717	1.83996e-46	0.232321	0.411423	0.109272	0.086042
AT1G34300	-0.0208006	0.0449925	0.839485	-0.0279431	0.0171213	-8.85675e-05	-0.000835203	0	0.223134	5.40483e-09	0.943574	1.27498e-21	2.51542e-308	0.456464	1.4673e-07	0.991176	2.38687e-19
AT1G34315	0	0						1	1	1	1	1	1	1	1	1	1
AT1G34320	-0.00450891	-0.0724425	0.834356	0.0160721	0.0060815	-0.000843609	-7.87833e-05	0	0.284931	0.00156421	0.303561	0.169134	0	0.537257	0.0101634	0.62586	0.363393
AT1G34330	-0.0162942	-0.0230178	0.162952	0.0355198	0.00210756	-0.00140471	-4.456e-05	1.01557e-10	0.169577	0.524119	0.319389	0.651255	1.10124e-10	0.386455	0.714934	0.643216	0.809444
AT1G34340	-0.156516	-0.259364	-0.049396	-0.0247639	0.0415859	-0.00409254	-0.00115116	0.116719	0.443327	8.14755e-24	0.0202207	8.94111e-21	0.120529	0.693266	1.83035e-21	0.133999	1.54509e-18
AT1G34360	0.010646	-0.059714	0.865157	0.0267842	0.00430012	-0.00107832	-2.43034e-05	0	0.0351432	0.0082033	0.12002	0.616056	0	0.129108	0.0384294	0.398313	0.783623
AT1G34370	-0.0108221	0.0171877	0.874892	-0.0209494	-0.00146857	-6.80027e-05	3.07709e-05	0	0.128119	0.404462	0.927863	0.557699	0	0.321048	0.617377	0.988219	0.738227
AT1G34380	0.114629	0.001506	0.793595	0.036383	0.00428091	0.00390007	-0.000193701	8.85879e-67	0.440423	0.478017	0.129547	0.281284	1.09785e-66	0.690397	0.680092	0.416647	0.496001
AT1G34430	0.000102201	-0.00290712	0.993327	-0.00331419	0.000216982	0.000163245	-2.8214e-06	0	0.0505447	0.317028	0.0774922	0.66236	0	0.168658	0.535392	0.311509	0.818017
AT1G34470	-0.308433	0.0177699	0.77635	-0.170879	-0.000614875	-0.00469901	-2.84618e-05	2.62643e-45	0.00243972	0.932072	0.126591	0.894652	3.13428e-45	0.0146155	0.976117	0.410372	0.952409
AT1G34550	-0.0101456	-0.0510755	0.879692	0.0129469	0.0114763	-0.00131206	-0.000337474	0	0.303212	9.8128e-13	0.0558058	1.92428e-12	0	0.556189	5.18693e-11	0.256901	1.14514e-10
AT1G34570	-0.111497	-0.0265899	0.78082	0.0264661	0.0107692	-0.00841803	-0.000356418	2.92325e-171	0.356686	0.00337474	7.71111e-08	0.00112971	4.15441e-171	0.612756	0.0188356	4.00532e-06	0.0085213
AT1G34630	-0.159877	-0.218892	0.470711	-0.0171548	0.0115909	-0.00594979	2.42548e-05	2.24611e-35	0.659262	0.0198814	0.00505939	0.870095	2.61886e-35	0.846788	0.0756367	0.0499928	0.939744
AT1G34750	-0.0319729	0.00521785	0.982513	-0.0360911	-0.00263539	0.00126259	7.47761e-05	0	0.00451666	0.105089	0.0686171	0.122752	0	0.0241195	0.257591	0.289437	0.297799
AT1G34760	0.00258567	0.00168209	0.984564	0.0131456	-0.00160218	-0.000402364	5.93364e-05	0	0.00290549	0.00456144	0.0948033	0.000422482	0	0.0168443	0.0239983	0.350866	0.0037147
AT1G34770	-0.0264768	-0.0114847	0.0362199	-0.000492013	-0.00103922	-0.000497877	1.86619e-05	0.131335	0.98406	0.741528	0.710946	0.84243	0.135481	1	0.870687	0.900859	0.92424
AT1G34780	0.0206907	-0.0175135	0.921582	0.0159583	0.00148144	-0.000209451	6.54296e-06	0	0.0436141	0.143178	0.627361	0.828194	0	0.152082	0.318078	0.85741	0.917538
AT1G34844	-0.00313876	0.0126886	0.0187709	0.000418254	-0.00131056	-3.62279e-05	2.49157e-05	4.54745e-06	0.92068	0.0147393	0.874378	0.119695	4.84795e-06	0.979858	0.0600173	0.968985	0.292082
AT1G35160	0.00426734	-0.00357301	0.976267	0.00460606	0.000778846	-6.67984e-05	-2.1787e-05	0	0.0250532	0.00306423	0.551432	0.00543399	0	0.0981808	0.0174605	0.811062	0.0302149
AT1G35220	-0.022793	0.0895109	0.945792	-0.0369574	9.85462e-05	0.000397729	-0.000196387	0	0.117381	0.973966	0.757403	0.0290562	0	0.304676	0.997123	0.92185	0.10825
AT1G35250	0.00952122	0.0629416	0.652546	0.025134	-0.00434748	-0.0048612	0.000194408	5.02492e-40	0.619076	0.501493	0.0779713	0.313094	5.93038e-40	0.821109	0.696833	0.312329	0.526188
AT1G35320	-0.112031	0.0539084	0.273374	-0.00101209	-0.0100702	-0.0033215	0.000241906	6.98553e-10	0.982246	0.0835224	0.180677	0.162941	7.55652e-10	1	0.219065	0.484858	0.354594
AT1G35340	0.0126057	-0.0110617	0.707821	-0.0252875	0.00947229	0.00160454	-0.000368685	0	0.122679	6.202e-06	0.0725939	3.55373e-09	0	0.313536	8.70799e-05	0.300336	1.18713e-07
AT1G35350	0.00508119	-0.19199	0.63793	0.081232	0.0164636	-0.00482972	-0.000224884	3.65106e-80	0.0186046	0.000193007	0.0103236	0.087442	4.62677e-80	0.077542	0.00178432	0.0851866	0.236602
AT1G35420	-0.0470344	-0.0123167	0.913184	-0.0864129	0.00102355	0.00153077	1.04458e-07	0	3.75393e-28	0.308426	0.000353746	0.997216	0	2.65613e-26	0.525946	0.00604327	1
AT1G35460	-0.0115337	-0.0177785	0.952904	0.0160879	-0.00217453	-0.00116588	0.000110711	0	0.137319	0.116474	0.0484062	0.00731274	0	0.336392	0.27763	0.237035	0.0380059
AT1G35470	-0.00956863	-0.0542608	0.869907	-0.0424479	0.00643433	0.000747909	-0.000141746	0	0.00323755	0.000486191	0.341656	0.00990679	0	0.0184481	0.00388693	0.662664	0.0480942
AT1G35510	-0.0468778	0.00183704	0.885812	-0.0227889	-0.00339859	-0.000849035	0.000138654	0	0.141531	0.086598	0.31539	0.0189578	0	0.342602	0.22497	0.639173	0.0791979
AT1G35513	0	0						1	1	1	1	1	1	1	1	1	1
AT1G35580	-0.000803732	0.0044349	0.995889	-0.000219534	-0.00053802	-8.36142e-06	1.03736e-05	0	0.859376	0.000689608	0.901561	0.0280856	0	0.950995	0.00516444	0.979997	0.105863
AT1G35620	-0.0010465	-0.00277727	0.98046	-0.00106554	0.00048017	4.27596e-05	-1.05577e-05	0	0.566614	0.0435515	0.673371	0.136371	0	0.785982	0.135981	0.881265	0.315914
AT1G35660	0	-0.00405902	0.992721	-0.010599	0.000848369	0.000422174	-2.17549e-05	0	0.15825	0.377379	0.302919	0.447427	0	0.368822	0.589762	0.625323	0.650348
AT1G35670	-0.00240378	-0.00899329	0.982205	0.00687153	0.000254894	-0.000197395	3.68803e-06	0	6.78172e-05	0.248079	0.0359283	0.574875	0	0.000631508	0.45869	0.196459	0.75194
AT1G35680	-0.00087219	0.000700111	0.999111	0.000198073	-3.47193e-05	-5.04245e-05	-3.64271e-07	0	0.560016	0.42459	0.00653461	0.778582	0	0.781536	0.63499	0.0605361	0.889121
AT1G35780	0.0332279	0.00277543	0.853826	-0.0200587	0.00654715	0.00176864	-0.000257057	0	0.238788	0.00265303	0.0569147	7.48947e-05	0	0.478215	0.0155614	0.259263	0.000865043
AT1G36050	-0.0168721	-0.047203	0.144597	0.0241989	0.0017454	-0.0012618	-2.3027e-05	1.66397e-05	0.482431	0.692122	0.501998	0.860819	1.76889e-05	0.726883	0.839213	0.779228	0.934556
AT1G36070	-0.00549857	-0.159552	0.497778	0.0294408	0.0091653	-0.00168291	-3.97473e-06	1.26352e-60	0.343674	0.0212161	0.3211	0.973247	1.54771e-60	0.598694	0.0797023	0.644635	0.993366
AT1G36180	-0.0373722	-0.027066	0.943614	0.00144186	0.00124567	-0.000947494	2.54226e-05	9.64326e-163	0.967882	0.784898	0.633029	0.853182	1.35673e-162	0.997635	0.895681	0.860966	0.93004
AT1G36370	0.00389862	-0.0227358	0.939259	0.00370139	0.00365671	-9.67057e-05	-9.40758e-05	0	0.592924	3.65851e-05	0.797929	0.000364775	0	0.804348	0.000413007	0.941236	0.00331768
AT1G36940	0	0						1	1	1	1	1	1	1	1	1	1
AT1G36980	-0.0107496	-0.00638852	0.981525	-0.0152507	0.00128985	3.43399e-05	-3.41324e-05	0	4.22119e-10	3.6483e-05	0.796575	0.000245618	0	8.60127e-09	0.000412372	0.941037	0.00236816
AT1G37130	1.94174e-05	-0.00297147	0.993697	0.00194582	0.00024517	-7.15329e-05	-3.36343e-06	0	1.68915e-06	2.42015e-06	0.0012549	0.0299466	0	2.11109e-05	3.93389e-05	0.0170083	0.110559
AT1G38131	-0.00824618	0.00599349	0.97768	-0.0137012	-0.00134797	0.0016322	8.96049e-06	0	0.497755	0.604005	0.144965	0.907981	0	0.735422	0.774596	0.440683	0.959345
AT1G42430	-0.00465708	0.0430462	0.960286	0.0035405	0.000801633	-3.28527e-05	-0.000162362	0	0.738581	0.554783	0.954733	5.95197e-05	0	0.887713	0.738998	0.996094	0.000709342
AT1G42440	0.000415175	0.000415175	1.00033	-0.00113838	-0.000172004	5.18139e-05	5.79424e-06	0	0.42345	0.344501	0.504244	0.28518	0	0.67498	0.560711	0.78063	0.500025
AT1G42470	-0.00749362	-0.022947	0.874404	0.0413718	0.00753589	-0.00160868	-0.000254704	0	0.0600021	0.00741378	0.180076	0.00238621	0	0.192138	0.0355497	0.484267	0.0156889
AT1G42480	-0.0504092	-0.0539201	0.882729	-0.0147906	0.0010158	-0.000718164	5.03463e-05	0	0.292393	0.571946	0.348704	0.34714	0	0.546587	0.752049	0.670298	0.559132
AT1G42540	-0.586722	0.0961962	0.813647	-0.635329	-0.00616608	0.00301077	1.50807e-05	2.69769e-57	6.27897e-34	0.356994	0.291528	0.939731	3.28609e-57	5.47794e-32	0.571521	0.615958	0.97759
AT1G42560	-0.00823086	-0.0144304	0.983769	0.00628588	0.00121971	-0.00028146	-4.61379e-05	0	0.544392	0.36801	0.660638	0.262225	0	0.769894	0.581798	0.875236	0.475472
AT1G42970	-1.55654e-05	1.69695e-05	0.999985	-2.81883e-05	-6.78178e-07	2.97214e-06	-7.09189e-08	0	0.576262	0.916305	0.280094	0.712256	0	0.792125	0.96824	0.602752	0.850655
AT1G43020	0.0659441	-0.0206493	0.688102	0.117337	-0.000114859	-0.00263466	0.000113376	1.55835e-87	0.00097882	0.979878	0.174844	0.403403	1.99506e-87	0.00659346	0.99963	0.477553	0.61366
AT1G43130	0.00286857	-0.0168312	0.969936	-0.0036125	0.00141008	0.00024813	-1.61995e-05	0	0.366369	0.00585406	0.255418	0.287976	0	0.622297	0.0294304	0.577093	0.503259
AT1G43190	0.00802468	-0.0684514	0.871572	-0.0598659	0.00298439	0.00249853	4.87315e-05	0	6.20571e-07	0.0521075	0.000137064	0.287149	0	8.22485e-06	0.155406	0.00268922	0.502227
AT1G43245	-0.107217	0.0220987	0.320119	-0.063962	-0.00876255	0.00107517	0.000221612	0.000168658	0.463759	0.432733	0.821393	0.50547	0.000178469	0.71018	0.642203	0.94994	0.69697
AT1G43560	-0.00682124	0.00535082	0.971963	0.00563335	0.00293049	-0.00100644	-0.000127473	0	0.37379	0.000298912	0.00358382	1.29645e-07	0	0.628886	0.0025679	0.0382473	3.09017e-06
AT1G43580	0.0121467	-0.0768634	0.869898	0.0454315	0.00607503	-0.001357	-7.50573e-05	0	1.49464e-10	2.15422e-11	0.000452682	0.00549971	0	3.23636e-09	9.26213e-10	0.00732937	0.0305064
AT1G43620	-0.0478218	-0.0227858	0.947728	-0.14171	0.00566885	0.0039561	-0.000146851	0	5.56236e-18	0.00689616	9.78344e-06	0.0188236	0	2.41466e-16	0.0336605	0.000289191	0.07883
AT1G43650	-0.0518997	-0.335453	0.378011	0.00117091	0.0435555	-0.000278115	-0.00100228	4.83125e-14	0.981846	3.69378e-11	0.921081	3.22982e-07	5.30599e-14	1	1.51563e-09	0.985406	6.86126e-06
AT1G43690	-0.0140893	0.0109655	0.976732	0.00420968	0.000581579	-0.000654428	-5.81056e-05	0	0.697633	0.674832	0.268244	0.159504	0	0.865929	0.828134	0.590277	0.350013
AT1G43700	-0.0118793	-0.0455978	0.916355	0.00582143	0.00315962	-0.00056666	-2.84271e-05	0	0.291073	7.50607e-06	0.0595934	0.176245	0	0.544642	0.000103134	0.266186	0.372995
AT1G43765	0.0856025	0.00276196	0.843733	-0.0558215	0.00631234	0.00391141	-0.000272474	3.89107e-30	0.492346	0.515983	0.347534	0.343097	4.48443e-30	0.732267	0.708747	0.669181	0.55451
AT1G43770	-0.143003	-0.203837	0.555362	-0.203024	0.0106607	0.00483048	-0.000104261	9.47989e-16	0.00400843	0.242306	0.210467	0.701421	1.04806e-15	0.0218302	0.451547	0.525349	0.844507
AT1G43850	0.000109899	0.000704185	0.993039	0.00222528	0.000435452	-0.000212782	-1.21278e-05	0	0.573069	0.388733	0.32328	0.420437	0	0.789934	0.601853	0.645348	0.628208
AT1G43860	-0.0291411	-0.105453	0.604402	-0.00528391	0.0133533	-0.000433075	-0.000278878	8.40427e-96	0.859524	0.00047266	0.790325	0.0142745	1.0882e-95	0.950995	0.00379904	0.9389	0.0644564
AT1G43890	0	0	0.999982	-0.000133226	3.29085e-06	5.37723e-06	-1.02839e-07	0	0.0525477	0.708195	0.151495	0.694652	0	0.173473	0.847495	0.450774	0.839487
AT1G44000	0.00387205	0.00601954	0.992484	0.00485417	-0.000262667	-0.000115915	-1.08859e-06	0	0.384809	0.713198	0.703642	0.959226	0	0.637753	0.850988	0.896921	0.987807
AT1G44125	0.0419468	0.171575	0.44371	0.101508	-0.0250511	-0.00346816	0.00056458	1.5088e-56	0.000410107	9.37092e-12	0.0269007	2.53067e-07	1.83565e-56	0.00309422	4.27447e-10	0.162017	5.49289e-06
AT1G44350	-0.0147041	0.0145721	0.976954	-0.0328546	-0.00162455	0.000948854	2.51929e-05	0	0.00104431	0.205159	0.0826539	0.509622	0	0.00697705	0.404432	0.32377	0.701403
AT1G44446	0.0207451	-0.0179481	0.92325	0.00318162	0.00203534	0.000558838	-3.55352e-05	0	0.604429	0.0095906	0.0953335	0.129068	0	0.811762	0.0432636	0.352103	0.306295
AT1G44575	-0.000261316	-3.56414e-06	0.999583	-0.00049298	3.12087e-05	5.31686e-06	-1.32614e-06	0	0.00247051	0.1342	0.549567	0.032681	0	0.0147509	0.305141	0.810267	0.118273
AT1G44740	0	0						1	1	1	1	1	1	1	1	1	1
AT1G44750	-0.02438	0.204446	0.37442	-0.0635414	-0.0156098	0.00464382	0.000104227	1.15377e-17	0.156894	0.00656539	0.057909	0.542451	1.28267e-17	0.366869	0.0323269	0.261525	0.726271
AT1G44760	0.0028813	-0.0174501	0.956682	0.0128189	0.00179863	-0.000449746	-2.82947e-05	0	0.0252853	0.0141557	0.150249	0.195229	0	0.0988314	0.0583502	0.448998	0.396907
AT1G44770	9.69219e-05	9.69219e-05	0.999883	6.45718e-05	2.58368e-05	-5.18766e-06	-1.14581e-06	0	0.755862	0.330865	0.647042	0.14782	0	0.896775	0.546576	0.869053	0.33266
AT1G44780	0.0146455	-0.0539246	0.914821	0.0388752	0.00594927	-0.000942643	-0.000126116	0	0.00199069	0.00021732	0.1694	0.00851398	0	0.0122355	0.00196068	0.473525	0.0428609
AT1G44790	-0.0180904	0.024559	0.93935	-0.102307	-0.000125912	0.00434764	-0.000102023	0	5.05324e-06	0.964993	0.000379316	0.232658	0	5.88192e-05	0.992604	0.00633556	0.442001
AT1G44800	0.00252881	-0.00186661	0.985393	0.00571398	0.000336283	-0.000250933	-8.13515e-06	0	0.00236786	0.162032	0.0144072	0.256264	0	0.0142516	0.347031	0.107595	0.468313
AT1G44820	-0.168418	-0.00621116	0.924076	-0.124172	0.00775418	-0.00275963	-0.00026295	0	9.497e-13	0.00049435	0.00364101	7.34156e-05	0	2.65857e-11	0.00393466	0.0386739	0.000850145
AT1G44835	0.0123323	0.0473817	0.963742	-0.00171962	-0.00304197	-0.000430381	6.70103e-05	0	0.933006	0.245113	0.699752	0.390167	0	0.982652	0.455362	0.895039	0.60262
AT1G44910	-0.0570522	0.112699	0.952463	0.0326692	0.00351928	-0.00580837	-0.000363305	7.74588e-67	0.56364	0.626827	0.0598504	0.0920806	9.60062e-67	0.784187	0.793047	0.267038	0.245312
AT1G44920	-0.0161762	-0.00503709	0.98157	-0.0169364	0.000284143	-5.41357e-05	-9.1477e-07	0	3.89882e-06	0.544918	0.786777	0.947846	0	4.63423e-05	0.73076	0.937165	0.982619
AT1G45010	0.0297363	-0.0963398	0.787404	0.00186292	0.0140928	0.0011721	-0.000366537	2.27161e-124	0.956377	0.00121917	0.528128	0.00475333	3.04622e-124	0.992685	0.00831852	0.797904	0.0272407
AT1G45050	-0.173998	-0.0493771	0.915854	0.0156858	-0.00165041	-0.00417071	8.58683e-05	1.09127e-31	0.844965	0.87224	0.340556	0.778857	1.26189e-31	0.94615	0.946235	0.662245	0.889189
AT1G45110	0	0						1	1	1	1	1	1	1	1	1	1
AT1G45150	-0.00295971	-0.00213885	0.00941655	0.00873562	0.000272694	-0.000373766	-1.12222e-05	0.329807	0.378202	0.829763	0.489487	0.766495	0.338393	0.633344	0.921434	0.769983	0.881347
AT1G45170	-0.00297785	-0.00622186	0.97967	0.00328903	0.000569583	5.66546e-05	-2.38801e-05	0	0.577353	0.450682	0.860333	0.288533	0	0.792688	0.658616	0.964459	0.503502
AT1G45201	0.000735522	0.00673351	0.985083	0.00110309	-0.00101745	0.000177739	2.159e-05	0	0.766723	0.0324572	0.380916	0.127721	0	0.903035	0.109318	0.692057	0.304865
AT1G45207	0.0119815	-0.0708907	0.838262	-0.00475853	0.00202486	0.000180401	4.55844e-05	5.94632e-145	0.887193	0.637066	0.921472	0.721485	8.18029e-145	0.965054	0.801169	0.985406	0.856441
AT1G45231	0.0028828	-0.00901354	0.967886	0.0148342	0.00312668	-0.000941997	-9.89663e-05	0	0.173533	0.0249578	0.113161	0.0172304	0	0.392591	0.0898162	0.386789	0.0737298
AT1G45248	0.0207676	0.0896583	0.812358	-0.0421143	-0.0140559	0.00179979	0.000443311	3.0092e-90	0.308694	0.00791846	0.425197	0.00494009	3.86627e-90	0.56125	0.0374108	0.72584	0.0279897
AT1G45249	0.0157116	0.0704514	0.861435	-0.0102332	-0.00465247	0.00349073	-7.79451e-05	0	0.625839	0.0831538	0.00229747	0.329935	0	0.825173	0.218428	0.0273445	0.540429
AT1G45332	-0.0375916	-0.0814684	0.771267	0.0526869	0.0106057	-0.00245285	-0.000331234	3.27831e-108	0.141162	0.0206048	0.209219	0.0152357	4.31316e-108	0.342093	0.0777962	0.524419	0.0675105
AT1G45474	-0.00614831	-0.00211638	0.972399	-0.0117135	0.00150765	0.000167898	-5.10305e-05	0	0.000835843	0.000777403	0.380094	0.000134672	0	0.00574666	0.00571197	0.691542	0.00141539
AT1G45688	-0.0187534	0.00555456	0.991049	-0.00805747	0.00020512	-0.000445451	-1.70578e-05	0	0.0533847	0.700697	0.0502728	0.28336	0	0.175463	0.842667	0.242426	0.498393
AT1G45976	0.00544275	-0.0198932	0.94831	0.0134267	0.00233878	-0.00035096	-4.22915e-05	0	0.00470091	0.000118769	0.175597	0.0195062	0	0.0248924	0.00115881	0.478503	0.0808501
AT1G47128	-0.00124505	-0.00481688	0.989172	0.00213982	0.000290765	-0.000122516	-9.58473e-07	0	5.71674e-05	1.92011e-05	2.40616e-05	0.636325	0	0.000545135	0.000234113	0.000626719	0.798271
AT1G47210	0.0379921	0.0889985	1.02244	0.015107	-0.00772861	0.000142691	0.000174307	5.84099e-116	0.741648	0.187425	0.954483	0.318367	7.74833e-116	0.889661	0.381036	0.996094	0.531635
AT1G47240	0.0340083	0.224639	0.971561	0.00313308	-0.00949242	-0.00112395	-2.50313e-05	8.43959e-226	0.919678	0.0169433	0.50727	0.832624	1.26523e-225	0.979852	0.0668949	0.782065	0.919218
AT1G47271	0	-0.0181585	0.974357	0.0188385	0.00249247	-0.000993707	-5.63596e-05	0	0.0751774	0.0400453	0.0602714	0.123975	0	0.225031	0.127977	0.268414	0.299634
AT1G47290	-0.0159512	0.00255392	0.9966	-0.0070557	-0.00194395	-0.000215875	6.59676e-05	0	0.252864	0.0138054	0.52135	0.00504188	0	0.498406	0.0572737	0.792833	0.0284052
AT1G47330	-0.00170832	-0.0028341	0.980465	-0.00951509	0.00116819	0.000353009	-3.40859e-05	0	0.267384	0.287194	0.450699	0.297297	0	0.515644	0.503753	0.745681	0.512472
AT1G47490	-0.0541349	-0.0547977	0.759989	-0.0824844	0.00415112	0.00161692	-4.28115e-05	0	5.06423e-13	0.00449144	0.00944274	0.325361	0	1.44927e-11	0.0237273	0.0793755	0.537462
AT1G47500	-0.0856908	-0.0117525	0.914519	-0.0376311	-0.000394198	-0.00105202	6.64363e-06	0	0.0149432	0.842055	0.21234	0.910259	0	0.065058	0.929029	0.526949	0.960406
AT1G47530	0.00127679	-0.0503161	0.829157	0.0237103	0.00419848	-0.000589657	-7.33405e-05	0	0.0798246	0.0153337	0.424561	0.155214	0	0.234336	0.0618718	0.725168	0.344895
AT1G47550	-0.0548787	-0.0135845	0.942833	-0.13081	0.00356121	0.00353064	-9.4062e-05	0	1.8136e-58	0.000602779	1.51321e-15	0.00235867	0	3.79001e-56	0.00464055	2.77503e-13	0.0155846
AT1G47570	0.300696	-0.00461585	0.382488	0.210672	0.00704028	0.00782429	-0.000420188	1.77021e-11	0.00030626	0.345725	0.0139875	0.0589267	1.92324e-11	0.00238067	0.561787	0.105535	0.181279
AT1G47578	-0.0609981	-0.0861449	0.663028	-0.0316267	0.00786776	0.000794545	-0.000206541	1.96966e-66	0.408266	0.106156	0.700246	0.148278	2.43759e-66	0.660444	0.259376	0.895347	0.333272
AT1G47600	-0.100235	0.000100771	0.982829	-0.0425034	0.00266475	-0.00291257	-8.85624e-05	0	0.0424252	0.320016	0.0108024	0.267342	0	0.149036	0.537901	0.0876877	0.481339
AT1G47640	-0.00141511	-0.00487738	0.986331	0.00294311	0.00062474	-0.000121505	-1.26259e-05	0	0.350349	0.121265	0.479723	0.293265	0	0.605779	0.28444	0.763784	0.508349
AT1G47670	-0.00615852	-0.00434333	0.992394	0.00277416	0.000191071	-9.88705e-05	-6.06773e-06	0	0.404271	0.653447	0.585854	0.632277	0	0.658113	0.813617	0.830754	0.795731
AT1G47720	-0.203602	0.144251	0.567671	-0.23433	0.00383358	0.00103138	-0.000474304	2.35771e-44	1.89481e-08	0.472267	0.65017	0.00283832	2.80912e-44	3.15986e-07	0.675118	0.871613	0.0181216
AT1G47740	0.000307243	-0.000544008	0.997738	-0.000881293	0.000175448	0.000118903	-7.8444e-06	0	0.552847	0.355746	0.142162	0.165814	0	0.776031	0.571509	0.436688	0.358951
AT1G47840	0.000477121	-0.000806511	0.994436	0.00386047	0.000448524	-0.000142041	-1.67657e-05	0	0.290462	0.337075	0.475873	0.228473	0	0.54439	0.553942	0.760568	0.436635
AT1G47870	-0.0548591	0.0187707	0.99202	-0.0661671	-0.0027687	-0.000161938	7.3307e-05	0	3.39919e-05	0.175219	0.852485	0.228345	0	0.000343204	0.365236	0.962607	0.436483
AT1G47960	-0.0039159	-0.00104364	0.00492749	-0.00153759	0.000154136	-3.45788e-05	-6.2832e-06	0.036216	0.524076	0.617666	0.792843	0.494663	0.0376184	0.754974	0.785945	0.939411	0.689261
AT1G48000	0.0319146	-0.0137503	0.927071	-0.0309536	0.00367835	0.00144149	-5.39102e-05	2.70395e-138	0.415242	0.449224	0.486769	0.709733	3.69041e-138	0.666553	0.657189	0.768301	0.849239
AT1G48050	-0.0010729	0.0224173	0.039302	0.0065424	-0.00357093	-0.000287579	9.56997e-05	1.82013e-08	0.361106	9.77675e-05	0.461828	0.000457801	1.96017e-08	0.617448	0.000980512	0.753038	0.00398238
AT1G48110	0.00712767	0.00594123	0.993189	0.00463247	-7.80302e-05	-0.000397972	-1.42018e-06	0	0.623924	0.948532	0.44006	0.968548	0	0.824168	0.984808	0.737366	0.991539
AT1G48120	0.00689801	-0.0955001	0.838478	0.0878811	0.0131448	-0.00576327	-0.000270431	5.98511e-68	0.0751268	0.0384797	0.0351955	0.153421	7.43053e-68	0.224955	0.124291	0.193407	0.342264
AT1G48160	0.00105694	-0.0104411	0.974668	0.00183502	0.000259343	2.55777e-05	1.1358e-05	0	0.44604	0.399914	0.845628	0.215982	0	0.695732	0.612829	0.960671	0.422559
AT1G48170	0.0097165	0.00521285	0.991724	-0.00311495	-7.7602e-05	0.000620009	-8.35839e-06	0	0.593291	0.917174	0.0513463	0.706969	0	0.80447	0.968589	0.244514	0.848514
AT1G48175	-0.0490076	-0.0837987	0.110422	0.00798256	0.00781605	0.0012602	-0.00020455	0.321616	0.944319	0.592992	0.839832	0.638732	0.330102	0.986655	0.767925	0.958193	0.799617
AT1G48210	-0.00211237	-0.000116738	0.989659	-0.000383077	0.000232833	-5.29037e-05	-7.27525e-06	0	0.868489	0.43152	0.675103	0.409429	0	0.954764	0.640649	0.881448	0.619382
AT1G48230	-0.025203	-0.0384235	0.885269	-0.0136365	0.00326331	-2.85125e-05	-5.36843e-05	0	0.21323	0.0199012	0.96195	0.198634	0	0.445775	0.0756801	0.998762	0.401336
AT1G48240	0.00216117	-0.0040995	0.977883	-0.00593276	0.00115802	0.000609968	-4.4836e-05	0	0.258609	0.0848015	0.0332537	0.0251198	0	0.505957	0.221519	0.186412	0.0972819
AT1G48260	0.00793807	-0.0922219	0.825839	0.0990755	0.00720955	-0.00404972	-8.39571e-05	0	1.7236e-06	0.00651618	0.000338406	0.287639	0	2.14816e-05	0.0321551	0.0058367	0.502767
AT1G48310	0.0716243	-0.175568	0.549365	0.0291047	0.021779	0.00165644	-0.00042299	9.26471e-21	0.62942	0.00476832	0.614678	0.0658177	1.03884e-20	0.828107	0.0247964	0.848322	0.195452
AT1G48350	0.00225391	-0.00204528	0.984326	0.00591564	0.000220315	-0.000167392	-4.33501e-06	0	1.33525e-10	0.0615235	0.000863623	0.216935	0	2.91936e-09	0.17564	0.0124367	0.423679
AT1G48360	-0.19334	-0.115107	0.447702	-0.349886	0.0323373	0.00493039	-0.00103807	6.43906e-26	1.05877e-15	6.89857e-09	0.0383095	4.32948e-10	7.32793e-26	3.83633e-14	1.80731e-07	0.203561	1.63465e-08
AT1G48390	-0.0347453	-0.155997	0.659695	-0.099979	0.0201959	0.00468345	-0.000364201	1.23534e-23	0.108821	0.00903058	0.138139	0.0994209	1.39755e-23	0.290771	0.0413392	0.431183	0.258581
AT1G48420	0.00447356	-0.0167329	0.964154	0.0120397	0.000919401	-0.000120877	-8.45329e-06	0	0.0141717	0.143181	0.651691	0.651431	0	0.0624861	0.318078	0.872469	0.809485
AT1G48430	0.0195229	-0.155125	0.64548	0.063682	0.00646023	-0.00256232	0.000109855	9.28825e-209	0.00302486	0.0187174	0.0287456	0.179658	1.37096e-208	0.0174128	0.0721554	0.168829	0.377463
AT1G48450	-0.0383777	0.0145607	0.982727	-0.00998185	0.000116317	-0.00130835	-3.85515e-05	0	0.0867622	0.876038	3.87155e-05	0.0827027	0	0.247979	0.947873	0.000925259	0.228105
AT1G48460	-0.0371217	0.0276846	0.579635	-0.0111333	-0.00701478	-0.000474567	0.000214868	2.82975e-38	0.808634	0.232983	0.849909	0.220149	3.32786e-38	0.926598	0.439976	0.961875	0.426073
AT1G48490	-0.0426601	0.00506609	0.986067	-0.0957081	-0.000557643	0.00255775	-1.21673e-06	0	3.5278e-32	0.590741	7.26854e-09	0.968587	0	2.93526e-30	0.766667	4.7286e-07	0.991539
AT1G48500	-0.00326508	-0.0271158	0.920729	-0.00114192	0.00224184	6.2122e-05	-1.86023e-05	0	0.931205	0.185277	0.931398	0.712196	0	0.982368	0.378129	0.988957	0.850655
AT1G48520	0.0235371	-0.0272153	0.920732	0.0407355	0.00361009	-0.00048962	-9.12951e-05	0	1.89249e-13	3.47849e-07	0.105078	1.52703e-05	0	5.6311e-12	6.73657e-06	0.369968	0.000214741
AT1G48540	-0.0188935	-0.0213246	0.880238	-0.0427097	0.00828879	0.00102902	-0.000307197	0	0.0384951	0.00169373	0.360724	9.42987e-05	0	0.138312	0.0108635	0.678983	0.00104356
AT1G48550	0.10343	0.147514	0.774459	-0.0254172	-0.011037	0.00485888	0.000117705	2.09359e-163	0.383492	0.00309854	0.00225991	0.289751	2.94737e-163	0.636862	0.0175779	0.0271059	0.504007
AT1G48580	-0.0203767	-0.0721905	0.881103	-0.0455483	0.00536052	0.00224198	-6.01084e-05	4.36576e-213	0.175879	0.180686	0.401625	0.69001	6.46838e-213	0.395738	0.372395	0.706486	0.836323
AT1G48610	-0.0112427	0.00813171	0.988413	0.00791771	-0.00108758	-0.00104027	2.83618e-05	0	0.335578	0.301214	0.0203911	0.365554	0	0.590003	0.518326	0.134632	0.577002
AT1G48635	-0.0109878	-0.00705247	0.966682	0.00359278	4.64122e-05	-0.000606752	1.74502e-05	0	0.622159	0.960316	0.127133	0.53009	0	0.823254	0.990291	0.411681	0.717091
AT1G48650	-0.0173725	0.000645586	1.00131	-0.00573762	-0.000359467	-0.000424003	1.07697e-05	0	0.0588469	0.354875	0.0104892	0.352225	0	0.188789	0.570568	0.0858437	0.564289
AT1G48790	-0.0133965	-0.00240673	0.977114	0.00294504	0.000601953	-0.000830196	-1.8123e-05	0	0.573552	0.368568	0.00363429	0.363587	0	0.790238	0.582076	0.0386739	0.57511
AT1G48840	-0.00684154	0.00915751	0.841757	0.080251	0.00338563	-0.00382275	-0.000174345	1.13172e-146	0.0165418	0.429346	0.0363722	0.171976	1.55975e-146	0.070682	0.639295	0.197726	0.36716
AT1G48850	0	0	1.00002	-3.23485e-05	-4.49285e-06	8.9857e-07	1.40402e-07	0	0.388461	0.349168	0.660576	0.32615	0	0.640732	0.564739	0.875236	0.537462
AT1G48860	-0.00214812	0.00806693	0.971404	0.00261138	0.000585889	-5.58672e-05	-4.43996e-05	0	0.654759	0.432954	0.8608	0.046111	0	0.844128	0.642319	0.964459	0.152617
AT1G48880	-0.0546394	-0.016756	0.954523	-0.0405319	0.0032319	0.000105585	-9.55628e-05	7.84202e-257	0.143281	0.359334	0.943671	0.355603	1.20438e-256	0.345089	0.574244	0.991176	0.567979
AT1G48960	-0.00420016	0.00361171	0.922785	-0.0349811	-0.000650406	0.00145483	1.48623e-05	0	0.00833207	0.701414	0.0442949	0.768724	0	0.0404933	0.842667	0.224364	0.883344
AT1G48970	-0.122695	-0.0458491	0.696739	-0.114086	0.0161995	0.00162674	-0.000597611	1.79305e-191	2.46484e-06	1.70943e-07	0.218203	9.57848e-11	2.59961e-191	3.01758e-05	3.46748e-06	0.534615	4.06001e-09
AT1G49040	-0.0164748	-0.0393383	0.799867	-0.00214288	0.00387906	-0.000216899	-6.95735e-05	3.43897e-229	0.932734	0.232386	0.875557	0.472217	5.17371e-229	0.982652	0.439163	0.969413	0.670018
AT1G49050	-0.000789186	0.0374034	0.927086	0.00174415	-0.00450214	-0.000855127	0.000123304	3.46655e-248	0.9508	0.213176	0.57922	0.252507	5.29319e-248	0.989804	0.414274	0.826906	0.46525
AT1G49130	0.131947	-0.128986	0.300655	0.193813	0.00125447	-0.00319273	0.000221959	2.1418e-25	6.00073e-11	0.740609	0.0481618	0.0493163	2.43377e-25	1.37208e-09	0.870177	0.236752	0.160015
AT1G49160	-0.0482301	0.0691052	0.897497	0.0105173	0.0134646	-0.00123459	-0.000800398	5.29946e-204	0.727745	0.000494939	0.453815	3.65827e-12	7.77611e-204	0.88186	0.00393586	0.747979	2.05458e-10
AT1G49180	0	0.0166493	0.0234399	-0.0156634	-0.00130876	0.000584498	1.57281e-05	0.000212515	0.0158461	0.115142	0.0989122	0.525134	0.000224692	0.068196	0.275323	0.358397	0.714003
AT1G49240	-0.00111196	-0.000265945	0.999419	-0.000373062	4.13081e-05	-5.43651e-05	-1.68536e-06	0	0.487077	0.547535	0.063397	0.410176	0	0.72766	0.733366	0.277084	0.620181
AT1G49340	0.04037	-0.00998077	0.862922	0.0289601	-0.00213135	-0.000324215	0.000106644	0	0.140174	0.396133	0.762106	0.154167	0	0.340618	0.609226	0.924383	0.343078
AT1G49350	-0.343088	0.073262	0.560265	-0.358729	0.00101408	0.00157533	-0.0002253	9.78154e-30	1.56458e-12	0.87589	0.569358	0.244193	1.1253e-29	4.2604e-11	0.947873	0.821096	0.456199
AT1G49360	0.0294376	-0.11327	0.483743	0.0466062	0.00359273	-0.0028854	0.000175272	2.02107e-36	0.236561	0.47575	0.179202	0.242941	2.36291e-36	0.474812	0.678492	0.48314	0.454807
AT1G49380	-0.0743595	-0.0072798	0.98863	-0.0276003	-0.000635517	-0.000950615	1.92845e-05	0	0.0197491	0.674831	0.141103	0.669194	0	0.0811454	0.828134	0.434985	0.823402
AT1G49400	-0.00215419	-0.00912118	0.977979	0.0020556	0.000537226	-0.000144349	-3.16305e-06	0	0.526024	0.195231	0.414388	0.797991	0	0.755933	0.391421	0.716921	0.89957
AT1G49410	0.00440083	-0.000637944	0.00765446	0.00893422	-0.000761783	-0.000358443	3.84659e-05	0.00191284	0.0004142	0.0186166	0.0094136	6.66834e-05	0.00200991	0.00311986	0.0718593	0.0792847	0.000781248
AT1G49430	-0.000680861	-0.00872311	0.982709	0.00510706	0.000758909	-0.000185775	-1.04191e-05	0	0.105939	0.0604131	0.281033	0.386916	0	0.285301	0.173251	0.603432	0.599556
AT1G49510	0.00490073	0.0031373	0.992568	-0.000901502	2.96082e-05	0.000226698	-4.10242e-06	0	0.699808	0.921154	0.0755171	0.645315	0	0.867496	0.971287	0.307022	0.804894
AT1G49520	-0.00538585	0.0432341	1.00661	-0.00411684	-0.00466784	0.000410664	6.57949e-05	0	0.805054	0.0287214	0.651779	0.300793	0	0.924618	0.0996347	0.872469	0.515826
AT1G49560	0.0014449	-0.00662341	0.981512	-0.000363782	0.00139796	6.02051e-05	-3.35873e-05	0	0.940548	0.0250832	0.821006	0.0708659	0	0.985973	0.090123	0.94994	0.205486
AT1G49580	-0.0145565	-0.0083906	0.95047	0.0106241	0.000465974	-0.0011665	7.97149e-06	0	0.23354	0.682986	0.0165016	0.814614	0	0.470431	0.833387	0.117035	0.909558
AT1G49590	0.0281332	0.0636771	0.631068	-0.0183503	-0.0147184	0.000109016	0.000513992	2.66758e-64	0.631306	0.00262562	0.958323	0.000421812	3.28954e-64	0.829132	0.015437	0.998547	0.00371256
AT1G49620	-0.0112035	0.0240056	0.911082	-0.0434228	0.00209082	0.000747028	-0.000116707	1.32487e-117	0.281652	0.688307	0.734772	0.452792	1.7614e-117	0.532715	0.836166	0.913231	0.65486
AT1G49630	-0.0342159	0.0292923	0.866859	0.0137106	0.000749646	-0.00342491	-4.91235e-06	4.56408e-87	0.760422	0.89632	0.162644	0.977136	5.83813e-87	0.899537	0.956627	0.467542	0.995753
AT1G49670	0.0219803	0.0398657	0.964859	-0.0122207	0.00746754	0.00143569	-0.000419214	0	0.202655	1.1663e-09	0.00607789	1.99107e-30	0	0.432761	3.57692e-08	0.0574904	1.11824e-27
AT1G49700	-0.00273555	-0.00652378	-0.00242364	0.00305047	0.00027754	-0.000375686	7.50459e-06	0.722642	0.663237	0.75682	0.325596	0.778698	0.734079	0.848806	0.879564	0.648126	0.889121
AT1G49710	0.382812	-0.00265625	0.541646	0.319022	0.00527525	0.00313647	-0.000210649	3.07914e-102	6.61557e-35	0.111165	0.0263369	0.0327715	4.0246e-102	6.25763e-33	0.268096	0.159691	0.118553
AT1G49730	-0.0207889	0.0419073	0.621838	0.0185683	-0.0216176	-0.000706498	0.000746375	6.26142e-110	0.516733	3.63262e-09	0.651115	8.09616e-12	8.24881e-110	0.749412	1.01691e-07	0.87223	4.15726e-10
AT1G49840	-0.0955943	0.0193376	0.642848	-0.0191672	0.0134514	-0.00436373	-0.000631614	3.08984e-26	0.758102	0.0911602	0.198711	0.00776324	3.51815e-26	0.897727	0.233314	0.511198	0.0396609
AT1G49850	0.0147424	-0.0147524	0.87913	0.039867	0.000773794	-0.00112747	9.95823e-06	0	0.000964902	0.616573	0.0870812	0.828779	0	0.00652416	0.785	0.333359	0.918018
AT1G49860	-0.00328779	-0.00157135	0.941744	-0.0557227	0.00153057	0.00247046	-7.44657e-05	8.20477e-167	0.125132	0.745305	0.266559	0.608127	1.15979e-166	0.316209	0.873213	0.588238	0.777587
AT1G49870	-0.249357	-0.217913	0.628999	-0.0312096	-0.00379242	-0.00421779	0.000515083	7.30689e-17	0.690341	0.715742	0.391793	0.115712	8.10914e-17	0.861816	0.853005	0.699751	0.286706
AT1G49880	-0.00304338	0.00249338	0.959502	-0.00474784	0.00110097	-0.000556167	-3.929e-05	0	0.803604	0.652184	0.593353	0.589303	0	0.923462	0.812608	0.835193	0.763227
AT1G49975	-0.231331	0.145418	0.864895	-0.227152	-0.00819921	0.000262649	-1.88253e-05	0	1.89926e-28	0.00180157	0.814616	0.809937	0	1.37635e-26	0.0113926	0.948082	0.907016
AT1G49980	-0.107503	-0.167628	0.688925	-0.0465076	0.0193409	-0.0018608	-0.000394335	4.70683e-55	0.30378	0.000829901	0.450725	0.0221788	5.71331e-55	0.556414	0.00604335	0.745681	0.0884528
AT1G50000	0.101266	0.0537981	0.404291	0.111903	-0.000600091	0.00108128	-0.000128861	8.15422e-08	0.147863	0.951634	0.797709	0.662009	8.75329e-08	0.352751	0.986666	0.941236	0.817707
AT1G50030	-0.000548827	-0.00189204	0.997554	0.00147693	4.91398e-05	-6.89744e-05	1.11702e-06	0	0.316738	0.794586	0.391412	0.842551	0	0.569583	0.90051	0.699751	0.92424
AT1G50110	-0.0084538	0	0.993303	0.00935526	0.0012177	-0.00115331	-3.80531e-05	0	0.518919	0.511691	0.144961	0.491305	0	0.750267	0.705548	0.440683	0.686711
AT1G50120	-0.0627778	0.00961015	0.963648	-0.0448272	0.000820316	-0.0010333	-3.89965e-05	0	0.00067398	0.626758	0.150841	0.437824	0	0.00476506	0.793047	0.449868	0.642698
AT1G50140	0.0733419	0.0851678	0.928598	-0.000397764	-0.00163136	0.00608009	-0.000246699	0	0.986819	0.59639	3.67386e-06	0.00719051	0	1	0.769995	0.000125051	0.0374744
AT1G50170	-0.0125834	0.00204942	0.898452	-0.0658035	0.00197052	0.00260827	-8.70082e-05	0	4.43123e-08	0.200219	6.99988e-05	0.0576645	0	7.09786e-07	0.397958	0.00153417	0.178742
AT1G50200	-0.000218471	-5.36788e-05	0.999958	0.000130498	-2.45594e-05	-7.66865e-06	9.7651e-07	0	0.415677	0.231197	0.38062	0.110105	0	0.666894	0.437683	0.691881	0.276989
AT1G50240	0.00207293	-0.0367984	0.918969	-0.0290509	0.008916	0.00119472	-0.00023307	0	0.213264	0.00324129	0.357032	0.00994417	0	0.445775	0.0182381	0.67714	0.0481976
AT1G50260	-0.0255677	-0.00431857	0.956749	-0.0186134	-0.000631579	-0.000823009	3.74008e-05	0	0.295538	0.781455	0.39654	0.58138	0	0.549999	0.894001	0.702823	0.757477
AT1G50280	0.163965	-0.0045592	-0.00480642	0.00925184	0.000972331	0.0101355	-2.86044e-05	0.955961	0.917469	0.932521	0.0405121	0.933445	0.966719	0.978533	0.97616	0.209943	0.973764
AT1G50300	0.136423	0.0798942	0.610013	0.0905225	-0.00542051	0.0012877	8.59316e-05	2.15878e-61	0.0167878	0.263052	0.532929	0.551521	2.64794e-61	0.0714614	0.476823	0.801088	0.733131
AT1G50360	-0.332807	0.0186677	0.883795	-0.261936	0.0146691	-0.00457558	-0.000571897	5.60352e-103	4.81789e-10	0.00643459	0.0462378	0.0003635	7.33264e-103	9.75081e-09	0.0318224	0.230829	0.00330944
AT1G50380	-0.00415429	-0.017564	0.966298	0.00211633	0.000919584	8.53433e-05	-1.24686e-05	0	0.793633	0.374306	0.84667	0.685994	0	0.917158	0.587098	0.960907	0.834285
AT1G50410	-0.0175753	0.039951	0.607782	-0.032911	-0.00778131	0.00164137	0.000229358	1.43891e-158	0.15673	0.00886936	0.195446	0.00962766	2.01184e-158	0.366764	0.0407673	0.504582	0.0470585
AT1G50440	0.00541389	-0.0275139	0.807775	0.0557934	0.000471895	-0.00220122	8.48096e-05	3.29708e-121	0.114981	0.917012	0.254336	0.529675	4.40231e-121	0.30097	0.968589	0.576105	0.717091
AT1G50450	-0.0295937	0.0616367	0.91749	0.00105103	0.00238668	-0.00162542	-0.000251659	0	0.927422	0.105939	0.00981798	1.05686e-08	0	0.981373	0.259141	0.0817649	3.19763e-07
AT1G50460	-0.00200193	0.0181212	0.915161	-0.018627	0.00118891	0.000920371	-7.64905e-05	0	0.257907	0.572478	0.305515	0.222958	0	0.504949	0.752419	0.627878	0.429843
AT1G50480	-0.0496127	-0.0138454	0.962195	-0.176955	0.00182589	0.00547339	-3.57285e-05	0	3.81257e-125	0.0549841	1.77126e-41	0.207574	0	3.11452e-122	0.161808	1.59165e-37	0.411757
AT1G50500	-0.146547	-0.0450118	0.810834	-0.0703636	0.00492631	-0.00317522	-0.000113222	1.083e-128	0.0411997	0.263927	0.0912808	0.388837	1.46013e-128	0.145641	0.477481	0.342056	0.601496
AT1G50510	-0.141966	0.00288565	0.997934	-0.112255	-0.000696891	-0.00172575	7.81699e-06	0	1.18396e-07	0.797197	0.135592	0.922932	0	1.7384e-06	0.902598	0.42677	0.968976
AT1G50575	0.0195156	-0.00155604	0.965573	0.0192846	0.000793169	-0.000435145	-1.5157e-05	0	0.0550316	0.537377	0.427448	0.69242	0	0.179823	0.724394	0.726782	0.838443
AT1G50620	0.00901777	-0.0297661	0.914673	0.00557867	0.00503699	-6.49029e-05	-0.000124325	0	0.726442	0.013548	0.940525	0.0408244	0	0.881089	0.0564668	0.990714	0.139592
AT1G50670	-0.00430074	0.00553637	0.985862	0.000280224	0.000247031	0.000101403	-3.39381e-05	0	0.945246	0.636065	0.648716	0.0291172	0	0.987241	0.800404	0.870314	0.108364
AT1G50710	-0.0821403	-0.0055898	1.00411	-0.0690724	-0.00278405	0.000226966	9.39653e-05	0	1.07573e-06	0.124412	0.768936	0.0817718	0	1.37699e-05	0.289111	0.927596	0.226581
AT1G50730	0.106851	-0.00761296	0.652863	0.122611	0.00495799	-0.00134007	-0.000162432	3.9215e-105	6.70809e-05	0.207696	0.424503	0.165948	5.14432e-105	0.000625949	0.407194	0.725168	0.358982
AT1G50840	-0.00198624	0.011075	0.995971	0.00452985	-0.00161852	-0.000157734	4.60964e-05	0	0.469322	0.0433063	0.64419	0.0534149	0	0.715771	0.135502	0.867544	0.16889
AT1G50910	-0.00743622	-0.00270194	0.914746	-0.026809	0.00391712	0.000764033	-0.000120937	0	0.152528	0.107186	0.463157	0.0957052	0	0.361087	0.261094	0.754023	0.251906
AT1G50930	0.0399838	0.0303416	0.936107	-0.0185182	0.00608352	-0.000766464	-0.000248002	4.06026e-39	0.7998	0.51911	0.847743	0.3782	4.78059e-39	0.921528	0.711845	0.960952	0.589908
AT1G50950	0.0915487	-0.145952	0.437784	-0.0163938	0.000894114	0.00429382	0.000491016	0.00397205	0.907557	0.959311	0.558137	0.320204	0.00416486	0.974117	0.989769	0.814324	0.533435
AT1G50970	-0.001803	-0.000945708	0.000805607	-0.000420134	-6.16788e-05	-3.31084e-05	4.06962e-06	0.536339	0.753262	0.718329	0.64978	0.424445	0.546681	0.895835	0.855294	0.871351	0.631571
AT1G51070	-0.000493381	-0.00103832	0.99718	-0.000439996	7.05413e-05	8.65172e-07	-1.14325e-07	0	0.489113	0.386057	0.980109	0.962396	0	0.72961	0.599155	1	0.989214
AT1G51110	-0.0415663	0.0132932	0.885332	-0.133778	0.0060676	0.004737	-0.000299401	0	1.7437e-13	0.00901034	1.73794e-06	1.52442e-05	0	5.20562e-12	0.0412886	6.50714e-05	0.000214709
AT1G51130	0.00328239	-0.0314921	0.940222	-0.0100704	0.00372766	0.000452253	-7.18365e-05	0	0.260162	0.00112288	0.353962	0.0351124	0	0.507009	0.00777968	0.67402	0.124909
AT1G51160	-0.00531354	-0.00691781	0.985454	0.00641904	-6.32778e-05	-0.000343778	1.45269e-05	0	0.0351069	0.871028	0.0385875	0.210965	0	0.129027	0.945745	0.204288	0.41637
AT1G51270	0.000913539	0.0041821	0.00927788	-0.00623979	-0.00107879	0.000538753	2.89679e-05	0.114804	0.301228	0.162415	0.101804	0.208036	0.118564	0.554283	0.347408	0.36448	0.412219
AT1G51310	-0.0522068	0.0438361	0.864016	-0.0389066	-0.0100793	0.000145176	0.000270127	1.07555e-241	0.145046	0.00317028	0.920604	0.0079523	1.63618e-241	0.347941	0.0179396	0.985406	0.040464
AT1G51340	0.0418995	-0.147618	0.72111	0.131279	0.0149124	-0.00161248	-0.000350443	2.51661e-45	0.0117263	0.0267318	0.571238	0.0808859	3.00363e-45	0.0538165	0.0945545	0.822355	0.225028
AT1G51350	0.00625899	0.00316452	0.981214	0.00805204	0.000195564	-4.36908e-06	-2.73468e-05	0	0.319026	0.849966	0.992092	0.374669	0	0.572438	0.932348	1	0.586751
AT1G51370	-0.0364087	-0.0441552	0.903565	-0.219524	0.00847457	0.00899315	-0.000254225	7.36828e-152	5.0912e-10	0.0607028	3.04186e-06	0.0589694	1.0221e-151	1.02348e-08	0.17394	0.000107193	0.181321
AT1G51380	0.0337643	-0.00329675	0.652067	-0.018481	0.00895377	0.00571916	-0.000404559	3.82936e-19	0.809106	0.370476	0.231232	0.195064	4.27461e-19	0.926785	0.583847	0.547811	0.396879
AT1G51405	0.0465007	0.00236856	0.935984	-0.000208186	-0.000294006	0.00047109	7.52214e-05	1.53064e-85	0.996592	0.962766	0.859663	0.688824	1.95513e-85	1	0.991226	0.96429	0.835439
AT1G51420	0.000537365	-0.00526876	0.978091	-0.000310964	0.000791269	0.000101413	-1.40109e-05	0	0.951217	0.223702	0.714572	0.46963	0	0.989997	0.428793	0.902012	0.667209
AT1G51430	0	0	0.000682537	0.00168773	-0.000124098	-7.44585e-05	3.87805e-06	0.483003	0.0908779	0.331194	0.171525	0.308136	0.492931	0.255916	0.546576	0.473525	0.520864
AT1G51470	-0.137057	0.00120547	0.971712	-0.0193607	0.00482489	-0.00679495	-0.000164254	3.02078e-204	0.553679	0.248653	0.00013887	0.18748	4.43542e-204	0.776715	0.45928	0.0027187	0.387822
AT1G51500	0.000527065	0.000527065	1.00016	-0.000101108	-3.04255e-05	2.02449e-05	3.18145e-07	0	0.688481	0.345698	0.141161	0.740701	0	0.860457	0.561787	0.435004	0.868808
AT1G51510	0.00925516	-0.0515407	0.901134	0.0161797	0.00658908	-0.000218171	-0.000142067	0	0.00569508	1.36118e-18	0.494365	1.91099e-10	0	0.0293946	1.69882e-16	0.772454	7.66613e-09
AT1G51520	0	0						1	1	1	1	1	1	1	1	1	1
AT1G51560	-0.000544243	-0.00280629	0.994952	-0.00798099	4.5073e-05	0.000306407	2.09016e-06	0	0.0573553	0.93314	0.181053	0.896115	0	0.185127	0.976486	0.485364	0.953144
AT1G51590	-0.0231187	0.00191623	0.929145	-0.0213196	0.00556695	-0.000529688	-0.000228491	0	0.0857361	0.000453216	0.433885	1.35895e-06	0	0.245671	0.00366319	0.732171	2.45705e-05
AT1G51610	-0.0385197	0.000519574	0.887582	-0.0782007	0.00695305	0.00193388	-0.000243943	0	0.000539074	0.0161767	0.116723	0.00462919	0	0.00391908	0.0645776	0.393425	0.0266935
AT1G51620	-0.0140458	-0.0310851	0.802126	-0.0117481	0.00219444	-0.00195493	1.7597e-05	3.12704e-126	0.732956	0.618389	0.298004	0.893353	4.20338e-126	0.884584	0.786309	0.621171	0.95171
AT1G51680	-0.0205627	0.0015913	0.980385	-0.0136916	-0.000278384	-0.000174847	1.10445e-05	0	0.0096673	0.680921	0.544716	0.584015	0	0.0460432	0.832045	0.809707	0.758757
AT1G51690	0.00151377	0.00371162	0.993073	-5.57472e-05	-0.000506971	-2.73347e-06	1.45021e-05	0	0.976585	0.0369535	0.978954	0.0451839	0	1	0.1204	1	0.150658
AT1G51720	-0.0268223	0.234402	0.945183	-0.0346662	-0.00731441	-0.00144589	-0.000183114	6.05603e-287	0.195601	0.0328173	0.322441	0.07293	9.49233e-287	0.423025	0.109999	0.645348	0.20998
AT1G51740	-0.0845885	-0.0512634	0.742717	-0.0915237	-0.00719874	0.00168907	0.000359724	1.2919e-141	0.00234031	0.0613591	0.30325	0.00170288	1.7721e-141	0.0140952	0.175373	0.625641	0.0118898
AT1G51745	0.000401106	0.000401106	0.999425	0.000631178	-0.000236686	1.59221e-05	8.39054e-06	0	0.820516	0.506063	0.916447	0.428842	0	0.932913	0.700773	0.985406	0.636094
AT1G51790	-0.0161517	-0.0823019	0.822412	-0.110262	0.0095313	0.00425796	-0.000168371	0	9.66152e-11	1.22651e-05	4.62011e-06	0.00952739	0	2.1543e-09	0.0001579	0.000149339	0.0466811
AT1G51805	0.021123	0.133509	0.66682	0.000941781	0.00136977	-0.00265357	-0.000225497	4.58666e-54	0.982995	0.808549	0.270976	0.180662	5.55917e-54	1	0.908884	0.593465	0.379088
AT1G51820	0.0118437	0.0150429	1.00306	0.0054349	-0.00159312	-9.02047e-05	4.79215e-05	0	0.43448	0.0733566	0.812057	0.0706513	0	0.685608	0.199873	0.946974	0.205062
AT1G51840	-0.424303	-0.0171979	0.74414	-0.212826	0.0148596	-0.0101963	-0.000542555	6.36745e-98	4.77535e-09	0.00139782	2.72374e-07	9.02811e-05	8.26848e-98	8.58226e-08	0.00926315	1.28144e-05	0.00100778
AT1G51890	-0.0412971	0.0232547	0.899106	-0.0225339	0.00277324	-0.001437	-0.000124394	6.58108e-208	0.452226	0.469627	0.379563	0.276351	9.70105e-208	0.699991	0.673057	0.691276	0.490092
AT1G51940	0.0233279	0.0590991	0.944437	0.00259067	-0.000723945	0.000770177	-0.000114688	0	0.860486	0.70107	0.338182	0.041247	0	0.951086	0.842667	0.660191	0.140769
AT1G51950	-0.018849	0.00749893	0.965474	0.00354652	0.00224251	-0.000568191	-0.000130313	0	0.596135	0.00881376	0.119623	3.25209e-07	0	0.80633	0.0405325	0.397386	6.87606e-06
AT1G51965	0.0327493	0.0482535	0.208878	0.0100911	-0.00141557	-2.11552e-05	-1.64552e-05	2.60513e-11	0.753541	0.730658	0.990373	0.893161	2.82931e-11	0.896033	0.862886	1	0.951618
AT1G52000	-0.0348343	0.0397792	0.969153	0.00164083	-0.00313906	-0.0020077	7.24387e-05	0	0.942823	0.27322	0.0958604	0.396653	0	0.986655	0.487618	0.353228	0.608161
AT1G52070	0.00175275	9.79787e-05	0.997311	-0.00237929	0.000267043	0.000126105	-7.52512e-06	0	0.195137	0.255747	0.208159	0.28244	0	0.422486	0.468434	0.522928	0.497271
AT1G52100	0.000182932	-0.00376319	0.952247	-0.00200339	-0.000279624	5.22174e-05	2.10589e-05	0	0.848474	0.834885	0.927265	0.598297	0	0.94663	0.924106	0.987954	0.771127
AT1G52155	-0.0135302	-0.00636213	0.933431	-0.0390698	0.00335433	0.00184141	-0.000142903	9.91117e-285	0.141238	0.323525	0.203724	0.158075	1.5516e-284	0.342186	0.541881	0.518307	0.347982
AT1G52200	-0.00770357	0.0102717	0.919502	0.00922804	-0.000160772	-0.000583581	-2.96578e-05	0	0.174445	0.853284	0.115424	0.252233	0	0.394068	0.934732	0.391101	0.464947
AT1G52220	0.0035258	0.018211	0.994842	-0.00180369	8.85808e-06	0.000251578	-4.4174e-05	0	0.483436	0.97854	0.0731806	6.72524e-06	0	0.727392	0.998955	0.301852	0.000106023
AT1G52260	-0.191132	0.0097855	0.986924	-0.166638	0.000933801	-0.00120868	-3.31083e-05	1.04197e-256	1.77323e-08	0.80513	0.453912	0.769082	1.59972e-256	2.96727e-07	0.906086	0.748001	0.883529
AT1G52290	-0.0372367	0.0571024	0.816369	0.012136	0.00169797	-0.00411701	-0.000181661	1.25151e-45	0.837221	0.822235	0.201406	0.419826	1.49529e-45	0.942016	0.917497	0.515488	0.627818
AT1G52300	-0.000768365	-0.00213241	0.995744	4.22409e-05	0.000146865	-2.50725e-05	-7.34917e-07	0	0.926882	0.0126376	0.318063	0.675345	0	0.981177	0.0536428	0.641695	0.827972
AT1G52310	-0.0505369	-0.0340169	0.763422	-0.0155021	0.0146635	-0.000935938	-0.000532333	1.72392e-134	0.625184	0.000304164	0.588758	1.07977e-05	2.34006e-134	0.824829	0.00260555	0.83232	0.000158543
AT1G52370	-0.00551804	-0.0301317	0.936731	-0.0207228	0.00438556	0.000585338	-9.3039e-05	0	0.000471767	7.32608e-09	0.070258	3.82588e-05	0	0.00351517	1.90818e-07	0.293706	0.000486272
AT1G52400	-0.000394141	0	1.00014	-1.97071e-05	-2.46338e-05	-4.92676e-06	7.69807e-07	0	0.923661	0.349168	0.660576	0.32615	0	0.979858	0.564739	0.875236	0.537462
AT1G52500	0.0465008	0.0809213	0.719819	0.0747456	-0.00857999	-0.00033071	0.000164787	4.79761e-120	0.0183717	0.034376	0.848336	0.172658	6.39635e-120	0.076847	0.114133	0.960952	0.368004
AT1G52510	-0.0241399	-0.00593377	0.952453	-0.0503813	0.00269157	0.00128837	-0.000106078	0	7.10823e-14	0.00177304	0.000449797	3.55578e-05	0	2.21787e-12	0.0112518	0.00729581	0.000455902
AT1G52540	-0.0320192	-0.0165435	0.901021	-0.0419728	0.00229274	0.000697745	-5.86738e-05	0	0.00492617	0.229944	0.391548	0.302497	0	0.025917	0.435832	0.699751	0.517957
AT1G52630	0.0274526	0.247896	0.83452	-0.044943	-0.0144946	0.00460287	-2.09499e-05	3.23479e-68	0.359546	0.0209102	0.0854231	0.910795	4.01767e-68	0.615758	0.0788496	0.330865	0.960498
AT1G52730	-0.00381286	-0.00257682	0.990842	0.00525989	1.49787e-05	-0.000347682	4.01195e-06	0	0.0313303	0.961781	0.00909432	0.666648	0	0.118292	0.990893	0.0772415	0.821291
AT1G52760	0.00287206	-0.000752335	0.97823	0.0101936	-0.000666721	-0.000302084	3.16502e-05	0	0.00691723	0.167371	0.142345	0.027823	0	0.0343416	0.354299	0.436716	0.105315
AT1G52870	-0.00050316	-0.00214595	0.992842	-0.00257581	-7.6685e-05	0.000175448	1.67965e-06	0	0.341455	0.824812	0.234938	0.870735	0	0.596369	0.918889	0.553092	0.940253
AT1G52910	-0.033135	-0.00714763	0.958095	-0.0799427	-5.53187e-05	0.00210267	4.71746e-06	0	8.81583e-13	0.969162	0.000568606	0.911896	0	2.48336e-11	0.994052	0.00882468	0.961321
AT1G53025	0.0459454	0.0274102	0.569847	0.0584181	0.00350604	-0.000697629	-0.000181326	1.07478e-28	0.266752	0.602394	0.807924	0.365856	1.23314e-28	0.514826	0.774075	0.945144	0.57712
AT1G53035	-0.130928	0.0667082	0.397193	0.0605277	0.00717795	-0.00342476	-0.000589543	1.0365e-05	0.512479	0.543781	0.496934	0.0942291	1.10264e-05	0.746723	0.730079	0.774311	0.249743
AT1G53040	-0.0262737	-0.0168782	0.973902	-0.0364117	0.000799874	0.000809541	2.67939e-06	0	4.58032e-06	0.431327	0.0617896	0.929503	0	5.3732e-05	0.640649	0.272498	0.972127
AT1G53090	-0.0832035	0.0622394	0.966674	-0.0132129	-0.00368176	-0.00227973	5.87881e-06	1.36184e-133	0.743129	0.475387	0.299991	0.969489	1.84662e-133	0.889904	0.678429	0.623109	0.99201
AT1G53110	-0.00739766	0.0466963	0.975752	-0.0876589	0.00113597	0.0020679	-9.22042e-05	0	7.17547e-05	0.687571	0.0860038	0.273287	0	0.000661321	0.835951	0.331402	0.487059
AT1G53120	0.033568	0.0842186	1.00249	-0.0253164	-0.00510901	0.00275015	7.78049e-08	0	0.155001	0.0248902	0.00462989	0.999085	0	0.364522	0.0897164	0.0464332	1
AT1G53200	0.169259	0.112921	0.933428	0.0297558	-0.00180261	0.00502822	-0.000163269	0	0.177077	0.522737	2.90184e-05	0.0520352	0	0.397307	0.713878	0.000720329	0.165929
AT1G53240	0	-5.2965e-05	0.999866	-3.67586e-05	1.80794e-05	-7.07484e-08	-5.02914e-07	0	0.642339	0.0741959	0.986927	0.095548	0	0.83544	0.201306	1	0.251713
AT1G53250	0.126127	0.0106183	0.418366	0.207881	0.0155529	-0.00236275	-0.000711411	7.73768e-22	3.29792e-06	0.00652918	0.332517	2.97218e-05	8.70331e-22	3.96191e-05	0.0321663	0.65487	0.00038933
AT1G53280	-0.000799567	0.00776027	0.978317	-0.00173957	-0.000500263	0.000130705	4.55856e-06	0	0.777815	0.525927	0.697557	0.846202	0	0.908001	0.715948	0.894591	0.925395
AT1G53290	0.00966657	-0.000201794	0.977493	0.0199951	-0.000955272	-0.000900893	4.99052e-05	0	0.0187701	0.380187	0.052272	0.123892	0	0.0781233	0.592717	0.247232	0.299563
AT1G53300	0.00235574	-0.0236567	0.945037	-0.0160075	0.00374932	0.000144075	-8.48592e-05	0	0.238218	0.0308325	0.845716	0.100968	0	0.477285	0.105146	0.960671	0.260868
AT1G53320	-0.00141989	0.0106055	0.997627	-0.00296657	-0.00075819	0.000244877	-7.33751e-07	0	0.457339	0.137623	0.260767	0.961538	0	0.704551	0.310249	0.582187	0.9889
AT1G53330	0.0192362	-0.0273907	0.870197	0.0475889	0.0117001	-0.00344219	-0.000397095	2.68911e-55	0.450043	0.0991652	0.428746	0.119578	3.26634e-55	0.698557	0.247331	0.727409	0.291992
AT1G53340	0.015893	-0.00174125	0.921986	0.0211687	0.00386136	-0.000964233	-0.000131518	0	0.389436	0.219811	0.472397	0.160723	0	0.641517	0.423142	0.758187	0.352087
AT1G53350	-0.0730425	0.0188487	0.880494	0.0188098	-0.00199286	-0.00356435	2.73923e-05	4.65567e-76	0.700741	0.750291	0.181898	0.883277	5.85854e-76	0.8679	0.876738	0.486292	0.9467
AT1G53390	-0.459249	-0.195979	0.498856	-0.265364	0.0226206	-0.00763686	-0.000455455	7.16574e-24	1.75317e-07	0.000500597	0.00585725	0.018677	8.11076e-24	2.52468e-06	0.00397382	0.0558147	0.0785251
AT1G53400	-0.00890026	-0.114999	0.672614	-0.0241294	0.017445	0.00135093	-0.00042835	0	0.0338228	3.90999e-33	0.0294132	4.95541e-23	0	0.125436	1.75676e-30	0.171628	1.14178e-20
AT1G53430	-0.234352	-0.0836157	0.873152	-0.146247	0.00429422	-0.00215324	-5.87623e-05	3.56998e-77	0.00239889	0.485977	0.412609	0.748985	4.49927e-77	0.0144088	0.686202	0.715826	0.874188
AT1G53440	-0.594577	0.0634198	0.888283	-0.620466	-0.000776032	0.00198469	-0.000150809	0	3.77611e-289	0.722402	0.0331107	0.0205029	0	1.69661e-285	0.85787	0.186183	0.0837068
AT1G53450	-0.0397598	-0.0471435	0.932353	0.0220644	0.00155803	-0.0018859	2.03909e-05	0	0.31895	0.582287	0.118422	0.809086	0	0.572416	0.760086	0.395303	0.90655
AT1G53510	-0.0334789	0.198496	0.384749	0.00897061	-0.0189459	-0.00127794	0.000301164	7.2106e-73	0.681561	1.25629e-11	0.283942	0.000301859	9.0243e-73	0.856455	5.61641e-10	0.607212	0.00281089
AT1G53520	0.00231589	7.72096e-06	0.992316	-0.0033556	-0.000294774	0.000146801	1.35008e-05	0	0.227812	0.407639	0.333484	0.203071	0	0.462625	0.619707	0.655731	0.40732
AT1G53530	-0.0562992	0.0477415	0.966911	-0.0404094	-0.0033579	-0.000288555	1.09855e-05	0	0.106966	0.295114	0.83289	0.90848	0	0.287096	0.512299	0.955611	0.959633
AT1G53560	-0.0191405	0.0121523	0.997672	-6.83462e-05	-0.00180861	-0.000731424	4.54895e-05	0	0.989711	0.00764857	0.0114175	0.024355	0	1	0.0363844	0.0914419	0.0950711
AT1G53590	-0.198329	-0.0156799	0.868017	-0.0681345	0.0167994	-0.0095923	-0.000549829	8.64946e-93	0.117975	0.00258882	5.47494e-05	0.00093505	1.11512e-92	0.305548	0.0152846	0.00124237	0.00727477
AT1G53650	0.0449028	0.0538708	0.950583	-0.0386819	-0.000387308	0.00180214	-3.35832e-05	0	0.0299327	0.865089	0.0637418	0.621002	0	0.113924	0.94234	0.277487	0.78774
AT1G53710	-0.053016	-0.0129943	0.770063	-0.0168474	-0.00157283	-0.000305204	2.26922e-05	2.72537e-71	0.703401	0.781154	0.899392	0.892989	3.40188e-71	0.869396	0.893969	0.979551	0.951618
AT1G53720	-0.00686235	-0.0101266	0.985756	0.00277365	0.000378162	-0.000213106	1.12754e-06	0	0.584502	0.560082	0.441229	0.9535	0	0.797985	0.742972	0.738202	0.984961
AT1G53750	0.000926961	0.000839337	0.995118	0.00328895	0.000428225	-0.000284025	-1.44822e-05	0	0.503976	0.496474	0.290143	0.440186	0	0.740443	0.693612	0.614149	0.644702
AT1G53760	-0.00510313	-0.038679	0.911607	0.0182163	0.00250554	-0.000754066	-3.26506e-05	0	0.123201	0.0974855	0.242142	0.468592	0	0.313591	0.244759	0.562391	0.666366
AT1G53770	0.00421092	-0.0990437	0.837562	0.0148642	0.00914674	-0.000688392	-0.000142697	0	0.232991	9.66972e-09	0.311302	0.00266842	0	0.469536	2.46153e-07	0.634467	0.0172135
AT1G53780	2.76935e-05	-0.000118587	-8.51187e-05	1.38468e-06	1.80365e-05	3.46169e-07	-5.17319e-07	0.368857	0.988631	0.146856	0.947936	0.162567	0.377942	1	0.323998	0.993255	0.354055
AT1G53790	-0.00961995	-0.0185084	0.95621	-0.028651	0.000660022	0.0010634	1.6041e-05	0	0.105131	0.770459	0.270257	0.811885	0	0.283697	0.887158	0.592612	0.908147
AT1G53800	0.0838494	-0.0125306	0.878294	0.0622953	0.00191566	0.00118389	-5.46074e-05	0	4.24054e-12	0.0958345	0.0157896	0.111094	0	1.09814e-10	0.24163	0.114331	0.278774
AT1G53870	0.0603495	0.0592488	0.939425	0.0296942	-0.00345251	-0.000823251	6.73509e-05	1.6819e-244	0.303528	0.349775	0.601057	0.540419	2.56292e-244	0.556189	0.565301	0.840115	0.724915
AT1G53900	-0.0238324	-0.0990643	0.576756	-0.00111546	0.00853999	-0.00155795	-6.61783e-05	3.94275e-47	0.978314	0.103824	0.486484	0.672266	4.72267e-47	1	0.255677	0.768301	0.825286
AT1G53920	0.0367842	-0.0784709	0.657883	0.0852728	0.0261085	-0.00890626	-0.000794306	8.89728e-12	0.388638	0.0391066	0.0988478	0.03516	9.68047e-12	0.640882	0.125684	0.358308	0.125029
AT1G53940	-0.0373275	0.014175	0.975298	0.000702616	-0.0012961	-0.000933544	-4.11995e-06	0	0.9712	0.602686	0.379245	0.955714	0	0.99882	0.77408	0.691256	0.985956
AT1G53990	0	0	0.0150258	0.0371546	-0.00273196	-0.00163917	8.53736e-05	0.483003	0.0908779	0.331194	0.171525	0.308136	0.492931	0.255916	0.546576	0.473525	0.520864
AT1G54010	-0.0370194	0.017019	0.999655	-0.0142876	-0.0031861	-0.000824702	6.86269e-05	0	0.0155245	2.46681e-05	0.0104553	0.0022954	0	0.0670456	0.000291668	0.0858437	0.0152337
AT1G54030	-0.182358	0.0215078	0.96789	-0.0884842	-0.00271418	-0.00350546	3.79611e-05	0	4.02467e-14	0.0698981	4.01653e-08	0.394866	0	1.31512e-12	0.192552	2.25578e-06	0.606541
AT1G54040	0.00578496	0.000195438	0.995028	0.00504013	0.000124806	-0.00013735	3.90273e-07	0	0.228236	0.8174	0.548104	0.980687	0	0.462912	0.914137	0.809929	0.998352
AT1G54050	-0.00287431	-0.00517546	0.982668	-0.00530538	0.00246132	-0.000306875	-8.15212e-05	0	0.619429	0.0728331	0.590156	0.0462847	0	0.821335	0.198932	0.83291	0.15291
AT1G54100	2.55548e-05	2.55548e-05	1.00001	-7.67877e-06	-2.89913e-06	4.53486e-08	8.06155e-08	0	0.751686	0.35044	0.972675	0.383532	0	0.895248	0.565867	1	0.595544
AT1G54110	-0.0398043	0.0286484	0.12827	-0.0307213	-0.00540566	-0.000414768	0.000172481	3.19403e-07	0.232733	0.100753	0.767744	0.0788272	3.42297e-07	0.46912	0.249894	0.927201	0.221357
AT1G54130	-0.00239125	-0.0242052	0.95167	8.29444e-05	0.00178289	-0.00028629	-9.2696e-06	0	0.985771	0.00273258	0.259163	0.601083	0	1	0.0159655	0.580777	0.773497
AT1G54150	0.027608	-0.0586802	0.74906	0.019778	0.00185544	-0.000160104	5.42664e-05	1.50408e-61	0.670072	0.754737	0.949592	0.759111	1.8454e-61	0.851665	0.878534	0.993954	0.877673
AT1G54180	-0.0685255	0.00639212	0.636602	-0.14198	-0.0046121	0.00123405	0.000160775	1.13574e-21	0.0376045	0.597576	0.740455	0.536838	1.27667e-21	0.135763	0.770861	0.915357	0.721619
AT1G54220	-0.0494429	0.0677693	0.919981	-0.00269299	-0.00301699	-0.00249094	-3.94648e-05	1.7709e-305	0.915107	0.350599	0.0707009	0.681958	2.80757e-305	0.977897	0.565921	0.295085	0.832054
AT1G54320	-0.0802449	-0.00239844	0.959197	-0.00600991	0.00273775	-0.00356245	-8.51238e-05	0	0.514716	0.0203557	1.45186e-12	0.0154908	0	0.747694	0.0770249	1.71663e-10	0.0684703
AT1G54340	-0.0314608	0.00726664	0.908763	-0.0434353	-0.00360195	0.000823927	0.000139113	0	9.04477e-05	0.0111654	0.173438	0.00100502	0	0.000809525	0.0486456	0.476755	0.00769917
AT1G54350	0.287108	0.184283	0.92775	0.0484384	-0.00734506	0.0102107	-0.000120995	0	0.0466036	0.0183528	1.48442e-14	0.192273	0	0.15984	0.0712613	2.34017e-12	0.3933
AT1G54360	0.00349544	0.0791031	0.148241	-0.0388483	-0.00550819	0.00131152	6.9452e-05	1.16889e-25	0.00747564	0.00303326	0.0978647	0.209681	1.32958e-25	0.036829	0.0173169	0.356603	0.414472
AT1G54370	-0.0225817	-0.0918932	0.578549	0.0412819	0.00949648	-0.00343885	-0.000174194	3.12504e-115	0.112518	0.00432558	0.0153835	0.0789834	4.13938e-115	0.297607	0.0230407	0.112205	0.221657
AT1G54380	-0.0237121	0.161453	1.02328	-0.0443049	-0.00752611	0.00350756	-0.000166098	0	0.0984651	0.0282462	0.0164914	0.104167	0	0.272332	0.09838	0.117035	0.266451
AT1G54390	-0.0130263	-0.0174846	0.0452249	-0.00744431	-0.00138443	-0.00148666	0.000157232	0.136117	0.810999	0.728139	0.381358	0.185187	0.140398	0.927759	0.861526	0.692114	0.383962
AT1G54440	-0.459083	-0.103692	0.51421	-0.390161	0.0170307	-0.00438194	-0.000400167	6.95669e-42	1.14031e-23	0.000622671	0.0389608	0.00697134	8.24055e-42	6.87706e-22	0.00474985	0.204978	0.0366945
AT1G54450	-0.0173087	0.0207901	0.902427	-0.0701102	-0.00940184	0.00483491	0.00024293	4.08179e-22	0.464027	0.442795	0.354651	0.505697	4.59867e-22	0.71047	0.652074	0.674618	0.697177
AT1G54460	-0.0136137	-0.0129003	0.978067	0.000925501	-3.75168e-05	-0.000260413	2.70436e-05	0	0.871082	0.958993	0.402586	0.213522	0	0.955863	0.989769	0.706984	0.419555
AT1G54490	0.0287045	-0.0169901	0.902026	-0.000514228	0.00450932	0.0011846	-0.000133179	0	0.958273	0.000335722	0.027152	0.000378605	0	0.993307	0.00282736	0.162668	0.00340896
AT1G54510	-0.0410947	-0.0832665	0.629654	-0.114151	0.0081898	0.00396544	-9.09195e-05	6.00049e-71	0.00164864	0.0775947	0.0450694	0.510827	7.48583e-71	0.0103454	0.208263	0.226908	0.70249
AT1G54520	0	0	0.999981	-4.66752e-05	3.432e-06	2.0592e-06	-1.0725e-07	0	0.0908779	0.331194	0.171525	0.308136	0	0.255916	0.546576	0.473525	0.520864
AT1G54570	-0.0229199	-0.0217963	0.873716	-0.0219481	-0.0023821	0.000240614	0.000148487	0	0.19523	0.271868	0.794643	0.0215217	0	0.422486	0.48604	0.940349	0.0864909
AT1G54580	0.000368873	-0.0116481	0.976217	0.00433721	0.00119773	-0.000141009	-2.02762e-05	0	0.00395681	4.98233e-10	0.0859315	0.000409626	0	0.0215883	1.62805e-08	0.331402	0.00363366
AT1G54610	-0.00870219	-0.0116476	0.926177	0.000381652	0.00080965	-0.000684021	1.59242e-06	0	0.97117	0.548997	0.235097	0.968446	0	0.99882	0.734339	0.553178	0.991539
AT1G54630	0.00131876	-0.0156981	0.962648	0.00624238	0.00108722	-0.000207097	-1.01847e-05	0	0.0050941	0.000137273	0.0884986	0.230602	0	0.0266602	0.0013207	0.336352	0.439666
AT1G54650	0.0130774	-0.0235676	0.811302	0.0130688	-0.00309129	-0.000888579	0.000204778	0	0.466809	0.178514	0.364446	0.00278023	0	0.713298	0.369528	0.68199	0.0178196
AT1G54660	0.0564746	0.00812061	0.846072	0.0212359	-0.00239922	0.000958456	0.000108017	3.68017e-199	0.46134	0.515372	0.542235	0.325654	5.37199e-199	0.708186	0.708341	0.808449	0.537462
AT1G54680	0.0211106	-0.0405656	0.871324	0.0373848	0.0045643	-0.000714199	-0.000107607	0	0.0712926	0.0852299	0.527653	0.173252	0	0.216944	0.222186	0.797877	0.368834
AT1G54730	-0.0636294	-0.0389727	0.355192	-0.0685355	-0.0118125	0.000866258	0.000593558	3.70804e-24	0.0565247	0.0102001	0.65862	1.4751e-05	4.20129e-24	0.183263	0.0454879	0.875236	0.000208744
AT1G54820	-0.0315842	0.10305	0.957232	-0.0414115	-0.0090028	0.00200691	8.24719e-05	1.16097e-213	0.188317	0.0253893	0.242537	0.491904	1.72125e-213	0.412132	0.0908595	0.562747	0.687122
AT1G54850	-0.00429587	0	1.00067	-0.00262494	-0.000317432	-0.000262858	1.10175e-05	0	0.765466	0.777973	0.583986	0.742572	0	0.902717	0.891693	0.829807	0.870094
AT1G54920	-0.0014949	0.0100914	0.794383	0.00520159	0.00363904	-0.00057414	-0.000167393	0	0.71885	0.0490098	0.46639	0.00237352	0	0.877184	0.148634	0.755404	0.0156367
AT1G55020	-0.00513402	-0.0169694	0.946006	0.0129225	0.000624681	-0.000454723	-1.07141e-06	0	0.0203529	0.380765	0.134578	0.959761	0	0.0831323	0.593149	0.425122	0.987987
AT1G55040	-0.0376889	-0.0492439	0.851004	0.0988187	0.016325	-0.00771929	-0.000545986	2.34998e-188	0.000922108	1.88419e-05	2.09307e-06	1.56987e-06	3.39555e-188	0.00627732	0.000230361	7.74005e-05	2.80454e-05
AT1G55080	-0.0847496	-0.00753038	0.960722	-0.0277962	-0.0028745	-0.00127947	9.4206e-05	0	0.152441	0.247424	0.227288	0.203301	0	0.361053	0.457951	0.543484	0.40751
AT1G55110	0.00111521	-0.0406232	0.90953	0.0276448	0.00132151	-0.00100398	3.56112e-05	0	0.000164581	0.159179	0.0121292	0.202927	0	0.00138476	0.34236	0.0952739	0.407122
AT1G55120	-0.0096992	0.0153499	0.970769	-0.00824137	0.00158182	0.00013824	-0.000105468	5.42645e-244	0.781408	0.680234	0.932153	0.356865	8.26615e-244	0.910067	0.831418	0.989176	0.56924
AT1G55130	0.0428311	0.0205208	0.882397	0.0287851	0.00105334	0.000819523	-9.9757e-05	4.93108e-260	0.273361	0.754062	0.56757	0.319355	7.59524e-260	0.522964	0.878062	0.819553	0.532416
AT1G55140	0	0	0.99981	0.000193363	3.45292e-05	-2.07175e-05	-1.07904e-06	0	0.4863	0.331194	0.171525	0.308136	0	0.727392	0.546576	0.473525	0.520864
AT1G55150	0.098425	0.0598675	0.881695	0.0969498	-0.00251678	-0.00195736	2.77138e-05	0	5.41052e-06	0.35609	0.0923376	0.733062	0	6.23319e-05	0.571521	0.344579	0.863342
AT1G55205	0.0281333	0.00926973	0.013921	0.00245574	-0.000336127	0.000340685	1.15684e-05	0.238477	0.840257	0.828622	0.61384	0.804514	0.245105	0.943111	0.920921	0.848088	0.90401
AT1G55250	-0.306033	0.0184956	0.62372	-0.309187	0.000402579	0.00065236	-8.22447e-05	7.9993e-34	4.69221e-09	0.952463	0.820773	0.682728	9.29424e-34	8.44974e-08	0.987055	0.94994	0.832541
AT1G55270	-0.00213937	-0.00629579	0.985132	0.00130837	0.00099447	-0.000173203	-2.63393e-05	0	0.810042	0.153287	0.559704	0.204304	0	0.927384	0.333358	0.815156	0.408299
AT1G55280	0.116414	-0.0524604	0.763043	0.0803035	0.00119442	0.000977451	4.7986e-05	1.51979e-130	0.0126357	0.771874	0.577922	0.695856	2.05304e-130	0.0571709	0.887531	0.826154	0.84
AT1G55300	-0.00547364	-0.0148182	0.956403	-0.00140838	0.00125406	4.42961e-05	-1.28053e-05	0	0.843158	0.168514	0.909184	0.636997	0	0.945541	0.356046	0.981818	0.798575
AT1G55310	-0.102875	0.059329	0.509052	-0.0790705	-0.031392	0.000175671	0.0011041	2.85623e-70	0.00729241	8.35091e-17	0.912987	8.49932e-23	3.55732e-70	0.0360846	7.98312e-15	0.983941	1.90937e-20
AT1G55320	-0.0363435	-0.196698	0.753219	0.143055	0.0051001	-0.00557983	9.42664e-05	1.60898e-28	0.0402841	0.567682	0.142573	0.722964	1.84582e-28	0.14321	0.749894	0.436914	0.857142
AT1G55325	-0.107458	0.00585197	0.962631	0.00229693	0.00612407	-0.00669329	-0.000214957	0	0.916513	0.0289245	2.15185e-08	0.0100695	0	0.978354	0.100082	1.25562e-06	0.0486426
AT1G55350	0.00123709	0.00123709	0.999752	-0.00144005	9.53963e-05	7.35417e-05	-6.9198e-06	0	0.36611	0.639814	0.397531	0.254603	0	0.622297	0.803209	0.703607	0.46672
AT1G55370	0.0181818	0.0312881	0.9272	0.0320615	-0.00252534	-0.000970733	5.14713e-05	0	0.0878622	0.29337	0.343512	0.472278	0	0.250406	0.511046	0.664685	0.670018
AT1G55475	-0.0870695	-0.148196	0.184434	0.013913	0.00345155	-0.00311426	0.000276267	1.16028e-07	0.696764	0.449876	0.109839	0.042371	1.24463e-07	0.865393	0.657866	0.379183	0.143732
AT1G55500	0.0153713	0.0510633	0.939171	-5.98163e-05	0.00352213	3.25975e-06	-0.000239461	0	0.997693	0.183295	0.997696	0.00239471	0	1	0.375144	1	0.0157072
AT1G55510	0.0200032	-0.0547931	0.900212	0.0806637	0.00350388	-0.00259066	-1.96373e-05	0	3.33207e-56	8.19089e-08	1.41651e-20	0.313101	0	6.37063e-54	1.77786e-06	4.38924e-18	0.526188
AT1G55520	-0.0030291	-0.0412842	0.908284	0.0101793	0.00358781	-0.000512812	-5.02892e-05	0	0.183943	0.000251815	0.219828	0.0850784	0	0.40682	0.00223157	0.535506	0.232234
AT1G55540	-0.0242967	0.0981642	0.943418	-0.0754881	-0.0146571	0.00229646	0.000432144	1.60672e-140	0.0490324	0.0028163	0.27238	0.00311841	2.20091e-140	0.165183	0.0163801	0.595381	0.0196508
AT1G55590	0.0421946	-0.189211	0.190777	-0.000337237	0.014389	0.000486397	-0.0001037	5.02537e-08	0.992507	0.00173636	0.80391	0.448718	5.39845e-08	1	0.0110738	0.943106	0.651613
AT1G55620	0.0126682	-0.0135595	0.853952	0.00634828	0.00675342	-0.000487505	-0.000242041	0	0.753877	0.00913452	0.658966	0.00171385	0	0.896098	0.0416664	0.875236	0.0119385
AT1G55750	-0.0849933	-0.0563834	0.362165	-0.286063	0.0288033	0.00446501	-0.00087233	5.85344e-08	2.9733e-05	0.00101594	0.232226	0.00083741	6.28648e-08	0.000302926	0.00714337	0.549187	0.00661226
AT1G55760	-0.00838717	-0.0198849	0.963385	0.0147883	0.000434513	-0.000527393	2.75659e-05	0	0.182758	0.759627	0.383782	0.514743	0	0.405097	0.881043	0.694077	0.705634
AT1G55820	0.00787127	0.0130261	0.986375	-0.00409776	0.000766734	0.000647744	-7.20058e-05	0	0.574568	0.411681	0.103846	0.00966765	0	0.790944	0.623313	0.36766	0.0471882
AT1G55830	0.0220582	0.0332231	0.601352	0.0781165	-0.00750266	-0.00373036	0.000275833	2.41295e-42	0.0842131	0.194889	0.130663	0.109724	2.86317e-42	0.243315	0.390996	0.417956	0.276555
AT1G55840	-0.0716449	0.0488332	0.891947	-0.0134148	0.0105435	-0.00331376	-0.000529824	0	0.452521	3.93428e-06	0.000670144	7.08198e-15	0	0.700251	5.91195e-05	0.0102266	5.89247e-13
AT1G55860	-0.0990165	0.0151983	0.967418	-0.0148819	0.00286024	-0.00314075	-0.000135347	2.38919e-79	0.777317	0.670946	0.273922	0.499848	3.02385e-79	0.907965	0.825342	0.596428	0.692864
AT1G55870	0.071091	-0.150267	0.52318	0.115948	0.0229919	-0.00423085	-0.000505828	1.15832e-26	0.0209488	0.000345524	0.12251	0.00823489	1.32056e-26	0.0850635	0.00289364	0.403249	0.0416191
AT1G55880	0.314982	0.0254474	0.656413	0.272771	0.00155477	0.000827932	-0.000111628	1.19768e-68	1.31563e-12	0.752016	0.693126	0.446414	1.48795e-68	3.62647e-11	0.877443	0.892989	0.649316
AT1G55930	0.0172601	0.0604396	0.943569	-0.0473038	-0.00198834	0.00277754	-6.06914e-05	0	0.0191409	0.441487	0.0116846	0.43041	0	0.0792991	0.651001	0.093083	0.637597
AT1G55940	0.0587284	-0.141934	0.448919	0.00540678	0.0134995	-0.000555883	-6.73151e-05	3.63888e-27	0.899153	0.0133924	0.811233	0.678949	4.15489e-27	0.971479	0.0560259	0.946974	0.829956
AT1G55960	0.0152698	0.00912158	0.987174	0.00133186	-0.000216856	0.000399847	-4.89659e-06	0	0.743643	0.677271	0.0719108	0.752458	0	0.890034	0.829941	0.298471	0.876194
AT1G55980	-0.00721195	-0.0366132	0.853992	0.00339636	0.0039873	2.51302e-06	-9.44241e-05	0	0.740731	0.00239577	0.996419	0.015816	0	0.88891	0.0144292	1	0.0695996
AT1G56010	0.00271885	0.0114394	0.973856	-0.00422448	-0.00193114	0.000353455	5.04669e-05	0	0.316248	0.000342514	0.124285	0.00168565	0	0.568973	0.0028738	0.40692	0.0118061
AT1G56050	-0.00125775	-0.00163743	0.995851	-0.00342567	0.000288669	0.000129645	-7.88666e-06	0	0.127337	0.315278	0.290193	0.357158	0	0.319624	0.53384	0.614149	0.569348
AT1G56070	-0.000130245	-4.56928e-05	1.00002	-8.09822e-05	-1.40339e-05	9.47551e-07	5.25323e-07	0	0.493475	0.353643	0.883233	0.243906	0	0.73245	0.569941	0.972687	0.455853
AT1G56090	0.0986005	0.0312584	0.582023	0.122237	-0.00203686	-0.00267314	1.18881e-05	1.14789e-58	0.000946155	0.66677	0.185085	0.932782	1.40206e-58	0.00641188	0.822903	0.490727	0.973529
AT1G56110	0.00094902	0.0105137	0.974763	-0.0049984	0.00142839	0.000271864	-8.64343e-05	0	0.329349	0.0293536	0.330807	9.65759e-06	0	0.583867	0.101372	0.6539	0.000144158
AT1G56140	-0.0403063	-0.00515072	0.726948	-0.0937482	0.00669624	0.00063228	-0.000200348	1.60033e-101	0.00716563	0.133289	0.739556	0.131685	2.08929e-101	0.0354963	0.30384	0.914815	0.310012
AT1G56145	-0.162144	-0.019354	0.986434	-0.131204	-0.00201797	-0.000966251	8.38535e-05	0	2.48301e-15	0.341385	0.285339	0.184549	0	8.71574e-14	0.557682	0.608606	0.383081
AT1G56180	-0.00119569	-0.0106159	0.0266805	-0.00738499	0.000335117	0.000379945	1.09959e-05	2.32198e-12	0.0584476	0.502113	0.0743289	0.459839	2.53497e-12	0.18791	0.697449	0.304708	0.659977
AT1G56200	-2.55857e-05	-0.00106118	0.997442	0.00120345	0.000103918	-3.51026e-05	-2.06394e-06	0	0.0179887	0.110321	0.205893	0.287162	0	0.0756771	0.266707	0.520731	0.502227
AT1G56210	0.00942205	-0.0266387	0.912497	0.0446379	0.00175647	-0.0019813	-9.87403e-06	0	0.0192649	0.471651	0.0568915	0.891977	0	0.0796867	0.674775	0.259263	0.951075
AT1G56220	-0.00757251	-0.012674	0.921521	1.84645e-05	0.00110248	-0.000243784	-1.64812e-05	0	0.996263	0.0288156	0.256958	0.272744	0	1	0.0998215	0.578268	0.486768
AT1G56230	-0.199401	-0.210044	0.397302	-0.285415	0.0184004	0.00556271	-0.000297654	2.27338e-28	1.0304e-14	9.70534e-05	0.00571784	0.0343283	2.60702e-28	3.46787e-13	0.000975528	0.0549524	0.122849
AT1G56260	-0.0175138	-0.0654439	0.88589	0.0272761	0.0072079	-0.00113191	-0.000162772	0	0.221025	0.0114809	0.351895	0.055393	0	0.453731	0.0497431	0.673251	0.173739
AT1G56280	-0.000701797	-0.000134219	0.00308075	-0.000907868	-3.27474e-05	3.21559e-05	5.92059e-07	4.32535e-10	0.072978	0.613213	0.244394	0.759053	4.68172e-10	0.220579	0.782051	0.564448	0.877673
AT1G56290	0.00175671	0.0013145	0.997243	-0.00197565	-0.000115699	0.00011571	5.86093e-06	0	0.363694	0.677572	0.32947	0.479642	0	0.61979	0.830164	0.652406	0.676399
AT1G56300	-0.00999155	-0.111146	0.194838	0.0386045	0.0111167	-0.00205527	-0.00017176	3.6966e-34	0.0185969	1.17604e-07	0.0216321	0.00601686	4.29724e-34	0.077542	2.46338e-06	0.139846	0.032689
AT1G56320	-0.0070459	-0.0104704	0.893998	-0.0161225	0.00773533	4.10209e-05	-0.000271933	0	0.346653	0.000416883	0.964991	3.12856e-05	0	0.602519	0.00340246	0.999483	0.000407438
AT1G56340	0.00175566	0.00175566	1.00037	0.000663925	-0.000198066	1.06918e-05	5.85543e-06	0	0.515488	0.129428	0.847769	0.132447	0	0.748211	0.297332	0.960952	0.310911
AT1G56350	0.215494	0.22555	0.720867	-0.0806264	-0.00285309	0.0131162	-0.000309674	6.99947e-40	0.149597	0.690228	1.73232e-05	0.146552	8.25857e-40	0.356006	0.837934	0.000477504	0.3308
AT1G56420	0.0108607	0.0136523	0.920043	-0.0221514	0.00025251	0.00151824	-3.112e-05	0	0.0844405	0.877818	0.0301736	0.524847	0	0.243315	0.948174	0.174426	0.713831
AT1G56460	0.00197425	0.00219087	0.995564	-0.00690435	0.000186673	0.000474936	-1.22232e-05	0	0.0298796	0.646287	0.00617612	0.313194	0	0.11377	0.808174	0.0581376	0.526246
AT1G56500	-0.00418066	-0.0107777	0.916007	-0.00166124	-0.000594383	-0.000164177	5.15228e-05	0	0.844312	0.582874	0.722024	0.110104	0	0.945772	0.760521	0.90655	0.276989
AT1G56520	0	0						1	1	1	1	1	1	1	1	1	1
AT1G56550	0.00115426	-0.000888943	0.985873	0.00471921	-0.000129583	-0.000107705	5.84544e-06	0	0.1432	0.753373	0.540241	0.6343	0	0.344985	0.878027	0.807006	0.796715
AT1G56560	-0.00641905	-0.0107592	0.963439	0.00836259	0.000238631	-0.000889755	1.54567e-05	0	0.503968	0.881518	0.192472	0.745933	0	0.740443	0.949675	0.500754	0.871985
AT1G56590	-0.0530956	0.0564936	0.96065	-0.00579733	-0.0028228	-0.000634864	-6.14409e-05	0	0.80353	0.343742	0.617505	0.489162	0	0.923462	0.55999	0.850343	0.685315
AT1G56630	-0.0505549	0.0194196	0.942882	-0.0322178	-0.00215309	-6.97624e-05	7.73438e-05	1.83812e-69	0.565437	0.764714	0.98185	0.719519	2.28677e-69	0.784956	0.884506	1	0.855118
AT1G56700	0.00220935	-0.0391651	0.922804	0.0131289	0.00364802	-0.000447269	-5.76333e-05	0	0.00155342	6.30317e-12	0.0481402	0.000268376	0	0.00983033	2.96546e-10	0.236752	0.00254123
AT1G57560	-0.0163398	0.0227152	0.0519815	-0.00403642	-0.00203944	0.000393428	2.04633e-05	0.00192485	0.814393	0.353871	0.674897	0.754884	0.0020223	0.92858	0.569941	0.881448	0.876744
AT1G57600	-0.00563644	0.0353609	0.863445	0.0236714	-0.00150897	-0.00138576	-4.29136e-05	1.05922e-211	0.406644	0.679275	0.373221	0.693119	1.56755e-211	0.660181	0.831036	0.689832	0.838885
AT1G57610	-0.0565656	0.0295856	1.00366	-0.00550838	-0.00273712	1.84457e-05	-2.59666e-05	0	0.764845	0.245338	0.985351	0.71146	0	0.902428	0.455404	1	0.850157
AT1G58025	0	0						1	1	1	1	1	1	1	1	1	1
AT1G58060	0.0587677	-0.0860517	0.716019	0.0209958	0.0139548	-0.000297039	-0.000333083	8.99289e-125	0.497086	0.00041908	0.860211	0.00471299	1.2063e-124	0.734996	0.00341419	0.964459	0.0270613
AT1G58080	0.0401488	0.0294188	0.988067	0.00815504	-0.00155316	0.0014492	-6.77549e-06	0	0.000474486	1.96822e-07	5.03242e-30	0.446257	0	0.0035325	3.94786e-06	4.52213e-27	0.649298
AT1G58160	0	0						1	1	1	1	1	1	1	1	1	1
AT1G58180	-0.232178	0.0490117	0.815633	-0.0488131	-0.00700898	-0.00748482	0.000138543	0	0.00189002	0.000488543	2.4838e-18	0.020709	0	0.0116736	0.00389558	6.19985e-16	0.0843264
AT1G58190	-0.0102925	-0.017915	0.133216	-0.0233886	0.00603593	-0.000206043	-0.000208451	1.49654e-19	0.12164	0.00179422	0.802616	0.000295769	1.67346e-19	0.311589	0.0113622	0.942775	0.00275704
AT1G58220	-0.000813945	0.00320596	0.995271	-0.000100044	-0.000299214	-0.000226257	3.4671e-06	0	0.991005	0.79214	0.640254	0.918371	0	1	0.898872	0.865551	0.966446
AT1G58230	0.055495	-0.0231356	0.790721	0.0680141	0.00286153	-0.00147834	-3.54614e-05	1.5227e-124	0.0465754	0.512826	0.427825	0.785474	2.04223e-124	0.159804	0.706354	0.72694	0.893452
AT1G58250	-0.115163	0.0581612	0.909459	-0.0386967	-0.0133869	-0.000686999	0.000385301	2.71104e-125	0.323413	0.00758424	0.747947	0.00990307	3.6382e-125	0.57726	0.0361933	0.91755	0.0480942
AT1G58270	-0.000442605	-0.00645113	0.977405	-0.00430879	0.00131909	0.000132533	-3.35595e-05	0	0.123985	0.00023254	0.385779	0.00167311	0	0.314324	0.00207715	0.695758	0.0117366
AT1G58280	-0.0123449	-0.000935431	1.00224	-0.00291477	-0.000528377	-1.98392e-05	1.38761e-05	0	0.636519	0.503133	0.952984	0.555088	0	0.831723	0.698519	0.995526	0.736457
AT1G58350	0.0570016	0.0569532	0.943668	0.0155031	-0.00412012	0.00279609	-4.83181e-06	0	0.512057	0.17323	0.0301935	0.957251	0	0.746366	0.362348	0.174426	0.986903
AT1G58370	-0.0245914	-0.0370416	0.851944	-0.0369743	0.00263159	0.00147061	-6.40422e-05	0	0.0980793	0.357443	0.227798	0.452279	0	0.271851	0.572138	0.54398	0.654247
AT1G58400	0.0175249	0.0109761	0.969871	-0.0668834	0.00233456	0.00344199	-0.0001138	0	0.000296887	0.323614	0.000642643	0.106346	0	0.00231583	0.54193	0.0098546	0.270639
AT1G58520	0.110444	0.0760102	0.912723	-0.0503615	-0.00475785	0.00281514	0.000169304	1.4787e-97	0.259577	0.405137	0.248021	0.320122	1.91962e-97	0.506417	0.617891	0.568116	0.533398
AT1G58807	-0.0540211	0.0779516	0.644123	-0.112895	-0.0129634	0.00293344	0.000364897	5.22825e-129	3.65285e-05	0.000211202	0.0492609	0.000464615	7.05209e-129	0.000365529	0.001923	0.239298	0.00402219
AT1G59218	0.00732445	-0.0307124	0.929367	0.00937594	0.000923167	-9.68504e-05	3.33275e-05	0	0.242662	0.368575	0.824918	0.275965	0	0.48328	0.582076	0.951934	0.48988
AT1G59520	-0.0647614	-0.0028493	0.772193	-0.0226716	-0.000437982	-0.000580566	-3.01181e-05	8.5694e-253	0.331097	0.883327	0.64824	0.734842	1.31206e-252	0.584807	0.950059	0.869935	0.864418
AT1G59540	-0.00641882	-0.0180352	0.961094	0.00896551	0.00109635	-0.000286854	-2.44161e-05	0	0.472981	0.497078	0.674495	0.612102	0	0.719509	0.693916	0.881441	0.780745
AT1G59560	0.0328889	-0.240844	0.298783	-0.133659	0.00919038	0.00308845	0.000256833	0.000103995	0.09058	0.363074	0.473493	0.393629	0.000110175	0.255916	0.578062	0.758839	0.605573
AT1G59600	0.0431743	0.143239	0.951449	-0.0201827	-0.00916675	0.0025425	4.80365e-05	0	0.408049	0.0033141	0.0560783	0.605476	0	0.660401	0.018578	0.257628	0.776506
AT1G59610	-0.00707347	0.0220833	0.979232	0.00802344	0.0035386	-0.00132427	-0.00018179	0	0.175118	2.95216e-06	4.09082e-05	7.68764e-16	0	0.394785	4.61358e-05	0.000967371	7.04909e-14
AT1G59620	0	0						1	1	1	1	1	1	1	1	1	1
AT1G59650	-0.00434954	-0.0134857	0.968126	0.00195015	0.00145545	-0.000196292	-2.88327e-05	0	0.636072	0.00577444	0.382628	0.0664692	0	0.831623	0.0290818	0.693437	0.196348
AT1G59710	-0.00235164	-0.0354012	0.274238	-0.0354451	0.00439064	0.00152105	-0.000111082	3.29165e-32	0.136632	0.149556	0.24167	0.221086	3.81219e-32	0.335367	0.328024	0.562137	0.427519
AT1G59740	0.0208133	-0.0180688	0.948824	0.0297503	0.00124408	-0.000541273	2.29429e-06	0	0.0010496	0.284151	0.274464	0.947146	0	0.00700201	0.499879	0.596887	0.982263
AT1G59750	0.0609896	0.0885083	0.88641	-0.0194102	-0.00678383	0.0032162	9.79863e-05	0	0.222999	0.000872103	0.000214591	0.106588	0	0.456359	0.00630468	0.00393533	0.271101
AT1G59820	0.0228881	-0.0326249	0.838793	0.0558782	0.00511343	-0.00116895	-0.000107664	7.38876e-229	0.035966	0.133587	0.421257	0.289121	1.11122e-228	0.131271	0.304101	0.722408	0.503691
AT1G59830	0.0011875	-0.00620552	0.987075	0.00553458	0.00053747	-0.000210492	-7.67824e-06	0	0.0136705	0.0612596	0.0856109	0.369522	0	0.0606033	0.175209	0.331024	0.581324
AT1G59870	0.000231619	0.000101221	0.999868	0.000143561	3.02471e-06	-4.28773e-06	-6.52814e-08	0	0.257443	0.85206	0.535267	0.892544	0	0.504469	0.933937	0.803392	0.951412
AT1G59890	0.000641908	-0.153968	0.741688	0.0415044	0.0214786	-0.00232217	-0.000520035	6.73382e-58	0.381617	0.0004018	0.369559	0.00403148	8.20921e-58	0.635627	0.00329432	0.686549	0.0241351
AT1G59900	-0.038795	0.00286489	0.983694	-0.0244023	0.00138363	-0.000453815	-7.44062e-05	0	8.77596e-11	0.00404352	0.0270179	2.12088e-07	0	1.97152e-09	0.0218195	0.162397	4.69414e-06
AT1G59940	0.00446955	0.00589725	0.908711	0.0142764	0.00437022	-0.00116777	-0.000169679	0	0.434339	0.0614111	0.241119	0.0147916	0	0.685573	0.175466	0.561061	0.0662929
AT1G59990	-0.0017046	-0.00390595	0.975705	-0.0150974	0.00260999	0.000677931	-9.40607e-05	0	0.0846458	0.0210652	0.156693	0.00531377	0	0.243713	0.0792678	0.458794	0.0296803
AT1G60000	-0.000296148	0	1.00008	9.83303e-05	-3.10801e-05	-6.84457e-06	1.06946e-06	0	0.623746	0.225551	0.531375	0.161641	0	0.824168	0.431235	0.80009	0.353296
AT1G60010	0.000622497	-0.00134683	0.987985	0.00372289	0.000297619	-0.000180373	-9.82142e-06	0	0.112495	0.321358	0.158692	0.272066	0	0.297607	0.539358	0.462068	0.486252
AT1G60070	0.00278932	0.00587876	0.99429	-0.00304029	-0.000123319	4.41772e-05	-6.5009e-06	0	0.582755	0.861735	0.883666	0.757973	0	0.797052	0.940436	0.972687	0.877365
AT1G60080	0.0184171	0.0159785	0.989157	0.00549258	-0.00098003	1.43293e-05	3.31997e-05	0	0.670657	0.553146	0.983776	0.500139	0	0.851875	0.737552	1	0.692956
AT1G60110	-0.0450301	0.00649286	0.169724	-0.107261	0.00935106	0.00423969	-0.000469231	0.175218	0.403665	0.56933	0.545141	0.337897	0.180501	0.657363	0.750655	0.809707	0.549863
AT1G60130	-0.0604257	-0.0219436	0.115992	0.0700476	0.0014423	-0.00435965	-6.38191e-05	0.138055	0.382655	0.888266	0.319262	0.834723	0.142381	0.636291	0.952274	0.643192	0.920121
AT1G60140	-0.0133295	-0.0985571	0.733217	-0.0530027	0.0106735	0.00196943	-0.000187208	0	1.39555e-12	7.09638e-29	1.3981e-06	5.23782e-11	0	3.83499e-11	2.27743e-26	5.34611e-05	2.35335e-09
AT1G60160	0.00130322	0.0022869	0.993084	2.39245e-05	0.000815398	7.09971e-05	-4.38657e-05	0	0.995232	0.111373	0.745109	0.00404695	0	1	0.268525	0.917337	0.024203
AT1G60200	-0.0834044	0.0883389	0.727249	-0.0452059	-0.0190006	-0.000322579	0.000547524	3.74589e-159	0.103377	8.76768e-08	0.8313	2.28307e-07	5.24227e-159	0.28031	1.88034e-06	0.955006	4.99165e-06
AT1G60220	0.00891741	-0.00801776	0.932147	0.0119628	0.00507345	-0.000642006	-0.00019727	0	0.436819	0.00995095	0.444314	0.000769274	0	0.687117	0.0445093	0.740332	0.00613916
AT1G60230	0.0636272	0.0680217	0.815068	0.0164096	-0.00549338	0.00177207	7.69158e-05	0	0.42168	0.0355162	0.111714	0.323169	0	0.673399	0.117023	0.383887	0.536394
AT1G60260	-0.129162	0.0499619	0.472875	-0.156122	-0.0281018	-0.000240224	0.00117099	2.64277e-28	0.000384181	5.87031e-07	0.920228	2.82514e-12	3.02908e-28	0.00293273	1.09441e-05	0.985406	1.61699e-10
AT1G60430	0.00894548	0.0140915	0.996303	-0.0133186	-6.08475e-05	0.000733006	-1.67454e-05	0	0.183495	0.962119	0.179657	0.660895	0	0.40623	0.9909	0.484077	0.816667
AT1G60440	-0.0177733	-0.118445	0.683054	0.0449094	0.00548896	-0.0015751	6.63474e-06	6.27905e-147	0.0980603	0.114018	0.287527	0.948881	8.66455e-147	0.271851	0.272927	0.611065	0.982946
AT1G60545	0.0359702	-0.108867	0.0516442	0.00704871	-0.00436584	0.000301574	0.000507017	0.0912586	0.82223	0.27673	0.860134	2.24075e-05	0.0943888	0.93337	0.492317	0.964459	0.000305406
AT1G60550	0.00844882	-0.000330874	0.951132	0.00279835	-0.000794241	0.000417888	3.2329e-05	0	0.686355	0.37036	0.269008	0.221042	0	0.858672	0.583766	0.590626	0.427519
AT1G60560	-0.00439567	0.114876	0.965777	0.0143009	0.001329	-0.000764293	-0.000312711	6.75519e-185	0.675531	0.761104	0.681772	0.0163532	9.73259e-185	0.853598	0.882176	0.886708	0.0711277
AT1G60600	0.0911221	0.151046	0.884398	0.0498852	-0.00996427	-0.000440373	0.000154481	2.15451e-133	0.176579	0.0348786	0.826907	0.272306	2.92056e-133	0.396486	0.115567	0.952163	0.486383
AT1G60610	-0.00920301	-0.037248	0.927789	0.0275211	0.00245848	-0.00118532	-3.3251e-05	0	0.0453084	0.162212	0.114026	0.525794	0	0.156685	0.347222	0.388708	0.714329
AT1G60620	0.0115441	0.0232034	0.994306	0.00287473	-0.0024399	0.000481201	3.49952e-05	0	0.860142	0.242471	0.588773	0.573677	0	0.951057	0.451761	0.83232	0.751247
AT1G60650	0.00907074	-0.00700109	0.955882	0.00251002	-0.000601423	7.21179e-05	4.71686e-05	0	0.619325	0.352153	0.79359	0.0143232	0	0.821319	0.56792	0.939671	0.0645803
AT1G60670	0.00935046	-0.0505921	0.824257	0.00952272	0.00540611	0.000439356	-0.000112741	0	0.657364	0.0490502	0.70757	0.168346	0	0.845316	0.148706	0.899269	0.362424
AT1G60680	-0.106661	-0.0509134	0.900422	-0.0356407	0.00211783	0.000118912	-6.2568e-05	1.46831e-126	0.355842	0.668048	0.954969	0.670692	1.97519e-126	0.612317	0.823618	0.996094	0.824104
AT1G60690	-0.113488	-0.00955059	0.905667	-0.0357353	-0.00650353	-0.00261161	0.000267058	0	0.0731664	0.0108109	0.016381	0.000443717	0	0.220925	0.0474579	0.116548	0.00387111
AT1G60700	-0.0723364	0.0297884	0.90435	-0.100128	0.0045582	0.00117523	-0.000205171	8.5417e-149	0.0050514	0.318464	0.546364	0.131792	1.18068e-148	0.0265139	0.536908	0.809929	0.310022
AT1G60710	0.000285018	-0.00521752	0.98881	0.000936546	0.00018411	3.82379e-05	2.08595e-06	0	0.567909	0.380185	0.669061	0.738612	0	0.78666	0.592717	0.878589	0.867603
AT1G60730	-0.00498932	-0.00409418	0.987629	-0.00346936	0.000419955	-1.66441e-05	-7.27471e-06	0	0.0172926	0.0243132	0.834189	0.190415	0	0.0732631	0.0880961	0.955876	0.390971
AT1G60740	0.00349854	-0.0402284	0.93009	0.006732	0.00447597	-0.000336383	-9.12983e-05	0	0.600535	0.00650495	0.631507	0.0624826	0	0.80904	0.0321173	0.860173	0.188412
AT1G60750	0	0						1	1	1	1	1	1	1	1	1	1
AT1G60780	-0.00914742	-0.00353135	0.98507	-0.00653134	0.000474029	-1.20241e-05	-1.15519e-05	0	0.00609766	0.119772	0.926263	0.203225	0	0.0310269	0.282411	0.987575	0.407493
AT1G60850	-0.0284004	-0.0217116	0.944131	-0.0119093	0.00356689	-0.000561624	-0.000103103	0	0.231448	0.00509023	0.300945	0.00657617	0	0.467334	0.0261526	0.623828	0.0351109
AT1G60860	0.0491876	-0.0243721	0.610486	0.0724825	0.00241299	-0.000623935	-3.08803e-05	2.0814e-23	0.248606	0.76402	0.855546	0.897404	2.35234e-23	0.491957	0.884044	0.963179	0.953535
AT1G60890	-0.00809635	-0.00809635	-0.00260554	0.0123207	-0.000301739	-0.00146465	5.51997e-05	0.885413	0.506531	0.898822	0.147774	0.434997	0.896486	0.742527	0.957496	0.445629	0.640905
AT1G60900	0.00645549	-0.000138295	0.354326	0.0890067	-0.0102315	-0.00290711	0.000408297	1.57861e-33	0.00312975	0.00793735	0.076898	0.000377251	1.83273e-33	0.0179133	0.0374458	0.310075	0.00340018
AT1G60930	-0.0262728	-0.0216484	0.0335927	0.00992838	-0.000979762	-0.000537934	6.04894e-05	0.122075	0.656014	0.731177	0.658216	0.476537	0.12603	0.845017	0.863354	0.875236	0.67372
AT1G60940	-0.0663851	0.000856544	0.976462	-0.0247402	0.0012177	-0.00180741	-4.67366e-05	0	1.47699e-06	0.064014	1.14094e-10	0.0170446	0	1.86495e-05	0.180776	9.32046e-09	0.0732487
AT1G60960	0.00095658	-0.0532055	0.830062	0.0308282	0.00455253	-0.000908641	-7.53106e-05	0	0.032015	0.0133263	0.246673	0.169416	0	0.120321	0.0558797	0.566673	0.363393
AT1G60990	-0.0271522	0.033081	0.913128	0.0229244	0.00059622	-0.00242725	-9.37061e-05	0	0.201243	0.79502	0.013123	0.170568	0	0.431044	0.900889	0.101048	0.364933
AT1G61030	0.0175519	0.00584547	0.855239	-0.00362126	0.00210536	-0.000817101	-7.42771e-05	4.72006e-159	0.91169	0.614273	0.646436	0.550675	6.60456e-159	0.976453	0.783181	0.868681	0.732624
AT1G61065	0.0239562	-0.00040493	0.963233	-0.00915731	0.000578379	0.000453934	4.61192e-06	0	0.553297	0.769783	0.590115	0.937573	0	0.776378	0.887158	0.83291	0.976665
AT1G61100	-0.000413551	-0.00394003	0.981172	0.00134079	0.00101798	-0.000244148	-2.63141e-05	0	0.704007	0.0241629	0.204766	0.0504749	0	0.869648	0.0876635	0.519195	0.162671
AT1G61140	-0.00468326	0.0612243	0.855898	-0.0165566	-0.00448315	5.28272e-05	9.63106e-05	8.08851e-140	0.635042	0.31512	0.977853	0.468898	1.10663e-139	0.830902	0.533673	1	0.666484
AT1G61150	-0.00167786	-0.0438906	0.909612	0.00755865	0.00330606	-3.7872e-05	-3.97043e-05	0	0.262848	0.00012929	0.918094	0.122868	0	0.509811	0.00124908	0.985406	0.297919
AT1G61210	0.00947192	-0.0805353	0.636828	0.0421458	0.0068236	-0.00389626	-2.24986e-05	9.02096e-37	0.413846	0.301108	0.166139	0.908898	1.05619e-36	0.664857	0.518326	0.472743	0.95981
AT1G61240	0.00242526	-0.00919258	0.972561	-0.00371236	0.00102754	0.000252606	-2.05824e-05	0	0.653732	0.331815	0.575814	0.514133	0	0.843907	0.5472	0.824715	0.705034
AT1G61250	-0.0002034	0.000250345	1.00023	-4.47525e-05	-4.46648e-05	1.16277e-06	1.18219e-06	0	0.842082	0.120149	0.924405	0.167407	0	0.944806	0.282683	0.986896	0.36119
AT1G61340	0.0300497	0.0157942	0.961335	-0.0405003	0.00121913	0.0013314	-2.08318e-05	0	0.0355222	0.620855	0.205209	0.776665	0	0.130075	0.788333	0.519585	0.888154
AT1G61370	0.0282267	0.0507782	0.939066	0.00209187	-0.00261596	0.000510399	3.18379e-05	1.30614e-238	0.942901	0.483882	0.748715	0.774909	1.98092e-238	0.986655	0.684535	0.918366	0.887248
AT1G61430	-0.0600144	-0.032578	0.035429	-0.0377678	-0.000224494	-0.000316573	6.55159e-05	0.196302	0.179373	0.95026	0.836558	0.541206	0.201966	0.400657	0.985918	0.957253	0.725537
AT1G61450	-0.0607701	-0.0355123	0.75475	0.0678121	0.00855729	-0.00390522	-0.000330531	1.4401e-35	0.275645	0.282268	0.249819	0.163352	1.67975e-35	0.526003	0.498045	0.570778	0.355122
AT1G61500	0.0617619	-0.247	0.318386	0.182202	0.00312094	-0.0060533	0.000398478	3.95351e-07	0.00347654	0.694234	0.0720106	0.0871322	4.23436e-07	0.01944	0.8403	0.298748	0.235976
AT1G61520	-0.00101208	0.000969368	1.00003	-0.000481565	-8.83424e-05	-1.66013e-05	1.31115e-06	0	0.0102148	0.00023069	0.104579	0.0665868	0	0.0481824	0.00206267	0.369251	0.196631
AT1G61560	-0.106	-0.0267105	0.906948	-0.0627844	-0.00266309	0.000501169	9.14767e-05	0	0.00601691	0.362472	0.687744	0.293784	0	0.0306682	0.577308	0.889896	0.508856
AT1G61590	-0.0171381	-0.0169227	0.945202	-0.00717801	3.06486e-05	-0.000181664	2.71236e-05	0	0.381451	0.976698	0.684723	0.385637	0	0.635469	0.998188	0.887922	0.597833
AT1G61640	0.0192781	-0.0406439	0.89207	0.039955	0.00428026	-0.000879136	-0.000103992	0	0.0664995	0.124415	0.459229	0.210248	0	0.205782	0.289111	0.751484	0.415319
AT1G61660	-0.108997	-0.04697	0.806496	-0.0728393	0.00730683	9.72491e-05	-0.000254455	5.20542e-181	0.0115476	0.0476708	0.950713	0.0206401	7.46146e-181	0.0530549	0.145506	0.994306	0.0841526
AT1G61670	-0.0088676	0.010436	0.982651	-3.29614e-05	0.000249265	-0.000837735	-2.74113e-05	0	0.995805	0.755958	0.0143009	0.251358	0	1	0.879016	0.106971	0.46439
AT1G61690	-0.0256105	0.00028696	0.926194	-0.0178179	0.00781987	0.00154359	-0.000406639	3.05834e-42	0.798415	0.380981	0.685061	0.126267	3.62658e-42	0.920641	0.593326	0.887922	0.303215
AT1G61740	0.00147839	-0.0222283	0.946641	0.0060337	0.00332806	-0.000103564	-8.46903e-05	0	0.0660825	2.31209e-15	0.563103	1.31456e-11	0	0.204906	1.70298e-13	0.816815	6.59925e-10
AT1G61810	0.0679974	-0.0101538	0.0156713	0.158815	-0.00429038	-0.00480358	0.000206359	0.909427	0.213546	0.768229	0.439304	0.608242	0.920179	0.445913	0.886681	0.736627	0.777587
AT1G61850	0.0572238	-0.0287957	0.661675	0.0914346	0.00515622	-0.00260472	-0.000105185	8.0286e-145	0.000557179	0.128166	0.0714854	0.297593	1.10415e-144	0.00403449	0.295308	0.297345	0.512695
AT1G61890	-0.00249085	-0.0236617	0.948367	0.00850591	0.00264401	-0.000397505	-5.22828e-05	0	0.0611278	5.37583e-06	0.108694	0.00253334	0	0.194234	7.7045e-05	0.377537	0.0164722
AT1G62040	0.000224154	0.00184635	0.997963	0.000391653	-0.000234674	-1.45392e-05	6.95568e-06	0	0.786624	0.204884	0.853856	0.207264	0	0.91302	0.404309	0.963037	0.411661
AT1G62130	-0.115952	-0.0124263	0.214109	-0.0338767	-0.00997808	0.000643205	0.000194636	2.76142e-05	0.517912	0.136619	0.821959	0.329819	2.93276e-05	0.749671	0.308768	0.950106	0.540429
AT1G62180	-0.000751974	-0.000492834	0.999588	-4.2475e-06	2.38942e-05	-2.65918e-05	-4.70293e-07	0	0.995209	0.791757	0.490753	0.861542	0	1	0.898551	0.770569	0.934889
AT1G62200	-0.0641986	-0.0674947	0.804322	-0.0808651	0.00534838	0.000135446	-9.23951e-05	4.40662e-236	0.00130321	0.096485	0.921363	0.335198	6.66295e-236	0.00844312	0.242929	0.985406	0.547453
AT1G62250	-0.170007	-0.0146534	0.706475	-0.0608445	-0.00229272	-0.00292457	4.10326e-05	2.82905e-49	0.215443	0.715234	0.27509	0.826541	3.40456e-49	0.44783	0.852626	0.597814	0.916724
AT1G62290	0.00235913	0.00235913	1.00095	-0.000830469	-0.000235639	6.28934e-05	6.50728e-06	0	0.390046	0.0566206	0.23279	0.0772711	0	0.641712	0.1653	0.549765	0.218446
AT1G62300	-0.0212226	-0.0182673	0.906412	0.00214446	-0.000610565	-0.000819793	6.10098e-05	0	0.806656	0.586	0.0863447	0.0677715	0	0.925338	0.762827	0.332146	0.199344
AT1G62305	-0.0810913	-0.041454	0.946811	-0.0658001	-0.00233809	0.000138692	0.000143572	0	0.00245268	0.400193	0.906834	0.0829566	0	0.0146826	0.612943	0.981689	0.228245
AT1G62310	-0.0903431	-0.056481	0.548143	-0.0480615	0.00903475	-0.00144244	-0.000283576	1.26581e-84	0.0957163	0.0143726	0.359396	0.00992111	1.61479e-84	0.266514	0.0590274	0.678983	0.0481377
AT1G62320	0.0134262	0.00333487	0.969496	-0.0429472	0.00141233	0.00221547	-2.92369e-05	0	0.00656609	0.490914	0.0116352	0.632882	0	0.0328158	0.689812	0.0927718	0.795948
AT1G62330	0.147859	-0.0257957	0.726607	0.194398	-5.32495e-05	-0.00227	7.67124e-05	4.84725e-172	3.05603e-13	0.987544	0.118573	0.450351	6.89199e-172	9.00376e-12	1	0.395303	0.652929
AT1G62380	-2.83027e-05	-7.46495e-05	0.999894	7.19639e-05	1.95871e-06	-3.7474e-06	6.1382e-08	0	0.0716043	0.701516	0.0854887	0.686866	0	0.217451	0.842667	0.330865	0.834529
AT1G62400	-0.00761115	-0.00365289	0.988809	0.00888927	-0.00103338	-0.000503689	2.83573e-05	0	0.481728	0.522668	0.464955	0.556045	0	0.726269	0.713878	0.754167	0.737074
AT1G62430	0.00297837	-0.00825355	0.981398	-0.0121354	0.000820013	0.000587436	-1.17347e-05	0	0.0708414	0.340034	0.108951	0.646782	0	0.216157	0.556667	0.377712	0.805542
AT1G62570	-0.00331287	-0.0411906	0.913089	-0.0132341	0.00672334	0.000495124	-0.000158155	0	0.00363775	7.64045e-31	0.0461241	7.77983e-20	0	0.0201783	2.74628e-28	0.23043	1.18491e-17
AT1G62600	0.0104558	-0.00437252	0.662295	0.0642294	0.0097644	-0.00210112	-0.000403561	1.06591e-149	0.0137627	0.0034216	0.139638	4.90348e-05	1.47517e-149	0.060862	0.0190499	0.433002	0.000599493
AT1G62660	0.00372923	0.00507604	0.988959	-0.00292127	0.000282492	0.000206396	-1.79629e-05	0	0.235381	0.369786	0.12435	0.055617	0	0.47329	0.583271	0.406922	0.174198
AT1G62780	-0.0163945	0.036389	0.966655	0.00613052	0.0012775	-0.000902713	-0.000147329	0	0.538403	0.316319	0.0967981	0.0001051	0	0.765399	0.534797	0.355058	0.00114199
AT1G62800	-0.0195009	0.0159497	0.907393	-0.025639	-0.000978552	0.000917819	6.34327e-06	0	0.163789	0.677862	0.360875	0.927993	0	0.377289	0.830164	0.678983	0.971452
AT1G62850	0.0131006	-0.0153771	0.241795	-0.0107231	0.000431349	0.00162231	7.31886e-06	7.38452e-22	0.67789	0.8961	0.249386	0.94072	8.3092e-22	0.854206	0.956627	0.570271	0.978166
AT1G62880	0.000106531	-0.00218604	0.996642	-0.000190554	0.000211125	3.23055e-05	-4.45827e-06	0	0.911556	0.336102	0.729958	0.49542	0	0.976427	0.55295	0.911535	0.689688
AT1G62950	-0.253099	-0.0136349	0.958978	-0.0114178	0.00109266	-0.00641237	-0.000141717	5.51659e-37	0.882169	0.912596	0.127857	0.633132	6.4648e-37	0.962036	0.966481	0.413258	0.795948
AT1G62960	0.00664043	0.00913748	0.999884	-0.0014324	-0.00142913	0.000233997	4.0092e-05	0	0.658106	0.000558623	0.185129	0.00115746	0	0.845665	0.00436883	0.490727	0.00869643
AT1G62970	-0.00920554	0.0231106	1.00235	0.00394961	-0.00249352	-2.86683e-05	3.75375e-05	0	0.759792	0.131361	0.96755	0.44589	0	0.899154	0.300587	1	0.648907
AT1G62975	0.0369383	0.0403447	0.852174	0.0311664	-0.00249839	-0.000666011	2.99741e-05	4.25183e-251	0.227598	0.449656	0.63648	0.760822	6.50553e-251	0.4624	0.657651	0.863605	0.878872
AT1G62990	-0.00112502	-0.00713462	0.956574	-0.00537151	0.00175817	2.1567e-05	-4.26896e-05	0	0.420115	0.0391543	0.952685	0.0928024	0	0.671616	0.125753	0.995445	0.246577
AT1G63020	0	0						1	1	1	1	1	1	1	1	1	1
AT1G63090	-0.0658441	0.00313701	0.935999	-0.0749976	0.00206707	0.000466	-7.25231e-05	0	1.05836e-09	0.18879	0.487178	0.121754	0	2.05853e-08	0.383036	0.768373	0.296017
AT1G63110	0.0329746	-0.027312	0.79345	0.0789277	0.00933112	-0.00248899	-0.000296136	0	3.78329e-05	0.000140454	0.0172309	5.00606e-05	0	0.000377321	0.00134698	0.120778	0.000609546
AT1G63120	-0.0115414	-0.0135889	0.965436	0.00215482	0.00108731	-0.000280937	-2.43156e-05	0	0.663357	0.0860279	0.298222	0.197575	0	0.848806	0.223784	0.62148	0.400047
AT1G63170	0.00788128	-0.00974847	0.960017	-0.00500427	0.00309867	0.000940521	-0.000123247	0	0.326109	2.0087e-06	0.000717013	2.23669e-10	0	0.580001	3.31805e-05	0.0107385	8.93283e-09
AT1G63180	0.000132909	-0.00782885	0.980862	0.0127609	0.000267313	-0.000516601	4.9474e-06	0	0.031054	0.724042	0.109559	0.82641	0	0.117495	0.858682	0.378506	0.916691
AT1G63250	-0.147377	0.242353	0.918161	-0.101904	-0.024986	-0.0025423	0.000343928	9.38127e-33	0.194908	0.0139172	0.554189	0.256358	1.08746e-32	0.422442	0.0575985	0.812148	0.468313
AT1G63260	-0.0192129	0.0190547	0.951676	-0.0115851	-0.00187663	-0.000824022	5.33456e-05	0	0.405169	0.291916	0.277785	0.314661	0	0.658858	0.509154	0.600765	0.527701
AT1G63295	-0.213883	0.0407777	0.8979	-0.304587	0.0112635	0.00200429	-0.000471068	1.74189e-13	0.0143378	0.483474	0.768199	0.325811	1.91002e-13	0.0629715	0.684371	0.927453	0.537462
AT1G63420	-0.150145	0.146431	0.555819	-0.113502	-0.0234712	-0.00287401	0.000759152	6.73649e-43	0.00627737	9.99789e-06	0.204627	1.62679e-06	8.00186e-43	0.031708	0.000132541	0.519195	2.88899e-05
AT1G63430	-0.0150525	-0.00523684	0.922337	0.0108428	0.000721927	-0.00134214	-1.29938e-05	0	0.219971	0.523258	0.00538389	0.699795	0	0.452758	0.714306	0.0524725	0.843056
AT1G63440	-0.00203454	0.0375483	0.960153	-0.00612516	-0.00711534	0.000397944	0.000185735	0	0.807806	0.0271965	0.772049	0.0529923	0	0.926358	0.0958008	0.928909	0.167908
AT1G63460	-0.0222233	0.00754003	0.944949	-0.0189407	-0.00163204	-0.000356115	5.79743e-05	0	0.0927583	0.25758	0.562356	0.177102	0	0.259908	0.470737	0.816594	0.374105
AT1G63470	-0.0319896	-0.00515717	0.948217	-0.0047019	0.00276655	-0.00163061	-8.13325e-05	0	0.721985	0.101773	0.0237078	0.106418	0	0.87803	0.25173	0.148874	0.270745
AT1G63490	-0.105256	-0.16018	0.256177	-0.0731487	0.0210756	-0.000627079	-0.000550029	3.15735e-05	0.246716	0.0090914	0.855563	0.0223214	3.35247e-05	0.489401	0.041533	0.963179	0.0888325
AT1G63610	-0.0560952	0.00436063	0.56817	-0.00860193	0.0024426	-0.00103301	-0.00015671	2.50852e-85	0.77267	0.521417	0.524828	0.167411	3.20284e-85	0.905817	0.71315	0.796356	0.36119
AT1G63660	-0.0260427	0	1.00555	-1.05847e-05	-0.00100986	-0.000639508	3.15582e-05	0	0.999367	0.553987	0.379457	0.53481	0	1	0.738376	0.691276	0.719754
AT1G63670	0.0446211	-0.0112466	0.860044	0.0263793	0.000946908	0.00102455	2.13639e-05	3.24162e-113	0.498995	0.849558	0.630292	0.885793	4.28433e-113	0.736647	0.932128	0.859174	0.947469
AT1G63700	0.000134383	-0.0265773	0.939848	0.00453205	0.00445655	-0.000460933	-0.000110155	0	0.599281	5.38148e-05	0.327303	0.0008077	0	0.807973	0.000582627	0.649711	0.00639471
AT1G63750	-0.00287268	-0.0797116	0.627951	0.0672248	0.00196768	-0.00272362	7.04359e-05	1.37662e-71	0.0619022	0.669288	0.165584	0.607848	1.71977e-71	0.196032	0.824317	0.471762	0.777526
AT1G63770	-0.0527058	-0.0159663	0.959195	-0.239118	0.00419178	0.00790881	-0.00010885	0	5.43643e-79	0.00992845	3.7918e-30	0.0246378	0	1.87891e-76	0.0444555	3.7859e-27	0.095925
AT1G63800	0.0473812	-0.0534415	0.822413	0.0790227	0.000445509	-0.00174797	0.000116755	0	1.44593e-34	0.588969	6.63147e-07	2.00888e-06	0	1.31244e-32	0.76514	2.89274e-05	3.51202e-05
AT1G63810	-0.0749304	0.0114281	0.987457	0.00240339	-0.00261319	-0.00233496	4.56368e-05	0	0.893729	0.256264	0.0173612	0.505789	0	0.96818	0.469191	0.121124	0.697195
AT1G63830	0.0132047	-0.0459676	0.900499	0.00793641	0.00261625	-2.36565e-05	5.30232e-06	0	0.220093	0.00157983	0.94658	0.829834	0	0.452887	0.0102501	0.992529	0.91811
AT1G63850	0.00999539	-0.0370509	0.899561	0.0298822	0.00233911	4.36093e-05	-3.99047e-05	0	0.162236	0.392507	0.970177	0.624429	0	0.375156	0.605671	1	0.790753
AT1G63855	-0.0708219	0.122519	0.396699	-0.0443003	-0.0120685	-0.000605264	0.000238858	7.26557e-16	0.379939	0.0615477	0.825957	0.214295	8.03847e-16	0.634884	0.17564	0.952058	0.420332
AT1G63860	0	0						1	1	1	1	1	1	1	1	1	1
AT1G63880	0.0232483	0.0790322	0.742366	0.0333505	-0.0165262	0.0016325	0.000402288	7.84432e-198	0.188832	3.59164e-07	0.238382	3.21122e-05	1.143e-197	0.412757	6.91102e-06	0.557985	0.000416393
AT1G63900	0.00750642	-0.00514183	0.972482	0.0163044	-0.000334065	-0.000353584	2.29177e-05	0	2.03928e-05	0.495045	0.0903321	0.116191	0	0.000214327	0.693016	0.340072	0.287323
AT1G63940	0.0775971	-0.0501239	0.222175	0.0899567	-0.000544496	-0.000978766	0.00015981	6.44671e-30	7.31447e-06	0.831988	0.371129	0.0366368	7.42313e-30	8.3411e-05	0.922713	0.688158	0.128601
AT1G63970	-0.0163332	-0.0115385	0.952057	0.0288056	-0.000539596	-0.0014008	9.88983e-06	6.04738e-286	0.286535	0.876001	0.34211	0.923533	9.47546e-286	0.539303	0.947873	0.662741	0.969267
AT1G64000	0.0208645	-0.123795	0.536533	-0.0433557	0.00949925	0.00169821	-3.0225e-05	1.02641e-46	0.256004	0.055114	0.423373	0.838024	1.2283e-46	0.50288	0.16206	0.724239	0.921611
AT1G64040	0.000112089	0.000112089	0.999469	-0.000218391	0.000102018	-5.60238e-06	-3.58559e-06	0	0.503102	0.0144899	0.752859	0.00392726	0	0.7404	0.059362	0.920471	0.0236372
AT1G64050	-0.00620694	0.0186522	0.939377	0.000463225	-0.000951883	0.000884917	-4.60638e-05	0	0.975024	0.615073	0.272941	0.414105	0	1	0.783755	0.595881	0.623308
AT1G64060	-0.136827	0.0653846	0.971758	-0.144338	-0.00910076	0.0019066	0.000183312	0	1.88091e-16	5.00018e-05	0.0463056	0.00611255	0	7.16181e-15	0.000547946	0.230883	0.0330888
AT1G64090	-0.00578785	0.00248122	0.99003	-0.00229161	0.000521609	9.11362e-05	-3.79924e-05	0	0.435769	0.165584	0.569938	0.000700338	0	0.686384	0.351842	0.821501	0.00569009
AT1G64110	-0.011417	-0.0197873	0.967351	0.0229578	0.00170479	-0.00177465	-2.24719e-05	0	0.207218	0.460086	0.0847153	0.749632	0	0.43875	0.66672	0.329404	0.87442
AT1G64150	-0.412016	0.0448079	0.760373	-0.468884	0.0179141	6.5973e-05	-0.000730789	1.62886e-43	9.22809e-17	0.0130347	0.982892	0.000675618	1.93661e-43	3.70195e-15	0.0549388	1	0.00552924
AT1G64170	-0.0214293	-0.0334744	0.933627	-0.0112217	0.00350326	-6.01561e-05	-6.99419e-05	0	0.201029	0.0018089	0.900015	0.0365701	0	0.430722	0.0114229	0.979595	0.128464
AT1G64200	0.00471794	0.00999399	1.00403	0.000322744	-0.00167842	9.10156e-05	4.27896e-05	0	0.965775	0.081145	0.824469	0.135625	0	0.996928	0.215352	0.951856	0.315113
AT1G64355	-0.0016675	-0.0260505	0.906211	0.00784994	0.00142952	-0.000599596	1.62729e-05	0	0.274309	0.119707	0.125871	0.552198	0	0.524121	0.282411	0.409216	0.733488
AT1G64385	0.0372155	0.0537435	1.00791	-0.00955251	-0.00311112	0.0018506	1.18312e-05	0	0.20344	0.0012058	6.29146e-06	0.679453	0	0.434024	0.00824604	0.000194628	0.830125
AT1G64390	0.00241559	-0.00803038	0.960267	0.0100686	0.00101147	-5.77488e-05	-2.06758e-05	0	0.194116	0.307939	0.891414	0.48426	0	0.421508	0.525473	0.977232	0.680782
AT1G64430	-0.00780593	0.0226988	0.760609	-0.0546766	0.00173086	0.000692752	-8.11908e-05	0	0.00270311	0.457972	0.486024	0.242629	0	0.0158759	0.6643	0.768301	0.4546
AT1G64530	-0.272545	0.185791	0.915725	-0.0927527	-0.0122869	-0.00528103	-3.76239e-05	5.65295e-65	0.0928402	0.0818461	0.0794328	0.858072	6.98246e-65	0.259976	0.21606	0.316815	0.932701
AT1G64570	-0.0830384	-0.0097716	0.984203	-0.0425004	0.000219011	-0.00191582	2.54163e-06	0	0.0026996	0.903823	0.0131796	0.962463	0	0.0158657	0.960473	0.101397	0.989214
AT1G64600	-0.0987282	0.0202166	0.844659	-0.227144	0.0236383	-3.68013e-05	-0.000770487	8.98041e-49	0.00011937	0.00175118	0.990883	0.000618259	1.08e-48	0.00103739	0.0111366	1	0.00511573
AT1G64630	-0.00837561	-0.0215882	0.934173	-0.019624	0.00137725	0.00146016	-3.26726e-05	0	0.125466	0.400626	0.0366342	0.503368	0	0.316607	0.613188	0.198549	0.695789
AT1G64650	-0.00731886	-0.0108004	0.971297	-0.000361112	0.000787464	-2.94218e-05	-1.14976e-05	0	0.925887	0.112859	0.88951	0.4372	0	0.980787	0.271086	0.975963	0.642421
AT1G64680	0.00291759	-0.0146429	0.955988	0.0137488	0.00104428	-0.000467204	-1.03591e-05	0	0.00218847	0.0689701	0.056372	0.544866	0	0.0132938	0.190632	0.257943	0.727838
AT1G64690	-0.197096	0.0110176	0.970977	-0.029482	-0.00973789	-0.00259292	0.000284668	1.53112e-31	0.729477	0.371972	0.577178	0.38107	1.76983e-31	0.882245	0.585207	0.82588	0.593054
AT1G64710	-1.1616e-05	-0.0118859	0.822112	-0.00456413	0.000272623	0.000508146	7.14764e-06	0	0.720181	0.867182	0.46475	0.883007	0	0.877269	0.943744	0.754167	0.946636
AT1G64720	-0.000744429	-0.000275919	0.99734	0.000648531	0.000134744	-7.0015e-05	-5.12392e-06	0	0.129926	0.0139221	0.00272761	0.00169719	0	0.324076	0.0575985	0.0313833	0.0118592
AT1G64750	-0.000536931	0.00120777	0.00349403	0.000109586	-0.000229356	-3.88831e-05	6.23857e-06	1.40998e-09	0.853156	0.00246305	0.228654	0.00570786	1.52267e-09	0.948233	0.0147455	0.544576	0.031409
AT1G64760	0.0164611	-0.0330983	0.875336	-0.0478312	0.00697861	0.00229103	-0.000153833	0	0.0167642	0.00638009	0.0357281	0.0435996	0	0.0714286	0.031605	0.195644	0.146526
AT1G64770	-0.053026	-0.00336184	0.894374	-0.00679101	0.00700446	-0.00269557	-0.000251675	0	0.582629	9.40953e-06	6.37575e-05	9.16677e-08	0	0.797002	0.000125824	0.00142165	2.26298e-06
AT1G64790	-0.0405707	0.022366	0.943421	-0.0784508	-0.000718497	0.00309455	-8.67825e-05	2.38002e-138	0.0424112	0.884492	0.142265	0.55592	3.25028e-138	0.149036	0.950704	0.436716	0.737074
AT1G64850	-0.000148918	-0.00191626	0.977697	-0.0044234	0.000394292	0.000131732	-1.14364e-05	0	0.222516	0.395388	0.505467	0.40805	0	0.455559	0.608493	0.781106	0.61865
AT1G64960	-0.0014043	-0.0594881	0.901639	0.0566967	0.00229732	-0.00269199	4.15471e-05	0	0.000135829	0.226884	0.000897365	0.463269	0	0.00116355	0.432771	0.0128403	0.662782
AT1G64970	-0.00556847	-0.0216756	0.956848	-0.0121827	0.00317441	-2.71528e-05	-6.73173e-05	0	0.0678534	0.00020018	0.940533	0.00812709	0	0.209386	0.00184305	0.990714	0.0412366
AT1G64990	-0.00967654	-0.0236731	0.951185	-0.0112101	0.00189225	0.000534242	-3.93813e-05	0	0.130602	0.0460987	0.186633	0.163582	0	0.32521	0.141816	0.492247	0.355232
AT1G65000	-0.16056	-0.157689	0.35876	0.0506028	0.0849591	-0.00842176	-0.00323374	0.126756	0.833709	0.00586773	0.521858	0.000432432	0.130788	0.939313	0.0294566	0.793203	0.00378737
AT1G65020	-0.0599602	-0.02715	0.956278	-0.0366268	0.00180191	-0.000294399	-2.87362e-05	0	0.00037513	0.171391	0.600229	0.464131	0	0.00287131	0.359285	0.839848	0.663488
AT1G65040	-0.00598386	-0.00964932	0.976576	0.0061543	-0.000303916	-0.000219206	2.79993e-05	0	0.199018	0.620082	0.401722	0.125323	0	0.428559	0.787793	0.706486	0.301941
AT1G65060	-0.0137368	-0.0842584	0.841351	-0.0859231	0.00746848	0.00365923	-0.000110131	5.86363e-184	0.00381536	0.0526297	0.0266251	0.33844	8.43725e-184	0.0209309	0.156703	0.161113	0.550248
AT1G65070	-0.0161553	0.0108786	0.568305	0.0984538	0.00713097	-0.00628874	-0.000290817	2.67955e-43	0.0198184	0.187198	0.0063757	0.0710376	3.18413e-43	0.0812818	0.380837	0.0594029	0.205785
AT1G65080	-0.184911	0.0198384	0.98898	-0.080546	-0.00234044	-0.00569964	4.25162e-05	1.35311e-79	0.13369	0.733402	0.0517426	0.835495	1.71326e-79	0.330402	0.864757	0.24575	0.920181
AT1G65230	0.0169088	0.0590363	0.963919	-0.0233575	0.000232055	0.00162289	-0.000149251	0	0.0588139	0.883345	0.0161029	0.00153855	0	0.18875	0.950059	0.115639	0.0109988
AT1G65260	-0.000390045	-0.00099471	0.997796	-2.55791e-05	5.40117e-05	2.29455e-05	-1.81413e-06	0	0.966231	0.484733	0.48635	0.430911	0	0.996928	0.685092	0.768301	0.637813
AT1G65295	0.000408468	-0.0038284	0.993731	-0.000250019	0.000314392	1.43495e-05	-5.10831e-06	0	0.84855	0.0605276	0.840771	0.306058	0	0.94663	0.173493	0.958656	0.520864
AT1G65370	-0.00401554	-0.0128885	0.9777	0.00216413	0.00107599	-0.000132404	-2.39027e-05	0	0.645976	0.0742415	0.606443	0.183216	0	0.838014	0.201369	0.842522	0.381813
AT1G65390	0.0478524	-0.000477043	0.866926	0.00101885	-0.00563795	0.00140397	0.000266431	1.79332e-85	0.982093	0.331667	0.57076	0.123646	2.29033e-85	1	0.547056	0.821958	0.299171
AT1G65410	-0.227495	-0.000402769	0.952116	-0.193057	0.00432475	-0.00204487	-0.000133939	0	8.8985e-23	0.0854237	0.0564781	0.0737993	0	5.02905e-21	0.222627	0.258276	0.211611
AT1G65430	-0.117764	-0.0209474	0.789175	-0.0961992	0.00709749	-0.00226492	-0.000190021	1.73385e-266	3.41336e-05	0.0168633	0.0737097	0.0317732	2.68073e-266	0.000343862	0.0666668	0.303137	0.115572
AT1G65440	-0.0352323	-0.0105548	0.96718	-0.0400634	0.000273385	0.000400551	5.21548e-06	0	6.9633e-14	0.689595	0.169942	0.79816	0	2.18022e-12	0.837505	0.473525	0.89957
AT1G65450	0.00523755	0.00535292	0.99377	-0.00484835	0.000890856	0.000533931	-5.10589e-05	0	0.467747	0.265318	0.267219	0.0879151	0	0.714218	0.479226	0.588825	0.237738
AT1G65470	-0.0692066	-0.016142	0.953779	-0.0270896	0.00211843	-0.000385772	-6.02706e-05	6.66342e-117	0.524558	0.697319	0.868074	0.710352	8.85107e-117	0.754974	0.841096	0.966024	0.84951
AT1G65490	-0.172717	-0.115661	0.0517807	0.00116371	0.00644156	-0.00207901	-0.000221398	0.541335	0.989324	0.562657	0.661258	0.504276	0.551711	1	0.745618	0.875236	0.696178
AT1G65540	-0.468632	0.00234005	0.801777	-0.41536	-0.00381191	-0.00104832	9.90809e-05	0	8.98432e-123	0.0909744	0.275644	0.14034	0	6.72776e-120	0.233038	0.597997	0.321865
AT1G65560	0.012258	-0.0390462	0.928554	0.0488699	0.00262206	-0.00187054	-1.19881e-05	0	2.44868e-07	0.0304207	0.00029301	0.73978	0	3.43809e-06	0.104137	0.00518306	0.868408
AT1G65580	0.0119853	-0.00818553	0.950553	0.0289475	-0.00207132	-0.000632814	0.000103255	0	1.36526e-06	0.00690685	0.0529346	6.20023e-06	0	1.73036e-05	0.0336747	0.248413	9.87859e-05
AT1G65590	-0.0938964	-0.0667433	0.674342	-0.0343218	0.00772449	-0.000515045	-0.000258714	2.29156e-79	0.349358	0.0997186	0.796854	0.0642445	2.90069e-79	0.604881	0.248013	0.941037	0.191995
AT1G65650	0.000567907	-0.00195382	0.986252	0.000896604	0.000540164	-0.00010436	-1.15248e-05	0	0.73534	0.111445	0.470784	0.254374	0	0.885522	0.268628	0.757723	0.466677
AT1G65700	0.000479653	0.000434893	0.000196283	-0.000138854	1.52143e-05	1.65591e-05	-9.85088e-07	0.621079	0.733206	0.770348	0.456197	0.525849	0.63198	0.88473	0.887158	0.74943	0.714329
AT1G65800	-0.0364465	-0.0239831	0.919259	-0.0297934	-0.000745773	0.000136346	5.35511e-05	0	0.154888	0.780779	0.905017	0.502412	0	0.364448	0.893871	0.98146	0.694993
AT1G65820	-0.0010673	-0.0131909	0.972125	0.00258765	0.0012367	-0.000118813	-1.82225e-05	0	0.035829	4.4958e-15	0.0773134	0.000105658	0	0.130931	3.18104e-13	0.311123	0.00114666
AT1G65920	-0.0198681	-0.0156491	0.977038	0.00862546	0.000428013	-0.000899666	1.57563e-05	0	0.44764	0.768365	0.146551	0.715952	0	0.696657	0.886681	0.443138	0.853142
AT1G65930	-0.000201213	0	1.00006	2.06782e-05	-1.59912e-05	-3.36901e-06	5.26408e-07	0	0.746786	0.0509818	0.334908	0.0310693	0	0.891895	0.152759	0.65738	0.113584
AT1G65950	-0.0408638	0.00899152	0.0765773	-0.0704306	0.0120556	0.00130096	-0.000487365	0.100348	0.140717	0.0487407	0.617931	0.00749451	0.103754	0.341292	0.147968	0.850548	0.0386373
AT1G65960	-0.00134995	-0.0966552	0.842362	-0.0219162	0.0142299	0.000875166	-0.000320188	0	0.00666597	3.93817e-43	0.0470439	2.53942e-25	0	0.0332226	7.07768e-40	0.233427	7.60641e-23
AT1G65980	-3.78078e-06	0.00023359	0.999578	0.000171374	-7.20099e-06	-9.67028e-06	-3.68216e-07	0	0.339726	0.753863	0.3234	0.590508	0	0.594388	0.878034	0.645348	0.764157
AT1G66070	0.0255602	0.0142409	0.966263	-0.00323259	0.00224406	0.000668675	-0.000100774	0	0.678568	0.0245383	0.116102	0.000701523	0	0.854409	0.0886973	0.39247	0.00569457
AT1G66130	0.00494406	-0.0124671	0.952535	0.0252221	-0.000334076	-0.000945302	4.78771e-05	0	0.000177339	0.697905	0.0100018	0.0619109	0	0.00148377	0.841096	0.0829113	0.187161
AT1G66200	-8.52223e-05	-5.5719e-05	0.999948	6.41426e-05	-9.71071e-06	-4.15707e-06	4.40395e-07	0	0.358898	0.277641	0.275741	0.0984487	0	0.615469	0.493225	0.597997	0.256721
AT1G66240	-0.00630693	-0.0122609	0.970844	-0.00626715	0.00106219	3.31382e-05	-1.60304e-05	0	0.0472207	0.00857271	0.847486	0.183046	0	0.16134	0.0398316	0.960952	0.381636
AT1G66260	-0.0301039	0.11713	0.757758	-0.0302408	-0.0310432	0.000763505	0.00102655	7.10251e-204	0.235939	1.91842e-21	0.583347	4.87305e-26	1.04184e-203	0.474095	3.31518e-19	0.829423	1.62182e-23
AT1G66270	0	-0.000972463	0.998454	0.00121876	0.000167277	-7.84855e-05	-4.08779e-06	0	0.0981411	0.0760169	0.0508966	0.145615	0	0.27189	0.205008	0.243459	0.329312
AT1G66410	0.00166829	0.000615449	0.992071	0.00170534	-9.51992e-06	5.7419e-05	-1.49093e-06	0	0.104111	0.943467	0.315826	0.709347	0	0.281756	0.982728	0.639625	0.849239
AT1G66510	0.0360401	0.0132526	0.973945	0.0263057	-0.00244347	-2.21464e-05	8.92768e-05	0	0.032347	0.120246	0.973654	0.0567447	0	0.121222	0.282788	1	0.176683
AT1G66520	-0.386499	0.0476938	0.99996	-0.0172966	-0.0070556	-0.0163995	0.000131546	1.20628e-95	0.726436	0.264637	1.19733e-09	0.485172	1.56145e-95	0.881089	0.478379	8.53905e-08	0.68182
AT1G66530	-0.0140125	-0.00518301	0.986542	-0.00835148	0.000325844	0.000503259	-1.64845e-05	0	0.37502	0.786754	0.327143	0.645998	0	0.630372	0.89647	0.649658	0.805124
AT1G66540	-0.0687062	-0.100449	0.761927	-0.0460492	0.00697247	0.000228397	-3.39652e-05	4.9203e-59	0.342069	0.26711	0.93085	0.856217	6.01467e-59	0.596861	0.481013	0.988725	0.93183
AT1G66590	0.0113339	0.141516	0.17269	-0.0923033	-0.00729804	0.00434752	3.31371e-05	3.01962e-08	0.00371348	0.0758504	0.0124283	0.786956	3.24689e-08	0.0204971	0.204736	0.0969449	0.8942
AT1G66660	-0.00240779	-0.0308496	0.956648	0.0186532	0.00143032	-0.000874612	6.7843e-06	0	0.0428763	0.224901	0.081796	0.846807	0	0.150209	0.430398	0.321953	0.925647
AT1G66670	0.00932705	-0.0122666	0.966107	0.0123422	0.00131724	-0.000225215	-2.36499e-05	0	6.50544e-10	2.55954e-07	0.0387972	0.00190122	0	1.29998e-08	5.03553e-06	0.204389	0.0130216
AT1G66680	0.00315012	-0.0101862	0.954436	-0.00677666	-0.00105669	0.000556841	7.17576e-05	0	0.231864	0.145083	0.0717377	0.000897111	0	0.467824	0.321111	0.297953	0.00702216
AT1G66730	-0.00396057	-0.0868888	-0.0299404	0.000542728	0.00539892	-0.00012382	-4.86524e-05	0.386275	0.987786	0.233938	0.948955	0.718854	0.395563	1	0.441353	0.993847	0.854787
AT1G66740	0.000361993	-0.0150847	0.954125	0.00126941	0.00160098	-0.000159852	-3.17569e-05	0	0.847103	0.0573391	0.656267	0.205741	0	0.94663	0.166443	0.875236	0.410193
AT1G66750	-0.00886794	0.0226256	0.880198	0.0346627	-0.00222637	-0.00156745	4.8296e-06	1.60188e-157	0.304672	0.606338	0.394863	0.970073	2.23516e-157	0.557481	0.777136	0.701685	0.992381
AT1G66760	-0.525002	-0.0166378	0.91855	-0.403529	-0.0059221	-0.00317911	0.000166625	0	4.36926e-75	0.0354552	0.00810324	0.0470356	0	1.40222e-72	0.117016	0.0711126	0.154765
AT1G66900	-0.0104678	0.00163319	0.9916	-0.0043929	-0.000648532	0.000102575	8.29886e-06	0	0.388935	0.320153	0.712309	0.669412	0	0.641148	0.537901	0.901269	0.823402
AT1G66910	0.0489911	0.0187402	0.925847	0.0387647	-0.00198517	0.000541617	1.79909e-05	0	0.032922	0.393225	0.584867	0.795106	0	0.122643	0.606405	0.830341	0.898168
AT1G66920	0.0260145	-0.0106332	0.913793	0.0444769	-0.00305242	-0.00154981	0.00015907	0	0.0303966	0.245533	0.166737	0.0422483	0	0.115543	0.455612	0.473151	0.143379
AT1G66940	-0.0472128	0.0467833	0.966937	-0.0253739	-0.00444415	-0.00090056	5.80847e-05	0	0.0218338	0.0016932	0.13572	0.168487	0	0.0877525	0.0108635	0.426875	0.362553
AT1G66970	-0.000246461	-0.000528447	0.999539	-0.000725672	6.61224e-06	6.12444e-05	-1.42326e-06	0	0.350562	0.946993	0.148699	0.631029	0	0.605842	0.984233	0.447095	0.794623
AT1G66980	-0.15149	-0.0312323	0.750216	0.0643523	0.0177342	-0.0102736	-0.000659862	3.65371e-59	0.17504	0.00348739	7.22718e-05	0.00026439	4.4688e-59	0.394711	0.019346	0.0015763	0.00251143
AT1G67060	-0.0845941	0.000264713	0.835093	-0.0324888	0.00191732	-0.00237384	-9.66379e-05	0	0.114382	0.466464	0.0344698	0.217986	0	0.300262	0.671631	0.190632	0.424865
AT1G67070	-0.0739027	-0.0273806	0.903416	0.121842	-0.00466176	-0.00612278	0.000119024	2.27329e-63	0.027165	0.508844	0.0418605	0.571325	2.79947e-63	0.105263	0.703133	0.215564	0.748823
AT1G67080	0.0405633	0.0638985	0.937121	0.012415	-0.00362594	0.00237727	-2.11355e-05	0	0.528353	0.150056	0.0268908	0.778266	0	0.757826	0.328639	0.162017	0.889079
AT1G67090	0.000182629	-0.00048998	0.998484	0.000377682	4.03287e-07	-9.25344e-06	9.0255e-07	0	0.00320393	0.980375	0.185597	0.0646481	0	0.0183029	0.99963	0.491245	0.192935
AT1G67110	0.0263293	0.0783289	0.932017	-0.026299	-0.0100412	0.00223171	0.000265538	8.12499e-115	0.531037	0.0615667	0.329859	0.0970823	1.07559e-114	0.759977	0.17564	0.652745	0.254401
AT1G67140	0.0386284	0.0985993	0.836653	-0.0130368	0.00225048	0.000341358	-0.000245909	1.19884e-74	0.781283	0.707947	0.893987	0.169497	1.50436e-74	0.910067	0.847484	0.977776	0.363422
AT1G67210	0.0135122	0.0292952	0.94643	-0.0364252	-0.0001983	0.00162588	-6.28962e-05	1.23507e-175	0.289146	0.964024	0.385786	0.631133	1.76333e-175	0.543003	0.991953	0.695758	0.794642
AT1G67250	-0.0163954	-0.0145134	0.969632	-0.0296203	0.000695228	0.000778494	4.37194e-06	0	7.15996e-12	0.208584	0.000959203	0.790706	0	1.8175e-10	0.408465	0.0135525	0.895656
AT1G67280	0.000447729	-0.000294731	0.99909	0.000688854	6.97483e-05	-2.30647e-05	-2.00927e-06	0	0.0842603	0.171834	0.289315	0.186496	0	0.243315	0.359929	0.613156	0.386052
AT1G67300	0.0203753	0.340731	0.659403	-0.0743653	-0.0435451	0.00446122	0.000956414	1.03508e-133	0.00682715	3.31857e-35	0.0029326	7.07693e-20	1.40396e-133	0.0339318	1.86379e-32	0.0332312	1.11567e-17
AT1G67310	0.236363	0.00663957	0.0571329	0.301556	-0.00415312	-0.00232209	0.000121586	0.107423	1.20413e-16	0.372611	0.242361	0.38101	0.111005	4.76665e-15	0.585714	0.562747	0.593054
AT1G67340	0.017393	-0.0198554	0.907148	-0.00784274	0.00203428	0.000435599	-1.31081e-05	0	0.419027	0.101353	0.41066	0.723111	0	0.670288	0.251036	0.714107	0.857142
AT1G67410	0.00510389	-0.011558	0.931535	-0.0178232	0.00393722	0.000580195	-0.000118489	0	0.036558	0.000306481	0.212211	0.000266403	0	0.132937	0.00262039	0.526776	0.00252788
AT1G67420	-0.161755	-0.0800089	0.207258	-0.147518	-0.00125146	0.00414098	0.000117394	0.0124286	0.0828652	0.908448	0.372188	0.717321	0.0129743	0.241058	0.963905	0.689145	0.853868
AT1G67430	0.000911363	-0.0052256	0.986622	0.00227519	0.000723675	-0.000120204	-1.51517e-05	0	0.0317081	9.28062e-08	0.0375012	0.00017504	0	0.119467	1.98089e-06	0.201689	0.00177329
AT1G67440	-0.0353253	0.000767589	1.0021	-0.00369076	-0.000306704	-0.000927342	3.94565e-06	0	0.557964	0.70355	0.00696895	0.869495	0	0.780069	0.844184	0.0635534	0.939548
AT1G67490	0.0568692	0.0296178	0.836368	0.0443511	3.62535e-05	0.00162308	-0.000153842	1.07161e-165	0.156172	0.992771	0.34147	0.196936	1.51288e-165	0.366005	1	0.662519	0.399204
AT1G67500	0.0933894	-0.442794	0.111204	0.218516	0.0438569	-0.0102763	-0.000855892	0.347819	0.0707969	0.00519595	0.126286	0.0677166	0.35667	0.216094	0.0266045	0.409837	0.199312
AT1G67530	-0.0266365	-0.035995	0.916824	0.0227834	0.00172053	-0.00111884	-6.53053e-06	0	0.106243	0.340372	0.145936	0.903329	0	0.285837	0.557119	0.441989	0.956487
AT1G67550	-0.103784	0.0279551	0.896548	-0.0688536	0.00690593	0.00117434	-0.000505166	6.37024e-64	0.206375	0.321888	0.692811	0.0150188	7.85118e-64	0.437896	0.539945	0.892943	0.0669109
AT1G67580	0.00569571	-0.0488004	0.902441	0.0159118	0.00242058	-0.000239067	1.73967e-05	0	0.111057	0.0581387	0.660774	0.647666	0	0.294905	0.168256	0.875236	0.806368
AT1G67590	0.000267178	-0.0301002	0.926094	0.0208463	0.000728649	-0.00100809	3.83426e-05	0	0.0247426	0.539586	0.0465511	0.278641	0	0.0971328	0.72641	0.231878	0.492693
AT1G67600	0.0119708	-0.0882289	0.786176	0.127987	-0.00202141	-0.00285753	0.000240761	2.18875e-71	0.00458227	0.726358	0.245946	0.161818	2.73282e-71	0.0243935	0.860177	0.566182	0.353296
AT1G67630	-0.000633862	0.00772869	0.906798	-0.00845975	0.00593724	-0.000551788	-0.000229888	0	0.65352	0.0138045	0.591492	0.00137528	0	0.843755	0.0572737	0.833692	0.0100392
AT1G67650	0.0580454	0.0461043	0.960598	-0.103109	0.00370491	0.00591872	-0.000158234	4.96983e-75	0.0545935	0.593911	0.0421777	0.445655	6.24338e-75	0.178782	0.768611	0.21622	0.648843
AT1G67660	0.019521	0.0077375	0.935941	-0.0109731	-0.000299074	0.0014238	-2.21843e-05	0	0.537836	0.895582	0.142832	0.743869	0	0.764956	0.956465	0.437094	0.870726
AT1G67690	-0.319809	0.00661829	0.60987	-0.130282	0.0112531	-0.00828819	-0.000415374	9.75998e-22	0.0460728	0.178091	0.0200136	0.0952579	1.09739e-21	0.158261	0.369078	0.132921	0.251304
AT1G67710	-0.458078	-0.309763	0.276333	-0.154545	0.0168028	-0.0122093	-5.22387e-05	0.00824186	0.156897	0.196095	0.0291632	0.889522	0.0086198	0.366869	0.392365	0.170808	0.949497
AT1G67720	-0.256584	-0.104577	0.707917	-0.300971	0.00328045	0.00135657	0.000151494	6.53773e-76	2.15657e-14	0.515082	0.527846	0.313017	8.22456e-76	7.15089e-13	0.708159	0.797877	0.526188
AT1G67730	-0.00950366	-0.0139117	0.942384	0.00278932	0.000522115	-0.000444536	1.23435e-05	0	0.606905	0.451613	0.132837	0.550339	0	0.813491	0.659833	0.421817	0.732458
AT1G67800	0.0183225	-0.054077	0.864718	0.0239381	0.00651293	0.00080397	-0.000172363	0	0.0393175	1.17328e-05	0.204541	9.9189e-05	0	0.140704	0.000152356	0.519195	0.00109096
AT1G67830	-0.0063524	0.000693328	0.9878	-0.00554011	0.000416583	0.000239486	-2.22639e-05	0	0.438316	0.648744	0.539134	0.413907	0	0.688104	0.810118	0.806012	0.623166
AT1G67840	-0.025769	0.0735828	0.94597	0.015444	-0.00449678	-0.00095086	-6.14538e-06	0	0.376597	0.0441988	0.31835	0.926466	0	0.632112	0.137429	0.641914	0.970871
AT1G67850	-0.0176197	0.0223895	1.01002	-0.00824194	-0.00442977	-9.03152e-05	0.00013271	0	0.568004	0.0164547	0.908689	0.0158746	0	0.78666	0.0654834	0.981818	0.0697891
AT1G67880	0.0133005	0.0243575	0.868516	-0.00293986	-0.00164809	0.00135251	1.13036e-05	3.70217e-204	0.919871	0.659372	0.396253	0.919183	5.43501e-204	0.979852	0.816978	0.702672	0.966848
AT1G67890	0.0295128	0.0115534	0.914295	0.00790244	-0.000542625	0.000294335	1.64498e-05	0	0.563735	0.756686	0.693475	0.752582	0	0.784187	0.879522	0.893094	0.876224
AT1G67900	-0.00598749	0.0270445	0.927878	-0.00249926	-0.00294528	0.000218524	3.72713e-05	0	0.919988	0.354845	0.872099	0.694351	0	0.979852	0.570568	0.967731	0.839487
AT1G67930	0.0108684	0.0366491	0.947781	-0.00715801	0.00273249	0.000686886	-0.00020752	0	0.631009	0.151832	0.398193	0.000259446	0	0.82891	0.331116	0.704018	0.00247734
AT1G67950	-0.00591032	-0.00364145	0.991802	-0.00424179	7.38099e-05	-8.84824e-05	8.86997e-07	0	0.563863	0.937438	0.825351	0.974746	0	0.784187	0.979172	0.951947	0.99413
AT1G67960	0.0140914	0.0335187	0.877279	0.0118341	-0.00135543	0.000708176	-5.03752e-05	0	0.49879	0.544831	0.458116	0.450071	0	0.736586	0.73076	0.751179	0.652734
AT1G67980	0.00281494	-0.113012	0.78811	-0.018457	0.0187743	0.000160057	-0.000461169	1.13471e-137	0.568584	5.81952e-06	0.927788	0.000186282	1.54727e-137	0.786893	8.2483e-05	0.988219	0.00187039
AT1G68000	0.00064195	0.000645832	0.999846	-1.47719e-05	-1.55976e-06	2.65613e-05	-1.73138e-06	0	0.985487	0.988022	0.548807	0.575967	0	1	1	0.810267	0.75293
AT1G68010	0.00237736	0.00332567	0.996132	0.00183911	-0.000292588	-1.73064e-05	6.25532e-06	0	0.00536468	0.000535827	0.631039	0.0129838	0	0.0279028	0.00421623	0.85969	0.0597705
AT1G68020	0.054668	-0.0134504	0.843799	0.0550878	-0.0022224	-3.67903e-05	0.000129712	0	0.0103834	0.419028	0.974972	0.113428	0	0.0488252	0.629147	1	0.282526
AT1G68060	0.000953821	0.00131808	1.00051	4.76911e-05	-0.000121622	1.19228e-05	3.28581e-06	0	0.946403	0.180256	0.758034	0.224371	0	0.987451	0.372001	0.922157	0.431726
AT1G68070	0.00167028	-0.02925	0.924865	0.0131058	0.00119913	-0.000299117	8.00975e-06	0	0.0266548	0.112935	0.353768	0.722322	0	0.103464	0.271129	0.673795	0.856757
AT1G68080	-0.0616005	-0.226182	0.106484	-0.0939793	0.0202279	-1.93735e-05	-0.000240021	0.190424	0.259997	0.0580985	0.996604	0.450461	0.19603	0.506836	0.168194	1	0.652979
AT1G68100	-0.538973	0.042987	0.909515	-0.394343	-0.00461822	-0.00427022	1.13929e-05	6.02639e-151	1.96753e-28	0.311369	0.0281436	0.933201	8.34923e-151	1.41442e-26	0.529732	0.166162	0.973728
AT1G68130	0.00365035	-0.0475537	0.757703	-0.0303364	0.00683965	0.00189487	-0.000131324	1.15393e-156	0.298014	0.0666635	0.233438	0.23729	1.60838e-156	0.551474	0.186152	0.550591	0.448148
AT1G68160	-0.0235343	0.00268714	0.941722	-0.023711	0.0014445	-8.2275e-05	-6.32084e-05	0	0.022307	0.276561	0.884441	0.110053	0	0.0892083	0.492212	0.973372	0.276989
AT1G68185	-0.00754333	-0.0062235	0.992425	-0.00233248	0.000454578	-2.17327e-05	-8.22249e-06	0	0.671409	0.518152	0.942242	0.694845	0	0.851918	0.710857	0.991109	0.839487
AT1G68190	0.0243124	0.0496287	0.846415	0.0383327	-0.00359618	9.13619e-05	-1.97683e-06	0	0.00312563	0.0302446	0.897276	0.968112	0	0.0179103	0.103732	0.978866	0.991504
AT1G68220	-0.0139607	-0.0400509	0.915921	-0.0342681	0.00511655	0.00140426	-0.000102163	0	2.27873e-05	7.68999e-07	0.00146457	0.00092457	0	0.000236725	1.396e-05	0.0191566	0.00720571
AT1G68230	-0.00373106	0.048886	0.976779	0.0118806	0.00125347	-0.00160878	-0.000120461	2.53317e-290	0.66594	0.721827	0.283895	0.250848	3.98095e-290	0.849231	0.857467	0.607212	0.464096
AT1G68260	-0.00693553	0.00377524	0.988709	-0.000447877	-0.00035374	1.46586e-05	-5.42841e-06	0	0.961036	0.762967	0.976618	0.876563	0	0.994975	0.883367	1	0.942345
AT1G68310	0.00404844	-0.0446555	0.890312	0.00961655	0.00412129	-0.000231872	-5.74289e-05	0	0.210533	2.73913e-05	0.57999	0.049822	0	0.443055	0.000320911	0.827268	0.161043
AT1G68340	-0.0212696	-0.0225865	0.972743	0.00806202	-0.00105781	-0.000301723	4.39964e-05	0	0.664835	0.656817	0.766303	0.535115	0	0.848874	0.816138	0.926036	0.719842
AT1G68370	-0.013906	-0.000431726	0.967303	0.0017055	-0.00148678	-0.000498061	4.84105e-05	0	0.803571	0.0901224	0.183041	0.0640225	0	0.923462	0.231515	0.488048	0.191704
AT1G68410	-0.0332379	-0.0203262	0.931803	-0.0689659	0.00069267	0.00183924	1.40952e-05	0	1.56417e-10	0.615434	0.00175926	0.731546	0	3.37875e-09	0.784036	0.0221721	0.86246
AT1G68490	0.0234102	-0.0134387	0.894173	0.0348371	-1.24912e-05	-0.000658238	3.53774e-05	0	6.39803e-06	0.989909	0.118056	0.2293	0	7.35201e-05	1	0.394838	0.437751
AT1G68530	0.0024693	-0.00877298	0.95466	0.00934548	0.000648327	-0.000222028	-7.85415e-06	0	0.000989265	0.0741222	0.151485	0.467776	0	0.0066439	0.201251	0.450774	0.665943
AT1G68540	-0.0146231	-0.09304	0.782035	0.0222774	0.00814895	-0.000527926	-0.000139101	6.93512e-239	0.359427	0.00878751	0.690558	0.133328	1.05198e-238	0.615672	0.0404802	0.891597	0.312477
AT1G68560	-0.000473661	-2.64316e-05	0.99689	-0.000629754	-1.18112e-06	-4.16286e-06	5.62957e-07	0	0.423529	0.990639	0.922748	0.851134	0	0.67498	1	0.985989	0.928529
AT1G68580	-0.113505	0.135662	0.950218	-0.00253719	-0.00940475	-0.00358514	2.87244e-05	0	0.89968	0.000259798	0.00109359	0.708111	0	0.971698	0.00229326	0.0152121	0.849053
AT1G68600	0.0124247	-0.0384266	0.908583	0.0355174	0.000534278	-0.00112454	6.35729e-05	0	0.0298326	0.798408	0.207404	0.307744	0	0.113644	0.902598	0.52221	0.520864
AT1G68660	0.00988553	0.00256498	0.948121	0.025665	-0.00280807	-0.000617821	0.000111254	0	2.52075e-05	0.000314818	0.0630292	1.66233e-06	0	0.000260063	0.00268148	0.276283	2.9463e-05
AT1G68710	-0.119083	0.0219374	0.557857	-0.0564467	0.0103542	-0.00235151	-0.000487875	4.49425e-45	0.164675	0.0463501	0.288661	0.00163034	5.36184e-45	0.378428	0.142391	0.612348	0.0114994
AT1G68730	-0.00890624	0.00508026	0.963885	0.00645221	-0.0015946	-0.000283358	4.95262e-05	0	0.363768	0.07937	0.464713	0.067442	0	0.6198	0.211952	0.754167	0.198635
AT1G68740	-0.0252822	-0.0120528	0.938255	0.019512	0.00340793	-0.00156843	-0.000115646	0	0.260557	0.124567	0.0973708	0.080254	0	0.507448	0.289241	0.35617	0.223964
AT1G68820	-0.106964	-0.0536514	0.653311	-0.119606	0.0018208	0.00124536	6.44185e-05	1.90244e-84	0.000511144	0.679269	0.5072	0.623469	2.42625e-84	0.00375257	0.831036	0.782065	0.790055
AT1G68872	-0.103593	0.135532	0.826678	-0.10216	0.00788469	-0.00187608	-0.000583181	2.93517e-99	0.0108542	0.124372	0.391171	0.000136408	3.81644e-99	0.0505631	0.289111	0.699653	0.00143029
AT1G68890	0.044569	0.111603	0.577699	-0.0560242	-0.0108745	0.00372179	0.000203071	3.31588e-32	0.264101	0.0902171	0.173867	0.288305	3.83975e-32	0.510864	0.231596	0.477219	0.503441
AT1G68910	0.0126641	0.00360562	0.982548	0.00201875	-0.000628177	0.000385984	2.10059e-05	0	0.732216	0.405281	0.23043	0.350303	0	0.884367	0.617959	0.546971	0.5623
AT1G68980	-0.0222957	0.0644313	1.01612	-0.0152988	-0.00623025	0.00133811	4.47194e-05	2.71392e-190	0.665869	0.169287	0.488732	0.740556	3.93026e-190	0.849231	0.357092	0.769671	0.868808
AT1G69010	-0.00812572	-0.00962363	0.981156	0.00328891	0.000561796	-0.000454575	-2.6559e-06	0	0.447192	0.310192	0.0541374	0.872081	0	0.696562	0.528615	0.25167	0.940646
AT1G69020	0.362007	0.0276581	0.540025	0.221685	0.017638	0.00365283	-0.000751146	1.1937e-11	0.00640539	0.0945919	0.418901	0.0170942	1.29798e-11	0.0321607	0.239437	0.720567	0.0734042
AT1G69030	0.0252637	0.0122066	0.980531	0.0143865	-0.000458314	0.000198091	6.36107e-06	0	0.0459722	0.61925	0.614479	0.81695	0	0.158036	0.786958	0.848319	0.910921
AT1G69040	0.0419933	0.0550176	0.959373	0.0118103	-0.00224927	7.57451e-05	1.04947e-06	0	0.485044	0.298648	0.934581	0.987015	0	0.727392	0.515591	0.989176	1
AT1G69070	-0.0290807	-0.00236101	0.99215	-0.0118802	-0.000984184	-0.000376355	3.84343e-05	0	0.198732	0.405325	0.455496	0.275422	0	0.428045	0.617959	0.749101	0.489215
AT1G69080	0.0629287	-0.0282178	0.607633	-0.0978632	0.00902805	0.00560787	-0.00025869	2.79978e-55	0.0139475	0.0762662	0.00980906	0.0882226	3.40029e-55	0.0616184	0.205483	0.0817649	0.23814
AT1G69170	0.00983334	0.136072	0.81283	0.0240234	-0.000604568	-0.00177906	-0.000272768	1.24184e-46	0.67953	0.935238	0.574952	0.218539	1.48551e-46	0.855029	0.977588	0.824269	0.425134
AT1G69210	-0.0731633	-0.127785	0.767985	-0.04946	0.0094763	0.00305368	-0.000229141	1.5816e-81	0.22992	0.0721977	0.174241	0.144552	2.0088e-81	0.465225	0.197434	0.477219	0.327796
AT1G69220	-0.0275285	0.0220532	0.895288	0.0202137	0.00154991	-0.00202223	-0.000127758	0	0.195972	0.438355	0.017724	0.0320375	0	0.423352	0.648404	0.122936	0.116188
AT1G69250	0.0147612	-0.0672009	0.713078	0.0412474	0.0102071	0.00044885	-0.000287854	2.23419e-224	0.0713845	0.000487817	0.719112	0.000964301	3.3444e-224	0.217126	0.00389558	0.904733	0.00744434
AT1G69295	0.00418197	-0.00508593	0.957612	0.00624155	0.000841674	-2.77731e-05	-1.95297e-05	0	0.143889	0.123468	0.905114	0.230307	0	0.346181	0.287506	0.98146	0.439299
AT1G69310	-0.0697377	-0.232588	0.395833	-0.0185425	0.0214787	-0.00137808	-0.000352176	9.58375e-86	0.37021	4.94374e-16	0.222186	8.02553e-06	1.22468e-85	0.626027	4.2309e-14	0.53758	0.000122858
AT1G69340	0.0125351	0.00374903	0.969834	0.010164	-0.00371294	0.000151855	0.000141607	0	0.176529	0.000113895	0.711284	7.8351e-07	0	0.396473	0.00112099	0.900859	1.4885e-05
AT1G69360	-0.00459853	-0.0193247	0.969404	-0.0067024	0.00154632	0.000267377	-1.871e-05	0	0.155732	0.0104717	0.299244	0.29856	0	0.365689	0.0463417	0.62303	0.51386
AT1G69370	-0.01262	-0.162804	0.718371	-0.129571	0.0183292	0.00500169	-0.000346191	0	2.06929e-12	7.69112e-15	6.55386e-07	8.35061e-07	0	5.60081e-11	5.31634e-13	2.88691e-05	1.58309e-05
AT1G69380	-0.0412296	0.0041485	0.968809	-0.0330339	0.00487557	0.00182871	-0.000306533	4.03555e-287	0.228765	0.165014	0.221979	0.0033935	6.32871e-287	0.463723	0.351046	0.53758	0.0209437
AT1G69400	-0.00153167	0	0.998953	-0.00396789	0.000190396	0.00015253	-5.94989e-06	0	0.103883	0.541898	0.251814	0.522358	0	0.281343	0.728591	0.573237	0.711886
AT1G69410	0.00196625	-0.0223949	0.948984	0.0109983	0.00151955	-0.000330214	-1.15309e-05	0	0.000713011	0.00025729	0.0625082	0.351943	0	0.00500165	0.00227559	0.274666	0.563937
AT1G69420	-0.00114584	-0.00715698	0.989727	0.00576208	0.000337795	-0.000110635	-4.29611e-06	0	0.122626	0.479317	0.586884	0.76269	0	0.313489	0.681227	0.831487	0.879689
AT1G69450	-0.00445942	-0.037053	0.938562	-0.00445632	0.00286811	-9.95987e-05	-2.9857e-05	0	0.514082	0.00102946	0.789226	0.251471	0	0.747596	0.00721026	0.93859	0.46439
AT1G69460	-0.0110825	-0.0123711	0.940638	-0.00181659	0.00132919	-0.000207409	-2.52282e-05	0	0.69874	0.0268717	0.417949	0.158558	0	0.866649	0.0948426	0.719703	0.348712
AT1G69480	-0.135373	0.200647	0.832421	0.0219798	-0.0122051	-0.0142424	0.000189183	5.3661e-15	0.838861	0.413494	0.0199961	0.678573	5.91654e-15	0.942368	0.62462	0.132903	0.829906
AT1G69490	-0.035427	-0.044248	0.803311	-0.141543	0.0109791	0.00420707	-0.000283523	2.0747e-216	6.93527e-08	0.00107721	0.00330132	0.00460133	3.0851e-216	1.06349e-06	0.007506	0.0360458	0.026573
AT1G69530	0.00205867	-0.00899333	0.0114677	0.00542528	-0.000452975	-0.000190387	4.10621e-05	0.00014831	0.0801971	0.253565	0.260417	0.000513548	0.000156993	0.235046	0.465482	0.582131	0.00437417
AT1G69550	-0.046611	0.0949455	0.858405	-0.0682343	-0.010366	0.000161098	0.000199868	9.64679e-167	0.0329686	0.0113389	0.92647	0.10131	1.36342e-166	0.122673	0.0492228	0.987575	0.26145
AT1G69580	-0.066985	-0.054792	0.849924	-0.0532954	0.0065372	-0.000869736	-0.000140078	1.56573e-280	0.0286979	0.0359671	0.51286	0.13148	2.44477e-280	0.110111	0.118129	0.78545	0.309938
AT1G69610	-0.105202	-0.309811	0.419517	-0.158489	0.0207272	0.00731807	-0.0002528	4.9225e-07	0.0655182	0.0587804	0.124896	0.443828	5.27092e-07	0.204005	0.16973	0.407225	0.647442
AT1G69620	-0.134317	0.00518574	0.987386	-0.127677	-0.0018885	0.000125143	5.11808e-05	0	7.15913e-207	0.000387645	0.581334	0.00124887	0	2.1444e-203	0.00318991	0.828133	0.00930542
AT1G69670	-0.000616015	0	1.00021	-3.08008e-05	-3.85009e-05	-7.70019e-06	1.20315e-06	0	0.923661	0.349168	0.660576	0.32615	0	0.979858	0.564739	0.875236	0.537462
AT1G69680	0.107769	0.0250178	0.913072	0.0730691	0.000501929	0.00169114	-8.9013e-05	0	0.000125004	0.836821	0.103643	0.220248	0	0.00108008	0.925612	0.367551	0.426174
AT1G69700	-0.00517959	-0.00072743	0.978517	-0.00884631	0.0012668	-0.000271497	-3.74209e-05	0	0.200795	0.152181	0.47172	0.155734	0	0.430426	0.331677	0.757849	0.345196
AT1G69780	-0.00251264	0.0115407	0.962775	-0.00501836	-0.00134218	0.000271582	1.94242e-05	0	0.660458	0.358467	0.663008	0.65558	0	0.84748	0.573165	0.876023	0.812446
AT1G69790	0.0064722	-0.0205104	0.955931	-0.0143572	0.00463467	0.00178766	-0.000158388	0	0.612344	0.0686298	0.174579	0.0378322	0	0.817126	0.189931	0.477253	0.131665
AT1G69800	-0.0637375	-0.0363517	0.0671948	-0.00642432	-0.00403926	0.000971479	0.000196774	0.188729	0.902511	0.547207	0.734213	0.325029	0.194307	0.972573	0.733035	0.912915	0.537462
AT1G69810	-0.00058086	-0.00987396	0.973446	0.00106682	0.000168631	-3.46908e-05	1.134e-05	0	0.861974	0.829921	0.917461	0.627821	0	0.951881	0.921497	0.985406	0.792586
AT1G69840	0.00405798	-0.00886463	0.979384	0.00937125	0.000575784	-0.000287662	2.50784e-06	0	0.0409339	0.326254	0.250057	0.885893	0	0.144823	0.544354	0.571177	0.947469
AT1G69870	-0.00143764	-0.00754849	0.976676	-0.00571302	0.00171277	0.000145782	-4.60739e-05	0	0.00892383	8.92516e-10	0.221281	3.16441e-08	0	0.0429051	2.76557e-08	0.537414	8.62569e-07
AT1G69935	0.0472281	0.109385	0.72377	0.0269467	-0.0169245	0.00127746	0.000461454	1.0706e-219	0.250879	1.73351e-08	0.318385	2.49588e-07	1.59675e-219	0.495363	4.25611e-07	0.641914	5.44369e-06
AT1G69960	-0.0305524	0.00211612	0.988445	-0.0389311	-0.000521449	0.000513196	1.34013e-05	0	4.3932e-19	0.350035	0.0310087	0.420205	0	2.03491e-17	0.56562	0.177646	0.627967
AT1G69980	0.0111632	-0.0155898	0.922528	0.016308	0.00225936	-0.000505473	-5.00281e-05	0	0.0667508	0.0471158	0.297586	0.140121	0	0.206337	0.144204	0.620832	0.321617
AT1G70000	0.00658198	-0.0331392	0.908881	0.0315363	0.00407689	-0.000937083	-9.60976e-05	0	0.0028305	0.00255528	0.103914	0.0170089	0	0.0164627	0.0151698	0.36766	0.0732487
AT1G70100	-0.156513	0.0795053	0.905658	-0.149203	-0.00525991	-0.000440753	3.42847e-05	0	2.99349e-28	0.00238923	0.550624	0.506447	0	2.13488e-26	0.0143995	0.810514	0.697756
AT1G70150	0.0216466	0.0735538	0.949102	-0.0826595	-0.00990412	0.00385115	0.000230342	5.40345e-147	0.0283878	0.0400999	0.0612187	0.109098	7.45744e-147	0.109248	0.128038	0.271059	0.275381
AT1G70180	-0.13544	-0.060056	0.736096	-0.066036	0.0142008	-0.00440051	-0.000395594	0	0.0004766	4.30372e-09	1.97778e-05	4.01894e-08	0	0.00354237	1.18629e-07	0.000525809	1.06847e-06
AT1G70200	-0.0185121	0.0284526	1.00924	-0.00567377	-0.00308513	-0.000891605	5.98981e-05	0	0.535562	0.00846239	0.074328	0.0862154	0	0.763001	0.0393801	0.304708	0.234412
AT1G70210	-0.229508	-0.236504	0.578216	-0.136332	0.018702	-0.0016344	-0.000224125	4.51371e-37	0.00345936	0.00171983	0.520562	0.207371	5.29369e-37	0.0193802	0.0109996	0.791903	0.411696
AT1G70250	0.124483	0.0625858	0.417251	0.121332	-0.00892748	0.000824201	0.000160351	1.38222e-20	0.00837561	0.12945	0.742689	0.360694	1.54929e-20	0.0406608	0.297332	0.91693	0.572447
AT1G70280	-0.0411224	0.0157923	0.972013	-0.0176047	-0.00151697	-0.000894565	1.95952e-05	0	0.17914	0.365583	0.210827	0.694874	0	0.400238	0.580219	0.525491	0.839487
AT1G70290	-0.00145929	0.012261	0.982059	0.00610389	-0.00117196	-0.00028109	1.85763e-05	0	0.051972	0.00354071	0.100912	0.120791	0	0.172032	0.0195917	0.362719	0.293974
AT1G70300	-0.0217144	-0.0192313	0.931194	0.0170646	0.00243082	-0.00209318	-5.08149e-05	0	0.0621333	0.0378163	2.73963e-05	0.14509	0	0.196526	0.122457	0.000695433	0.328823
AT1G70310	-0.00108415	-0.000225212	0.996717	-0.00103548	8.77446e-05	5.86704e-06	-2.96012e-06	0	0.0363845	0.165755	0.827945	0.116591	0	0.13243	0.351925	0.952934	0.287567
AT1G70360	0	0	0.00433605	0.0107219	-0.000788372	-0.000473023	2.46366e-05	0.483003	0.0908779	0.331194	0.171525	0.308136	0.492931	0.255916	0.546576	0.473525	0.520864
AT1G70410	0.128398	0.111599	0.867178	0.0831133	-0.00493793	0.0012215	-4.24652e-05	0	2.2192e-08	0.00938585	0.131811	0.453403	0	3.67928e-07	0.0425456	0.419976	0.655408
AT1G70430	0.000978264	-0.00276153	-0.00130734	0.00159386	0.000306032	-9.23344e-05	-7.28145e-06	0.589527	0.558364	0.365104	0.595946	0.522649	0.600214	0.7803	0.579959	0.837007	0.711918
AT1G70505	0.0952384	0.148474	0.610735	-0.305267	0.00726902	0.0155563	-0.000492475	2.10648e-12	0.000423951	0.512118	0.000821501	0.132366	2.30026e-12	0.00317999	0.705704	0.0119257	0.310803
AT1G70520	0.00379399	-0.0128051	0.969174	0.0054305	0.000914718	-9.58373e-05	-9.36524e-06	0	0.297536	0.170224	0.736123	0.637448	0	0.550929	0.358215	0.913772	0.798788
AT1G70530	-0.142454	-0.05199	0.876879	-0.0435848	0.00241654	-0.00394968	-1.20038e-05	0	0.00283048	0.195726	7.07311e-07	0.829223	0	0.0164627	0.391975	3.06953e-05	0.918018
AT1G70550	-0.0180688	0.00320515	0.824004	0.0141777	0.0044182	-0.0022451	-0.000185957	2.13726e-98	0.724018	0.389767	0.305401	0.224415	2.77655e-98	0.879626	0.60252	0.627878	0.431726
AT1G70560	-0.0023136	-0.0133642	0.980601	0.00481532	0.000975558	-0.000315621	-1.22185e-05	0	0.154011	0.0239905	0.0867689	0.342699	0	0.362953	0.0872081	0.332781	0.554445
AT1G70570	-0.15653	0.0355927	0.953479	-0.0166627	0.00318379	-0.00637932	-0.000205452	0	0.278959	0.105904	3.0114e-14	0.000462135	0	0.530637	0.259141	4.58651e-12	0.00400457
AT1G70590	-0.00352766	-0.242991	0.549626	0.0492075	0.0107274	-0.00229699	0.000132648	6.10931e-94	0.0727564	0.00223226	0.124699	0.204492	7.88768e-94	0.220057	0.0136271	0.407197	0.408348
AT1G70610	-0.424279	0.0793946	0.926592	-0.450053	0.00285463	0.000762582	-0.000248326	1.8374e-296	5.53173e-68	0.387719	0.588408	0.011675	2.90122e-296	1.50631e-65	0.601111	0.832143	0.0549277
AT1G70620	0.0617821	-0.0626209	0.164819	0.0366087	0.00418399	0.0003894	-2.47898e-05	0.000156957	0.413154	0.46476	0.873228	0.884421	0.000166107	0.664269	0.670863	0.968385	0.947151
AT1G70630	0.0290363	0.109361	0.552202	-0.00141225	-0.0252647	0.00761418	0.000629199	9.83483e-08	0.989448	0.0670058	0.213018	0.130716	1.05549e-07	1	0.186644	0.528029	0.308785
AT1G70650	-0.00128861	-0.00128861	-0.000385962	-5.91393e-05	9.72686e-05	-1.63411e-05	-2.52898e-06	0.585362	0.932919	0.276893	0.666463	0.335274	0.596041	0.982652	0.492511	0.8771	0.547478
AT1G70670	-0.00225059	-0.0049465	0.981288	0.00296857	0.000177994	-0.000243221	3.32798e-06	0	0.507921	0.756346	0.320058	0.845624	0	0.74331	0.879354	0.644131	0.925348
AT1G70690	-0.0122012	0.00669454	0.991475	-0.0207481	-0.00267707	0.000748812	6.70054e-05	0	0.0323733	0.0309335	0.156901	0.0698732	0	0.121222	0.105371	0.459255	0.203589
AT1G70730	-0.000155779	-0.00105315	0.995396	-0.0036186	0.000393815	0.000259204	-1.80683e-05	0	0.121795	0.188119	0.0421925	0.0426975	0	0.311719	0.38176	0.21622	0.144512
AT1G70740	-0.0883345	-0.12011	0.706261	0.165195	0.0130682	-0.0137198	-0.00019229	5.65049e-78	2.02688e-05	0.00840906	8.68443e-11	0.193133	7.13136e-78	0.000213274	0.0392539	7.2933e-09	0.39451
AT1G70790	0	0	0.999348	0.000664252	0.000118616	-7.11699e-05	-3.70677e-06	0	0.4863	0.331194	0.171525	0.308136	0	0.727392	0.546576	0.473525	0.520864
AT1G70800	-0.263549	-0.0407548	0.911114	-0.360024	-0.00761446	0.0088659	0.000357365	5.12993e-13	0.00509366	0.657944	0.230647	0.49058	5.61412e-13	0.0266602	0.816227	0.547032	0.686018
AT1G70820	-0.00104646	-0.0125945	0.979526	0.00837999	0.00195001	-0.000480633	-5.18569e-05	0	0.095441	0.0024247	0.0796093	0.00679699	0	0.265933	0.0145449	0.317106	0.0360341
AT1G70830	-0.000366074	-0.000877105	0.998136	-0.00123129	0.00015362	4.9662e-05	-4.48401e-06	0	0.144181	0.154412	0.280276	0.162981	0	0.346791	0.335113	0.602752	0.354594
AT1G70850	-0.00041835	-0.00031338	0.998912	-0.000270209	2.86784e-05	7.15316e-06	-6.81512e-07	0	0.263708	0.353841	0.587575	0.45962	0	0.510514	0.569941	0.831683	0.659873
AT1G70900	-0.016703	-0.00670144	0.986457	-0.00531955	0.000738088	-0.000192917	-2.19461e-05	0	0.46828	0.431544	0.629708	0.432502	0	0.714789	0.640649	0.858788	0.639011
AT1G70940	-0.00414809	-0.02406	0.922354	0.0143129	0.00246893	-0.00061541	-4.95494e-05	0	3.65176e-05	2.60366e-08	0.00113857	0.000177425	0	0.000365529	6.17321e-07	0.015753	0.00179139
AT1G70980	0.0259109	-0.112776	0.549005	0.0046703	0.0154484	0.000812531	-0.000340006	6.42317e-248	0.780359	5.6205e-13	0.373854	1.00753e-07	9.80609e-248	0.90939	3.11764e-11	0.689832	2.44693e-06
AT1G71020	-0.00706985	-0.040921	0.919363	-0.00533661	0.00505573	-5.74777e-05	-0.000100149	0	0.400754	4.90951e-10	0.868242	3.52573e-05	0	0.653928	1.6101e-08	0.966024	0.000453251
AT1G71030	0.000878669	-0.00514208	0.936217	-0.000788578	0.000665417	-2.28492e-05	-1.07584e-05	0	0.851947	0.218351	0.921038	0.50418	0	0.948061	0.421143	0.985406	0.696152
AT1G71040	0.00529482	0.00317413	0.985396	0.00750549	-0.000208839	-4.50943e-05	-1.66267e-07	0	0.0006606	0.458927	0.707626	0.984211	0	0.00469261	0.665577	0.899269	1
AT1G71110	0.0609039	0.0209431	0.950659	0.0331176	0.000641005	0.000775448	-6.61285e-05	0	0.0250988	0.734718	0.336369	0.240698	0	0.0982735	0.865632	0.659096	0.45204
AT1G71190	-0.00046075	-0.0119708	0.967568	0.00664408	0.000980242	-0.000263213	-1.61898e-05	0	0.0183371	0.00652845	0.0867378	0.131625	0	0.0767834	0.0321663	0.332781	0.309954
AT1G71200	0.0169222	0.0109632	0.936626	0.000829843	0.000381041	0.000954614	-4.58665e-05	0	0.964251	0.872691	0.349126	0.519783	0	0.996173	0.946243	0.670796	0.710492
AT1G71210	-0.0129027	0.099441	0.99076	0.021985	-0.000880783	-0.00207018	-0.00016821	1.42742e-153	0.568002	0.858096	0.324349	0.251788	1.98465e-153	0.78666	0.937832	0.646396	0.464783
AT1G71220	0.00350975	0.00397299	0.989293	-0.00878948	-0.000110219	0.000737021	-1.17042e-05	0	0.0747101	0.86133	0.0061555	0.533577	0	0.224006	0.940222	0.0581	0.719679
AT1G71230	-0.0265603	0.078051	0.943846	-0.0124111	0.0125343	-0.00145565	-0.000704857	1.77719e-172	0.719708	0.00461658	0.440417	8.98603e-08	2.52807e-172	0.877269	0.0242175	0.737493	2.2368e-06
AT1G71240	0.058304	-0.124118	0.375539	0.0521925	0.00770772	-0.000915566	-1.6012e-05	6.8289e-25	0.162784	0.107161	0.653568	0.910564	7.74804e-25	0.376036	0.261094	0.873822	0.960446
AT1G71260	-0.0191055	-0.00812086	0.933729	-0.0296305	0.0027946	0.000585373	-9.49639e-05	0	0.000295153	0.00762563	0.189948	0.00234213	0	0.00230831	0.0363137	0.497484	0.0154981
AT1G71270	-0.000530447	-0.0128302	0.963813	0.00526639	-0.000232344	-0.000185888	3.70429e-05	0	0.235619	0.68256	0.442872	0.0286449	0	0.473557	0.833014	0.739302	0.107341
AT1G71310	-0.132351	-0.00595872	0.832514	-0.0415506	0.005921	-0.00312644	-0.000217704	0	0.0665837	0.0410292	0.0113999	0.0116901	0	0.205892	0.130325	0.0913822	0.0549696
AT1G71340	0.0566453	-0.112851	0.488493	0.0509101	0.0219522	-0.000935085	-0.000624793	6.5112e-32	0.232339	5.6911e-05	0.6876	0.000120538	7.53602e-32	0.468537	0.000611725	0.889896	0.00128488
AT1G71350	0.00621904	-0.0154115	0.959377	0.00253634	0.002466	-0.000224248	-4.74019e-05	0	0.713536	0.00527407	0.551868	0.0718943	0	0.874635	0.0269737	0.811369	0.20773
AT1G71360	0.00197336	0.00197336	0.996049	-0.0129975	0.000290224	0.000691302	-1.31226e-05	0	0.0450093	0.72645	0.0506618	0.595486	0	0.155787	0.860177	0.24313	0.768717
AT1G71440	-0.00198685	-0.0196061	0.934252	0.014022	0.000304426	-0.00096679	3.54547e-05	0	0.363414	0.87743	0.250691	0.546615	0	0.619784	0.948174	0.572335	0.729185
AT1G71480	0.0422271	-0.0206649	0.436302	-0.00450459	-0.00469523	0.00221164	0.000236184	7.5625e-22	0.922988	0.430953	0.384297	0.183647	8.50841e-22	0.979858	0.640449	0.694383	0.382268
AT1G71530	-0.0659376	-0.0536057	0.924917	-0.0514097	-0.00186522	0.000514862	0.000137884	1.997e-139	0.173236	0.699349	0.802581	0.337977	2.73095e-139	0.392214	0.842067	0.942775	0.549894
AT1G71692	-0.00187868	-0.066557	0.860963	-0.0608885	0.0125915	0.00266881	-0.000287889	1.77165e-118	0.109818	0.0106872	0.196832	0.0506055	2.35818e-118	0.29272	0.0470526	0.507235	0.16299
AT1G71695	-0.0680523	-0.0457648	0.835083	-0.0861381	0.000317976	0.001315	8.69315e-05	0	1.08097e-13	0.83024	0.0375869	0.049164	0	3.32656e-12	0.921623	0.201725	0.159635
AT1G71696	-0.0894751	0.406624	0.641112	-0.377288	-0.0318381	0.0120851	0.000362755	8.00935e-30	7.67244e-11	1.77256e-05	0.000133177	0.100766	9.22009e-30	1.73885e-09	0.000218794	0.00263017	0.26072
AT1G71697	0.0166771	0.00254009	0.724188	-0.0157206	0.00645227	0.00152932	-0.000305522	2.13967e-118	0.624489	0.116345	0.382734	0.0125774	2.84762e-118	0.824637	0.277461	0.693437	0.058138
AT1G71710	-0.076888	-0.0260365	0.844859	-0.0999624	0.00539903	0.0014469	-0.000156048	0	1.26949e-05	0.0653561	0.24678	0.0738414	0	0.00013861	0.183471	0.566673	0.211655
AT1G71720	0.162097	-0.0422656	0.513195	0.249212	0.00229848	-0.00348706	-2.48246e-05	3.98934e-101	5.22058e-24	0.466319	0.00954468	0.791732	5.20368e-101	3.21316e-22	0.671586	0.0801575	0.896485
AT1G71750	-0.03261	-0.0119392	0.969603	-0.0279386	0.00148154	0.000302693	-5.01428e-05	0	0.00298331	0.218414	0.55538	0.162107	0	0.0172177	0.421173	0.812412	0.35348
AT1G71790	-0.0899387	0.00675741	0.975133	-0.0135102	-0.00214129	-0.0036337	4.15378e-05	4.42637e-232	0.660461	0.58632	0.0303355	0.723124	6.67597e-232	0.84748	0.763134	0.174965	0.857142
[truncated: 6,989 more rows]
